# Supplementary material for: Stereoselective [3+2] cycloaddition of N-tert-butanesulfinyl imines to arynes facilitated by a removable PhSO2CF2 group: synthesis and transformation of cyclic sulfoximines
Source: Royal Society of Chemistry journal article supplement (doi:10.1039/c4cc05042h), 2014-01-01

Supporting Information for:

**Stereoselective [3+2] Cycloaddition of *N*-*tert*-Butanesulfinyl Imines  
to Arynes Facilitated by Removable PhSO<sub>2</sub>CF<sub>2</sub> Group: Synthesis  
and Transformation of Cyclic Sulfoximines**

Laijun Zhang,<sup>†</sup> Wenchao Ye,<sup>†</sup> Chuanfa Ni, Jian Rong and Jinbo Hu\*

Key Laboratory of Organofluorine Chemistry, Shanghai Institute of Organic Chemistry,

Chinese Academy of Sciences, 345 Ling-Ling Road, Shanghai 200032, China

\*E-mail: [jinbohu@sioc.ac.cn](mailto:jinbohu@sioc.ac.cn)

|                                                                                                                             |     |
|-----------------------------------------------------------------------------------------------------------------------------|-----|
| General.....                                                                                                                | S2  |
| 1. Preparation of <i>N</i> - <i>tert</i> -Butanesulfinyl Imines .....                                                       | S2  |
| 2. Screening of Reaction Conditions .....                                                                                   | S10 |
| 3. [3 + 2] Cycloaddition of PhSO <sub>2</sub> CF <sub>2</sub> -Sulfinimines with Arynes and Further<br>Transformation ..... | S11 |
| 3.1 [3 + 2] Cycloaddition .....                                                                                             | S11 |
| 3.2 Synthesis of Cyclic Sulfinamides.....                                                                                   | S27 |
| 3.3 <i>N</i> -(6-Bromonaphthalen-2-yl)methylation of Cyclic Sulfinamide <b>6a</b> ....                                      | S34 |
| 3.4 Synthesis of Cyclic Sulfinimines .....                                                                                  | S36 |
| 3.5 Addition to Cyclic Sulfinimines .....                                                                                   | S40 |
| 3.6 Oxidation of Cyclic Sulfinamide <b>9c</b> .....                                                                         | S44 |
| 3.7 Reductive Desulfonylation .....                                                                                         | S46 |
| 4. Determination of the Enantioselectivity .....                                                                            | S49 |
| 5. <sup>1</sup> H, <sup>19</sup> F, and <sup>13</sup> C NMR Spectrum of New Compounds .....                                 | S58 |

## General

Unless otherwise mentioned, solvents and reagents were purchased from commercial sources and used as received. The solvent THF was distilled from sodium, and the solvents MeCN, CH<sub>2</sub>Cl<sub>2</sub>, HMPA (hexamethylphosphoramide) and DMF were distilled from CaH<sub>2</sub> before being used. <sup>1</sup>H, <sup>19</sup>F and <sup>13</sup>C NMR spectra were recorded on a 400 MHz or 300 MHz NMR spectrometer. <sup>1</sup>H NMR chemical shifts were determined relative to internal (CH<sub>3</sub>)<sub>4</sub>Si (TMS) at δ 0.0 or to the signal of the residual protonated solvent: CDCl<sub>3</sub> δ 7.26. <sup>13</sup>C NMR chemical shifts were determined relative to internal TMS at δ 0.0. For the isolated compounds, <sup>19</sup>F NMR chemical shifts were determined relative to CFC<sub>3</sub> at δ 0.0. Mass spectra were obtained on a mass spectrometer. High-resolution mass data were recorded on a high-resolution mass spectrometer in the EI mode.

### 1. Preparation of N-tert-Butanesulfinyl Imines

#### 1.1 Preparation of Difluoro(phenylsulfonyl)methyl Ketones:

**Method 1:** Ketones **S1a**, **S1d-e**, **S1g-i**, and **S1j** were prepared by difluoro(phenylsulfonyl)methylation of the corresponding methyl esters according to the reported procedures.<sup>1</sup>

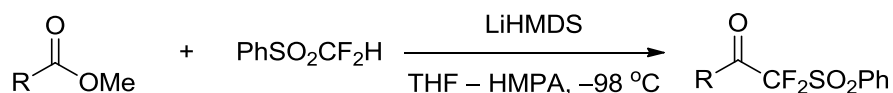

**Method 2:** Ketones **S1b-c** and **S1k** were prepared by oxidation of the corresponding known α-difluoro(phenylsulfonyl)methyl alcohols with DMSO/(COCl)<sub>2</sub>/Et<sub>3</sub>N (Swern Oxidation). Ketone **S1f** was prepared by oxidation with Jones' reagent.

<sup>1</sup> Ni, C.; Zhang, L.; Hu, J. *J. Org. Chem.* **2009**, *74*, 3767.

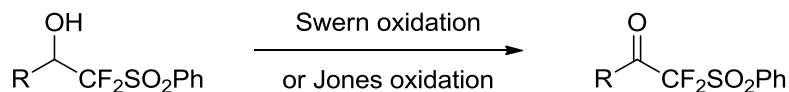

## 1.2 Condensation of *N*-*tert*-Butylsulfonamide and the Corresponding Ketones.

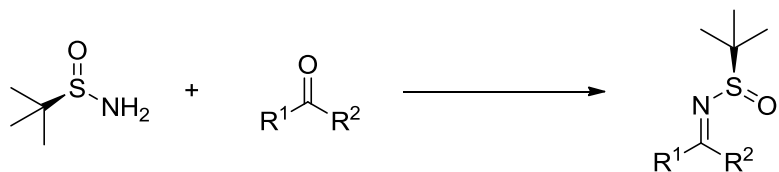

Non-fluorinated imines **1a-c**,<sup>2</sup> difluoromethyl imine **1d**, trifluoromethyl imine **1e**,<sup>3</sup> and monofluoromethyl imine **1f** were prepared by condensation of (*R*)-*N*-*tert*-butylsulfonamide and the corresponding carbonyl compounds. The *Z*-configuration of the imino bond in difluoromethyl imine **1d** was established by single-crystal X-ray analysis of its analogue **S2** (see SI Section 3.1), and the assumption was made that monofluoromethyl imine **1f** possessed a similar geometry.

Difluoro(phenylsulfonyl)methyl imines **2a-k** (Table S1) were prepared according to the following typical procedures:

### Typical procedures:

Under N<sub>2</sub> atmosphere, a mixture of (*R*)-*N*-*tert*-butylsulfonamide (> 99% ee, 9.6 mmol, 1.162 g), (phenylsulfonyl)difluoromethyl phenyl ketone (**S1a**; 8.0 mmol, 2.368 g), Ti(OEt)<sub>4</sub> (48.0 mmol, 10.944 g) in THF (50.0 mL) was heated to reflux for 36 h, then the reaction mixture was cooled to room temperature and poured into an equal volume of brine while rapidly stirring. The resulting suspension was filtered through a plug of celite, and the filter cake was washed with EtOAc. The filtrate was transferred to a separatory funnel where the organic layer was washed with brine. The brine layer was extracted with EtOAc for three times, and the combined organic phase was dried over anhydrous MgSO<sub>4</sub>. The volatile solvents were removed under vacuum, and the crude product was purified by

<sup>2</sup> (a) Liu, G.; Cogan, D. A.; Owens, T. D.; Tang, T. P.; Ellman, J. A. *J. Org. Chem.* **1999**, *64*, 1278. (b) Plobeck, N.; Powell, D. *Tetrahedron: Asym.* **2002**, *13*, 303. (c) Morton, D.; Pearson, D.; Fielda, R. A.; Stockman, R. A. *Chem. Commun.* **2006**, 1833.

<sup>3</sup> Wang, H.; Zhao, X.; Li, Y.; Lu, L. *Org. Lett.* **2006**, *8*, 1379.

column chromatography (silica gel; ethyl acetate/petroleum ether = 1:10 – 1:5 v/v) to afford **2a** (2.171 g, 68% yield).

**Table S1. Preparation of PhSO<sub>2</sub>CF<sub>2</sub>-Sulfinimines**

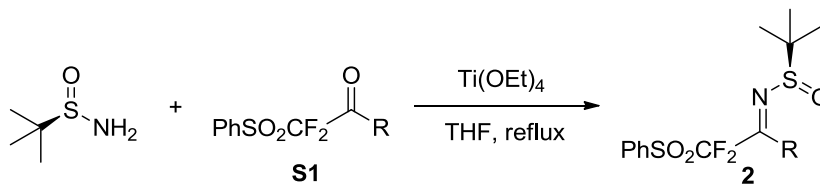

| entry | ketone     | R                                               | Ti(OEt) <sub>4</sub> (equiv) | time (h) | sulfinimine | yield (%) <sup>a</sup> |
|-------|------------|-------------------------------------------------|------------------------------|----------|-------------|------------------------|
| 1     | <b>S1a</b> | Ph                                              | 6.0                          | 36       | <b>2a</b>   | 68                     |
| 2     | <b>S1b</b> | 3-MeC <sub>6</sub> H <sub>4</sub>               | 5.0                          | 24       | <b>2b</b>   | 43 <sup>b</sup>        |
| 3     | <b>S1c</b> | 4-MeC <sub>6</sub> H <sub>4</sub>               | 5.0                          | 24       | <b>2c</b>   | 41 <sup>b</sup>        |
| 4     | <b>S1d</b> | 4-ClC <sub>6</sub> H <sub>4</sub>               | 5.0                          | 24       | <b>2d</b>   | 48                     |
| 5     | <b>S1e</b> | 4-BrC <sub>6</sub> H <sub>4</sub>               | 4.0                          | 24       | <b>2e</b>   | 55                     |
| 6     | <b>S1f</b> | 3-MeOC <sub>6</sub> H <sub>4</sub>              | 6.0                          | 36       | <b>2f</b>   | 52 <sup>b</sup>        |
| 7     | <b>S1g</b> | 4-MeOC <sub>6</sub> H <sub>4</sub>              | 6.0                          | 24       | <b>2g</b>   | 46 <sup>b</sup>        |
| 8     | <b>S1h</b> | 4-CF <sub>3</sub> C <sub>6</sub> H <sub>4</sub> | 4.0                          | 36       | <b>2h</b>   | 71                     |
| 9     | <b>S1i</b> | 6-Br-2-Naph                                     | 5.0                          | 48       | <b>2i</b>   | 60                     |
| 10    | <b>S1j</b> | ( <i>E</i> )-PhCH=CH                            | 5.0                          | 24       | <b>2j</b>   | 75                     |
| 11    | <b>S1k</b> | <i>i</i> Pr                                     | 6.0                          | 48       | <b>2k</b>   | 53                     |

<sup>a</sup> Isolated yield. <sup>b</sup> The isolated product **2** is contaminated by trace amount (1 – 2%) of difluoro(phenylsulfonyl)methyl alcohol due to the reduction of ketone **S1** during the condensation reaction using Ti(OEt)<sub>4</sub> (for details, see the <sup>19</sup>F NMR spectrum).

### Characterization Data:

(*R,E*)-*N*-[2,2-Difluoro-1-phenyl-2-(phenylsulfonyl)ethylidene]-2-methylpropane-2-sulfinamide (**2a**)

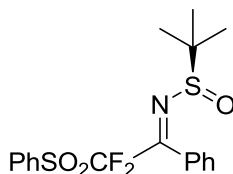

Mp: 57–59 °C. [α]<sub>D</sub><sup>22</sup> –171.3 (c 1.00, CHCl<sub>3</sub>). <sup>1</sup>H NMR (300 MHz, CDCl<sub>3</sub>): δ 8.00 (d, *J* = 7.6 Hz, 2H), 7.76 (t, *J* = 7.5 Hz, 1H), 7.61 (t, *J* = 7.6 Hz, 2H), 7.52–7.38 (m, 5H), 1.33 (s,



9H).  $^{19}\text{F}$  NMR (282 MHz,  $\text{CDCl}_3$ ):  $\delta$  -97.8 (d,  $J = 231.4$  Hz, 1F), -99.3 (d,  $J = 231.4$  Hz, 1F).  $^{13}\text{C}$  NMR (100 MHz,  $\text{CDCl}_3$ ):  $\delta$  165.8 (t,  $J = 25.3$  Hz), 135.6, 133.1, 130.9, 130.8, 130.6, 129.4, 128.3, 127.8, 116.5 (t,  $J = 295.5$  Hz), 60.2, 22.8. IR (film): 2979, 1605, 1580, 1447, 1150, 1111, 1086  $\text{cm}^{-1}$ . MS (ESI,  $m/z$ ): 422.0 ( $\text{M} + \text{Na}^+$ ). Anal. Calcd for  $\text{C}_{18}\text{H}_{19}\text{F}_2\text{NO}_3\text{S}_2$ : C, 54.12; H, 4.79; N, 3.51; Found: C, 54.35; H, 4.95; N, 3.13.

(*R,E*)-*N*-[2,2-Difluoro-2-(phenylsulfonyl)-1-*m*-tolylethylidene]-2-methylpropane-2-sulfinamide (**2b**)

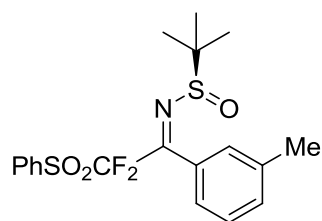

$[\alpha]_{\text{D}}^{22}$  -175.0 ( $c$  1.00,  $\text{CHCl}_3$ ).  $^1\text{H}$  NMR (300 MHz,  $\text{CDCl}_3$ ):  $\delta$  8.00 (d,  $J = 7.8$  Hz, 2H), 7.76 (t,  $J = 7.5$  Hz, 1H), 7.61 (t,  $J = 7.8$  Hz, 2H), 7.31–7.24 (m, 4H), 2.38 (s, 3H), 1.33 (s, 9H).  $^{19}\text{F}$  NMR (282 MHz,  $\text{CDCl}_3$ ):  $\delta$  -98.1 (d,  $J = 233.9$  Hz, 1F), -99.6 (d,  $J = 233.9$  Hz, 1F).  $^{13}\text{C}$  NMR (100 MHz,  $\text{CDCl}_3$ ):  $\delta$  166.3 (t,  $J = 20.1$  Hz), 137.6, 135.6, 133.1, 131.7, 130.9, 130.6, 129.4, 128.5, 127.7, 125.5, 116.5 (t,  $J = 295.6$  Hz), 59.9, 22.7, 21.5. IR (film): 2963, 1618, 1584, 1449, 1351, 1171, 1145, 1107  $\text{cm}^{-1}$ . MS (ESI,  $m/z$ ): 436.0 ( $\text{M} + \text{Na}^+$ ). HRMS (ESI): calcd. for  $\text{C}_{19}\text{H}_{21}\text{F}_2\text{NO}_3\text{S}_2$ : ( $\text{M} + \text{Na}^+$ ): 436.0823; Found: 436.0834.

(*R,E*)-*N*-[2,2-Difluoro-2-(phenylsulfonyl)-1-*p*-tolylethylidene]-2-methylpropane-2-sulfinamide (**2c**)

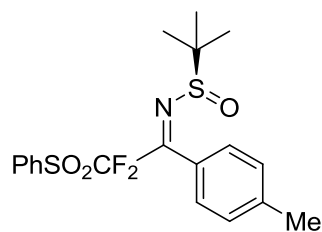

$[\alpha]_{\text{D}}^{22}$  -198.1 ( $c$  1.00,  $\text{CHCl}_3$ ).  $^1\text{H}$  NMR (400 MHz,  $\text{CDCl}_3$ ):  $\delta$  8.00 (d,  $J = 7.6$  Hz, 2H),

7.76 (t,  $J = 7.6$  Hz, 1H), 7.61 (t,  $J = 7.6$  Hz, 2H), 7.38 (d,  $J = 8.1$  Hz, 2H), 7.23 (d,  $J = 8.1$  Hz, 2H), 2.38 (s, 3H), 1.32 (s, 9H).  $^{19}\text{F}$  NMR (376 MHz,  $\text{CDCl}_3$ ):  $\delta$  -99.0 (d,  $J = 232.0$  Hz, 1F), -101.1 (d,  $J = 232.0$  Hz, 1F).  $^{13}\text{C}$  NMR (100 MHz,  $\text{CDCl}_3$ ):  $\delta$  165.9 (t,  $J = 24.2$  Hz), 141.3, 135.6, 133.1, 130.9, 129.4, 128.5, 128.4, 127.7, 116.6 (t,  $J = 295.5$  Hz), 60.0, 22.7, 21.6. IR (film): 2964, 1608, 1585, 1509, 1447, 1449, 1351, 1151  $\text{cm}^{-1}$ . MS (ESI,  $m/z$ ): 436.0 ( $\text{M} + \text{Na}^+$ ). HRMS (ESI): calcd. for  $\text{C}_{19}\text{H}_{21}\text{F}_2\text{NO}_3\text{S}_2$ : ( $\text{M} + \text{Na}^+$ ): 436.0823; Found: 436.0831.

(*R,E*)-*N*-[1-(4-Chlorophenyl)-2,2-difluoro-2-(phenylsulfonyl)ethylidene]-2-methylpropane-2-sulfinamide (**2d**)

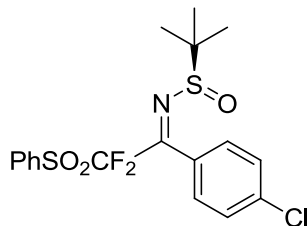

Mp: 61–63 °C.  $[\alpha]_{\text{D}}^{22}$  -179.8 ( $c$  1.00,  $\text{CHCl}_3$ ).  $^1\text{H}$  NMR (300 MHz,  $\text{CDCl}_3$ ):  $\delta$  7.99 (d,  $J = 7.8$  Hz, 2H), 7.78 (t,  $J = 7.2$  Hz, 1H), 7.62 (t,  $J = 7.5$  Hz, 2H), 7.43 (d,  $J = 8.9$  Hz, 2H), 7.39 (d,  $J = 8.9$  Hz, 2H), 1.34 (s, 9H).  $^{19}\text{F}$  NMR (282 MHz,  $\text{CDCl}_3$ ):  $\delta$  -98.7 (d,  $J = 231.5$  Hz, 1F), -99.9 (d,  $J = 231.5$  Hz, 1F).  $^{13}\text{C}$  NMR (100 MHz,  $\text{CDCl}_3$ ):  $\delta$  164.1 (t,  $J = 24.7$  Hz), 137.2, 135.8, 132.8, 130.9, 129.8, 129.5, 128.8, 128.1, 116.4 (t,  $J = 294.7$  Hz), 60.7, 22.9. IR (film): 1627, 1590, 1488, 1449, 1351, 1151, 1109, 1091  $\text{cm}^{-1}$ . MS (ESI,  $m/z$ ): 456.0 ( $\text{M} + \text{Na}^+$ ). HRMS (ESI): calcd. for  $\text{C}_{18}\text{H}_{18}\text{ClF}_2\text{NO}_3\text{S}_2$ : ( $\text{M} + \text{Na}^+$ ): 456.0277; Found: 456.0294.

(*R,E*)-*N*-[1-(4-Bromophenyl)-2,2-difluoro-2-(phenylsulfonyl)ethylidene]-2-methylpropane-2-sulfinamide (**2e**)

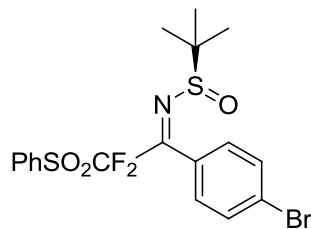

Mp: 95–97 °C.  $[\alpha]_D^{22}$   $-193.5$  ( $c$  1.00,  $\text{CHCl}_3$ ).  $^1\text{H}$  NMR (300 MHz,  $\text{CDCl}_3$ ):  $\delta$  7.99 (d,  $J$  = 7.9 Hz, 2H), 7.78 (t,  $J$  = 7.6 Hz, 1H), 7.63 (t,  $J$  = 7.3 Hz, 2H), 7.56 (d,  $J$  = 8.5 Hz, 2H), 7.35 (d,  $J$  = 8.5 Hz, 2H), 1.34 (s, 9H).  $^{19}\text{F}$  NMR (282 MHz,  $\text{CDCl}_3$ ):  $\delta$   $-98.7$  (d,  $J$  = 231.5 Hz, 1F),  $-99.9$  (d,  $J$  = 231.5 Hz, 1F).  $^{13}\text{C}$  NMR (100 MHz,  $\text{CDCl}_3$ ):  $\delta$  164.2 (t,  $J$  = 25.5 Hz), 135.8, 132.8, 131.0, 130.9, 129.9, 129.5, 129.3, 125.7, 116.3 (t,  $J$  = 296.0 Hz), 60.7, 22.9. IR (film): 2961, 1628, 1583, 1485, 1449, 1350, 1149, 1108  $\text{cm}^{-1}$ . MS (ESI,  $m/z$ ): 500.0 ( $\text{M} + \text{Na}^+$ ). HRMS (ESI): calcd. for  $\text{C}_{18}\text{H}_{18}\text{BrF}_2\text{NO}_3\text{S}_2$ : ( $\text{M} + \text{Na}^+$ ): 499.9772; Found: 499.9790.

(*R,E*)-*N*-[2,2-Difluoro-1-(3-methoxyphenyl)-2-(phenylsulfonyl)ethylidene]-2-methylpropane-2-sulfonamide (**2f**)

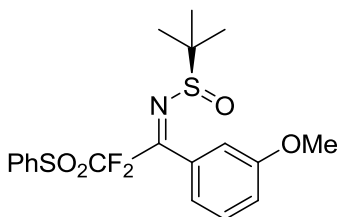

$[\alpha]_D^{22}$   $-163.3$  ( $c$  1.00,  $\text{CHCl}_3$ ).  $^1\text{H}$  NMR (300 MHz,  $\text{CDCl}_3$ ):  $\delta$  8.00 (d,  $J$  = 7.7 Hz, 2H), 7.76 (t,  $J$  = 7.7 Hz, 1H), 7.61 (t,  $J$  = 7.3 Hz, 2H), 7.34 (t,  $J$  = 7.7 Hz, 1H), 7.08–6.97 (m, 3H), 3.82 (s, 3H), 1.33 (s, 9H).  $^{19}\text{F}$  NMR (282 MHz,  $\text{CDCl}_3$ ):  $\delta$   $-98.9$  (d,  $J$  = 231.5 Hz, 1F),  $-100.3$  (d,  $J$  = 231.6 Hz, 1F).  $^{13}\text{C}$  NMR (100 MHz,  $\text{CDCl}_3$ ):  $\delta$  165.9 (t,  $J$  = 24.7 Hz), 158.9, 135.7, 133.1, 131.9, 131.0, 129.5, 129.1, 120.7, 116.0, 116.56 (t,  $J$  = 295.8 Hz), 113.8, 60.1, 55.4, 22.8. IR (film): 2964, 1600, 1581, 1487, 1450, 1351, 1293, 1147  $\text{cm}^{-1}$ . MS (ESI,  $m/z$ ): 452.1 ( $\text{M} + \text{Na}^+$ ). HRMS (ESI): calcd. for  $\text{C}_{19}\text{H}_{21}\text{F}_2\text{NO}_4\text{S}_2$ : ( $\text{M} + \text{Na}^+$ ): 452.0772; Found: 452.0782.

(*R,E*)-*N*-[2,2-Difluoro-1-(4-methoxyphenyl)-2-(phenylsulfonyl)ethylidene]-2-methylpropane-2-sulfinamide (**2g**)

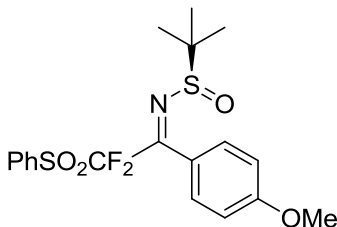

Mp: 58–60 °C.  $[\alpha]_D^{22} -229.2$  ( $c$  1.00,  $\text{CHCl}_3$ ).  $^1\text{H}$  NMR (300 MHz,  $\text{CDCl}_3$ ):  $\delta$  8.00 (d,  $J = 7.5$  Hz, 2H), 7.76 (t,  $J = 7.5$  Hz, 1H), 7.61 (t,  $J = 7.5$  Hz, 2H), 7.47 (d,  $J = 8.5$  Hz, 2H), 6.93 (d,  $J = 8.5$  Hz, 2H), 3.83 (s, 3H), 1.32 (s, 9H).  $^{19}\text{F}$  NMR (282 MHz,  $\text{CDCl}_3$ ):  $\delta$  -97.9 (d,  $J = 233.4$  Hz, 1F), -99.9 (d,  $J = 233.4$  Hz, 1F).  $^{13}\text{C}$  NMR (100 MHz,  $\text{CDCl}_3$ ):  $\delta$  165.4 (t,  $J = 24.5$  Hz), 161.7, 135.5, 133.2, 130.6, 129.5, 122.5, 116.8 (t,  $J = 294.1$  Hz), 113.9, 113.2, 60.0, 55.3, 22.7. IR (film): 2970, 1607, 1593, 1513, 1348, 1147, 1085  $\text{cm}^{-1}$ . MS (ESI,  $m/z$ ): 452.0 ( $\text{M} + \text{Na}^+$ ). Anal. Calcd for  $\text{C}_{19}\text{H}_{21}\text{F}_2\text{NO}_4\text{S}_2$ : C, 53.13; H, 4.93; N, 3.26; Found: C, 53.13; H, 4.98; N, 2.93.

(*R,E*)-*N*-{2,2-difluoro-2-(phenylsulfonyl)-1-[4-(trifluoromethyl)phenyl]ethylidene}-2-methylpropane-2-sulfinamide (**2h**)

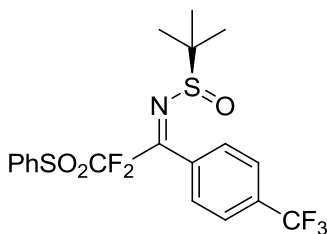

Yellow solid. Mp: 84–86 °C.  $[\alpha]_D^{28} = -179.9$  ( $c = 1.00$ ,  $\text{CHCl}_3$ ).  $^1\text{H}$  NMR (300 MHz,  $\text{CDCl}_3$ ):  $\delta$  8.00 (d,  $J = 7.5$  Hz, 2H), 7.81–7.76 (m, 1H), 7.70–7.61 (m, 6H), 1.36 (s, 9H).  $^{19}\text{F}$  NMR (282 MHz,  $\text{CDCl}_3$ ):  $\delta$  -64.2 (s, 3F), -100.6 (d,  $J = 231$  Hz, 1F), -101.6 (d,  $J = 231$  Hz, 1F).  $^{13}\text{C}$  NMR (100 MHz,  $\text{CDCl}_3$ ):  $\delta$  163.7 (t,  $J = 25.5$  Hz), 135.9, 134.2, 132.8, 132.4 (q,  $J = 32.9$  Hz), 130.9, 129.5, 128.8, 124.7 (q,  $J = 3.6$  Hz), 123.6 (q,  $J = 271.2$  Hz),

116.3 (t,  $J = 293.9$  Hz), 60.9, 22.9. IR (KBr): 3078, 2980, 1614, 1450, 1324, 1512, 1109, 1067, 1012, 839, 685, 620, 587, 536  $\text{cm}^{-1}$ . MS (ESI,  $m/z$ ): 468( $[M + H]^+$ ). HRMS (ESI,  $m/z$ ): Calcd. for  $\text{C}_{19}\text{H}_{18}\text{F}_5\text{NO}_3\text{S}_2\text{Na}^+$  ( $[M + \text{Na}]^+$ ): 490.0546; Found: 490.0554.

(*R,E*)-*N*-[1-(6-Bromonaphthalen-2-yl)-2,2-difluoro-2-(phenylsulfonyl)ethylidene]-2-methylpropane-2-sulfinamide (**2i**)

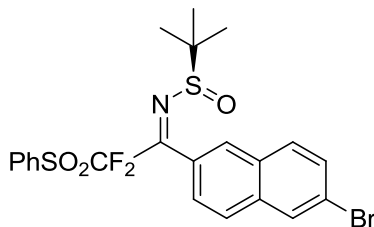

Mp: 42–45 °C.  $[\alpha]_{\text{D}}^{20} -217.0$  ( $c$  1.00,  $\text{CHCl}_3$ ).  $^1\text{H}$  NMR (300 MHz,  $\text{CDCl}_3$ ):  $\delta$  8.01(s, 2H), 7.99 (s, 1H), 7.95 (s, 1H), 7.81–7.71 (m, 3H), 7.64–7.54 (m, 4H), 1.35 (s, 9H).  $^{19}\text{F}$  NMR (282 MHz,  $\text{CDCl}_3$ ):  $\delta$  -98.4 (d,  $J = 231.6$  Hz, 1F), -99.8 (d,  $J = 231.6$  Hz, 1F).  $^{13}\text{C}$  NMR (100 MHz,  $\text{CDCl}_3$ ):  $\delta$  165.0 (t,  $J = 24.8$  Hz), 135.7, 134.8, 132.8, 130.8, 130.5, 130.3, 130.2, 129.9, 129.4, 128.6, 128.4, 126.4, 125.9, 122.0, 116.5 (t,  $J = 291.5$  Hz), 60.4, 22.7. IR (film): 2963, 1625, 1583, 1448, 1350, 1148, 1129, 1102  $\text{cm}^{-1}$ . MS (ESI,  $m/z$ ): 528.0 ( $M + H^+$ ). HRMS (ESI): calcd. for  $\text{C}_{22}\text{H}_{20}\text{BrF}_2\text{NO}_3\text{S}_2$ : ( $M + \text{Na}^+$ ): 549.9928; Found: 549.9936.

(*R,E*)-*N*-[(*E*)-1,1-Difluoro-4-phenyl-1-(phenylsulfonyl)but-3-en-2-ylidene]-2-methylpropane-2-sulfinamide (**2j**)

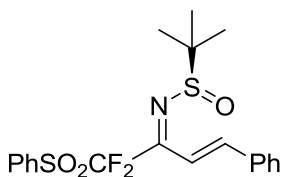

Mp: 76–78 °C.  $[\alpha]_{\text{D}}^{22} -616.9$  ( $c$  1.00,  $\text{CHCl}_3$ ).  $^1\text{H}$  NMR (300 MHz,  $\text{CDCl}_3$ ):  $\delta$  8.12–8.00 (m, 3H), 7.77 (t,  $J = 7.5$  Hz, 1H), 7.64 (t,  $J = 7.9$  Hz, 2H), 7.60–7.53 (m, 2H), 7.47 (d,  $J = 17.2$  Hz, 1H), 7.41–7.35 (m, 3H), 1.34 (s, 9H).  $^{19}\text{F}$  NMR (282 MHz,  $\text{CDCl}_3$ ):  $\delta$  -95.9 (d,  $J$

= 237.8 Hz, 1F), -98.7 (d,  $J = 237.8$  Hz, 1F).  $^{13}\text{C}$  NMR (100 MHz,  $\text{CDCl}_3$ ):  $\delta$  159.7 (t,  $J = 22.6$  Hz), 145.2 (t,  $J = 4.6$  Hz), 135.6, 135.1, 133.0, 130.9, 130.8, 129.4, 128.9, 128.5, 117.8 (t,  $J = 295.3$  Hz), 116.7, 61.2, 23.0. IR (film): 2975, 1614, 1576, 1559, 1449, 1353, 1172, 1117  $\text{cm}^{-1}$ . MS (ESI,  $m/z$ ): 448.0 ( $\text{M} + \text{Na}^+$ ). Anal. Calcd for  $\text{C}_{20}\text{H}_{21}\text{F}_2\text{NO}_3\text{S}_2$ : C, 56.45; H, 4.97; N, 3.29; Found: C, 56.62; H, 5.07; N, 2.89.

(*R,E*)-*N*-[1,1-Difluoro-3-methyl-1-(phenylsulfonyl)butan-2-ylidene]-2-methylpropane-2-sulfinamide (**2k**)

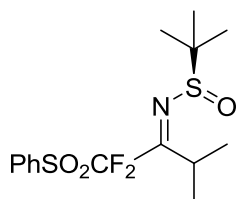

$[\alpha]_{\text{D}}^{22} -35.9$  ( $c$  1.00,  $\text{CHCl}_3$ ).  $^1\text{H}$  NMR (300 MHz,  $\text{CDCl}_3$ ):  $\delta$  7.99 (d,  $J = 7.7$  Hz, 2H), 7.77 (t,  $J = 7.5$  Hz, 1H), 7.63 (t,  $J = 7.8$  Hz, 2H), 3.94–3.78 (m, 1H), 1.38–1.28 (m, 15H).  $^{19}\text{F}$  NMR (282 MHz,  $\text{CDCl}_3$ ):  $\delta$  -96.6 (d,  $J = 237.6$  Hz, 1F), -100.7 (d,  $J = 237.7$  Hz, 1F).  $^{13}\text{C}$  NMR (100 MHz,  $\text{CDCl}_3$ ):  $\delta$  172.9 (t,  $J = 22.2$  Hz), 135.5, 133.3, 130.8, 129.4, 117.6 (t,  $J = 297.9$  Hz), 60.0, 32.6, 22.8, 20.1, 19.3. IR (film): 2970, 1630, 1585, 1450, 1351, 1165, 1091  $\text{cm}^{-1}$ . MS (ESI,  $m/z$ ): 388.0 ( $\text{M} + \text{Na}^+$ ). HRMS (ESI): calcd. for  $\text{C}_{15}\text{H}_{21}\text{F}_2\text{NO}_3\text{S}_2$ : ( $\text{M} + \text{Na}^+$ ): 388.0823; Found: 388.0831.

## 2. Screening of Reaction Conditions

Table S2. Reaction between **2a** and **3a** under Various Conditions

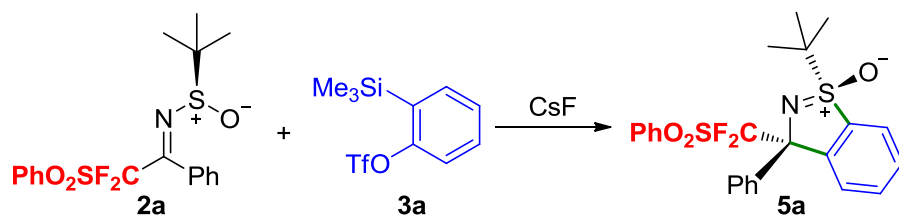

| entry | 2a:3a:CsF   | solvent            | temp. (°C) | time (h) | yield (%) <sup>a</sup> | dr <sup>b</sup> | er <sup>c</sup> |
|-------|-------------|--------------------|------------|----------|------------------------|-----------------|-----------------|
| 1     | 1.0:2.0:3.0 | CH <sub>3</sub> CN | rt         | 48       | 74                     | >99:1           | >99:1           |
| 2     | 1.0:2.0:3.0 | PhCH <sub>3</sub>  | rt         | 24       | 0                      | —               | —               |
| 3     | 1.0:2.0:3.0 | THF                | rt         | 24       | trace                  | —               | —               |
| 4     | 1.0:1.5:2.0 | CH <sub>3</sub> CN | rt         | 48       | 59                     | >99:1           | >99:1           |
| 5     | 1.0:1.5:2.0 | CH <sub>3</sub> CN | 60         | 24       | 55                     | >99:1           | >99:1           |
| 6     | 1.0:2.0:3.0 | CH <sub>3</sub> CN | 60         | 18       | 70                     | >99:1           | >99:1           |
| 7     | 1.0:2.5:4.0 | CH <sub>3</sub> CN | 60         | 12       | 76                     | >99:1           | >99:1           |
| 8     | 1.0:2.5:4.0 | CH <sub>3</sub> CN | rt         | 12       | 84                     | >99:1           | >99:1           |
| 9     | 1.0:3.0:5.0 | CH <sub>3</sub> CN | 80         | 12       | 78                     | >99:1           | >99:1           |
| 10    | 1.0:3.0:5.0 | CH <sub>3</sub> CN | rt         | 12       | 87                     | >99:1           | >99:1           |
| 11    | 1.0:3.0:5.0 | CH <sub>3</sub> CN | rt         | 4        | 80                     | >99:1           | >99:1           |

<sup>a</sup> Isolated yield. <sup>b</sup> Determined by <sup>19</sup>F NMR spectroscopy of the crude product. <sup>c</sup> Determined by chiral HPLC.

### 3. [3 + 2] Cycloaddition of PhSO<sub>2</sub>CF<sub>2</sub>-Sulfinimines with Arynes and Further Transformation

#### 3.1 [3 + 2] Cycloaddition.

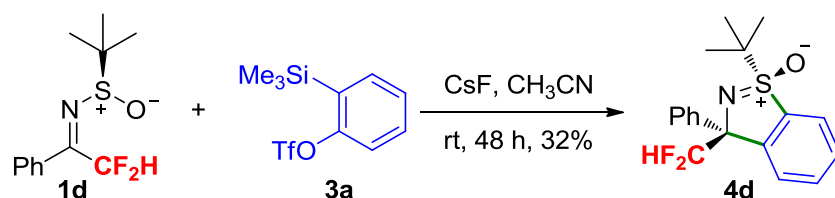

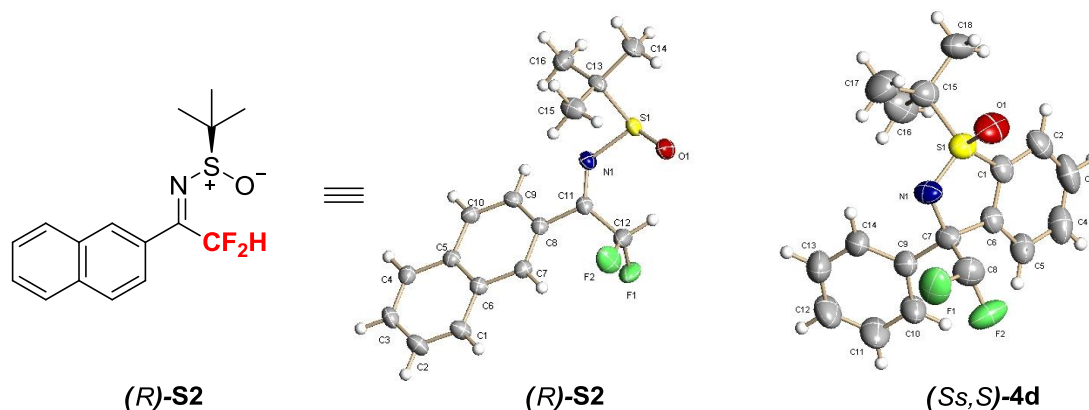

**Figure S1** Structures of Difluoromethyl Imine (*R*)-**S2** and Cyclic Sulfinamide (*Ss,S*)-**4d** in the Crystals

### Experimental Procedures:

To a Schlenk tube containing sulfinimine (*R*)-**1d** (0.104 g, 0.4 mmol), aryne precursor **3a** (0.238 g, 0.8 mmol), and CH<sub>3</sub>CN (8.0 mL) was added CsF (0.182 g, 1.2 mmol). The tube was sealed with a rubber septum, and then the reaction mixture was stirred at room temperature for 48 h. After quenched with brine, the reaction mixture was extracted with Et<sub>2</sub>O (30 mL × 3), and the combined organic phase was dried over anhydrous MgSO<sub>4</sub>. The volatile solvents were removed under vacuum, and the crude product was purified by column chromatography (silica gel; ethyl acetate/petroleum ether = 1:3 v/v) to give enantiopure product (*Ss,S*)-**4d** as a white solid (0.043 g, 32% yield).

The diastereoselectivity was determined by HPLC-MS (ESI) analysis of the crude product, and the enantioselectivity was determined by chiral HPLC analysis of the isolated product. The absolute configuration of *N*-TBS imine **1d** was determined by the X-ray crystal structure of its analogue **S2**, and that of product **4d** was determined by its X-ray crystal structure (Figure S1).

(*1S,3S*)-1-(*tert*-butyl)-3-(difluoromethyl)-3-phenylbenzo[*d*]isothiazole 1-oxide (**4d**)



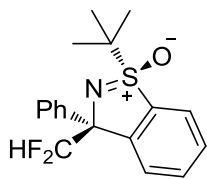

Mp: 145–148 °C.  $[\alpha]_D^{20}$   $-183.8$  ( $c$  0.60,  $\text{CHCl}_3$ ), >99:1 er. The enantiomeric ratio was determined by Lux 5u Cellulose–2 (250  $\times$  4.6 mm), hexane / IPA= 80 / 20 (v/v%), 0.7 mL/min,  $\lambda$  = 214 nm,  $t_R$  (major) = 9.03 min,  $t_R$  (minor) = 9.68 min.  $^1\text{H}$  NMR (300 MHz,  $\text{CDCl}_3$ ):  $\delta$  8.02 (d,  $J$  = 7.8 Hz, 1H), 7.83 (d,  $J$  = 7.8 Hz, 1H), 7.76 (t,  $J$  = 7.5 Hz, 1H), 7.71 (d,  $J$  = 7.8 Hz, 2H), 7.66 (t,  $J$  = 7.5 Hz, 1H), 7.40–7.28 (m, 3H), 6.09 (t,  $J$  = 56.5 Hz, 1H), 1.33 (s, 9H).  $^{19}\text{F}$  NMR (282 MHz,  $\text{CDCl}_3$ ):  $\delta$   $-123.4$  (dd,  $J$  = 267.4, 56.5 Hz, 1F),  $-124.9$  (dd,  $J$  = 267.3, 56.4 Hz, 1F).  $^{13}\text{C}$  NMR (100 MHz,  $\text{CDCl}_3$ ):  $\delta$  145.3 (d,  $J$  = 1.2 Hz), 138.5 (d,  $J$  = 2.4 Hz), 136.6, 132.7, 130.2, 128.3, 128.1, 127.9, 127.8 (dd,  $J$  = 3.3, 1.6 Hz), 124.7, 117.1 (t,  $J$  = 249.8 Hz), 79.2 (t,  $J$  = 21.1 Hz), 62.6, 24.2. IR (film) 1448, 1365, 1226, 1105, 1064, 965, 753, 705  $\text{cm}^{-1}$ . MS (ESI,  $m/z$ ): 336.2 ( $\text{M} + \text{H}^+$ ). Anal. Calcd for  $\text{C}_{18}\text{H}_{19}\text{F}_2\text{NOS}$ : C, 64.46; H, 5.71; N, 4.18; Found: C, 64.43; H, 5.77; N, 4.01.

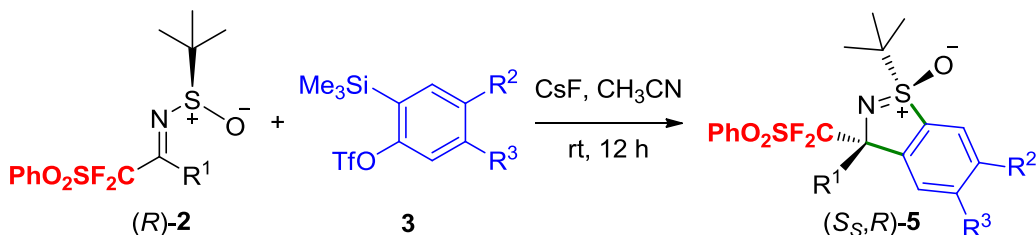

### Typical Procedures:

#### Method A (at rt for compounds **5a-l**, **5p**, and **5u**):

To a Schlenk tube containing sulfonamide (**R**)-**2a** ( $\text{R}^1 = \text{Ph}$ ) (0.120 g, 0.3 mmol), aryne precursor **3a** ( $\text{R}^2, \text{R}^3 = \text{H}$ ) (0.268 g, 0.9 mmol), and  $\text{CH}_3\text{CN}$  (5.0 mL) was added  $\text{CsF}$  (0.228 g, 1.5 mmol). The tube was sealed, and then the reaction mixture was stirred at room temperature for 12 h. After quenched with brine, the reaction mixture was extracted with  $\text{Et}_2\text{O}$  (30 mL  $\times$  3), and the combined organic phase was dried over anhydrous  $\text{MgSO}_4$ . The volatile solvents were removed under vacuum, and the crude product was

purified by column chromatography (silica gel; ethyl acetate/petroleum ether = 1:3 v/v) to give product (*Ss,R*)-**5a** ( $R^1 = \text{Ph}$ ;  $R^2, R^3 = \text{H}$ ) as a white solid (0.124 g, 87% yield).

**Method B** (at 80 °C for compounds **5m-o** and **5q-t**):

To a Schlenk tube containing sulfinimine (*R*)-**2a** ( $R^1 = \text{Ph}$ ) (0.239 g, 0.6 mmol), aryne precursor **3d** ( $R^2, R^3 = \text{OMe}$ ) (0.644 g, 1.8 mmol), and  $\text{CH}_3\text{CN}$  (5.0 mL) was added  $\text{CsF}$  (0.456 g, 3.0 mmol). The tube was sealed, and then the reaction mixture was stirred at 80 °C for 12 h. After cooled to rt and quenched with brine, the reaction mixture was extracted with  $\text{Et}_2\text{O}$  (40 mL  $\times$  3), and the combined organic phase was dried over anhydrous  $\text{MgSO}_4$ . The volatile solvents were removed under vacuum, and the crude product was purified by column chromatography (silica gel; ethyl acetate/petroleum ether = 1:1.5 v/v) to give product (*Ss,R*)-**5s** ( $R^1 = \text{Ph}$ ;  $R^2, R^3 = \text{OMe}$ ) as a white solid (0.200 g, 62% yield).

### Example of Diastereoselectivity Determination by $^{19}\text{F}$ NMR

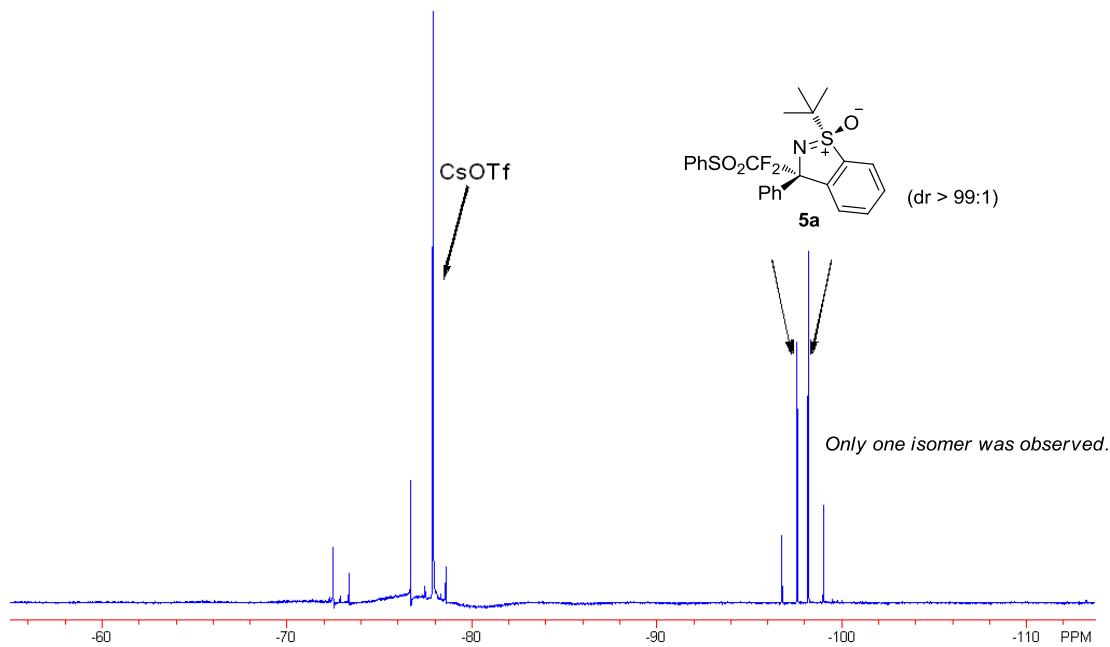

### Characterization Data:

(1*S*,3*R*)-1-(*tert*-Butyl)-3-[difluoro(phenylsulfonyl)methyl]-3-phenylbenzo[*d*]isothiazole

1-oxide (**5a**)

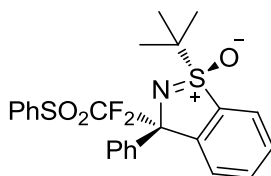

Mp: 138–140 °C.  $[\alpha]_D^{22}$   $-45.1$  ( $c$  0.80,  $\text{CHCl}_3$ ), >99:1 er. The enantiomeric ratio was determined by CHIRALPAK OD (250 × 4.6 mm), hexane / IPA= 60 / 40 (v/v), 0.7 mL/min,  $\lambda$  = 214 nm,  $t_R$  (major) = 8.69 min,  $t_R$  (minor) = 10.24 min.  $^1\text{H}$  NMR (300 MHz,  $\text{CDCl}_3$ ):  $\delta$  8.03–7.87 (m, 5H), 7.69–7.55 (m, 3H), 7.47 (t,  $J$  = 7.4 Hz, 3H), 7.26 (d,  $J$  = 7.4 Hz, 3H), 1.47 (s, 9H).  $^{19}\text{F}$  NMR (282 MHz,  $\text{CDCl}_3$ ):  $\delta$   $-97.7$  (d,  $J$  = 233.9 Hz, 1F),  $-100.0$  (d,  $J$  = 233.8 Hz, 1F).  $^{13}\text{C}$  NMR (100 MHz,  $\text{CDCl}_3$ ):  $\delta$  147.8, 138.9, 136.1, 134.9, 134.6, 133.0, 131.1, 129.9, 128.7, 128.2, 128.0, 127.5 (d,  $J$  = 5.2 Hz), 126.0 (d,  $J$  = 1.9 Hz), 123.6, 122.7 (t,  $J$  = 298.7 Hz), 80.9 (t,  $J$  = 23.5 Hz), 63.6, 24.7 (d,  $J$  = 1.4 Hz). IR (film): 3061, 1585, 1451, 1360, 1222, 1153, 1113  $\text{cm}^{-1}$ . MS (ESI,  $m/z$ ): 498.1 ( $\text{M} + \text{Na}^+$ ). Anal. Calcd for  $\text{C}_{24}\text{H}_{23}\text{F}_2\text{NO}_3\text{S}_2$ : C, 60.61; H, 4.87; N, 2.95; Found: C, 60.93; H, 4.78; N, 2.73.

(1*S*,3*R*)-1-(*tert*-Butyl)-3-[difluoro(phenylsulfonyl)methyl]-3-(*m*-tolyl)benzo[*d*]isothiazole 1-oxide (**5b**)

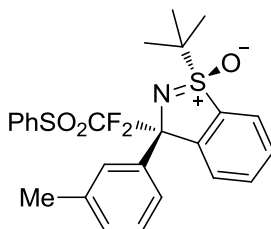

Mp: 147–149 °C.  $[\alpha]_D^{22}$   $-42.6$  ( $c$  0.75,  $\text{CHCl}_3$ ).  $^1\text{H}$  NMR (300 MHz,  $\text{CDCl}_3$ ):  $\delta$  7.99 (d,  $J$  = 7.8 Hz, 1H), 7.90 (d,  $J$  = 7.4 Hz, 2H), 7.77–7.55 (m, 5H), 7.47 (q,  $J$  = 7.0 Hz, 3H), 7.15 (t,  $J$  = 7.7 Hz, 1H), 7.03 (d,  $J$  = 7.4 Hz, 1H), 2.30 (s, 3H), 1.51 (s, 9H).  $^{19}\text{F}$  NMR (282 MHz,  $\text{CDCl}_3$ ):  $\delta$   $-97.1$  (d,  $J$  = 234.3 Hz, 1F),  $-99.8$  (d,  $J$  = 234.3 Hz, 1F).  $^{13}\text{C}$  NMR (100 MHz,  $\text{CDCl}_3$ ):  $\delta$  147.9 (d,  $J$  = 1.8 Hz), 138.8 (t,  $J$  = 2.8 Hz), 137.5, 136.1, 135.0, 134.6,

133.0, 131.1, 129.9, 129.0, 128.7, 128.3 (d,  $J = 3.7$  Hz), 127.9, 126.1 (d,  $J = 2.8$  Hz), 124.5 (d,  $J = 6.4$  Hz), 123.6, 122.8 (t,  $J = 296.9$  Hz), 80.9 (t,  $J = 21.8$  Hz), 63.7, 24.8 (d,  $J = 2.4$  Hz), 21.8. IR (film): 1736, 1449, 1349, 1224, 1113, 964, 755, 607  $\text{cm}^{-1}$ . MS (ESI,  $m/z$ ): 512.1 ( $\text{M} + \text{Na}^+$ ). HRMS (ESI): calcd. for  $\text{C}_{25}\text{H}_{25}\text{F}_2\text{NO}_3\text{S}_2$ : ( $\text{M} + \text{Na}^+$ ): 512.1136; Found: 512.1143.

(1*S*,3*R*)-1-(*tert*-Butyl)-3-[difluoro(phenylsulfonyl)methyl]-3-(*p*-tolyl)benzo[*d*]isothiazole 1-oxide (**5c**)

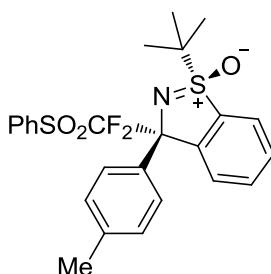

Mp: 148–150 °C.  $[\alpha]_{\text{D}}^{23} -35.9$  ( $c$  0.90,  $\text{CHCl}_3$ ).  $^1\text{H}$  NMR (300 MHz,  $\text{CDCl}_3$ ):  $\delta$  8.00 (d,  $J = 7.9$  Hz, 1H), 7.92 (d,  $J = 7.9$  Hz, 2H), 7.83 (d,  $J = 7.6$  Hz, 2H), 7.69–7.55 (m, 3H), 7.48 (t,  $J = 7.9$  Hz, 3H), 7.08 (d,  $J = 7.6$  Hz, 2H), 2.28 (s, 3H), 1.46 (s, 9H).  $^{19}\text{F}$  NMR (282 MHz,  $\text{CDCl}_3$ ):  $\delta$  -98.0 (d,  $J = 233.1$  Hz, 1F), -99.9 (d,  $J = 233.1$  Hz, 1F).  $^{13}\text{C}$  NMR (100 MHz,  $\text{CDCl}_3$ ):  $\delta$  148.2 (d,  $J = 2.6$  Hz), 138.1, 136.3, 136.2 (t,  $J = 2.6$  Hz), 135.0, 134.7, 133.2, 131.3, 129.9, 129.0, 128.9, 127.6 (d,  $J = 4.8$  Hz), 126.2 (d,  $J = 3.1$  Hz), 123.8, 122.9 (t,  $J = 295.3$  Hz), 80.9 (t,  $J = 21.4$  Hz), 63.7, 24.9 (d,  $J = 2.5$  Hz), 21.2. IR (film): 1450, 1337, 1330, 1213, 1171, 1114  $\text{cm}^{-1}$ . MS (ESI,  $m/z$ ): 512.1 ( $\text{M} + \text{Na}^+$ ). HRMS (ESI): calcd. for  $\text{C}_{25}\text{H}_{25}\text{F}_2\text{NO}_3\text{S}_2$ : ( $\text{M} + \text{H}^+$ ): 490.1317; Found: 490.1328.

(1*S*,3*R*)-1-(*tert*-Butyl)-3-(4-chlorophenyl)-3-[difluoro(phenylsulfonyl)methyl]benzo[*d*]isothiazole 1-oxide (**5d**)

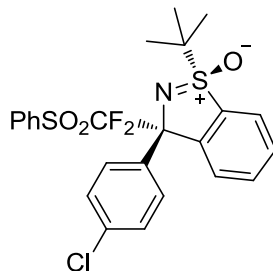

Mp: 139–141 °C.  $[\alpha]_D^{23}$   $-36.7$  ( $c$  1.00,  $\text{CHCl}_3$ ).  $^1\text{H NMR}$  (300 MHz,  $\text{CDCl}_3$ ):  $\delta$  7.96 (d,  $J$  = 8.0 Hz, 1H), 7.90 (d,  $J$  = 8.0 Hz, 4H), 7.71–7.57 (m, 3H), 7.55–7.46 (m, 3H), 7.23 (d,  $J$  = 8.5 Hz, 2H), 1.46 (s, 9H).  $^{19}\text{F NMR}$  (282 MHz,  $\text{CDCl}_3$ ):  $\delta$   $-97.9$  (d,  $J$  = 239.4 Hz, 1F),  $-100.5$  (d,  $J$  = 239.4 Hz, 1F).  $^{13}\text{C NMR}$  (100 MHz,  $\text{CDCl}_3$ ):  $\delta$  147.6 (d,  $J$  = 1.7 Hz), 137.8 (t,  $J$  = 2.6 Hz), 136.1, 135.1, 134.9, 134.5, 133.4, 131.2, 130.3, 129.2 (d,  $J$  = 5.1 Hz), 129.0, 128.3, 126.0 (d,  $J$  = 2.9 Hz), 123.9, 122.6 (t,  $J$  = 296.8 Hz), 80.6 (t,  $J$  = 21.8 Hz), 63.9, 24.9 (d,  $J$  = 2.3 Hz). IR (film): 1492, 1445, 1344, 1221, 1168, 1114, 963  $\text{cm}^{-1}$ . MS (ESI,  $m/z$ ): 532.1 ( $\text{M} + \text{Na}^+$ ). Anal. Calcd for  $\text{C}_{24}\text{H}_{22}\text{ClF}_2\text{NO}_3\text{S}_2$ : C, 56.52; H, 4.35; N, 2.75; Found: C, 56.16; H, 4.45; N, 2.55.

(1S,3R)-3-(4-Bromophenyl)-1-(tert-butyl)-3-[difluoro(phenylsulfonyl)methyl]benzo[*d*]isothiazole 1-oxide (**5e**)

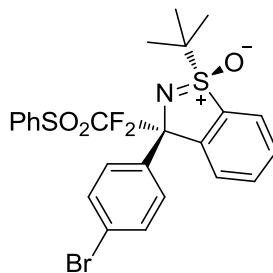

Mp: 148–150 °C.  $[\alpha]_D^{23}$   $-35.5$  ( $c$  0.90,  $\text{CHCl}_3$ ).  $^1\text{H NMR}$  (300 MHz,  $\text{CDCl}_3$ ):  $\delta$  7.95 (d,  $J$  = 7.8 Hz, 1H), 7.90 (d,  $J$  = 8.2 Hz, 2H), 7.83 (d,  $J$  = 8.0 Hz, 2H), 7.71–7.57 (m, 3H), 7.55–7.45 (m, 3H), 7.38 (d,  $J$  = 8.0 Hz, 2H), 1.46 (s, 9H).  $^{19}\text{F NMR}$  (282 MHz,  $\text{CDCl}_3$ ):  $\delta$   $-97.9$  (d,  $J$  = 238.6 Hz, 1F),  $-100.5$  (d,  $J$  = 236.3 Hz, 1F).  $^{13}\text{C NMR}$  (100 MHz,  $\text{CDCl}_3$ ):  $\delta$  147.5 (d,  $J$  = 2.3 Hz), 138.4 (t,  $J$  = 2.9 Hz), 136.0, 135.1, 134.9, 133.4, 131.3, 131.2, 130.3, 129.6 (dd,  $J$  = 5.2, 1.7 Hz), 129.0, 126.0 (d,  $J$  = 2.9 Hz), 123.9, 122.9, 122.6 (t,  $J$  =

298.3 Hz), 80.7 (t,  $J = 21.8$  Hz), 63.9, 24.9 (d,  $J = 2.3$  Hz). IR (film): 1580, 1487, 1446, 1335, 1223, 1154, 1012, 961  $\text{cm}^{-1}$ . MS (ESI,  $m/z$ ): 576.0 ( $\text{M} + \text{Na}^+$ ). HRMS (ESI): calcd. for  $\text{C}_{24}\text{H}_{22}\text{BrF}_2\text{NO}_3\text{S}_2$ : ( $\text{M} + \text{H}^+$ ): 554.0265; Found: 554.0277.

(1*S*,3*R*)-1-(*tert*-Butyl)-3-[difluoro(phenylsulfonyl)methyl]-3-(3-methoxyphenyl)benzo[*d*]isothiazole 1-oxide (**5f**)

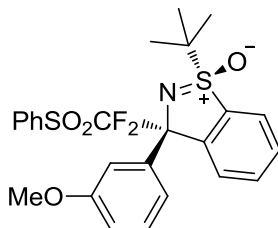

Mp: 126–128 °C.  $[\alpha]_{\text{D}}^{23} -42.7$  ( $c$  0.80,  $\text{CHCl}_3$ ).  $^1\text{H}$  NMR (300 MHz,  $\text{CDCl}_3$ ):  $\delta$  7.97 (d,  $J = 7.6$  Hz, 1H), 7.91 (d,  $J = 7.6$  Hz, 2H), 7.69–7.43 (m, 8H), 7.18 (t,  $J = 8.0$  Hz, 1H), 6.76 (dd,  $J = 8.0, 2.7$  Hz, 1H), 3.76 (s, 3H), 1.49 (s, 9H).  $^{19}\text{F}$  NMR (282 MHz,  $\text{CDCl}_3$ ):  $\delta$  -97.2 (d,  $J = 231.0$  Hz, 1F), -99.8 (d,  $J = 231.0$  Hz, 1F).  $^{13}\text{C}$  NMR (100 MHz,  $\text{CDCl}_3$ ):  $\delta$  159.2, 147.7, 140.6, 136.0, 134.9, 134.6, 133.0, 131.1, 129.9, 128.8, 128.7, 126.0 (d,  $J = 2.2$  Hz), 123.6, 122.7 (t,  $J = 300.0$  Hz), 119.7 (d,  $J = 8.0$  Hz), 113.7, 113.6, 80.9 (t,  $J = 22.1$  Hz), 63.6, 55.2, 24.7 (d,  $J = 1.6$  Hz). IR (film): 1736, 1604, 1584, 1450, 1347, 1223, 1113, 755  $\text{cm}^{-1}$ . MS (ESI,  $m/z$ ): 528.1 ( $\text{M} + \text{Na}^+$ ). HRMS (ESI): calcd. for  $\text{C}_{25}\text{H}_{25}\text{F}_2\text{NO}_4\text{S}_2$ : ( $\text{M} + \text{H}^+$ ): 506.1266; Found: 506.1288.

(1*S*,3*R*)-1-(*tert*-Butyl)-3-[difluoro(phenylsulfonyl)methyl]-3-(4-methoxyphenyl)benzo[*d*]isothiazole 1-oxide (**5g**)

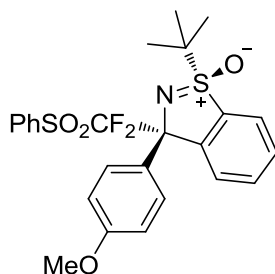

Mp: 149–151 °C.  $[\alpha]_{\text{D}}^{23} -28.4$  ( $c$  0.80,  $\text{CHCl}_3$ ).  $^1\text{H}$  NMR (300 MHz,  $\text{CDCl}_3$ ):  $\delta$  7.98 (d,  $J$

= 8.0 Hz, 1H), 7.91 (d,  $J = 7.6$  Hz, 2H), 7.85 (d,  $J = 8.0$  Hz, 2H), 7.69–7.55 (m, 3H), 7.48 (t,  $J = 7.5$  Hz, 3H), 6.78 (d,  $J = 8.0$  Hz, 2H), 3.74 (s, 3H), 1.47 (s, 9H).  $^{19}\text{F}$  NMR (282 MHz,  $\text{CDCl}_3$ ):  $\delta$  -97.9 (d,  $J = 233.0$  Hz, 1F), -100.2 (d,  $J = 233.1$  Hz, 1F).  $^{13}\text{C}$  NMR (100 MHz,  $\text{CDCl}_3$ ):  $\delta$  159.3, 148.1, 136.1, 134.7, 134.5, 132.9, 130.9, 130.8 (t,  $J = 2.9$  Hz), 129.7, 128.8 (d,  $J = 5.1$  Hz), 128.6, 125.8 (d,  $J = 3.3$  Hz), 123.5, 122.6 (t,  $J = 297.8$  Hz), 113.2, 80.5 (t,  $J = 21.8$  Hz), 63.4, 55.1, 24.6 (d,  $J = 2.4$  Hz). IR (film): 1608, 1510, 1450, 1344, 1253, 1218, 1181, 1114  $\text{cm}^{-1}$ . MS (ESI,  $m/z$ ): 528.1 ( $\text{M} + \text{Na}^+$ ). HRMS (ESI): calcd. for  $\text{C}_{25}\text{H}_{25}\text{F}_2\text{NO}_4\text{S}_2$ : ( $\text{M} + \text{Na}^+$ ): 528.1085; Found: 528.1102.

(1*S*,3*R*)-1-(*tert*-Butyl)-3-[difluoro(phenylsulfonyl)methyl]-3-[4-(trifluoromethyl)phenyl]benzo[*d*]isothiazole 1-oxide (**5h**)

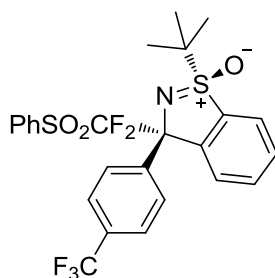

White solid. M.p.: 154–156 °C.  $[\alpha]_{\text{D}}^{29} = -35.5$  ( $c = 0.95$ ,  $\text{CHCl}_3$ ).  $^1\text{H}$  NMR (300 MHz,  $\text{CDCl}_3$ ):  $\delta$  8.08 (d,  $J = 7.8$  Hz, 2H), 7.98 (d,  $J = 7.5$  Hz, 1H), 7.95 (d,  $J = 7.5$  Hz, 2H), 7.71–7.59 (m, 4H), 7.56–7.46 (m, 4H), 1.49 (s, 9H).  $^{19}\text{F}$  NMR (282 MHz,  $\text{CDCl}_3$ ):  $\delta$  -61.7 (s, 3F), -96.2 (d,  $J = 234.9$  Hz, 1F), -99.3 (d,  $J = 235.8$  Hz, 1F).  $^{13}\text{C}$  NMR (100 MHz,  $\text{CDCl}_3$ ):  $\delta$  147.0, 143.1, 135.8, 135.1, 134.8, 133.3, 131.0, 130.7, 130.3 (q,  $J = 32.1$  Hz), 128.8, 128.0 (d,  $J = 5.1$  Hz), 125.9 (d,  $J = 2.9$  Hz), 124.9 (d,  $J = 3.6$  Hz), 124.1 (q,  $J = 270.6$  Hz), 123.8, 122.4 (t,  $J = 296$  Hz), 80.6 (t,  $J = 21.9$  Hz), 63.8, 24.6. IR (KBr): 3073, 2981, 1616, 1450, 1316, 1224, 1124, 1045, 963, 828, 8005, 605, 555  $\text{cm}^{-1}$ . MS (ESI,  $m/z$ ): 566 ( $[\text{M} + \text{Na}]^+$ ). HRMS (ESI,  $m/z$ ): Calcd. for  $\text{C}_{25}\text{H}_{22}\text{F}_5\text{NNaO}_3\text{S}_2$  ( $[\text{M} + \text{Na}]^+$ ): 566.0859; Found: 566.0863.

(1*S*,3*R*)-3-(6-Bromonaphthalen-2-yl)-1-(*tert*-butyl)-3-[difluoro(phenylsulfonyl)methyl]benzo[*d*]isothiazole 1-oxide (**5i**)

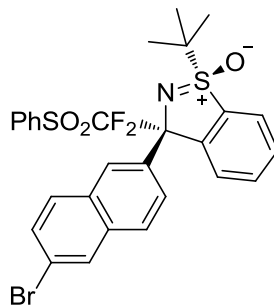

Mp: 100–103 °C.  $[\alpha]_D^{20}$   $-36.0$  ( $c$  0.80,  $\text{CHCl}_3$ ).  $^1\text{H}$  NMR (300 MHz,  $\text{CDCl}_3$ ):  $\delta$  8.40 (s, 1H), 8.06 (t,  $J = 7.9$  Hz, 2H), 7.90 (s, 1H), 7.87 (d,  $J = 7.4$  Hz, 2H), 7.69 (t,  $J = 8.3$  Hz, 2H), 7.65–7.44 (m, 5H), 7.40 (t,  $J = 7.9$  Hz, 2H), 1.52 (s, 9H).  $^{19}\text{F}$  NMR (282 MHz,  $\text{CDCl}_3$ ):  $\delta$   $-96.6$  (d,  $J = 234.3$  Hz, 1F),  $-99.6$  (d,  $J = 234.2$  Hz, 1F).  $^{13}\text{C}$  NMR (100 MHz,  $\text{CDCl}_3$ ):  $\delta$  147.3 (d,  $J = 2.1$  Hz), 136.8 (t,  $J = 2.1$  Hz), 135.6, 134.8, 134.6, 133.8, 133.1, 131.2, 130.9, 130.5, 129.9, 129.2, 129.1, 128.6, 127.3 (d,  $J = 2.2$  Hz), 126.5, 125.9 (d,  $J = 2.8$  Hz), 125.8, 123.7, 122.5 (t,  $J = 299.9$  Hz), 120.3, 80.8 (t,  $J = 21.6$  Hz), 63.6, 24.6 (d,  $J = 2.3$  Hz). IR (film): 1734, 1585, 1449, 1348, 1223, 1154, 1113, 1062  $\text{cm}^{-1}$ . MS (ESI,  $m/z$ ): 626.1 ( $\text{M} + \text{Na}^+$ ). HRMS (ESI): calcd. for  $\text{C}_{28}\text{H}_{24}\text{BrF}_2\text{NO}_3\text{S}_2$ : ( $\text{M} + \text{Na}^+$ ): 626.0241; Found: 626.0272.

(1*S*,3*R*)-1-(*tert*-Butyl)-3-[difluoro(phenylsulfonyl)methyl]-3-[(*E*)-styryl]benzo[*d*]isothiazole 1-oxide (**5j**)

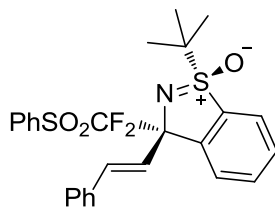

Mp: 145–147 °C.  $[\alpha]_D^{23}$   $-34.6$  ( $c$  1.00,  $\text{CHCl}_3$ ).  $^1\text{H}$  NMR (300 MHz,  $\text{CDCl}_3$ ):  $\delta$  8.06 (d,  $J = 7.7$  Hz, 2H), 7.73 (d,  $J = 7.6$  Hz, 2H), 7.65–7.46 (m, 5H), 7.33 (d,  $J = 7.6$  Hz, 2H), 7.28–7.14 (m, 3H), 6.91 (d,  $J = 15.3$  Hz, 1H), 6.72 (dd,  $J = 15.2, 3.3$  Hz, 1H), 1.48 (s, 9H).  $^{19}\text{F}$  NMR (282 MHz,  $\text{CDCl}_3$ ):  $\delta$   $-100.9$  (d,  $J = 235.2$  Hz, 1F),  $-105.4$  (d,  $J = 233.0$  Hz, 1F).  $^{13}\text{C}$  NMR (100 MHz,  $\text{CDCl}_3$ ):  $\delta$  146.8 (d,  $J = 3.0$  Hz), 136.3, 135.6, 134.8, 134.2, 133.1, 131.6, 131.2, 130.0, 128.7, 128.2, 127.7, 127.1, 126.0 (dd,  $J = 3.7, 2.4$  Hz), 125.4



(d,  $J = 4.3$  Hz), 124.1, 122.3 (t,  $J = 298.1$  Hz), 80.4 (t,  $J = 21.7$ , Hz), 63.4, 24.6 (d,  $J = 2.3$  Hz). IR (film): 1581, 1449, 1341, 1222, 1156, 1113, 1017, 600  $\text{cm}^{-1}$ . MS (ESI,  $m/z$ ): 524.1 ( $M + \text{Na}^+$ ). Anal. Calcd for  $\text{C}_{26}\text{H}_{25}\text{F}_2\text{NO}_3\text{S}_2$ : C, 62.26; H, 5.02; N, 2.79; Found: C, 61.96; H, 5.12; N, 2.62.

(1*S*,3*R*)-1-(*tert*-Butyl)-3-[difluoro(phenylsulfonyl)methyl]-3-isopropylbenzo[*d*]isothiazole 1-oxide (**5k**)

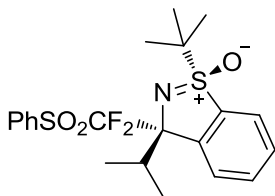

Mp: 58–60 °C.  $[\alpha]_{\text{D}}^{23} -25.8$  ( $c$  0.60,  $\text{CHCl}_3$ ).  $^1\text{H}$  NMR (300 MHz,  $\text{CDCl}_3$ ):  $\delta$  8.00 (d,  $J = 8.0$  Hz, 2H), 7.85 (d,  $J = 7.6$  Hz, 1H), 7.72 (t,  $J = 7.6$  Hz, 1H), 7.65 (t,  $J = 7.6$  Hz, 1H), 7.62–7.50 (m, 4H), 3.17–3.05 (m, 1H), 1.39 (s, 9H), 1.02 (dd,  $J = 6.6, 3.6$  Hz, 3H), 0.91 (d,  $J = 7.0$  Hz, 3H).  $^{19}\text{F}$  NMR (282 MHz,  $\text{CDCl}_3$ ):  $\delta$  -92.8 (d,  $J = 240.4$  Hz, 1F), -94.2 (d,  $J = 240.4$  Hz, 1F).  $^{13}\text{C}$  NMR (100 MHz,  $\text{CDCl}_3$ ):  $\delta$  145.2 (d,  $J = 3.5$  Hz), 136.9, 135.6, 134.7, 132.3, 130.8, 129.9, 128.9, 126.3 (d,  $J = 3.0$  Hz), 123.7, 123.6 (t,  $J = 295.7$  Hz), 84.8 (dd,  $J = 20.1, 16.5$  Hz), 63.7, 34.9, 24.7, 19.1 (d,  $J = 2.9$  Hz), 18.6 (d,  $J = 7.5$  Hz). IR (film): 2973, 1449, 1349, 1222, 1157, 1104, 754, 589  $\text{cm}^{-1}$ . MS (ESI,  $m/z$ ): 464.1 ( $M + \text{Na}^+$ ). HRMS (ESI): calcd. for  $\text{C}_{21}\text{H}_{25}\text{F}_2\text{NO}_3\text{S}_2$ : ( $M + \text{Na}^+$ ): 464.1136; Found: 464.1152.

(1*S*,3*R*)-1-(*tert*-Butyl)-3-[difluoro(phenylsulfonyl)methyl]-5,6-dimethyl-3-phenylbenzo[*d*]isothiazole 1-oxide (**5l**)

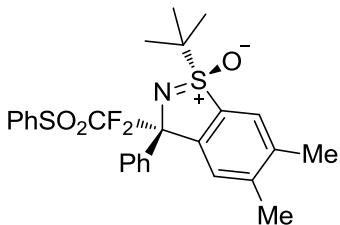

Mp: 95–97 °C.  $[\alpha]_{\text{D}}^{23} -11.5$  ( $c$  0.90,  $\text{CHCl}_3$ ).  $^1\text{H}$  NMR (300 MHz,  $\text{CDCl}_3$ ):  $\delta$  7.90–7.78

(m, 4H), 7.63 (s, 1H), 7.52 (t,  $J = 7.7$  Hz, 1H), 7.38 (t,  $J = 7.7$  Hz, 2H), 7.31 (s, 1H), 7.22–7.10 (m, 3H), 2.26 (s, 3H), 2.19 (s, 3H), 1.37 (s, 9H).  $^{19}\text{F}$  NMR (282 MHz,  $\text{CDCl}_3$ ):  $\delta$  -97.4 (d,  $J = 238.9$  Hz, 1F), -99.9 (d,  $J = 238.8$  Hz, 1F).  $^{13}\text{C}$  NMR (100 MHz,  $\text{CDCl}_3$ ):  $\delta$  145.9, 143.1, 139.4, 136.2, 134.5, 132.6, 131.2, 128.4, 128.04, 128.02, 127.5, 127.4 (d,  $J = 1.3$  Hz), 126.6 (d,  $J = 2.9$  Hz), 123.9, 122.9 (t,  $J = 295.4$  Hz), 80.5 (t,  $J = 22.4$  Hz), 63.4, 24.8 (d,  $J = 2.4$  Hz), 20.9, 20.1. IR (film): 1449, 1347, 1224, 1164, 1113, 1052, 962, 686  $\text{cm}^{-1}$ . MS (ESI,  $m/z$ ): 526.1 ( $\text{M} + \text{Na}^+$ ). HRMS (ESI): calcd. for  $\text{C}_{26}\text{H}_{27}\text{F}_2\text{NO}_3\text{S}_2$ : ( $\text{M} + \text{H}^+$ ): 504.1473; Found: 504.1485.

(1*S*,3*R*)-1-(*tert*-Butyl)-3-[difluoro(phenylsulfonyl)methyl]-5,6-dimethyl-3-(*m*-tolyl)benzo [*d*]isothiazole 1-oxide (**5m**)

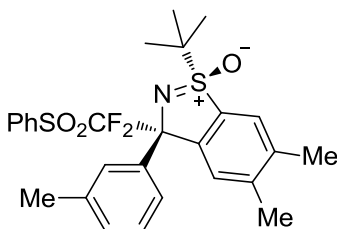

White solid. Mp: 143–144 °C.  $[\alpha]_{\text{D}}^{28} = -11.2$  ( $c$  0.20,  $\text{CHCl}_3$ ). IR (KBr): 2964, 2926, 1604, 1448, 1341, 1367, 1182, 1112, 958, 724, 687, 634, 597, 561  $\text{cm}^{-1}$ .  $^1\text{H}$  NMR (300 MHz,  $\text{CDCl}_3$ ):  $\delta$  7.89 (d,  $J = 7.5$  Hz, 2H), 7.73–7.67 (m, 3H), 7.62–7.56 (m, 1H), 7.47–7.39 (m, 3H), 7.17–7.15 (m, 1H), 7.01 (d,  $J = 7.2$  Hz, 1H), 2.34 (s, 3H), 2.29 (s, 3H), 2.28 (s, 3H), 1.49 (s, 9H).  $^{19}\text{F}$  NMR (282 MHz,  $\text{CDCl}_3$ ):  $\delta$  -95.9 (d,  $J = 232.7$  Hz, 1F), -99.0 (d,  $J = 231.8$  Hz, 1F).  $^{13}\text{C}$  NMR (100 MHz,  $\text{CDCl}_3$ ):  $\delta$  145.9, 142.9, 139.3 (d,  $J = 1.7$  Hz), 139.2, 137.4, 136.2, 134.4, 132.6, 131.1, 128.8, 128.5, 128.1 (d,  $J = 4.3$  Hz), 127.7, 126.6 (d,  $J = 2.6$  Hz), 124.3 (d,  $J = 6.9$  Hz), 123.8, 122.9 (t,  $J = 294.7$  Hz), 80.5 (t,  $J = 21.6$  Hz), 63.3, 24.8 (d,  $J = 2.6$  Hz), 21.7, 20.8, 20.0. MS (ESI,  $m/z$ ): 518 ( $[\text{M} + \text{H}]^+$ ). HRMS (ESI,  $m/z$ ): Calcd. for  $\text{C}_{27}\text{H}_{30}\text{F}_2\text{NO}_3\text{S}_2$  ( $[\text{M} + \text{H}]^+$ ): 518.1635; found: 518.1614.

(1*S*,3*R*)-1-(*tert*-Butyl)-3-(4-chlorophenyl)-3-[difluoro(phenylsulfonyl)methyl]-5,6-dimeth

ylbenzo[*d*]isothiazole 1-oxide (**5n**)

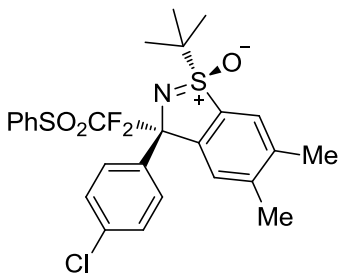

Mp: 159–161 °C.  $[\alpha]_D^{22}$   $-1.0$  (*c* 0.75, CHCl<sub>3</sub>). <sup>1</sup>H NMR (300 MHz, CDCl<sub>3</sub>):  $\delta$  7.86–7.78 (m, 4H), 7.56 (t, *J* = 7.4 Hz, 2H), 7.40 (t, *J* = 7.8 Hz, 2H), 7.32 (s, 1H), 7.14 (d, *J* = 8.2 Hz, 2H), 2.27 (s, 3H), 2.21 (s, 3H), 1.36 (s, 9H). <sup>19</sup>F NMR (282 MHz, CDCl<sub>3</sub>):  $\delta$   $-97.6$  (d, *J* = 231.8 Hz, 1F),  $-100.4$  (d, *J* = 231.9 Hz, 1F). <sup>13</sup>C NMR (100 MHz, CDCl<sub>3</sub>):  $\delta$  145.4, 143.3, 139.6, 138.2, 136.1, 134.6, 134.1, 132.5, 131.0, 129.0 (d, *J* = 5.5 Hz), 128.8, 128.0, 126.3 (d, *J* = 2.9 Hz), 123.9, 122.6 (t, *J* = 298.1 Hz), 80.1 (t, *J* = 21.9 Hz), 63.4, 24.7 (d, *J* = 1.8 Hz), 20.8, 20.0. IR (film): 1492, 1449, 1348, 1224, 1165, 964, 686 cm<sup>-1</sup>. MS (ESI, *m/z*): 560.1 (M + Na<sup>+</sup>). HRMS (ESI): calcd. for C<sub>26</sub>H<sub>26</sub>ClF<sub>2</sub>NO<sub>3</sub>S<sub>2</sub>: (M + Na<sup>+</sup>): 560.0903; Found: 560.0898.

(1*S*,3*R*)-1-(*tert*-Butyl)-3-(difluoro(phenylsulfonyl)methyl)-3-(3-methoxyphenyl)-5,6-dimethylbenzo[*d*]isothiazole 1-oxide (**5o**)

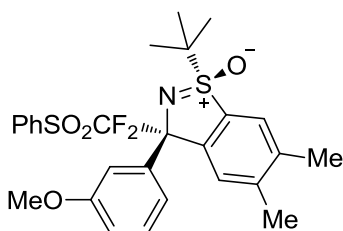

Mp: 149–151 °C.  $[\alpha]_D^{21}$   $-6.8$  (*c* 0.75, CHCl<sub>3</sub>). <sup>1</sup>H NMR (300 MHz, CDCl<sub>3</sub>):  $\delta$  7.91 (d, *J* = 7.7 Hz, 2H), 7.66 (s, 1H), 7.60 (t, *J* = 7.3 Hz, 1H), 7.53 (d, *J* = 7.7 Hz, 1H), 7.45 (t, *J* = 7.7 Hz, 3H), 7.40 (s, 1H), 7.18 (t, *J* = 8.1 Hz, 1H), 6.75 (dd, *J* = 8.2, 2.5 Hz, 1H), 3.76 (s, 3H), 2.33 (s, 3H), 2.28 (s, 3H), 1.48 (s, 9H). <sup>19</sup>F NMR (282 MHz, CDCl<sub>3</sub>):  $\delta$   $-96.7$  (d, *J* = 229.8 Hz, 1F),  $-99.5$  (d, *J* = 229.8 Hz, 1F). <sup>13</sup>C NMR (100 MHz, CDCl<sub>3</sub>):  $\delta$  159.1, 145.7, 142.9, 140.9, 139.3, 136.1, 134.4, 132.4, 131.1, 128.8, 128.5, 126.5, 123.7, 122.8 (t, *J* =

298.8 Hz), 119.5 (d,  $J = 7.5$  Hz), 113.5, 113.4 (d,  $J = 4.5$  Hz), 80.4 (t,  $J = 21.4$  Hz), 63.3, 55.1, 24.7 (d,  $J = 2.2$  Hz), 20.7, 19.9. IR (film): 1600, 1450, 1351, 1223, 1162, 1123, 1055, 968  $\text{cm}^{-1}$ . MS (ESI,  $m/z$ ): 556.1 ( $M + \text{Na}^+$ ). HRMS (ESI): calcd. for  $\text{C}_{27}\text{H}_{29}\text{F}_2\text{NO}_4\text{S}_2$ : ( $M + \text{Na}^+$ ): 556.1398; Found: 556.1407.

(1*S*,3*R*)-1-(*tert*-Butyl)-3-[difluoro(phenylsulfonyl)methyl]-3-phenyl-3,5,6,7-tetrahydroindeno[5,6-*d*]isothiazole 1-oxide (**5p**)

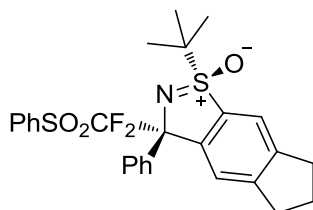

Mp: 85–88 °C.  $[\alpha]_{\text{D}}^{22} -10.5$  ( $c$  0.95,  $\text{CHCl}_3$ ).  $^1\text{H}$  NMR (300 MHz,  $\text{CDCl}_3$ ):  $\delta$  7.87 (d,  $J = 7.4$  Hz, 2H), 7.82 (d,  $J = 7.8$  Hz, 2H), 7.67 (s, 1H), 7.52 (t,  $J = 7.4$  Hz, 1H), 7.37 (t,  $J = 7.8$  Hz, 3H), 7.23–7.10 (m, 3H), 2.92–2.70 (m, 4H), 2.14–1.92 (m, 2H), 1.38 (s, 9H).  $^{19}\text{F}$  NMR (282 MHz,  $\text{CDCl}_3$ ):  $\delta$  -97.4 (d,  $J = 232.4$  Hz, 1F), -99.8 (d,  $J = 233.8$  Hz, 1F).  $^{13}\text{C}$  NMR (100 MHz,  $\text{CDCl}_3$ ):  $\delta$  151.3, 147.4, 146.8, 139.6, 136.3, 134.6, 133.2, 131.0, 128.7, 127.9, 127.5, 127.4, 122.9 (t,  $J = 297.6$  Hz), 121.5 (d,  $J = 2.9$  Hz), 118.9, 80.1 (t,  $J = 21.3$  Hz), 63.3, 32.9, 32.3, 25.9, 24.7 (d,  $J = 1.4$  Hz). IR (film): 2968, 1448, 1347, 1223, 1168, 1112, 1048, 964  $\text{cm}^{-1}$ . MS (ESI,  $m/z$ ): 538.2 ( $M + \text{Na}^+$ ). HRMS (ESI): calcd. for  $\text{C}_{27}\text{H}_{27}\text{F}_2\text{NO}_3\text{S}_2$ : ( $M + \text{H}^+$ ): 516.1473; Found: 516.1487.

(1*S*,3*R*)-1-(*tert*-Butyl)-3-[difluoro(phenylsulfonyl)methyl]-3-(*m*-tolyl)-3,5,6,7-tetrahydroindeno[5,6-*d*]isothiazole 1-oxide (**5q**)

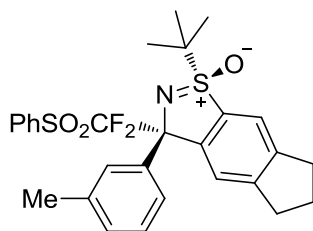

Mp: 92–95 °C.  $[\alpha]_D^{22}$   $-8.5$  ( $c$  0.80,  $\text{CHCl}_3$ ).  $^1\text{H}$  NMR (300 MHz,  $\text{CDCl}_3$ ):  $\delta$  7.81 (d,  $J$  = 7.5 Hz, 2H), 7.64 (t,  $J$  = 7.9 Hz, 3H), 7.51 (t,  $J$  = 7.4 Hz, 1H), 7.35 (t,  $J$  = 7.7 Hz, 3H), 7.07 (t,  $J$  = 7.9 Hz, 1H), 6.93 (d,  $J$  = 7.4 Hz, 1H), 2.92–2.70 (m, 4H), 2.21 (s, 3H), 2.13–1.93 (m, 2H), 1.41 (s, 9H).  $^{19}\text{F}$  NMR (282 MHz,  $\text{CDCl}_3$ ):  $\delta$   $-96.5$  (d,  $J$  = 232.7 Hz, 1F),  $-99.6$  (d,  $J$  = 234.7 Hz, 1F).  $^{13}\text{C}$  NMR (100 MHz,  $\text{CDCl}_3$ ):  $\delta$  151.2, 147.2, 146.9, 139.3, 137.4, 136.2, 134.4, 133.2, 131.0, 128.8, 128.5, 128.1 (d,  $J$  = 4.6 Hz), 127.8, 124.3 (d,  $J$  = 6.8 Hz), 123.0 (t,  $J$  = 298.4 Hz), 121.5 (d,  $J$  = 3.0 Hz), 118.8, 80.1 (t,  $J$  = 21.4 Hz), 63.4, 32.9, 32.3, 25.9, 24.8 (d,  $J$  = 2.3 Hz), 21.8. IR (film): 2968, 1449, 1348, 1223, 1167, 1116, 964, 597  $\text{cm}^{-1}$ . MS (ESI,  $m/z$ ): 552.2 ( $\text{M} + \text{Na}^+$ ). HRMS (ESI): calcd. for  $\text{C}_{28}\text{H}_{29}\text{F}_2\text{NO}_3\text{S}_2$ : ( $\text{M} + \text{Na}^+$ ): 552.1449; Found: 552.1454.

(1*S*,3*R*)-1-(*tert*-Butyl)-3-[difluoro(phenylsulfonyl)methyl]-3-(3-methoxyphenyl)-3,5,6,7-tetrahydroindeno[5,6-*d*]isothiazole 1-oxide (**5r**)

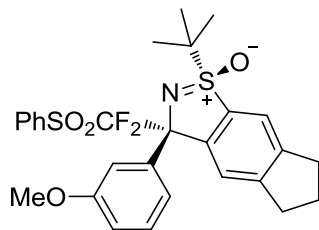

Mp: 83–86 °C.  $[\alpha]_D^{21}$   $-4.7$  ( $c$  0.70,  $\text{CHCl}_3$ ).  $^1\text{H}$  NMR (300 MHz,  $\text{CDCl}_3$ ):  $\delta$  7.91 (d,  $J$  = 7.7 Hz, 2H), 7.70 (s, 1H), 7.60 (t,  $J$  = 7.3 Hz, 1H), 7.53 (d,  $J$  = 8.1 Hz, 1H), 7.45 (t,  $J$  = 7.2 Hz, 4H), 7.17 (t,  $J$  = 8.2 Hz, 1H), 6.75 (d,  $J$  = 8.1 Hz, 1H), 3.76 (s, 3H), 3.01–2.78 (m, 4H), 2.22–2.00 (m, 2H), 1.48 (s, 9H).  $^{19}\text{F}$  NMR (282 MHz,  $\text{CDCl}_3$ ):  $\delta$   $-96.6$  (d,  $J$  = 234.5 Hz, 1F),  $-99.5$  (d,  $J$  = 234.6 Hz, 1F).  $^{13}\text{C}$  NMR (100 MHz,  $\text{CDCl}_3$ ):  $\delta$  159.2, 151.3, 147.3, 146.8, 141.1, 136.2, 134.4, 133.2, 131.1, 128.8, 128.6, 123.0 (t,  $J$  = 300.4 Hz), 121.5 (d,  $J$  = 3.3 Hz), 119.5 (d,  $J$  = 7.7 Hz), 118.8, 113.5, 113.4, 80.1 (t,  $J$  = 21.7 Hz), 63.4, 55.2, 32.9, 32.3, 25.9, 24.8 (d,  $J$  = 2.2 Hz). IR (film): 2960, 1601, 1450, 1347, 1222, 1167, 1116, 1049  $\text{cm}^{-1}$ . MS (ESI,  $m/z$ ): 568.2 ( $\text{M} + \text{Na}^+$ ). HRMS (ESI): calcd. for  $\text{C}_{28}\text{H}_{29}\text{F}_2\text{NO}_4\text{S}_2$ : ( $\text{M} + \text{Na}^+$ ): 568.1398; Found: 568.1393.

(1*S*,3*R*)-1-(*tert*-Butyl)-3-[difluoro(phenylsulfonyl)methyl]-5,6-dimethoxy-3-phenylbenzo[d]isothiazole 1-oxide (**5s**)

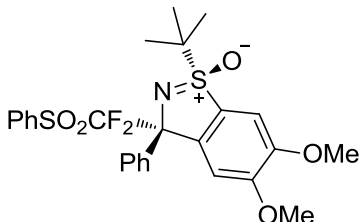

Mp: 135–137 °C.  $[\alpha]_D^{22}$   $-29.9$  ( $c$  0.85,  $\text{CHCl}_3$ ).  $^1\text{H}$  NMR (300 MHz,  $\text{CDCl}_3$ ):  $\delta$  7.92 (t,  $J$  = 7.3 Hz, 4H), 7.62 (t,  $J$  = 7.8 Hz, 1H), 7.47 (t,  $J$  = 7.9 Hz, 2H), 7.35–7.20 (m, 4H), 6.98 (s, 1H), 3.96 (s, 3H), 3.83 (s, 3H), 1.45 (s, 9H).  $^{19}\text{F}$  NMR (282 MHz,  $\text{CDCl}_3$ ):  $\delta$   $-97.2$  (d,  $J$  = 233.4 Hz, 1F),  $-99.4$  (d,  $J$  = 233.3 Hz, 1F).  $^{13}\text{C}$  NMR (100 MHz,  $\text{CDCl}_3$ ):  $\delta$  153.4, 150.7, 141.9, 139.3, 136.1, 134.6, 131.1, 128.7, 128.1, 127.2, 127.1, 126.0, 122.9 (t,  $J$  = 297.8 Hz), 107.1, 104.4, 80.4 (t,  $J$  = 21.4 Hz), 63.4, 56.4, 56.3, 27.8 (d,  $J$  = 2.3 Hz). IR (film): 1585, 1501, 1449, 1348, 1279, 1218, 1168  $\text{cm}^{-1}$ . MS (ESI,  $m/z$ ): 558.1 ( $\text{M} + \text{Na}^+$ ). HRMS (ESI): calcd. for  $\text{C}_{26}\text{H}_{27}\text{F}_2\text{NO}_5\text{S}_2$ : ( $\text{M} + \text{Na}^+$ ): 558.1191; Found: 558.1193.

(1*S*,3*R*)-1-(*tert*-Butyl)-3-[difluoro(phenylsulfonyl)methyl]-5,6-dimethoxy-3-(3-methoxyphenyl)benzo[d]isothiazole 1-oxide (**5t**)

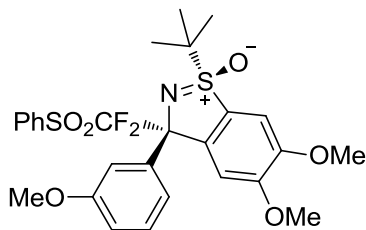

Mp: 81–83 °C.  $[\alpha]_D^{21}$   $-21.2$  ( $c$  0.80,  $\text{CHCl}_3$ ).  $^1\text{H}$  NMR (300 MHz,  $\text{CDCl}_3$ ):  $\delta$  7.91 (d,  $J$  = 7.6 Hz, 2H), 7.61 (t,  $J$  = 7.6 Hz, 1H), 7.53–7.42 (m, 4H), 7.28 (s, 1H), 7.18 (t,  $J$  = 8.0 Hz, 1H), 6.98 (s, 1H), 6.76 (dd,  $J$  = 8.0, 2.5 Hz, 1H), 3.94 (s, 3H), 3.85 (s, 3H), 3.76 (s, 3H), 1.46 (s, 9H).  $^{19}\text{F}$  NMR (282 MHz,  $\text{CDCl}_3$ ):  $\delta$   $-96.5$  (d,  $J$  = 234.8 Hz, 1F),  $-99.1$  (d,  $J$  =

234.9 Hz, 1F).  $^{13}\text{C}$  NMR (100 MHz,  $\text{CDCl}_3$ ):  $\delta$  159.3, 153.4, 150.8, 141.8, 141.0 (t,  $J = 3.0$  Hz), 136.1, 134.5, 131.1, 128.9, 128.6, 126.0, 122.9 (t,  $J = 297.5$  Hz), 119.2 (d,  $J = 7.2$  Hz), 113.5, 113.4, 107.2, 104.5, 80.4 (t,  $J = 21.1$  Hz), 63.5, 56.4, 56.3, 55.2, 24.8 (d,  $J = 1.5$  Hz). IR (film): 1601, 1500, 1348, 1279, 1217, 1170, 1056  $\text{cm}^{-1}$ . MS (ESI,  $m/z$ ): 588.1 ( $\text{M} + \text{Na}^+$ ). HRMS (ESI): calcd. for  $\text{C}_{27}\text{H}_{29}\text{F}_2\text{NO}_6\text{S}_2$ : ( $\text{M} + \text{Na}^+$ ): 588.1297; Found: 588.1294.

(1*S*,3*R*)-1-(*tert*-Butyl)-3-[difluoro(phenylsulfonyl)methyl]-6-methyl-3-phenylbenzo[*d*]isothiazole 1-oxide and (1*S*,3*R*)-1-(*tert*-butyl)-3-[difluoro(phenylsulfonyl)methyl]-5-methyl-3-phenylbenzo[*d*]isothiazole 1-oxide (**5u**)

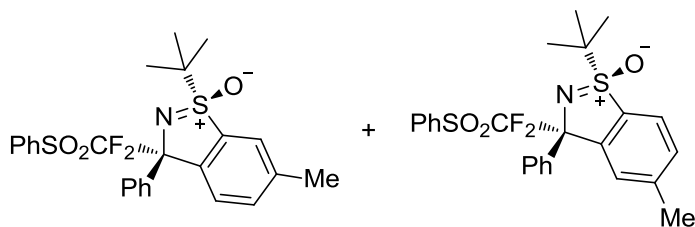

A mixture of two inseparable regio-isomers.  $[\alpha]_{\text{D}}^{28} -24.4$  ( $c$  0.95,  $\text{CHCl}_3$ ).  $^1\text{H}$  NMR (300 MHz,  $\text{CDCl}_3$ ):  $\delta$  8.00–7.83 (m, 4.54H), 7.75 (s, 0.46H), 7.61 (t,  $J = 7.5$  Hz, 1H), 7.56–7.17 (m, 7H), 2.44 (s, 1.38H), 2.38 (s, 1.62H), 1.47 (s, 4.86H), 1.44 (s, 4.14H).  $^{19}\text{F}$  NMR (282 MHz,  $\text{CDCl}_3$ ):  $\delta$  -97.4 (d,  $J = 233.9$  Hz, 0.46F), -97.7 (d,  $J = 234.2$  Hz, 0.54F), -99.9 (d,  $J = 234.2$  Hz, 0.46F), -100.0 (d,  $J = 234.1$  Hz, 0.54F). MS (ESI,  $m/z$ ): 512.4 ( $\text{M} + \text{Na}^+$ ). HRMS (ESI): calcd. for  $\text{C}_{25}\text{H}_{25}\text{F}_2\text{NO}_3\text{S}_2$ : ( $\text{M} + \text{Na}^+$ ): 512.1136; Found: 512.1139.

### 3.2 Synthesis of Cyclic Sulfinamides

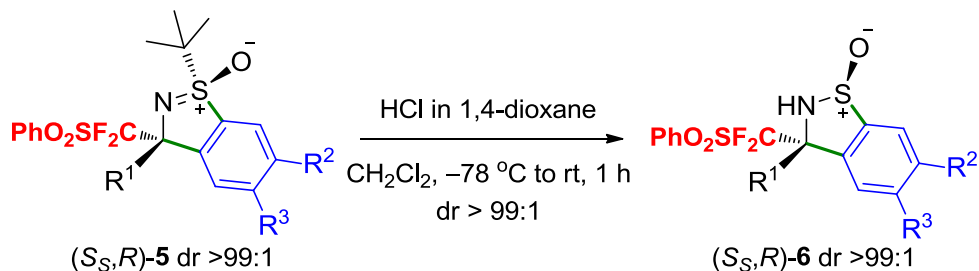

### Typical Procedures:

To a solution of (*Ss,R*)-**5a** ( $R^1 = \text{Ph}$ ;  $R^2, R^3 = \text{H}$ ) (3.92 g, 8.25 mmol) in  $\text{CH}_2\text{Cl}_2$  (40 mL) was added HCl (2.5 M in 1,4-dioxane, 66 mL, 165 mmol) at  $-78^\circ\text{C}$ . Then the reaction mixture was allowed to warm up to room temperature in 1 h. The reaction mixture was diluted with water (20 mL) and treated with saturated  $\text{NaHCO}_3$  solution (200 mL). The aqueous phase was extracted with ethyl acetate (40 mL  $\times$  3), and the combined organic phases were washed with brine (40 mL) and dried over  $\text{Na}_2\text{SO}_4$ . The volatile solvents were removed under vacuum, and the residue was purified by flash column chromatography (silica gel; ethyl acetate/petroleum ether = 1:3 v/v) to give cyclic sulfinamide (*Ss,R*)-**6a** ( $R^1 = \text{Ph}$ ;  $R^2, R^3 = \text{H}$ ) as a white solid (3.310 g, 96% yield).

### Characterization Data:

(1*S*,3*R*)-3-[Difluoro(phenylsulfonyl)methyl]-3-phenyl-2,3-dihydrobenzo[*d*]isothiazole 1-oxide (**6a**)

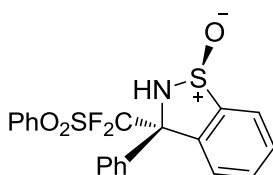

Mp: 165–167  $^\circ\text{C}$ .  $[\alpha]_D^{26} -90.4$  ( $c$  1.00,  $\text{CHCl}_3$ ).  $^1\text{H NMR}$  (300 MHz,  $\text{CDCl}_3$ ):  $\delta$  7.91 (d,  $J = 6.0$  Hz, 2H), 7.87–7.76 (m, 3H), 7.70 (t,  $J = 7.1$  Hz, 2H), 7.62–7.47 (m, 4H), 7.34 (d,  $J = 5.5$  Hz, 3H), 6.48 (s, 1H).  $^{19}\text{F NMR}$  (282 MHz,  $\text{CDCl}_3$ ):  $\delta$  -99.3 (d,  $J = 237.5$  Hz, 1F), -100.9 (d,  $J = 237.4$  Hz, 1F).  $^{13}\text{C NMR}$  (100 MHz,  $\text{CDCl}_3$ ):  $\delta$  145.5, 137.9, 135.8, 135.4, 133.6, 131.9, 130.6, 130.4, 129.2, 129.0, 128.7, 126.8 (dd,  $J = 3.9, 2.0$  Hz), 125.6 (dd,  $J =$



3.1, 1.6 Hz), 125.4, 120.9 (dd,  $J = 301.7, 299.2$  Hz), 79.8 (t,  $J = 20.8$  Hz). IR (film): 3385, 1633, 1583, 1449, 1339, 1149, 1085, 1060  $\text{cm}^{-1}$ . MS (ESI,  $m/z$ ): 420.3 ( $M + H^+$ ). HRMS (ESI): calcd. for  $\text{C}_{20}\text{H}_{15}\text{F}_2\text{NO}_3\text{S}_2$ : ( $M + H^+$ ): 420.0534; Found: 420.0531.

(1*S*,3*R*)-3-[Difluoro(phenylsulfonyl)methyl]-3-(*m*-tolyl)-2,3-dihydrobenzo[*d*]isothiazole 1-oxide (**6b**)

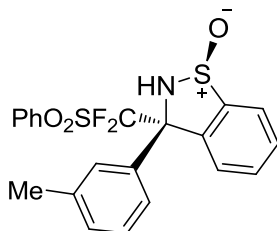

White solid. Mp: 135–136 °C.  $[\alpha]_{\text{D}}^{26} = -85.6$  ( $c = 0.85$ ,  $\text{CHCl}_3$ ).  $^1\text{H}$  NMR (300 MHz,  $\text{CDCl}_3$ ):  $\delta$  7.83–7.80 (m, 1H), 7.76 (d,  $J = 7.8$  Hz, 2H), 7.70–7.64 (m, 4H), 7.55–7.47 (m, 4H), 7.26–7.19 (m, 1H), 7.11 (d,  $J = 8.1$  Hz, 1H), 6.42 (s, 1H), 2.30 (s, 3H).  $^{19}\text{F}$  NMR (282 MHz,  $\text{CDCl}_3$ ):  $\delta$  -97.2 (d,  $J = 236.6$  Hz, 1F), -98.1 (d,  $J = 236.9$  Hz, 1F).  $^{13}\text{C}$  NMR (100 MHz,  $\text{CDCl}_3$ ):  $\delta$  145.7, 138.5, 138.0, 135.9, 135.4, 133.9, 132.0, 130.6, 130.4, 129.9, 129.2, 128.6, 127.5, 125.8, 125.4, 124.0, 121.2 (t,  $J = 293.1$  Hz), 79.9 (t,  $J = 20.4$  Hz), 28.8, 21.7. IR (KBr): 3381, 3064, 1606, 1582, 1448, 1332, 1147, 1080, 1061  $\text{cm}^{-1}$ . MS (ESI,  $m/z$ ): 434 ( $[M + H]^+$ ). HRMS (ESI,  $m/z$ ): Calcd. for  $\text{C}_{21}\text{H}_{18}\text{F}_2\text{NO}_3\text{S}_2$  ( $[M + H]^+$ ): 434.0696; Found: 434.0688.

(1*S*,3*R*)-3-(4-Bromophenyl)-3-[difluoro(phenylsulfonyl)methyl]-2,3-dihydrobenzo[*d*]isothiazole 1-oxide (**6c**)

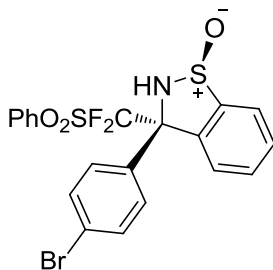

White solid. Mp: 96–98 °C.  $[\alpha]_{\text{D}}^{29} = -103.4$  ( $c = 1.00$ ,  $\text{CHCl}_3$ ).  $^1\text{H}$  NMR (300 MHz,  $\text{CDCl}_3$ ):  $\delta$  7.84–7.71 (m, 6H), 7.65–7.52 (m, 5H), 7.48–7.43 (m, 2H), 6.46 (s, 1H).  $^{19}\text{F}$

NMR (282 MHz, CDCl<sub>3</sub>):  $\delta$  -99.5 (d,  $J$  = 236.9 Hz, 1F), -100.5 (d,  $J$  = 236.6 Hz, 1F). <sup>13</sup>C NMR (100 MHz, CDCl<sub>3</sub>):  $\delta$  145.7, 137.6, 135.6, 135.1, 133.5, 132.1, 131.9, 130.9, 130.5, 129.4, 128.7, 128.6, 125.6, 123.3, 120.8 (t,  $J$  = 297.5 Hz), 79.5 (t,  $J$  = 21.9 Hz). IR (KBr): 3375, 3068, 1491, 1336, 1150, 1070 cm<sup>-1</sup>. MS (ESI,  $m/z$ ): 498 ([M + H]<sup>+</sup>). HRMS (ESI,  $m/z$ ): Calcd. for C<sub>20</sub>H<sub>15</sub>BrF<sub>2</sub>NO<sub>3</sub>S<sub>2</sub><sup>+</sup> ([M + H]<sup>+</sup>): 497.9645; Found: 497.9651.

(1*S*,3*R*)-3-[Difluoro(phenylsulfonyl)methyl]-3-[4-(trifluoromethyl)phenyl]-2,3-dihydrobenzo[*d*]isothiazole 1-oxide (**6d**)

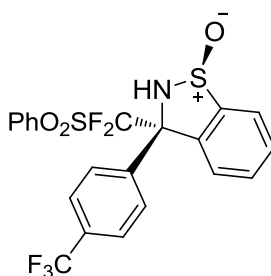

White solid. Mp: 88–90 °C.  $[\alpha]_D^{28} = -89.6$  ( $c = 0.90$ , CHCl<sub>3</sub>). <sup>1</sup>H NMR (300 MHz, CDCl<sub>3</sub>):  $\delta$  8.06 (d,  $J$  = 8.4 Hz, 2H), 7.85–7.79 (m, 3H), 7.75–7.51 (m, 8H), 6.56 (s, 1H). <sup>19</sup>F NMR (282 MHz, CDCl<sub>3</sub>):  $\delta$  -62.4 (s, 3F), -99.8 (d,  $J$  = 237.7 Hz, 1F), -100.5 (d,  $J$  = 237.7 Hz, 1F). <sup>13</sup>C NMR (100 MHz, CDCl<sub>3</sub>):  $\delta$  145.8, 140.0, 137.5, 135.8, 133.3, 132.2, 131.2 (q,  $J$  = 32.8 Hz), 131.0, 130.5, 129.4, 127.5, 125.68 (q,  $J$  = 3.5 Hz), 125.64, 125.57, 123.8 (q,  $J$  = 270.5 Hz), 120.8 (t,  $J$  = 296.7 Hz), 79.6 (t,  $J$  = 21.1 Hz). IR (KBr): 3207, 1619, 1449, 1329, 1124, 1072 cm<sup>-1</sup>. MS (ESI,  $m/z$ ): 488 ([M + H]<sup>+</sup>). HRMS (ESI,  $m/z$ ): Calcd. for C<sub>21</sub>H<sub>15</sub>F<sub>5</sub>NO<sub>3</sub>S<sub>2</sub><sup>+</sup> ([M + H]<sup>+</sup>): 488.0414; Found: 488.0413.

(1*S*,3*R*)-3-(6-Bromonaphthalen-2-yl)-3-[difluoro(phenylsulfonyl)methyl]-2,3-dihydrobenzo[*d*]isothiazole 1-oxide (**6e**)

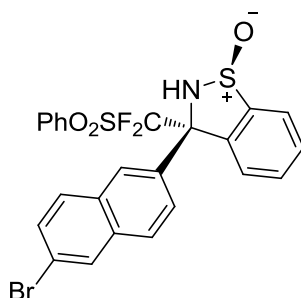

Mp: 113–115 °C.  $[\alpha]_D^{26}$   $-105.8$  ( $c$  0.90,  $\text{CHCl}_3$ ).  $^1\text{H}$  NMR (300 MHz,  $\text{CDCl}_3$ ):  $\delta$  8.38 (s, 1H), 7.98 (d,  $J = 8.6$  Hz, 1H), 7.93 (s, 1H), 7.84 (d,  $J = 7.4$  Hz, 1H), 7.78 (d,  $J = 8.0$  Hz, 2H), 7.75–7.49 (m, 7H), 7.44 (t,  $J = 7.4$  Hz, 2H), 6.61 (s, 1H).  $^{19}\text{F}$  NMR (282 MHz,  $\text{CDCl}_3$ ):  $\delta$   $-99.2$  (d,  $J = 238.5$  Hz, 1F),  $-100.7$  (d,  $J = 238.4$  Hz, 1F).  $^{13}\text{C}$  NMR (100 MHz,  $\text{CDCl}_3$ ):  $\delta$  145.6, 137.6 (d,  $J = 1.5$  Hz), 135.5, 134.1, 133.7 (t,  $J = 1.5$  Hz), 133.4, 132.0, 131.2, 130.8, 130.5, 130.4, 129.9, 129.3, 129.2, 127.5, 126.7 (dd,  $J = 3.7, 2.2$  Hz), 125.7 (d,  $J = 2.2$  Hz), 125.5, 125.1 (dd,  $J = 4.5, 2.3$  Hz), 121.1, 120.9 (t,  $J = 299.5$  Hz), 79.9 (t,  $J = 22.3$  Hz). IR (film): 3370, 1585, 1449, 1336, 1149, 1062  $\text{cm}^{-1}$ . MS (ESI,  $m/z$ ): 548.4 ( $\text{M} + \text{H}^+$ ). HRMS (ESI): calcd. for  $\text{C}_{24}\text{H}_{16}\text{BrF}_2\text{NO}_3\text{S}_2$ : ( $\text{M} + \text{H}^+$ ): 547.9796; Found: 547.9795.

(1*S*,3*R*)-3-[Difluoro(phenylsulfonyl)methyl]-3-[(*E*)-styryl]-2,3-dihydrobenzo[*d*]isothiazole 1-oxide (**6f**)

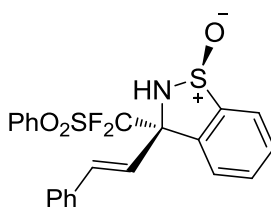

Mp: 82–84 °C.  $[\alpha]_D^{27}$   $-71.4$  ( $c$  0.70,  $\text{CHCl}_3$ ).  $^1\text{H}$  NMR (300 MHz,  $\text{CDCl}_3$ ):  $\delta$  7.95 (d,  $J = 8.1$  Hz, 2H), 7.84 (d,  $J = 5.8$  Hz, 1H), 7.72 (t,  $J = 7.0$  Hz, 1H), 7.63–7.51 (m, 5H), 7.41 (d,  $J = 6.4$  Hz, 2H), 7.35–7.17 (m, 4H), 6.75 (d,  $J = 15.6$  Hz, 1H), 6.27 (s, 1H).  $^{19}\text{F}$  NMR (282 MHz,  $\text{CDCl}_3$ ):  $\delta$   $-105.9$  (d,  $J = 233.6$  Hz, 1F),  $-107.1$  (d,  $J = 233.6$  Hz, 1F).  $^{13}\text{C}$  NMR (100 MHz,  $\text{CDCl}_3$ ):  $\delta$  145.4, 137.2, 135.6, 135.5, 134.7 (d,  $J = 1.2$  Hz), 133.1, 132.0, 130.8, 130.7, 129.3, 128.48, 128.47, 127.3, 125.5, 125.1 (d,  $J = 4.4$  Hz), 122.7 (d,  $J = 2.8$  Hz),

120.2 (t,  $J = 299.6$  Hz), 78.7 (t,  $J = 20.9$  Hz). IR (film): 1449, 1336, 1189, 1151, 1092, 1062  $\text{cm}^{-1}$ . MS (ESI,  $m/z$ ): 446.3 ( $M + H^+$ ). HRMS (ESI): calcd. for  $\text{C}_{22}\text{H}_{17}\text{F}_2\text{NO}_3\text{S}_2$ : ( $M + H^+$ ): 446.0691; Found: 446.0696.

(1*S*,3*R*)-3-[Difluoro(phenylsulfonyl)methyl]-3-isopropyl-2,3-dihydrobenzo[*d*]isothiazole 1-oxide (**6g**)

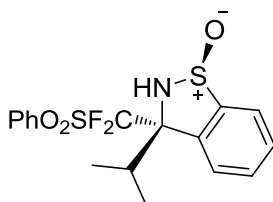

Mp: 106–108 °C.  $[\alpha]_{\text{D}}^{27} -33.8$  ( $c$  0.60,  $\text{CHCl}_3$ ).  $^1\text{H}$  NMR (300 MHz,  $\text{CDCl}_3$ ):  $\delta$  7.84 (d,  $J = 8.2$  Hz, 3H), 7.72 (t,  $J = 7.7$  Hz, 1H), 7.67–7.50 (m, 5H), 5.55 (s, 1H), 2.80–2.65 (m, 1H), 1.11 (d,  $J = 6.7$  Hz, 3H), 0.95 (d,  $J = 6.7$  Hz, 3H).  $^{19}\text{F}$  NMR (282 MHz,  $\text{CDCl}_3$ ):  $\delta$  -98.6 (d,  $J = 241.8$  Hz, 1F), -101.3 (d,  $J = 241.8$  Hz, 1F).  $^{13}\text{C}$  NMR (100 MHz,  $\text{CDCl}_3$ ):  $\delta$  146.8 (d,  $J = 1.5$  Hz), 135.5 (d,  $J = 4.5$  Hz), 135.3, 133.6, 131.5, 130.9, 130.4, 129.2, 125.5, 125.47 (t,  $J = 1.9$  Hz), 121.7 (t,  $J = 300.4$  Hz), 81.1 (t,  $J = 25.3$  Hz), 33.6, 18.4 (dd,  $J = 4.9, 1.0$  Hz), 17.7 (d,  $J = 1.8$  Hz). IR (film): 2977, 1584, 1450, 1348, 1158, 1047  $\text{cm}^{-1}$ . MS (ESI,  $m/z$ ): 386.2 ( $M + H^+$ ). HRMS (ESI): calcd. for  $\text{C}_{17}\text{H}_{17}\text{F}_2\text{NO}_3\text{S}_2$ : ( $M + H^+$ ): 386.0691; Found: 386.0687.

(1*S*,3*R*)-3-[Difluoro(phenylsulfonyl)methyl]-5,6-dimethyl-3-phenyl-2,3-dihydrobenzo[*d*]isothiazole 1-oxide (**6h**)

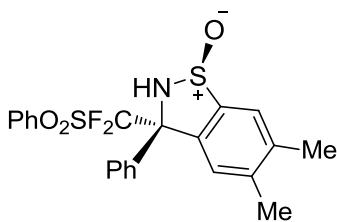

Mp: 161–163 °C.  $[\alpha]_{\text{D}}^{27} -88.5$  ( $c$  0.80,  $\text{CHCl}_3$ ).  $^1\text{H}$  NMR (300 MHz,  $\text{CDCl}_3$ ):  $\delta$  7.88 (d,  $J =$

7.5 Hz, 2H), 7.77 (d,  $J = 7.4$  Hz, 2H), 7.67 (t,  $J = 8.0$  Hz, 1H), 7.57–7.45 (m, 3H), 7.38 (s, 1H), 7.37–7.28 (m, 3H), 6.35 (s, 1H), 2.28 (s, 3H), 2.27 (s, 3H).  $^{19}\text{F}$  NMR (282 MHz,  $\text{CDCl}_3$ ):  $\delta$  -99.5 (d,  $J = 239.3$  Hz, 1F), -100.8 (d,  $J = 239.3$  Hz, 1F).  $^{13}\text{C}$  NMR (100 MHz,  $\text{CDCl}_3$ ):  $\delta$  143.1, 141.5, 140.0, 136.1, 135.5 (d,  $J = 0.8$  Hz), 135.3, 133.7, 130.3, 129.1, 128.8, 128.6, 126.8 (dd,  $J = 3.9, 2.4$  Hz), 126.2 (dd,  $J = 2.8, 0.7$  Hz), 125.8, 121.0 (t,  $J = 302.7$  Hz), 79.5 (t,  $J = 21.0$  Hz), 20.4, 19.8. IR (film): 1583, 1449, 1338, 1184, 1149, 1066, 686, 587  $\text{cm}^{-1}$ . MS (ESI,  $m/z$ ): 448.3 ( $\text{M} + \text{H}^+$ ). HRMS (ESI): calcd. for  $\text{C}_{22}\text{H}_{19}\text{F}_2\text{NO}_3\text{S}_2$ : ( $\text{M} + \text{H}^+$ ): 448.0847; Found: 448.0842.

(1*S*,3*R*)-3-[Difluoro(phenylsulfonyl)methyl]-5,6-dimethyl-3-(*m*-tolyl)-2,3-dihydrobenzo[*d*]isothiazole 1-oxide (**6i**)

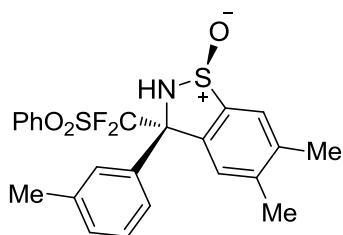

White solid. M.p.: 183–184 °C.  $[\alpha]_{\text{D}}^{26} = -63.8$  ( $c = 0.95$ ,  $\text{CHCl}_3$ ).  $^1\text{H}$  NMR (300 MHz,  $\text{CDCl}_3$ ):  $\delta$  7.75 (d,  $J = 7.8$  Hz, 2H), 7.65 (t,  $J = 6.3$  Hz, 3H), 7.55 (s, 1H), 7.49 (t,  $J = 7.8$  Hz, 2H), 7.36 (s, 1H), 7.21 (t,  $J = 7.5$  Hz, 1H), 7.10 (d,  $J = 7.5$  Hz, 1H), 6.29 (s, 1H), 2.29 (s, 6H), 2.28 (s, 3H).  $^{19}\text{F}$  NMR (282 MHz,  $\text{CDCl}_3$ ):  $\delta$  -98.5 (d,  $J = 235.8$  Hz, 1F), -99.7 (d,  $J = 236.9$  Hz, 1F).  $^{13}\text{C}$  NMR (100 MHz,  $\text{CDCl}_3$ ):  $\delta$  143.3, 141.5, 140.0, 138.4, 136.2, 135.6, 135.3, 134.0, 130.4, 129.7, 129.2, 128.5, 127.5, 126.3, 125.8, 124.0, 121.3 (t,  $J = 298$  Hz), 79.6 (t,  $J = 20.4$  Hz), 21.7, 20.5, 19.9. IR (KBr): 3243, 2921, 1733, 1605, 1448, 1350, 1172, 1148, 1058  $\text{cm}^{-1}$ . MS (ESI,  $m/z$ ): 462 ( $[\text{M} + \text{H}]^+$ ). HRMS (ESI,  $m/z$ ): Calcd. for  $\text{C}_{23}\text{H}_{22}\text{F}_2\text{NO}_3\text{S}_2$  ( $[\text{M} + \text{H}]^+$ ): 462.1009; Found: 462.1009.

(1*S*,3*R*)-3-[Difluoro(phenylsulfonyl)methyl]-3-phenyl-3,5,6,7-tetrahydro-2*H*-indeno[5,6-*d*]isothiazole 1-oxide (**6j**)

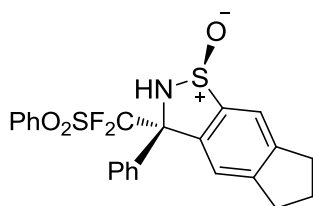

Mp: 191–193 °C.  $[\alpha]_D^{27}$   $-94.6$  ( $c$  0.90,  $\text{CHCl}_3$ ).  $^1\text{H}$  NMR (300 MHz,  $\text{CDCl}_3$ ):  $\delta$  7.90 (d,  $J$  = 6.7 Hz, 2H), 7.78 (d,  $J$  = 7.8 Hz, 2H), 7.68 (t,  $J$  = 7.3 Hz, 1H), 7.59 (s, 1H), 7.50 (t,  $J$  = 7.3 Hz, 2H), 7.44 (s, 1H), 7.32 (d,  $J$  = 5.5 Hz, 3H), 6.36 (s, 1H), 3.00–2.80 (m, 4H), 2.20–2.00 (m, 2H).  $^{19}\text{F}$  NMR (282 MHz,  $\text{CDCl}_3$ ):  $\delta$   $-99.3$  (d,  $J$  = 238.4 Hz, 1F),  $-100.8$  (d,  $J$  = 238.4 Hz, 1F).  $^{13}\text{C}$  NMR (100 MHz,  $\text{CDCl}_3$ ):  $\delta$  149.5, 147.8, 143.8, 136.2 (d,  $J$  = 4.5 Hz), 135.3, 133.7, 130.4, 129.1, 128.8, 128.6, 126.8 (d,  $J$  = 2.1 Hz), 126.7, 121.2 (d,  $J$  = 2.4 Hz), 120.8, 121.1 (dd,  $J$  = 301.2, 298.4 Hz), 79.3 (t,  $J$  = 20.7 Hz), 32.8, 32.4, 25.7. IR (film): 3167, 1583, 1447, 1347, 1145, 1108, 1066, 1042  $\text{cm}^{-1}$ . MS (ESI,  $m/z$ ): 460.3 ( $\text{M} + \text{H}^+$ ). HRMS (ESI): calcd. for  $\text{C}_{23}\text{H}_{19}\text{F}_2\text{NO}_3\text{S}_2$ : ( $\text{M} + \text{H}^+$ ): 460.0847; Found: 460.0846.

### 3.3 *N*-(6-Bromonaphthalen-2-yl)methylation of Cyclic Sulfinamide **6a**

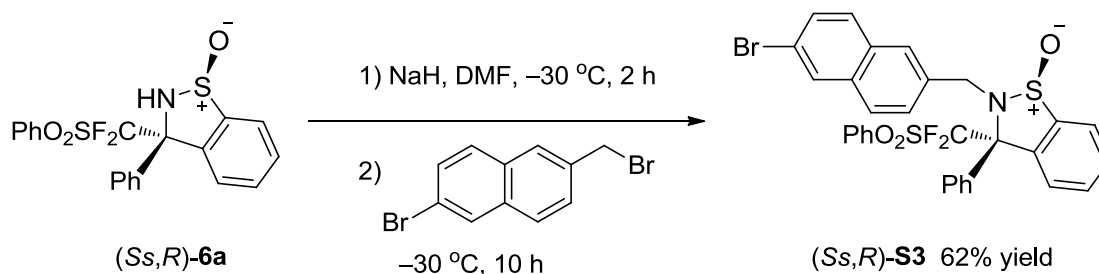

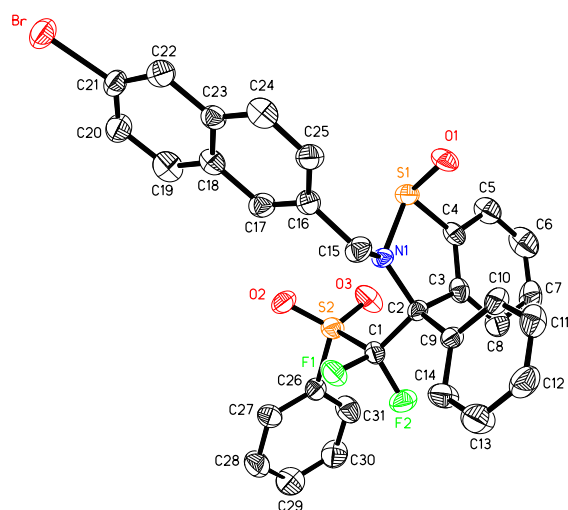

**Figure S2** Structure of Cyclic Sulfonamide (*Ss,R*)-**S3** in the Crystal

### Experimental Procedures:

Under N<sub>2</sub> atmosphere, to a solution of cyclic sulfonamide **6a** (0.126 g, 0.3 mmol) in DMF (6.0 mL) was added NaH (0.0144 g, 0.6 mmol) at  $-30$  °C. After stirring at this temperature for 2 h, 2-bromo-6-(bromomethyl)naphthalene (0.180 g, 0.6 mmol) was added, and then the reaction mixture was stirred at the same temperature for 10 h. After quenched with saturated NH<sub>4</sub>Cl solution, the reaction mixture was extracted with diethyl ether (3 × 30 mL), and the combined organic phases were dried over anhydrous MgSO<sub>4</sub>. The volatile solvents were removed under vacuum, and the crude product was purified by flash column chromatography (silica gel; ethyl acetate/petroleum ether = 1:5, v/v) to give **S3** as a white solid (0.118 g; 62% yield).

(1*S*,3*R*)-2-[(6-Bromonaphthalen-2-yl)methyl]-3-[difluoro(phenylsulfonyl)methyl]-3-phenyl-2,3-dihydrobenzo[*d*]isothiazole 1-oxide (**S3**)

Mp: 225 – 228 °C.  $[\alpha]_{\text{D}}^{28} -52.0$  (*c* 0.75, CHCl<sub>3</sub>). <sup>1</sup>H NMR (300 MHz, CDCl<sub>3</sub>):  $\delta$  8.07 (s, 1H), 8.01 (s, 1H), 7.89 (d, *J* = 8.5 Hz, 1H), 7.83 (d, *J* = 7.8 Hz, 1H), 7.81 – 7.66 (m, 5H),

7.65 – 7.44 (m, 7H), 7.41 – 7.22 (m, 4H), 4.47 (d,  $J = 13.3$  Hz, 1H), 4.20 (d,  $J = 13.3$  Hz, 1H).  $^{19}\text{F}$  NMR (282 MHz,  $\text{CDCl}_3$ ):  $\delta$  -87.6 (d,  $J = 242.7$  Hz, 1F), -95.7 (d,  $J = 242.7$  Hz, 1F).  $^{13}\text{C}$  NMR (100 MHz,  $\text{CDCl}_3$ ):  $\delta$  145.7 (d,  $J = 1.3$  Hz), 140.1 (dd,  $J = 6.4, 1.8$  Hz), 135.1, 134.9, 134.4, 134.2, 133.1, 131.9, 131.6, 130.7, 130.3, 129.8, 129.7, 129.6, 129.3, 129.2, 129.1, 128.9, 128.7 (t,  $J = 2.5$  Hz), 128.6, 127.1, 126.7 (d,  $J = 6.4$  Hz), 125.4 (t,  $J = 305.1$  Hz), 124.6, 120.1, 82.8 (t,  $J = 21.9$  Hz), 49.0 (d,  $J = 6.6$  Hz). IR (film): 3053, 1585, 1498, 1448, 1354, 1181, 1147, 1091  $\text{cm}^{-1}$ . MS (ESI,  $m/z$ ): 638.4 ( $\text{M} + \text{H}^+$ ). HRMS (ESI): calcd. for  $\text{C}_{31}\text{H}_{22}\text{BrF}_2\text{NO}_3\text{S}_2$ : ( $\text{M} + \text{H}^+$ ): 638.0265; Found: 638.0274.

### 3.4 Synthesis of Cyclic Sulfinimines

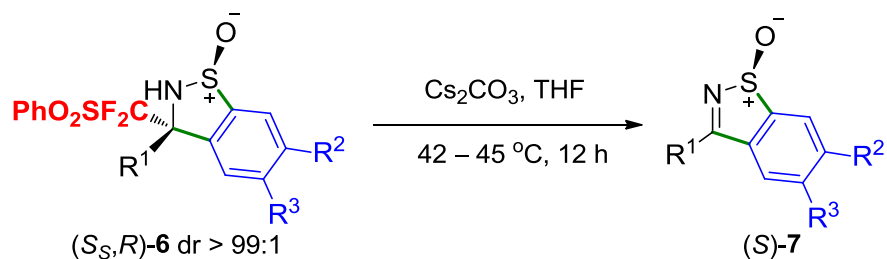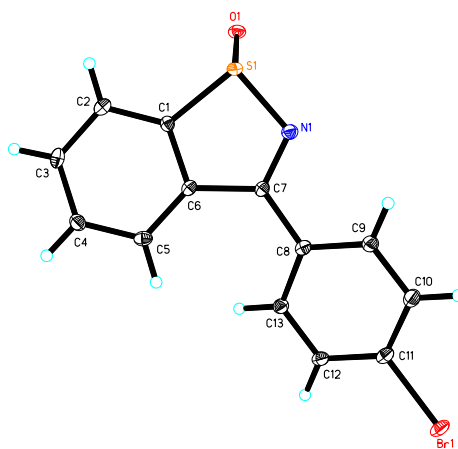

**Figure S3** Structure of Cyclic Sulfinimine (*S*)-7c in the Crystal

#### Typical Procedures:

Under  $\text{N}_2$  atmosphere,  $\text{Cs}_2\text{CO}_3$  (260 mg, 0.8 mmol) was added to a solution of cyclic



sulfonamide (*Ss,R*)-**6a** ( $R^1 = \text{Ph}$ ;  $R^2, R^3 = \text{H}$ ) (89 mg, 0.2 mmol) in dry THF, and then reaction mixture was heated at 42–45 °C for 12 h. After diluted with water (10 mL), the aqueous phase was extracted with ethyl acetate (3 × 20 mL). The combined organic phases were washed with brine (40 mL) and dried over  $\text{Na}_2\text{SO}_4$ . The solvent was removed under vacuum and the residue was purified by flash chromatography (silica gel; *n*-hexane/ethyl acetate = 3: 1 v/v) to afford cyclic sulfinimine (*S*)-**7a** ( $R^1 = \text{Ph}$ ;  $R^2, R^3 = \text{H}$ ) as a white solid (31.7 mg; 70% yield; 98:2 er).

The er of **7a** could be improved to > 99:1 after a single recrystallization from ethyl acetate/petroleum ether (1:1, v/v; 0.073 mol/L) at 0 °C.

(*S*)-3-Phenylbenzo[*d*]isothiazole 1-oxide (**7a**)

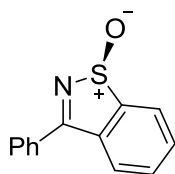

Pale yellow solid. Mp: 74–75 °C.  $[\alpha]_{\text{D}}^{29} -292.6$  (*c* 1.00,  $\text{CHCl}_3$ ), 98:2 er. The enantiomeric ratio was determined by Lux 5u Cellulose–2 (250×4.6 mm), MeOH / IPA= 50 / 50 (v/v), 0.7 mL/min,  $\lambda = 214$  nm,  $t_{\text{R}}$  (major) = 22.39 min,  $t_{\text{R}}$  (minor) = 33.02 min on Dionex Ultimate 3000.  $^1\text{H}$  NMR (300 MHz,  $\text{CDCl}_3$ ):  $\delta$  8.14–8.10 (m, 1H), 7.98–7.93 (m, 3H), 7.74–7.69 (m, 2H), 7.67–7.56 (m, 3H).  $^{13}\text{C}$  NMR (100 MHz,  $\text{CDCl}_3$ ):  $\delta$  174.1, 155.0, 135.1, 132.4, 132.2, 131.5, 129.2, 129.1, 127.0, 125.8. IR (KBr): 1598, 1512, 1443, 1335, 1095  $\text{cm}^{-1}$ . MS (ESI, *m/z*): 227. HRMS (ESI, *m/z*): Calcd. for  $\text{C}_{13}\text{H}_9\text{NOS}$  ( $[\text{M}]^+$ ): 227.0405; Found: 227.0404.

(*S*)-3-(*m*-Tolyl)benzo[*d*]isothiazole 1-oxide (**7b**)

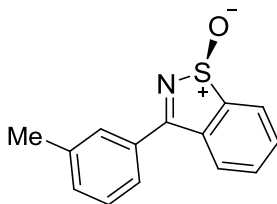

White solid. Mp: 79–80 °C.  $[\alpha]_D^{28}$   $-301.9$  ( $c$  1.00,  $\text{CHCl}_3$ ), 96:4 er. The enantiomeric ratio was determined by Lux 5u Cellulose–1 (250×4.6 mm), MeOH / IPA= 60 / 40 (v/v), 0.7 mL/min,  $\lambda$ = 214 nm,  $t_R$  (major) = 9.46 min,  $t_R$  (minor) = 10.44 min on Dionex Ultimate 3000.  $^1\text{H}$  NMR (300 MHz,  $\text{CDCl}_3$ ):  $\delta$  8.13–8.10 (m, 1H), 7.98–7.94 (m, 1H), 7.77 (s, 1H), 7.75–7.69 (m, 3H), 7.48–7.45 (m, 2H), 2.48 (s, 3H).  $^{13}\text{C}$  NMR (100 MHz,  $\text{CDCl}_3$ ):  $\delta$  174.3, 154.9, 139.1, 135.2, 133.2, 132.3, 132.1, 131.5, 129.6, 128.9, 127.1, 126.3, 125.7, 21.5. IR (KBr): 2965, 1511, 1301, 1078  $\text{cm}^{-1}$ . MS (ESI,  $m/z$ ): 241( $[\text{M}]^+$ ). HRMS (ESI,  $m/z$ ): Calcd. for  $\text{C}_{14}\text{H}_{11}\text{NOS}$  ( $[\text{M}]^+$ ): 241.0561; Found: 241.0558.

(*S*)-3-(4-Bromophenyl)benzo[*d*]isothiazole 1-oxide (**7c**)

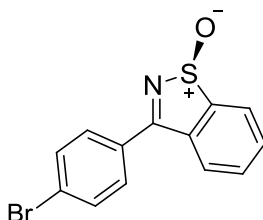

White solid. Mp: 150–152 °C.  $[\alpha]_D^{29}$   $-356.2$  ( $c$  0.55,  $\text{CHCl}_3$ ), 97:3 er. The enantiomeric ratio was determined by Lux 5u Cellulose–1 (250×4.6 mm), MeOH / IPA= 70 / 30 (v/v), 0.7 mL/min,  $\lambda$ = 214 nm,  $t_R$  (major) = 14.13 min,  $t_R$  (minor) = 15.39 min on Dionex Ultimate 3000.  $^1\text{H}$  NMR (300 MHz,  $\text{CDCl}_3$ ):  $\delta$  8.15–8.12 (m, 1H), 7.93–7.91 (m, 1H), 7.85–7.82 (m, 2H), 7.76–7.71 (m, 4H).  $^{13}\text{C}$  NMR (100 MHz,  $\text{CDCl}_3$ ):  $\delta$  173.0, 155.0, 134.8, 132.5, 132.4, 131.7, 131.1, 130.6, 127.3, 126.7, 125.9. IR (KBr): 3078, 1586, 1504, 1485, 1309, 1075, 1008  $\text{cm}^{-1}$ . MS (ESI,  $m/z$ ): 305 ( $[\text{M}]^+$ ). HRMS (ESI,  $m/z$ ): Calcd. for  $\text{C}_{13}\text{H}_8\text{BrNOS}^+$  ( $[\text{M}]^+$ ): 304.9510; Found: 304.9513.

(*S*)-3-[4-(Trifluoromethyl)phenyl]benzo[*d*]isothiazole 1-oxide (**7d**)

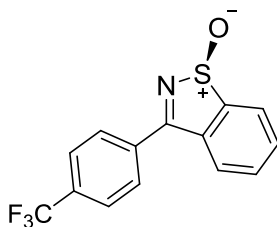

White solid. Mp: 176–177 °C.  $[\alpha]_D^{28}$   $-217.3$  ( $c$  1.10,  $\text{CHCl}_3$ ), 95:5 er. The enantiomeric ratio was determined by Lux 5u Cellulose–1 (250×4.6 mm), MeOH / IPA= 80 / 20 (v/v), 0.7 mL/min,  $\lambda=$  214 nm,  $t_R$  (major) = 17.41 min,  $t_R$  (minor) = 18.85 min on Dionex Ultimate 3000.  $^1\text{H}$  NMR (300 MHz,  $\text{CDCl}_3$ ):  $\delta$  8.17–8.14 (m, 1H), 8.07 (d,  $J$  = 8.4 Hz, 2H), 7.92–7.85 (m, 3H), 7.79–7.73 (m, 2H).  $^{19}\text{F}$  NMR (282 MHz,  $\text{CDCl}_3$ ):  $\delta$   $-63.0$  (s, 3F).  $^{13}\text{C}$  NMR (100 MHz,  $\text{CDCl}_3$ ):  $\delta$  172.9, 155.1, 135.5, 134.7, 133.8 (q,  $J$  = 32.8 Hz), 132.6, 131.9, 129.5, 126.6, 126.1 (q,  $J$  = 3.7 Hz), 126.0, 123.6 (q,  $J$  = 270.5 Hz). IR (KBr): 3105, 1590, 1505, 1411, 1328, 1122, 1081, 1070  $\text{cm}^{-1}$ . MS (ESI,  $m/z$ ): 295 ( $[\text{M}]^+$ ). HRMS (ESI,  $m/z$ ): Calcd. for  $\text{C}_{14}\text{H}_8\text{F}_3\text{NOS}^+$  ( $[\text{M} + \text{Na}]^+$ ): 295.0279; Found: 295.0275.

(*S*)-5,6-Dimethyl-3-phenylbenzo[*d*]isothiazole 1-oxide (**7e**)

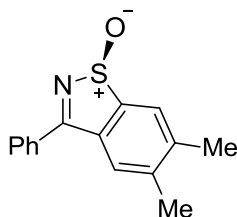

White solid. Mp: 90–91 °C.  $[\alpha]_D^{29}$   $-241.8$  ( $c$  0.80,  $\text{CHCl}_3$ ), 93:7 er. The enantiomeric ratio was determined by Lux 5u Cellulose–2 (250×4.6 mm), MeOH / IPA= 60 / 40 (v/v), 1.0 mL/min,  $\lambda=$  214 nm,  $t_R$  (major) = 43.63 min,  $t_R$  (minor) = 57.64 min on Dionex Ultimate 3000.  $^1\text{H}$  NMR (300 MHz,  $\text{CDCl}_3$ ):  $\delta$  7.94 (d,  $J$  = 7.5 Hz, 2H), 7.89 (s, 1H), 7.68 (s, 1H), 7.64–7.55 (m, 3H), 2.43 (s, 3H), 2.40 (s, 3H).  $^{13}\text{C}$  NMR (100 MHz,  $\text{CDCl}_3$ ):  $\delta$  174.0, 152.7, 141.8, 141.6, 133.4, 132.5, 132.1, 129.1, 129.0, 127.6, 126.6, 20.5, 20.3. IR (KBr): 3445, 3055, 2917, 1595, 1540, 1441, 1335, 1080  $\text{cm}^{-1}$ . MS (ESI,  $m/z$ ): 255. HRMS (ESI,  $m/z$ ): Calcd. for  $\text{C}_{15}\text{H}_{13}\text{NOS}$  ( $[\text{M}]^+$ ): 255.0718; Found: 255.0720.

(*S*)-5,6-Dimethyl-3-(*m*-tolyl)benzo[*d*]isothiazole 1-oxide (**7f**)

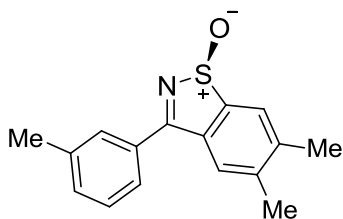

White solid, Mp: 113–114 °C.  $[\alpha]_D^{28}$   $-248.8$  ( $c$  0.75,  $\text{CHCl}_3$ ), 95:5 er. The enantiomeric ratio was determined by Lux 5u Cellulose-1 (250×4.6mm), MeOH / IPA= 60 / 40 (v/v), 0.7 mL/min,  $\lambda=214$  nm,  $t_R$  (major) = 8.67 min,  $t_R$  (minor) = 9.45 min on Dionex Ultimate 3000.  $^1\text{H}$  NMR (300 MHz,  $\text{CDCl}_3$ ):  $\delta$  7.85 (s, 1H), 7.75 (s, 1H), 7.71 (d,  $J = 6.6$  Hz, 1H), 7.67 (s, 1H), 7.49–7.44 (m, 2H), 2.47 (s, 3H), 2.43 (s, 3H), 2.40 (s, 3H).  $^{13}\text{C}$  NMR (100 MHz,  $\text{CDCl}_3$ ):  $\delta$  174.3, 152.6, 141.8, 141.5, 139.0, 133.5, 132.9, 132.5, 129.6, 128.8, 127.6, 126.5, 126.2, 21.5, 20.5, 20.3. IR (KBr): 2919, 1592, 1508, 1336, 1083  $\text{cm}^{-1}$ . MS (ESI,  $m/z$ ): 269 ( $[\text{M}]^+$ ). HRMS (ESI,  $m/z$ ): Calcd. for  $\text{C}_{16}\text{H}_{15}\text{NOS}$  ( $[\text{M}]^+$ ): 269.0874; Found: 269.0876.

### 3.5 Addition to Cyclic Sulfinimines

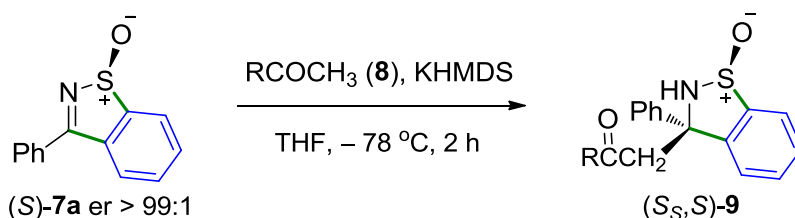

#### Typical Procedures:

Under  $\text{N}_2$  atmosphere, to a solution of **8a** ( $\text{R} = 4\text{-EtC}_6\text{H}_4$ ) (119 mg, 0.8 mmol) in dry THF (1 mL) was added KHMDS (1.0 M in THF, 0.8 mL, 0.8 mmol) at  $-78$  °C. After 10 min, chiral sulfonamide (*S*)-**7a** (91 mg, 0.4 mmol) in THF (0.4 mL) was added to the enolate solution of **8a** at  $-78$  °C. The whole mixture was stirred for 2 h at  $-78$  °C. The reaction mixture was diluted with water (10 mL) and the aqueous phase was extracted with ethyl acetate ( $3 \times 20$  mL). The combined organic phases were washed with brine (40 mL) and dried over anhydrous  $\text{Na}_2\text{SO}_4$ . After the solution was filtered and the solvent was evaporated under vacuum, the residue was subjected to fast column chromatography

(silica gel; *n*-hexane/ethyl acetate 3: 1, v/v) to give product **9a** as a white solid (140 mg; 93% yield).

**Characterization Data:**

1-(4-Ethylphenyl)-2-((*1S,3S*)-1-oxido-3-phenyl-2,3-dihydrobenzo[*d*]isothiazol-3-yl)ethane none (**9a**)

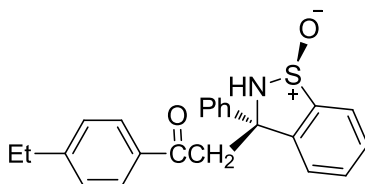

White solid. Mp: 152–154 °C.  $[\alpha]_D^{28} +288.5$  (*c* 1.05, CHCl<sub>3</sub>), 95:5 dr, 99:1 er. The dr and er were determined by CHIRALPAK AS–RH (250 × 4.6 mm), MeOH / IPA= 85 / 15 (v/v), 0.3 mL/min,  $\lambda = 230$  nm,  $t_R$  (major) = 10.37 min,  $t_R$  (minor) = 20.14 min on Dionex Ultimate 3000. <sup>1</sup>H NMR (300 MHz, CDCl<sub>3</sub>):  $\delta$  7.87 (d, *J* = 8.1 Hz, 3H), 7.46–7.45 (m, 2H), 7.33–7.25 (m, 7H), 7.13 (s, 1H), 6.43 (s, 1H), 4.69 (d, *J* = 18.6 Hz, 1H), 3.90 (d, *J* = 18 Hz, 1H), 2.71 (q, *J* = 7.5 Hz, 2H), 1.25 (t, *J* = 7.5 Hz, 3H). <sup>13</sup>C NMR (100 MHz, CDCl<sub>3</sub>):  $\delta$  197.4, 150.9, 146.3, 145.5, 141.9, 134.4, 131.8, 129.1, 128.8, 128.4, 128.3, 127.6, 125.4, 124.8, 124.2, 74.5, 50.1, 29.0, 15.2. IR (KBr): 3323, 3060, 2963, 2932, 1674, 1605, 1448, 1414, 1364, 1224, 1181, 1073 cm<sup>-1</sup>. MS (ESI, *m/z*): 376 ([M + H]<sup>+</sup>). HRMS (ESI, *m/z*): Calcd. for C<sub>23</sub>H<sub>22</sub>NO<sub>2</sub>S<sup>+</sup> ([M + H]<sup>+</sup>): 376.1371; Found: 376.1369.

1-(4-Nitrophenyl)-2-((*1S,3S*)-1-oxido-3-phenyl-2,3-dihydrobenzo[*d*]isothiazol-3-yl)ethane none (**9b**)

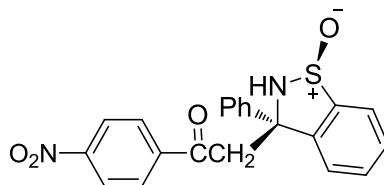

White solid. Mp: 96–98 °C.  $[\alpha]_D^{29} +218.9$  (*c* 0.70, CHCl<sub>3</sub>). 88:12 dr, 99:1 er. The dr and er were determined by Lux 5u Cellulose–1 (250 × 4.6 mm), MeOH / IPA= 90 / 10 (v/v),

0.5 mL/min,  $\lambda = 230$  nm,  $t_R$  (major) = 12.87 min,  $t_R$  (minor) = 23.69 min on Dionex Ultimate 3000.  $^1\text{H}$  NMR (300 MHz,  $\text{CDCl}_3$ ):  $\delta$  8.31 (d,  $J = 8.7$  Hz, 2H), 8.10 (d,  $J = 8.4$  Hz, 2H), 7.87 (d,  $J = 5.1$  Hz, 1H), 7.49 (t,  $J = 3.6$  Hz, 2H), 7.32–7.14 (m, 5H), 7.17 (s, 1H), 6.25 (s, 1H), 4.70 (d,  $J = 18.6$  Hz, 1H), 4.03 (d,  $J = 18.6$  Hz, 1H).  $^{13}\text{C}$  NMR (100 MHz,  $\text{CDCl}_3$ ):  $\delta$  196.4, 150.6, 145.8, 145.3, 141.3, 140.9, 132.0, 129.3, 129.2, 129.0, 127.9, 125.3, 124.9, 124.2, 124.0, 74.2, 50.9. IR (KBr): 3356, 3064, 2906, 1690, 1602, 1525, 1345, 1214, 1073, 1053  $\text{cm}^{-1}$ . MS (ESI,  $m/z$ ): 393( $[\text{M} + \text{H}]^+$ ). HRMS (ESI,  $m/z$ ): Calcd. for  $\text{C}_{21}\text{H}_{17}\text{N}_2\text{O}_4\text{S}^+$  ( $[\text{M} + \text{H}]^+$ ): 393.0909; Found: 393.0893.

1-(4-Bromophenyl)-2- $\{(1S,3S)$ -1-oxido-3-phenyl-2,3-dihydrobenzo[*d*]isothiazol-3-yl}ethanone (**9c**)

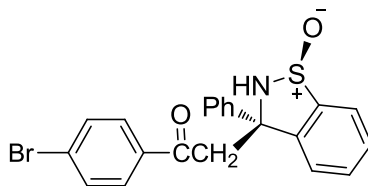

White solid. Mp: 68–70 °C.  $[\alpha]_D^{28} +239.8$  ( $c$  1.00,  $\text{CHCl}_3$ ). 92:8 dr, 99:1 er. The dr and er were determined by Lux 5u Cellulose-3 (250  $\times$  4.6 mm), MeOH / IPA= 90 / 10 (v/v), 0.5 mL/min,  $\lambda = 230$  nm,  $t_R$  (major) = 9.38 min,  $t_R$  (minor) = 8.92 min on Dionex Ultimate 3000.  $^1\text{H}$  NMR (300 MHz,  $\text{CDCl}_3$ ):  $\delta$  7.87–7.78 (m, 3H), 7.63–7.59 (m, 2H), 7.50–7.45 (m, 2H), 7.32–7.25 (m, 5H), 7.16–7.11 (m, 1H), 6.34 (s, 1H), 4.64 (d,  $J = 18.3$  Hz, 1H), 3.91 (d,  $J = 18.3$  Hz, 1H).  $^{13}\text{C}$  NMR (100 MHz,  $\text{CDCl}_3$ ):  $\delta$  196.8, 146.1, 145.4, 141.6, 135.3, 132.1, 131.9, 129.7, 129.2, 129.1, 128.9, 127.7, 125.3, 124.8, 124.2, 74.3, 50.2. IR (KBr): 3447, 3060, 2923, 1682, 1584, 1449, 1355, 1216, 1071, 1053  $\text{cm}^{-1}$ . MS (ESI,  $m/z$ ): 426 ( $[\text{M} + \text{H}]^+$ ). HRMS (ESI,  $m/z$ ): Calcd. for  $\text{C}_{21}\text{H}_{17}\text{BrNO}_2\text{S}^+$  ( $[\text{M} + \text{H}]^+$ ): 426.0163; Found: 426.0150.

1-(Benzo[*b*]thiophen-2-yl)-2- $\{(1S,3S)$ -1-oxido-3-phenyl-2,3-dihydrobenzo[*d*]isothiazol-3-yl}ethanone (**9d**)

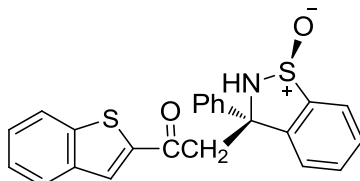

White solid. Mp: 90–92 °C.  $[\alpha]_{\text{D}}^{28} +278.3$  ( $c$  1.05,  $\text{CHCl}_3$ ). 94:6 dr, 99:1 er. The dr and er were determined by Lux 5u Cellulose–1 (250 × 4.6 mm), MeOH / IPA= 90 / 10 (v/v), 0.5 mL/min,  $\lambda = 230$  nm,  $t_{\text{R}}$  (major) = 10.81 min,  $t_{\text{R}}$  (minor) = 14.50 min on Dionex Ultimate 3000.  $^1\text{H}$  NMR (300 MHz,  $\text{CDCl}_3$ ):  $\delta$  8.05 (s, 1H), 7.90–7.85 (m, 3H), 7.48–7.37 (m, 6H), 7.32–7.24 (m, 3H), 7.17 (s, 1H), 6.38 (s, 1H), 4.74 (d,  $J = 18.3$  Hz, 1H), 4.01 (d,  $J = 18.0$  Hz, 1H).  $^{13}\text{C}$  NMR (100 MHz,  $\text{CDCl}_3$ ):  $\delta$  192.1, 146.0, 145.5, 143.1, 142.8, 141.5, 139.0, 131.9, 130.0, 129.2, 128.9, 127.9, 127.8, 126.2, 125.4, 125.3, 124.8, 124.2, 123.0, 74.5, 50.6. IR (KBr): 3337, 3058, 2923, 1730, 1660, 1514, 1449, 1355, 1224, 1169, 1073, 1052  $\text{cm}^{-1}$ . MS (ESI,  $m/z$ ): 404 ( $[\text{M} + \text{H}]^+$ ). HRMS (ESI,  $m/z$ ): Calcd. for  $\text{C}_{23}\text{H}_{18}\text{NO}_2\text{S}_2^+$  ( $[\text{M} + \text{H}]^+$ ): 404.0779; Found: 404.0773.

1-(Naphthalen-2-yl)-2-((1S,3S)-1-oxido-3-phenyl-2,3-dihydrobenzo[d]isothiazol-3-yl)ethanone (**9e**)

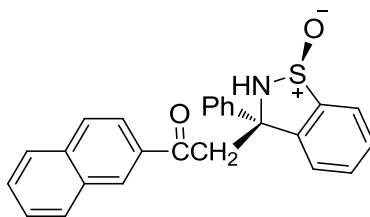

White solid. Mp: 88–90 °C.  $[\alpha]_{\text{D}}^{29} +284.0$  ( $c$  1.00,  $\text{CHCl}_3$ ). 95:5 d, 99:1 er. The dr and er were determined by CHIRALPAK AD–H (250 × 4.6 mm), MeOH / IPA= 90 / 10 (v/v), 0.5 mL/min,  $\lambda = 230$  nm,  $t_{\text{R}}$  (major) = 10.76 min,  $t_{\text{R}}$  (minor) = 22.89 min on Dionex Ultimate 3000.  $^1\text{H}$  NMR (300 MHz,  $\text{CDCl}_3$ ):  $\delta$  8.49 (s, 1H), 8.00–7.87 (m, 5H), 7.64–7.53 (m, 2H), 7.50–7.47 (m, 2H), 7.38–7.25 (m, 5H), 7.20–7.19 (m, 1H), 6.46 (s, 1H), 4.86 (d,  $J = 18.3$  Hz, 1H), 4.08 (d,  $J = 18.3$  Hz, 1H).  $^{13}\text{C}$  NMR (100 MHz,  $\text{CDCl}_3$ ):  $\delta$  197.7, 146.3, 145.5, 141.9, 135.9, 134.0, 132.5, 131.9, 130.2, 129.7, 129.2, 128.9, 128.8, 128.7, 127.9,

127.7, 127.1, 125.4, 124.8, 124.3, 123.6, 74.6, 50.3. IR (KBr): 3339, 3057, 2922, 1675, 1626, 1449, 1359, 1172, 1124, 1053  $\text{cm}^{-1}$ . MS (ESI,  $m/z$ ): 398 ( $[\text{M} + \text{H}]^+$ ). HRMS (ESI,  $m/z$ ): Calcd. for  $\text{C}_{25}\text{H}_{20}\text{NO}_2\text{S}^+$  ( $[\text{M} + \text{H}]^+$ ): 398.1215; Found: 398.1191.

Ethyl 2-((1*S*,3*S*)-1-oxido-3-phenyl-2,3-dihydrobenzo[*d*]isothiazol-3-yl)acetate (**9f**)

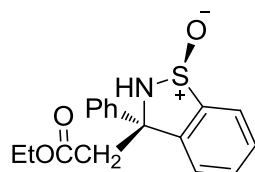

White solid. Mp: 66–68 °C.  $[\alpha]_{\text{D}}^{28} +189.2$  ( $c$  1.10,  $\text{CHCl}_3$ ). 95:5 dr, 99:1 er. The dr and er were determined by Lux 5u Cellulose-3 (250 × 4.6 mm), MeOH / IPA= 85 / 15, 0.3 mL/min,  $\lambda = 230$  nm,  $t_{\text{R}}$  (major) = 12.61 min,  $t_{\text{R}}$  (minor) = 12.13 min on Dionex Ultimate 3000.  $^1\text{H}$  NMR (300 MHz,  $\text{CDCl}_3$ ):  $\delta$  7.82 (d,  $J = 3.9$  Hz, 1H), 7.42–7.39 (m, 4H), 7.35–7.26 (m, 3H), 7.10 (s, 1H), 6.29 (s, 1H), 4.11 (q,  $J = 6.6$  Hz, 2H), 3.77 (d,  $J = 17.1$  Hz, 1H), 3.43 (d,  $J = 16.8$  Hz, 1H), 1.71 (t,  $J = 6.6$  Hz, 3H).  $^{13}\text{C}$  NMR (100 MHz,  $\text{CDCl}_3$ ):  $\delta$  171.0, 145.5, 145.2, 141.6, 131.9, 129.2, 128.9, 127.9, 125.4, 124.7, 124.1, 74.0, 61.1, 46.9, 14.1. IR (KBr): 3334, 2980, 2927, 1725, 1496, 1449, 1372, 1348, 1201, 1075, 1019  $\text{cm}^{-1}$ . MS (ESI,  $m/z$ ): 316 ( $[\text{M} + \text{H}]^+$ ). HRMS (ESI,  $m/z$ ): Calcd. for  $\text{C}_{17}\text{H}_{18}\text{NO}_3\text{S}^+$  ( $[\text{M} + \text{H}]^+$ ): 316.1007; Found: 316.1007.

### 3.6 Oxidation of Cyclic Sulfinamide **9c**

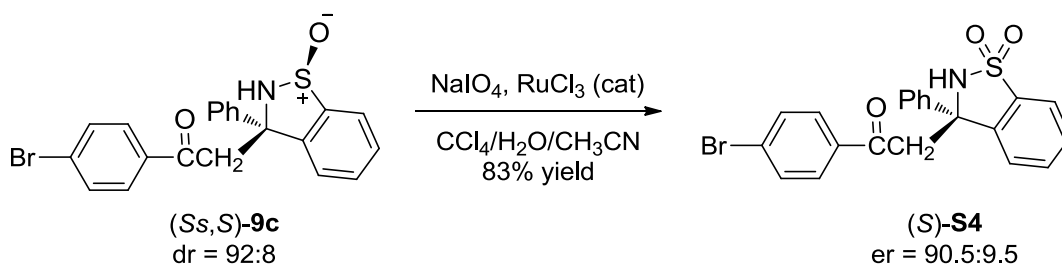





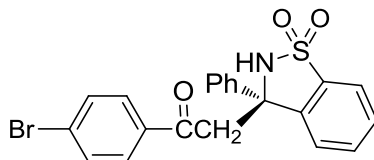

White solid. Mp: 183–185 °C.  $[\alpha]_D^{29} +239.0$  ( $c$  0.95,  $\text{CHCl}_3$ ); 90.5:9.5 er. The enantiomeric excess was determined by Lux 5u Cellulose-1 (250 × 4.6 mm), MeOH / IPA= 60 / 40 (v/v), 0.7 mL/min,  $\lambda = 230$  nm,  $t_R$  (major) = 21.92 min,  $t_R$  (minor) = 31.35 min on Dionex Ultimate 3000.  $^1\text{H}$  NMR (300 MHz,  $\text{CDCl}_3$ ):  $\delta$  7.83 (d,  $J = 7.8$  Hz, 1H), 7.80 (d,  $J = 6.6$  Hz, 2H), 7.63 (d,  $J = 6.6$  Hz, 2H), 7.58–7.51 (m, 2H), 7.48 (d,  $J = 5.7$  Hz, 2H), 7.33–7.23 (m, 4H), 6.62 (s, 1H), 4.46 (d,  $J = 13.5$  Hz, 1H), 3.62 (d,  $J = 13.5$  Hz, 1H).  $^{13}\text{C}$  NMR (100 MHz,  $\text{CDCl}_3$ ):  $\delta$  196.5, 142.6, 141.1, 135.0, 134.0, 133.5, 132.3, 129.7, 129.6, 129.1, 128.2, 125.5, 124.4, 121.7, 65.8, 46.7, 29.7. IR (KBr): 3353, 3284, 2921, 2851, 1678, 1584, 1484, 1359, 1286, 1198, 1162, 1130, 1068  $\text{cm}^{-1}$ . MS (ESI,  $m/z$ ): 464 ( $[\text{M} + \text{Na}]^+$ ). HRMS (ESI,  $m/z$ ): Calcd. for  $\text{C}_{21}\text{H}_{16}\text{BrNNaO}_3\text{S}^+$  ( $[\text{M} + \text{Na}]^+$ ): 463.9932; Found: 463.9943.

### 3.7 Reductive Desulfonylation

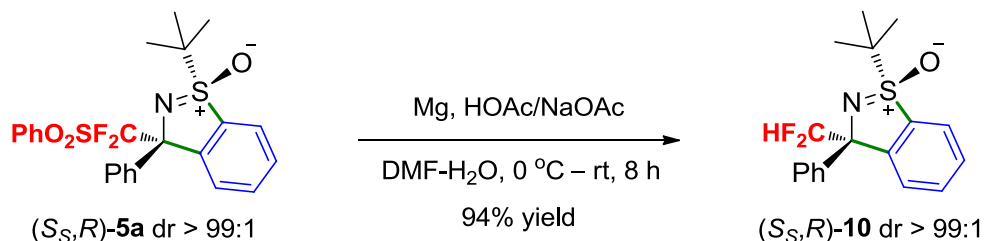

#### Experimental Procedures:

To a solution of  $(S_S,R)\text{-5a}$  (0.095 g, 0.2 mmol) in DMF (6.0 mL), HOAc/NaOAc (1:1) buffer solution ( $M_{(\text{OAc})} = 8$  mol/L; 4.0 ml) and magnesium turnings (0.192 g, 8.0 mmol) were added slowly at 0 °C. Then the reaction temperature was allowed to raise to rt slowly with vigorous stirring. After 8 h, the reaction mixture was diluted with water (10 mL) and the aqueous phase was extracted with diethyl ether (3 × 20 mL). The combined organic phases were washed with brine (20 mL) and dried over anhydrous  $\text{Na}_2\text{SO}_4$ . After the solution was filtered and the solvent was evaporated under vacuum, the residue was

subjected to fast column chromatography (silica gel; ethyl acetate/petroleum ether = 1:3, v/v) to give (*S,S,R*)-**10** (0.063 g; 94% yield).

(1*S*,3*R*)-1-(*tert*-Butyl)-3-(difluoromethyl)-3-phenylbenzo[*d*]isothiazole 1-oxide (**10**)

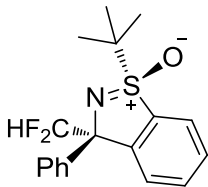

$[\alpha]_D^{21} +20.2$  (*c* 1.10,  $\text{CHCl}_3$ ).  $^1\text{H NMR}$ :  $\delta$  7.83 (d,  $J = 7.8$  Hz, 1H), 7.80–7.70 (q,  $J = 7.4$  Hz, 3H), 7.63 (t,  $J = 7.4$  Hz, 1H), 7.55 (t,  $J = 7.5$  Hz, 1H), 7.35–7.21 (m, 3H), 6.15 (t,  $J = 55.9$  Hz, 1H), 1.61 (s, 9H).  $^{19}\text{F NMR}$ :  $\delta$  -122.3 (dd,  $J = 271.7, 56.9$  Hz, 1F), -123.4 (dd,  $J = 271.7, 56.9$  Hz, 1F).  $^{13}\text{C NMR}$ :  $\delta$  147.7, 141.0, 136.9, 133.6, 130.6, 129.3, 128.7, 127.9 (t,  $J = 1.9$  Hz), 127.6 (t,  $J = 1.9$  Hz), 124.6, 118.2 (t,  $J = 250.7$  Hz), 80.1 (t,  $J = 21.8$  Hz), 63.9, 25.7. IR (film): 2974, 1452, 1366, 1218, 1080, 962, 757  $\text{cm}^{-1}$ . MS (ESI,  $m/z$ ): 336.1 ( $\text{M} + \text{H}^+$ ). HRMS (ESI): calcd. for  $\text{C}_{18}\text{H}_{19}\text{F}_2\text{NOS}$ : ( $\text{M} + \text{H}^+$ ): 336.1228; Found: 336.1225.

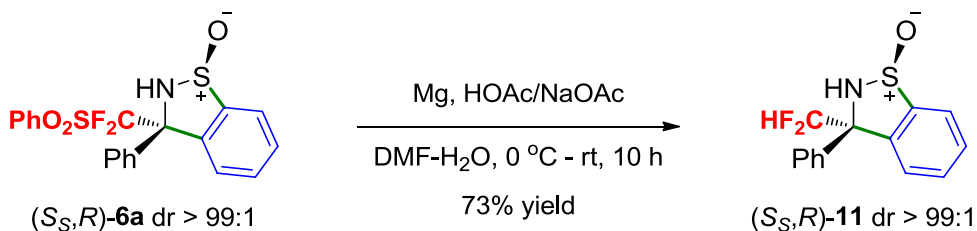

### Experimental Procedures:

To a solution of (*S,S,R*)-**6a** (0.419 g, 1.0 mmol) in DMF (16 mL), HOAc/NaOAc (1:1) buffer solution ( $M_{(\text{OAc})} = 8$  mol/L; 10 ml) and magnesium turnings (0.480 g, 20 mmol) were added slowly at 0  $^\circ\text{C}$ . Then the reaction temperature was allowed to raise to rt slowly with vigorous stirring. After 10 h, the reaction mixture was diluted with water (20 mL) and the aqueous phase was extracted with diethyl ether (3  $\times$  30 mL). The combined organic phases were washed with brine (40 mL) and dried over anhydrous  $\text{Na}_2\text{SO}_4$ . After the solution was filtered and the solvent was evaporated under vacuum, the residue was

subjected to fast column chromatography (silica gel; ethyl acetate/petroleum ether = 1:3, v/v) to give (*Ss,R*)-**11** as a white solid (0.203 g; 73% yield).

(*1S,3R*)-3-(Difluoromethyl)-3-phenyl-2,3-dihydrobenzo[*d*]isothiazole 1-oxide (**11**)

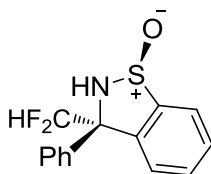

White solid. Mp: 152–154 °C.  $[\alpha]_D^{25}$  -140.9 (*c* 1.00, CHCl<sub>3</sub>). <sup>1</sup>H NMR (300 MHz, CDCl<sub>3</sub>):  $\delta$  7.85–7.83 (m, 1H), 7.70 (d, *J* = 6.9 Hz, 2H), 7.57–7.54 (m, 2H), 7.44 (d, *J* = 4.8 Hz, 1H), 7.39–7.31 (m, 3H), 6.13 (t, *J* = 55.2 Hz, 1H), 5.47 (s, 1H). <sup>19</sup>F NMR (282 MHz, CDCl<sub>3</sub>):  $\delta$  -122.7 (dd, *J* = 274.7 Hz, 54.4 Hz, 1F), -125.9 (dd, *J* = 274.9 Hz, 55.5 Hz, 1F). <sup>13</sup>C NMR (100 MHz, CDCl<sub>3</sub>): 145.9, 138.7, 137.4, 132.2, 130.4, 128.9, 128.6, 127.1 (t, *J* = 1.5 Hz), 125.3, 125.1 (d, *J* = 1.5 Hz), 115.9 (t, *J* = 249.0 Hz), 78.0 (t, *J* = 21.3 Hz). IR (KBr): 3154, 2788, 1497, 1450, 1406, 1361, 1347, 1133, 1077, 1042, 1025, 861 cm<sup>-1</sup>. MS (EI, *m/z*): 279 (M<sup>+</sup>, 4.96), 228 (100). HRMS (EI, *m/z*): Calcd. for C<sub>14</sub>H<sub>11</sub>F<sub>2</sub>NOS<sup>+</sup> ([M + H]<sup>+</sup>): 279.0529; Found: 279.0534.

#### 4. Determination of the Enantioselectivity

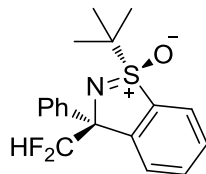

Table 1, entry 4

For racemic product 4d and enantioenriched product 4d (er > 99:1):

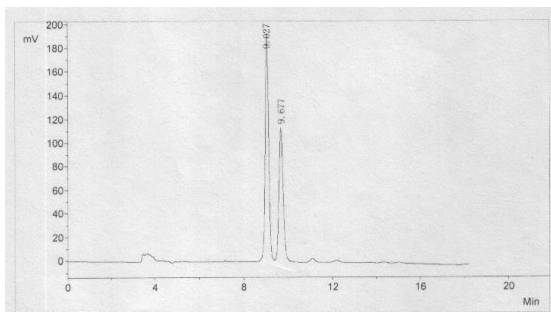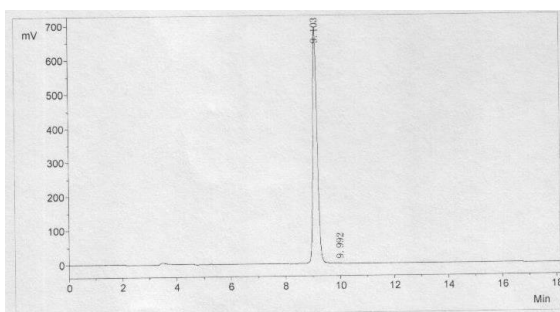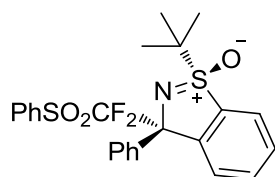

Table S2, entry 7

For racemic product 5a and enantioenriched product 5a (er > 99:1):

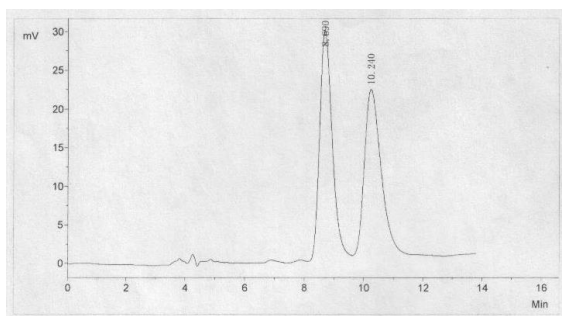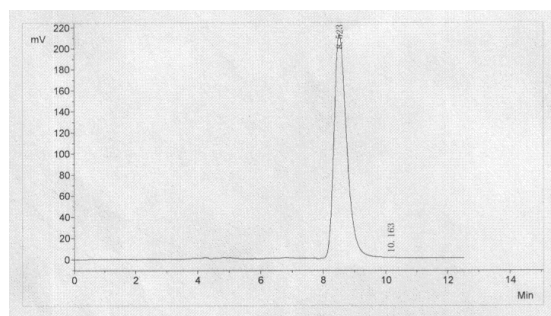

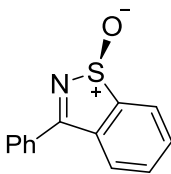

Table 4, entry 1

For racemic product 7a and enantioenriched product 7a (er 98:2):

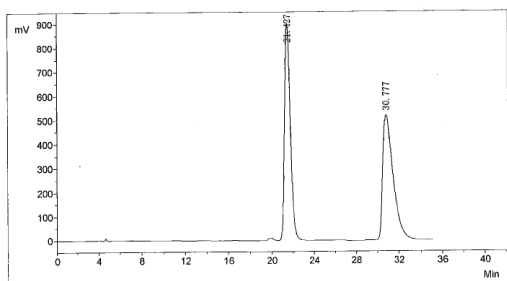

| No.   | PeakNo | ID. Name | R. Time | PeakHeight | PeakArea   | PerCent  |
|-------|--------|----------|---------|------------|------------|----------|
| 1     | 1      |          | 21.427  | 901927.1   | 34493775.5 | 49.7685  |
| 2     | 2      |          | 30.777  | 519230.3   | 34814664.8 | 50.2315  |
| Total |        |          |         | 1421157.4  | 69308440.3 | 100.0000 |

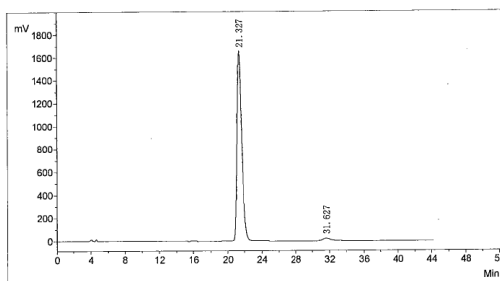

| No.   | PeakNo | ID. Name | R. Time | PeakHeight | PeakArea   | PerCent  |
|-------|--------|----------|---------|------------|------------|----------|
| 1     | 1      |          | 21.327  | 1650354.1  | 64670127.4 | 98.0238  |
| 2     | 2      |          | 31.627  | 20031.7    | 1303748.4  | 1.9762   |
| Total |        |          |         | 1670385.8  | 65973875.8 | 100.0000 |

racemic product 7a and enantioenriched product 7a (after a single recrystallization; er > 99:1):

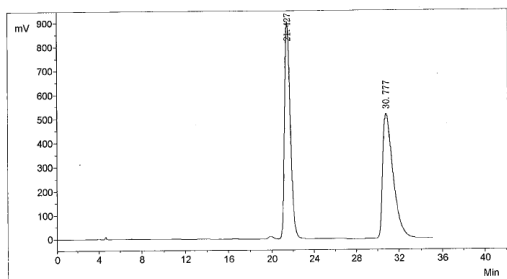

| No.   | PeakNo | ID. Name | R. Time | PeakHeight | PeakArea   | PerCent  |
|-------|--------|----------|---------|------------|------------|----------|
| 1     | 1      |          | 21.427  | 901927.1   | 34493775.5 | 49.7685  |
| 2     | 2      |          | 30.777  | 519230.3   | 34814664.8 | 50.2315  |
| Total |        |          |         | 1421157.4  | 69308440.3 | 100.0000 |

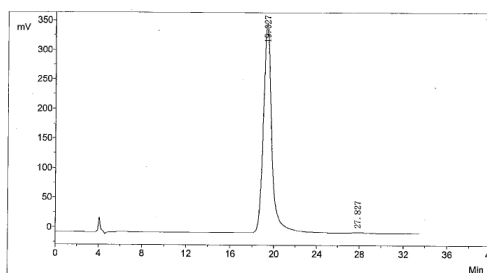

| No.   | PeakNo | ID. Name | R. Time | PeakHeight | PeakArea   | PerCent  |
|-------|--------|----------|---------|------------|------------|----------|
| 1     | 1      |          | 19.327  | 353089.0   | 19199844.0 | 99.6395  |
| 2     | 2      |          | 27.827  | 956.9      | 69462.0    | 0.3605   |
| Total |        |          |         | 354045.9   | 19269306.0 | 100.0000 |

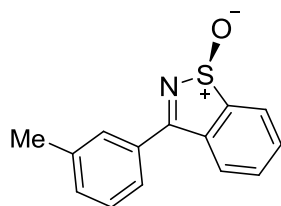

Table 4, entry 2

For racemic product 7b and enantioenriched product 7b (er 96:4):

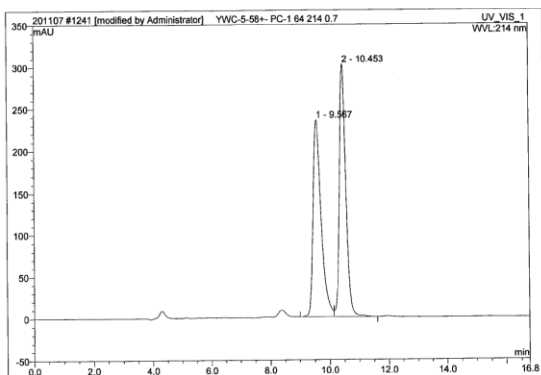

| No.           | Ret.Time min | Peak Name | Height mAU     | Area mAU*min   | Rel.Area %    | Amount       | Type |
|---------------|--------------|-----------|----------------|----------------|---------------|--------------|------|
| 1             | 9.57         | n.a.      | 234.597        | 74.592         | 49.77         | n.a.         | BM*  |
| 2             | 10.45        | n.a.      | 301.546        | 75.279         | 50.23         | n.a.         | MB*  |
| <b>Total:</b> |              |           | <b>536.143</b> | <b>149.871</b> | <b>100.00</b> | <b>0.000</b> |      |

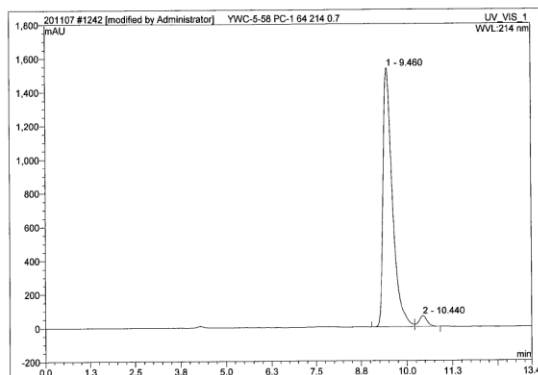

| No.           | Ret.Time min | Peak Name | Height mAU      | Area mAU*min   | Rel.Area %    | Amount       | Type |
|---------------|--------------|-----------|-----------------|----------------|---------------|--------------|------|
| 1             | 9.46         | n.a.      | 1536.727        | 451.294        | 96.51         | n.a.         | BM*  |
| 2             | 10.44        | n.a.      | 63.894          | 16.316         | 3.49          | n.a.         | MB*  |
| <b>Total:</b> |              |           | <b>1600.620</b> | <b>467.610</b> | <b>100.00</b> | <b>0.000</b> |      |

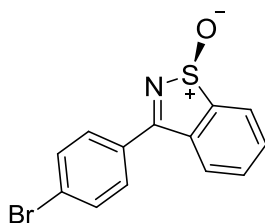

Table 4, entry 3

For racemic product 7c and enantioenriched product 7c (er 97:3):

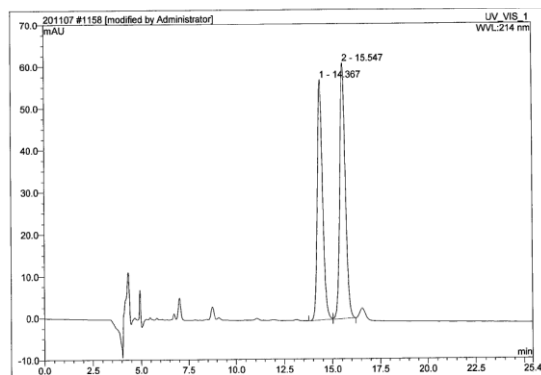

| No.           | Ret.Time min | Peak Name | Height mAU     | Area mAU*min  | Rel.Area %    | Amount       | Type |
|---------------|--------------|-----------|----------------|---------------|---------------|--------------|------|
| 1             | 14.37        | n.a.      | 57.366         | 18.795        | 47.08         | n.a.         | BM*  |
| 2             | 15.55        | n.a.      | 60.995         | 21.125        | 52.92         | n.a.         | MB*  |
| <b>Total:</b> |              |           | <b>118.361</b> | <b>39.920</b> | <b>100.00</b> | <b>0.000</b> |      |

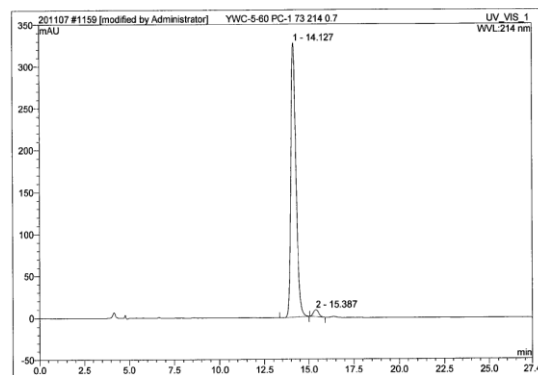

| No.           | Ret.Time min | Peak Name | Height mAU     | Area mAU*min   | Rel.Area %    | Amount       | Type |
|---------------|--------------|-----------|----------------|----------------|---------------|--------------|------|
| 1             | 14.13        | n.a.      | 327.520        | 109.799        | 97.56         | n.a.         | BMB* |
| 2             | 15.39        | n.a.      | 8.352          | 2.748          | 2.44          | n.a.         | BMB* |
| <b>Total:</b> |              |           | <b>335.872</b> | <b>112.547</b> | <b>100.00</b> | <b>0.000</b> |      |

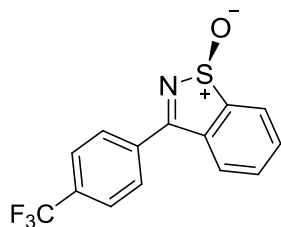

Table 4, entry 4

For racemic product 7d and enantioenriched product 7d (er 95:5):

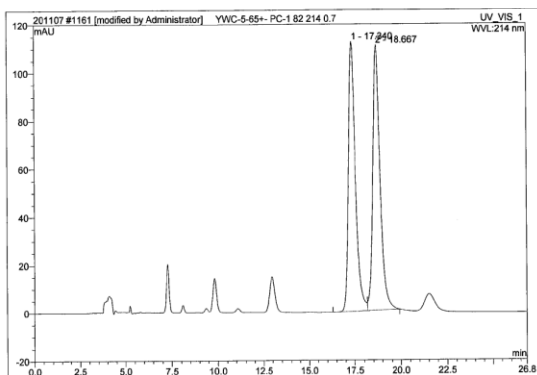

| No.    | Ret.Time min | Peak Name | Height mAU | Area mAU*min | Rel.Area % | Amount | Type |
|--------|--------------|-----------|------------|--------------|------------|--------|------|
| 1      | 17.34        | n.a.      | 112.333    | 49.829       | 49.11      | n.a.   | BM*  |
| 2      | 18.67        | n.a.      | 110.479    | 51.643       | 50.89      | n.a.   | MB*  |
| Total: |              |           | 222.813    | 101.472      | 100.00     | 0.000  |      |

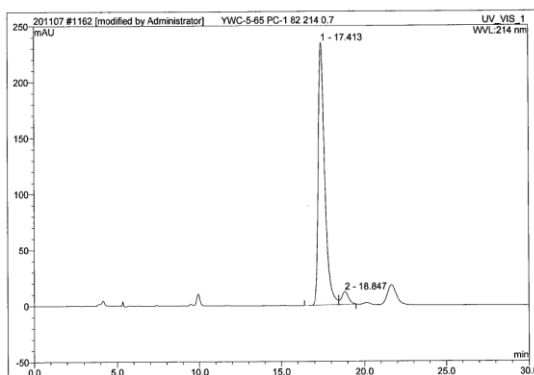

| No.    | Ret.Time min | Peak Name | Height mAU | Area mAU*min | Rel.Area % | Amount | Type |
|--------|--------------|-----------|------------|--------------|------------|--------|------|
| 1      | 17.41        | n.a.      | 234.511    | 106.517      | 95.10      | n.a.   | BM*  |
| 2      | 18.85        | n.a.      | 11.445     | 5.483        | 4.90       | n.a.   | MB*  |
| Total: |              |           | 246.056    | 112.000      | 100.00     | 0.000  |      |

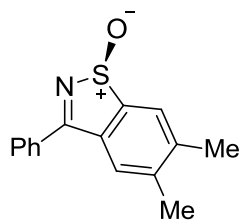

Table 4, entry 5

For racemic product 7e and enantioenriched product 7e (er 93:7):

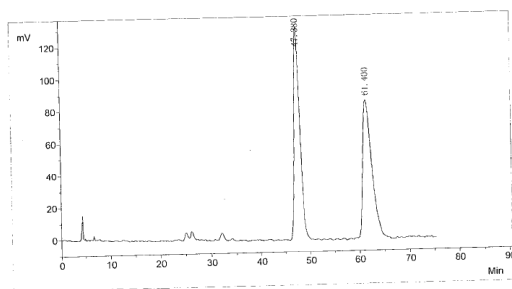

| No.   | PeakNo | ID.Name | R. Time | PeakHeight | PeakArea   | PerCent  |
|-------|--------|---------|---------|------------|------------|----------|
| 1     | 1      |         | 47.380  | 131707.0   | 10911694.6 | 50.7361  |
| 2     | 2      |         | 61.400  | 86185.4    | 10595058.3 | 49.2639  |
| Total |        |         |         | 217892.4   | 21506752.9 | 100.0000 |

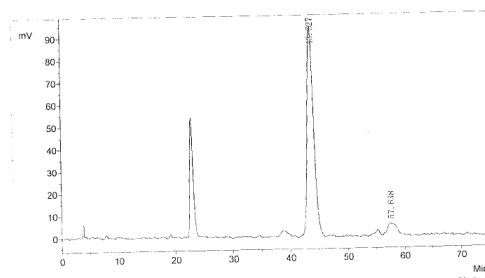

| No.   | PeakNo | ID.Name | R. Time | PeakHeight | PeakArea  | PerCent  |
|-------|--------|---------|---------|------------|-----------|----------|
| 1     | 1      |         | 43.627  | 95541.6    | 7293687.7 | 92.9286  |
| 2     | 2      |         | 57.638  | 5131.7     | 555013.8  | 7.0714   |
| Total |        |         |         | 100673.4   | 7848701.5 | 100.0000 |



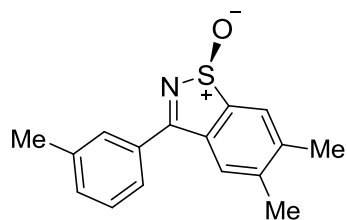

Table 4, entry 6

For racemic product 7f and enantioenriched product 7f (er 95:5):

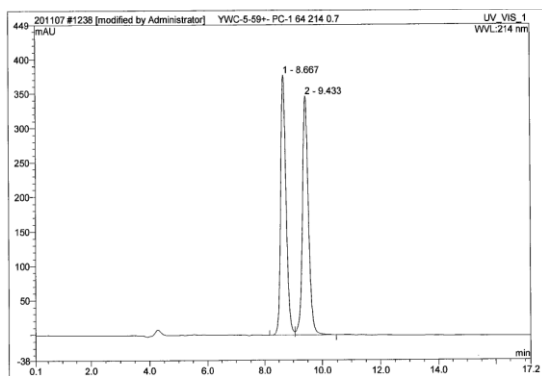

| No.    | Ret.Time<br>min | Peak Name | Height<br>mAU | Area<br>mAU*min | Rel.Area<br>% | Amount | Type |
|--------|-----------------|-----------|---------------|-----------------|---------------|--------|------|
| 1      | 8.67            | n.a.      | 377.523       | 81.709          | 49.66         | n.a.   | BM*  |
| 2      | 9.43            | n.a.      | 346.562       | 82.840          | 50.34         | n.a.   | MB*  |
| Total: |                 |           | 724.085       | 164.548         | 100.00        | 0.000  |      |

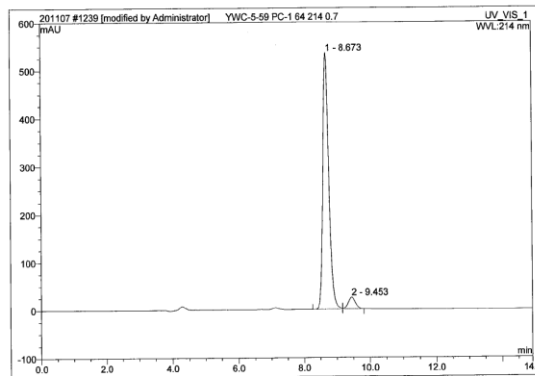

| No.    | Ret.Time<br>min | Peak Name | Height<br>mAU | Area<br>mAU*min | Rel.Area<br>% | Amount | Type |
|--------|-----------------|-----------|---------------|-----------------|---------------|--------|------|
| 1      | 8.67            | n.a.      | 534.743       | 114.023         | 95.07         | n.a.   | BM*  |
| 2      | 9.45            | n.a.      | 24.157        | 5.909           | 4.93          | n.a.   | MB*  |
| Total: |                 |           | 558.900       | 119.932         | 100.00        | 0.000  |      |

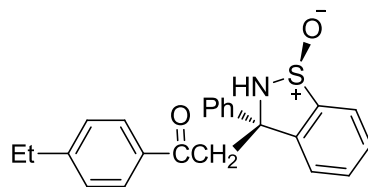

Table 5, entry 1

For racemic product 9a and enantioenriched product 9a (dr 95:5; er 99:1):

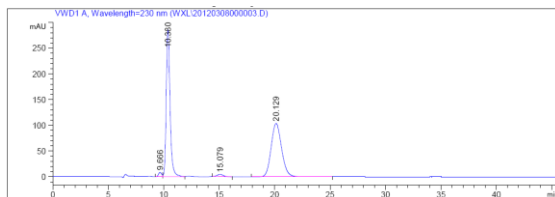

| Peak #   | RetTime [min] | Type | Width [min] | Area [mAU*s] | Height [mAU] | Area %  |
|----------|---------------|------|-------------|--------------|--------------|---------|
| 1        | 9.666         | BV   | 0.3056      | 163.58873    | 8.31279      | 1.1700  |
| 2        | 10.380        | VV   | 0.3646      | 6851.72998   | 285.87903    | 49.0045 |
| 3        | 15.079        | BB   | 0.5551      | 163.35159    | 4.28141      | 1.1683  |
| 4        | 20.129        | BB   | 1.0138      | 6803.17529   | 103.77577    | 48.6572 |
| Totals : |               |      |             | 1.39818e4    | 402.24900    |         |

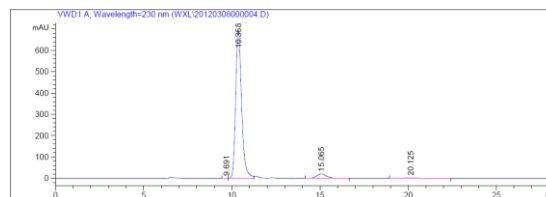

| Peak #   | RetTime [min] | Type | Width [min] | Area [mAU*s] | Height [mAU] | Area %  |
|----------|---------------|------|-------------|--------------|--------------|---------|
| 1        | 9.691         | BB   | 0.2010      | 3.64134      | 2.91068e-1   | 0.0213  |
| 2        | 10.368        | BV   | 0.3581      | 1.62053e4    | 692.18268    | 94.7172 |
| 3        | 15.065        | BB   | 0.5868      | 772.05377    | 20.25074     | 4.5125  |
| 4        | 20.125        | BB   | 0.8225      | 128.14476    | 1.95050      | 0.7490  |
| Totals : |               |      |             | 1.71091e4    | 714.67499    |         |

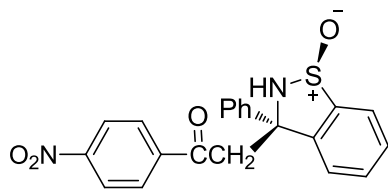

Table 5, entry 2

For racemic product 9b and enantioenriched product 9b (dr 88:12; er 99:1):

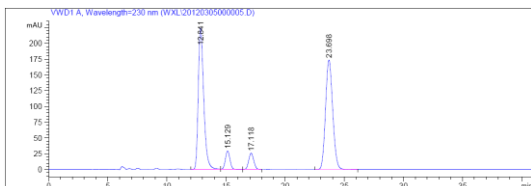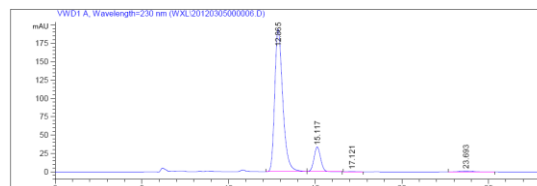

| Peak # | RetTime [min] | Type | Width [min] | Area [mAU*s] | Height [mAU] | Area %  |
|--------|---------------|------|-------------|--------------|--------------|---------|
| 1      | 12.841        | BV   | 0.4895      | 7188.75049   | 223.97156    | 44.8805 |
| 2      | 15.129        | VB   | 0.4157      | 780.22742    | 29.19925     | 4.8711  |
| 3      | 17.118        | BB   | 0.4593      | 750.94043    | 25.51740     | 4.6882  |
| 4      | 23.698        | MM   | 0.7007      | 7297.63574   | 173.58002    | 45.5602 |

Totals : 1.60176e4 452.26822

| Peak # | RetTime [min] | Type | Width [min] | Area [mAU*s] | Height [mAU] | Area %  |
|--------|---------------|------|-------------|--------------|--------------|---------|
| 1      | 12.865        | BV   | 0.4916      | 6256.29395   | 193.79486    | 86.7624 |
| 2      | 15.117        | VB   | 0.4149      | 892.22308    | 33.48107     | 12.3734 |
| 3      | 17.121        | MM   | 0.6122      | 11.81188     | 3.21550e-1   | 0.1638  |
| 4      | 23.693        | BB   | 0.6093      | 50.50572     | 1.17315      | 0.7004  |

Totals : 7210.83463 228.77063

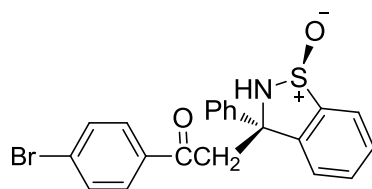

Table 5, entry 3

For racemic product 9c and enantioenriched product 9c (dr 92:8; er 99:1):

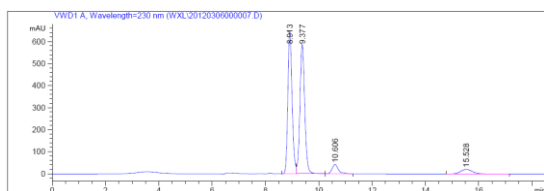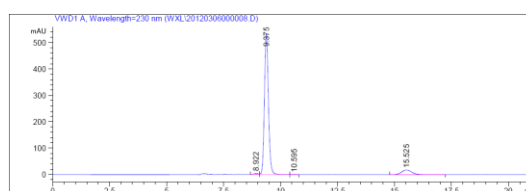

| Peak # | RetTime [min] | Type | Width [min] | Area [mAU*s] | Height [mAU] | Area %  |
|--------|---------------|------|-------------|--------------|--------------|---------|
| 1      | 8.913         | BV   | 0.1712      | 7159.23975   | 646.52527    | 45.3411 |
| 2      | 9.377         | VB   | 0.1915      | 7326.48633   | 587.47137    | 46.4003 |
| 3      | 10.606        | BB   | 0.2494      | 680.10400    | 41.67731     | 4.3073  |
| 4      | 15.528        | BB   | 0.4693      | 623.91388    | 20.54512     | 3.9514  |

Totals : 1.57897e4 1296.21908

| Peak # | RetTime [min] | Type | Width [min] | Area [mAU*s] | Height [mAU] | Area %  |
|--------|---------------|------|-------------|--------------|--------------|---------|
| 1      | 8.922         | BV   | 0.1668      | 50.57066     | 4.61703      | 0.7123  |
| 2      | 9.375         | VV   | 0.1887      | 6518.44873   | 532.82629    | 91.8194 |
| 3      | 10.595        | VB   | 0.2058      | 3.05975      | 2.16552e-1   | 0.0431  |
| 4      | 15.525        | VB   | 0.4718      | 527.12561    | 17.28636     | 7.4251  |

Totals : 7099.20475 554.94623

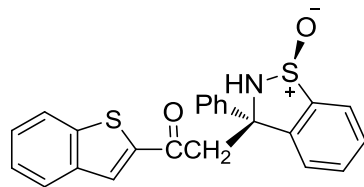

Table 5, entry 4

For racemic product 9d and enantioenriched product 9d (dr 94:6; er 99:1):

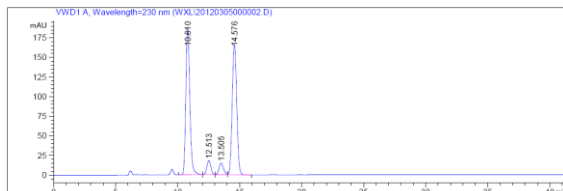

| Peak # | RetTime [min] | Type | Width [min] | Area [mAU*s] | Height [mAU] | Area %  |
|--------|---------------|------|-------------|--------------|--------------|---------|
| 1      | 10.810        | BB   | 0.3510      | 4237.83154   | 186.59039    | 46.0434 |
| 2      | 12.513        | BV   | 0.3451      | 396.82645    | 17.93722     | 4.3115  |
| 3      | 13.505        | VV   | 0.3916      | 379.79050    | 14.98961     | 4.1264  |
| 4      | 14.576        | VB   | 0.3949      | 4189.54785   | 166.28526    | 45.5188 |

Totals : 9203.99634 385.80248

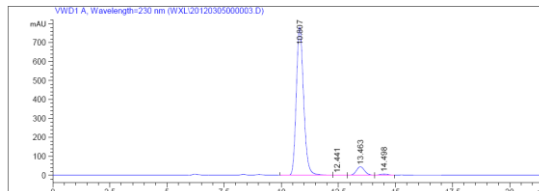

| Peak # | RetTime [min] | Type | Width [min] | Area [mAU*s] | Height [mAU] | Area %  |
|--------|---------------|------|-------------|--------------|--------------|---------|
| 1      | 10.807        | BV   | 0.3435      | 1.73742e4    | 781.18713    | 93.2256 |
| 2      | 12.441        | VB   | 0.3286      | 17.60062     | 7.50541e-1   | 0.0944  |
| 3      | 13.463        | BV   | 0.3870      | 1094.60071   | 44.19531     | 5.8734  |
| 4      | 14.498        | VV   | 0.3934      | 150.32062    | 5.93607      | 0.8066  |

Totals : 1.86367e4 832.06905

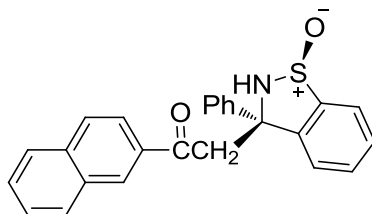

Table 5, entry 5

For racemic product 9e and enantioenriched product 9e (dr 95:5; er 99:1):

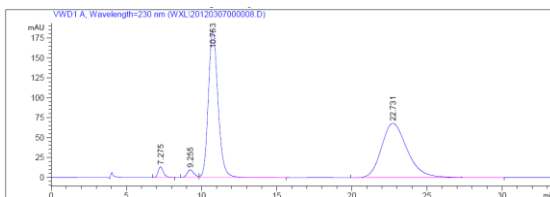

| Peak # | RetTime [min] | Type | Width [min] | Area [mAU*s] | Height [mAU] | Area %  |
|--------|---------------|------|-------------|--------------|--------------|---------|
| 1      | 7.275         | BB   | 0.3706      | 314.50177    | 13.16936     | 1.8523  |
| 2      | 9.255         | VV   | 0.4741      | 291.67807    | 9.37292      | 1.7179  |
| 3      | 10.753        | VB   | 0.6878      | 8226.77734   | 184.30013    | 48.4531 |
| 4      | 22.731        | BB   | 1.7812      | 8145.87842   | 68.26195     | 47.9767 |

Totals : 1.69788e4 275.10436

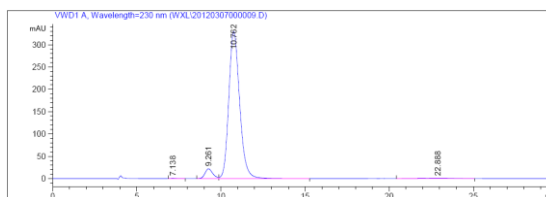

| Peak # | RetTime [min] | Type | Width [min] | Area [mAU*s] | Height [mAU] | Area %  |
|--------|---------------|------|-------------|--------------|--------------|---------|
| 1      | 7.138         | MM   | 0.3023      | 12.48527     | 6.88352e-1   | 0.0803  |
| 2      | 9.261         | VV   | 0.4848      | 693.42529    | 21.87630     | 4.4623  |
| 3      | 10.762        | VB   | 0.6865      | 1.47145e4    | 329.16595    | 94.6903 |
| 4      | 22.888        | MM   | 1.9746      | 119.19521    | 1.00606      | 0.7670  |

Totals : 1.55397e4 352.73667

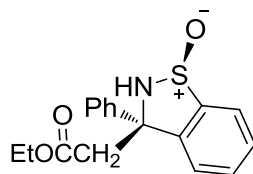

Table 5, entry 6

For racemic product 9f and enantioenriched product 9f (dr 95:5; er 99:1):

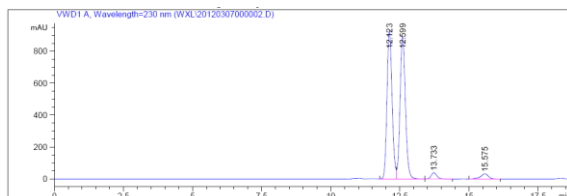

| Peak # | RetTime [min] | Type | Width [min] | Area [mAU*s] | Height [mAU] | Area %  |
|--------|---------------|------|-------------|--------------|--------------|---------|
| 1      | 12.123        | BV   | 0.1980      | 1.18647e4    | 929.21362    | 47.2776 |
| 2      | 12.599        | VB   | 0.2084      | 1.20484e4    | 892.97437    | 48.0098 |
| 3      | 13.733        | BB   | 0.2190      | 538.30145    | 38.06496     | 2.1450  |
| 4      | 15.575        | VV   | 0.2968      | 644.37830    | 32.42722     | 2.5677  |

Totals : 2.50958e4 1892.68016

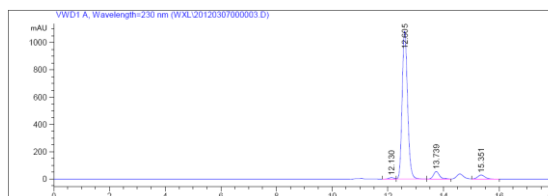

| Peak # | RetTime [min] | Type | Width [min] | Area [mAU*s] | Height [mAU] | Area %  |
|--------|---------------|------|-------------|--------------|--------------|---------|
| 1      | 12.130        | BV   | 0.1901      | 128.13869    | 10.44580     | 0.8009  |
| 2      | 12.605        | VB   | 0.2088      | 1.45606e4    | 1083.50818   | 91.0041 |
| 3      | 13.739        | BB   | 0.2241      | 791.95721    | 54.31679     | 4.9497  |
| 4      | 15.351        | VB   | 0.2781      | 519.24432    | 28.69657     | 3.2453  |

Totals : 1.60000e4 1176.96734

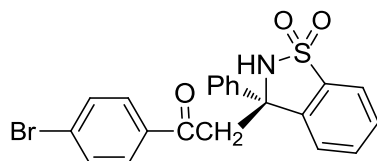

SI Section 3.6

For racemic product S4 and enantioenriched product S4 (er 90.5:9.5):

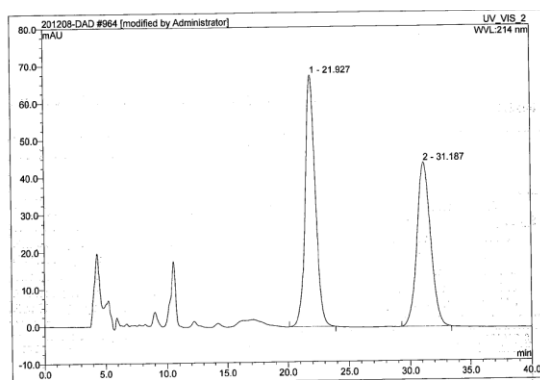

| No.    | Ret.Time min | Peak Name | Height mAU | Area mAU*min | Rel.Area % | Amount | Type |
|--------|--------------|-----------|------------|--------------|------------|--------|------|
| 1      | 21.93        | n.a.      | 67.579     | 64.171       | 52.23      | n.a.   | BMB  |
| 2      | 31.19        | n.a.      | 44.061     | 58.687       | 47.77      | n.a.   | BMB  |
| Total: |              |           | 111.641    | 122.857      | 100.00     | 0.000  |      |

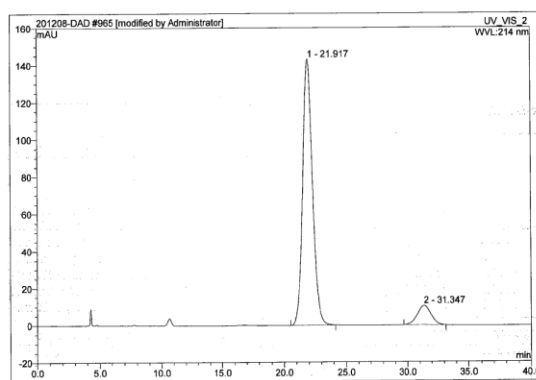

| No.    | Ret.Time min | Peak Name | Height mAU | Area mAU*min | Rel.Area % | Amount | Type |
|--------|--------------|-----------|------------|--------------|------------|--------|------|
| 1      | 21.92        | n.a.      | 143.206    | 130.271      | 90.56      | n.a.   | BMB  |
| 2      | 31.35        | n.a.      | 10.418     | 13.582       | 9.44       | n.a.   | BMB  |
| Total: |              |           | 153.624    | 143.853      | 100.00     | 0.000  |      |

For racemic product S4 and enantioenriched product S4 (after a single recrystallization; er > 99:1):

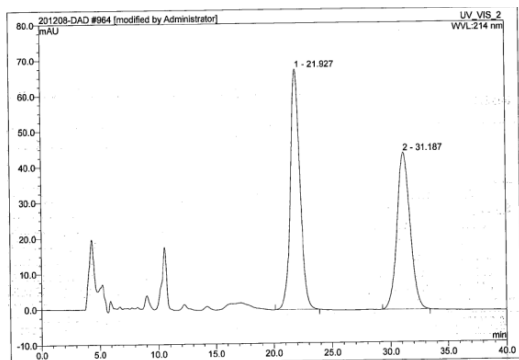

| No.           | Ret.Time min | Peak Name | Height mAU | Area mAU*min | Rel.Area % | Amount | Type |
|---------------|--------------|-----------|------------|--------------|------------|--------|------|
| 1             | 21.93        | n.a.      | 67.579     | 64.171       | 52.23      | n.a.   | BMB  |
| 2             | 31.19        | n.a.      | 44.061     | 58.687       | 47.77      | n.a.   | BMB  |
| <b>Total:</b> |              |           | 111.641    | 122.857      | 100.00     | 0.000  |      |

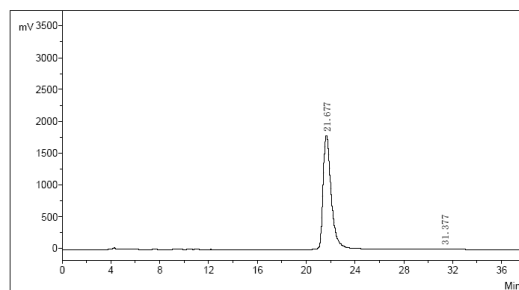

| No.          | PeakNo | ID. Name | R. Time | PeakHeight | PeakArea   | PerCent  |
|--------------|--------|----------|---------|------------|------------|----------|
| 1            | 1      |          | 21.677  | 1780675.6  | 83914698.6 | 99.5743  |
| 2            | 2      |          | 31.377  | 5652.5     | 358744.7   | 0.4257   |
| <b>Total</b> |        |          |         | 1786328.1  | 84273443.3 | 100.0000 |

## 5. $^1\text{H}$ , $^{19}\text{F}$ , and $^{13}\text{C}$ NMR Spectrum of New Compounds

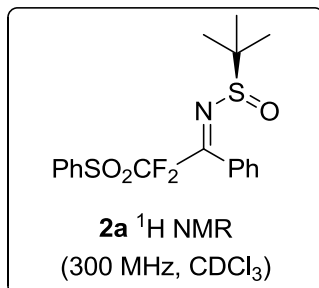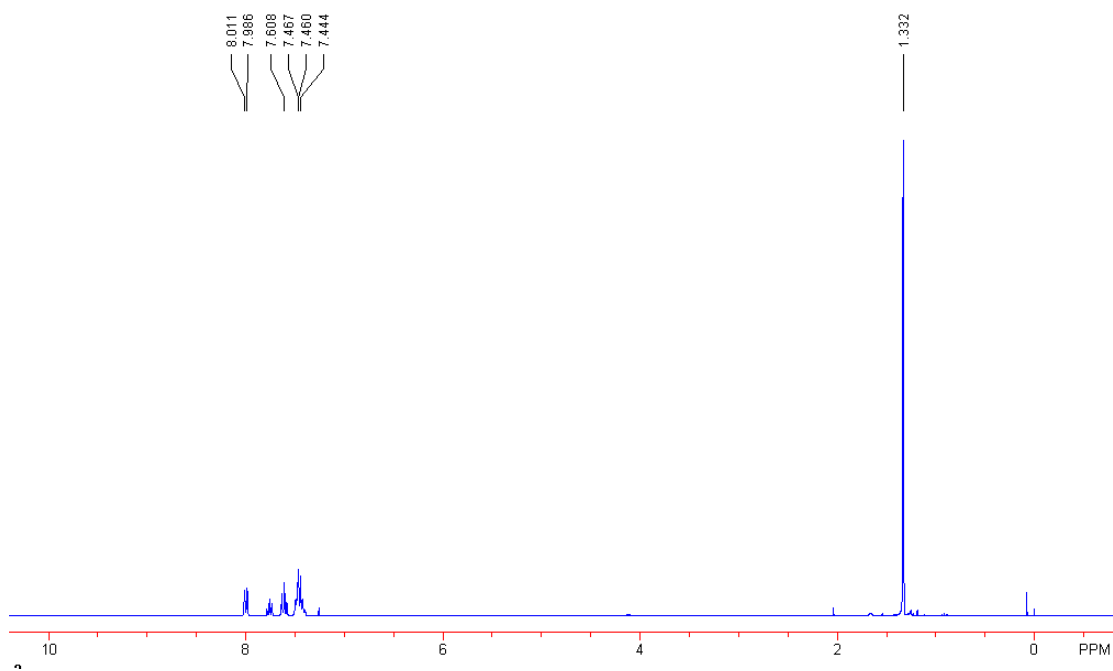

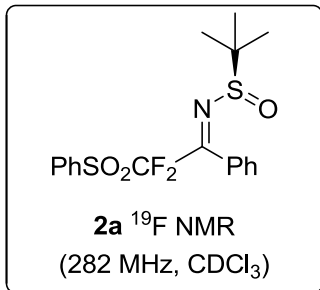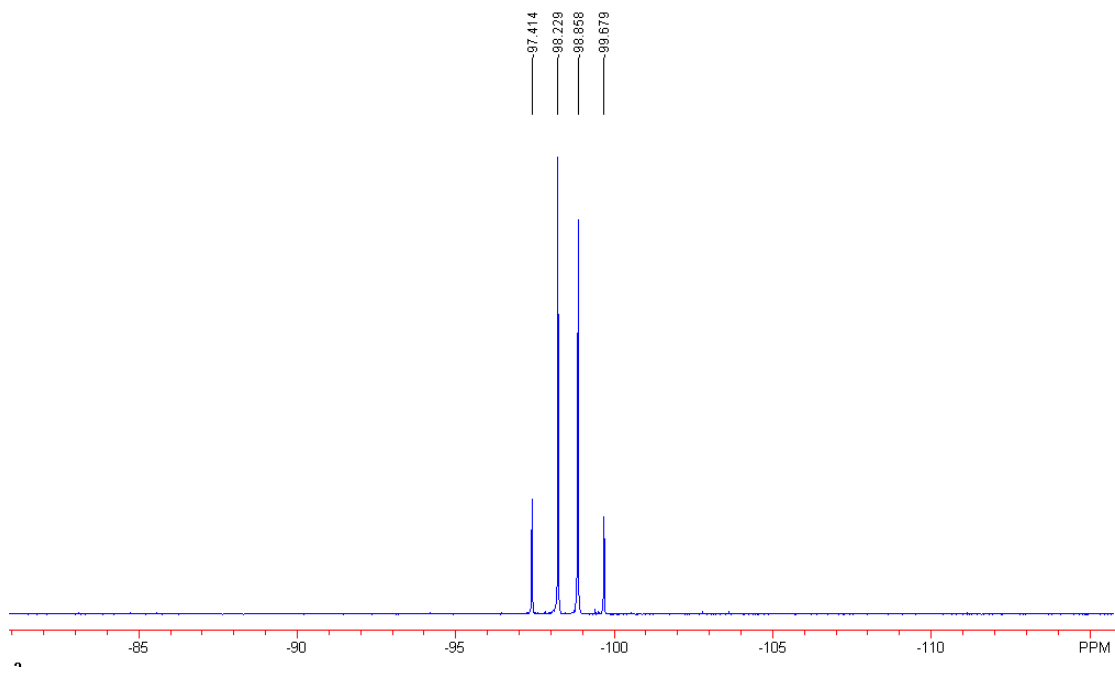

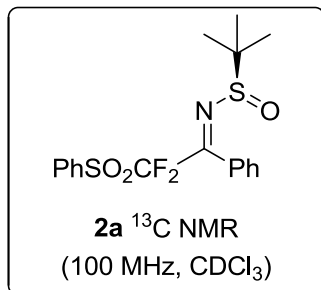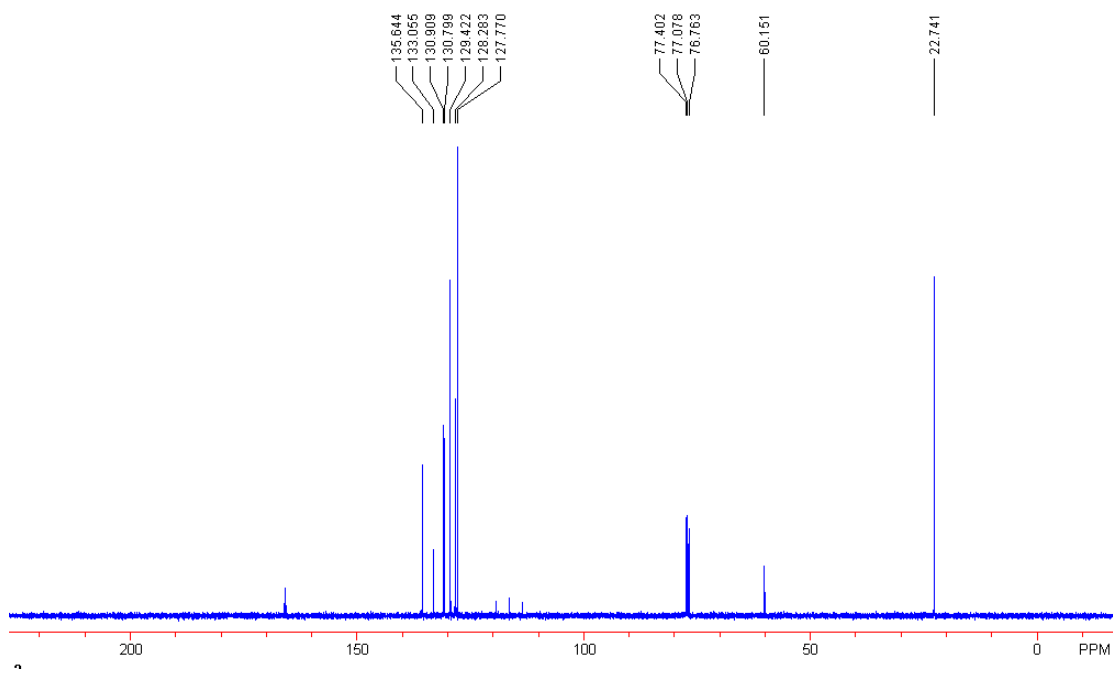



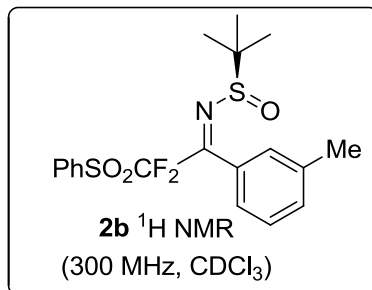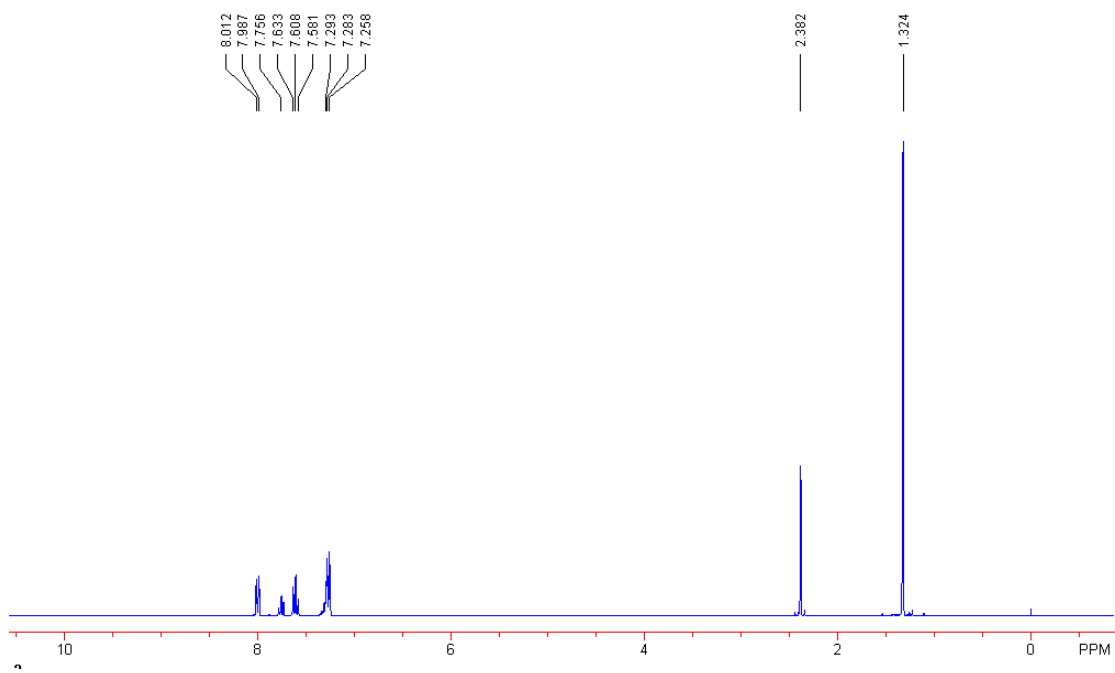

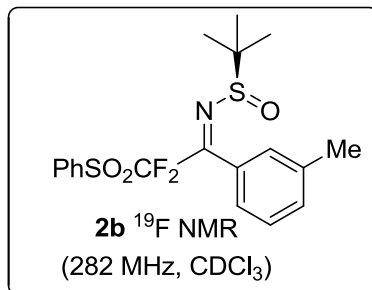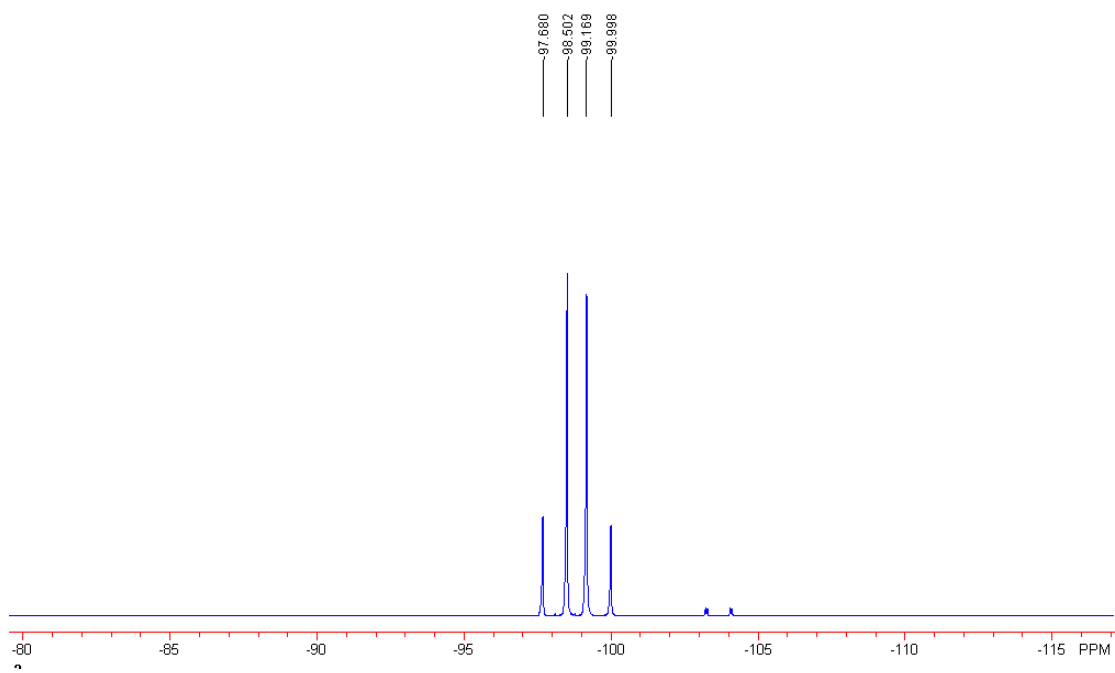

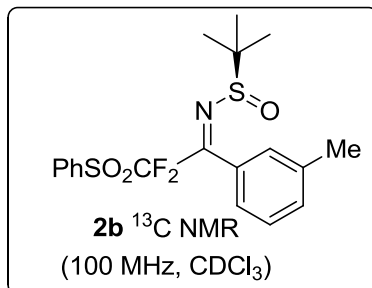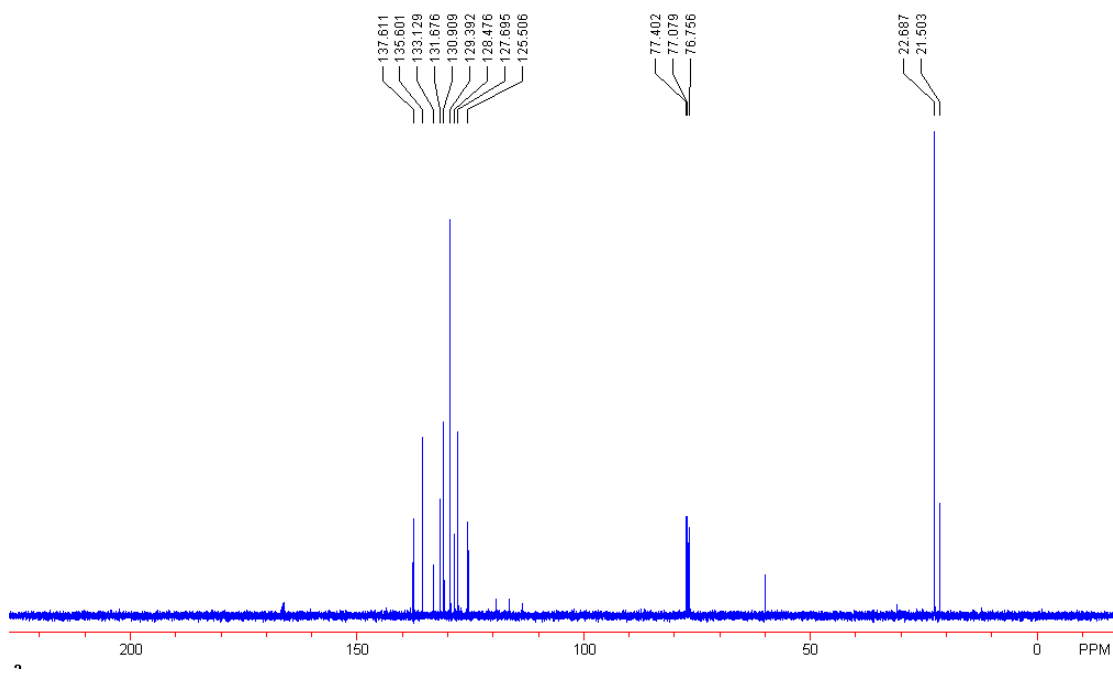

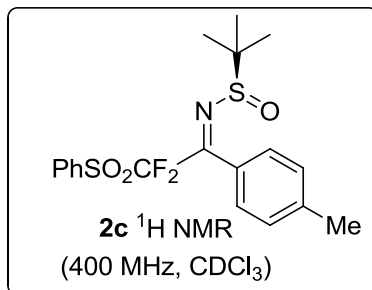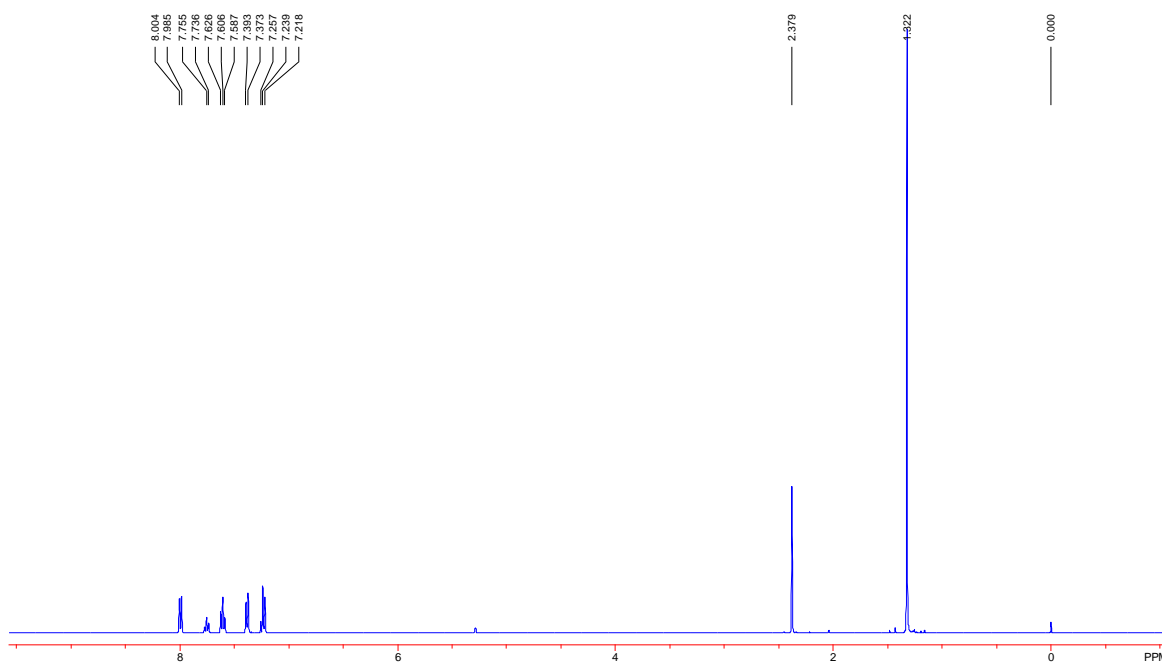

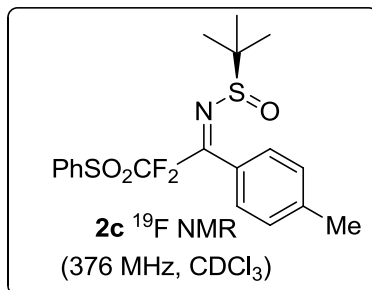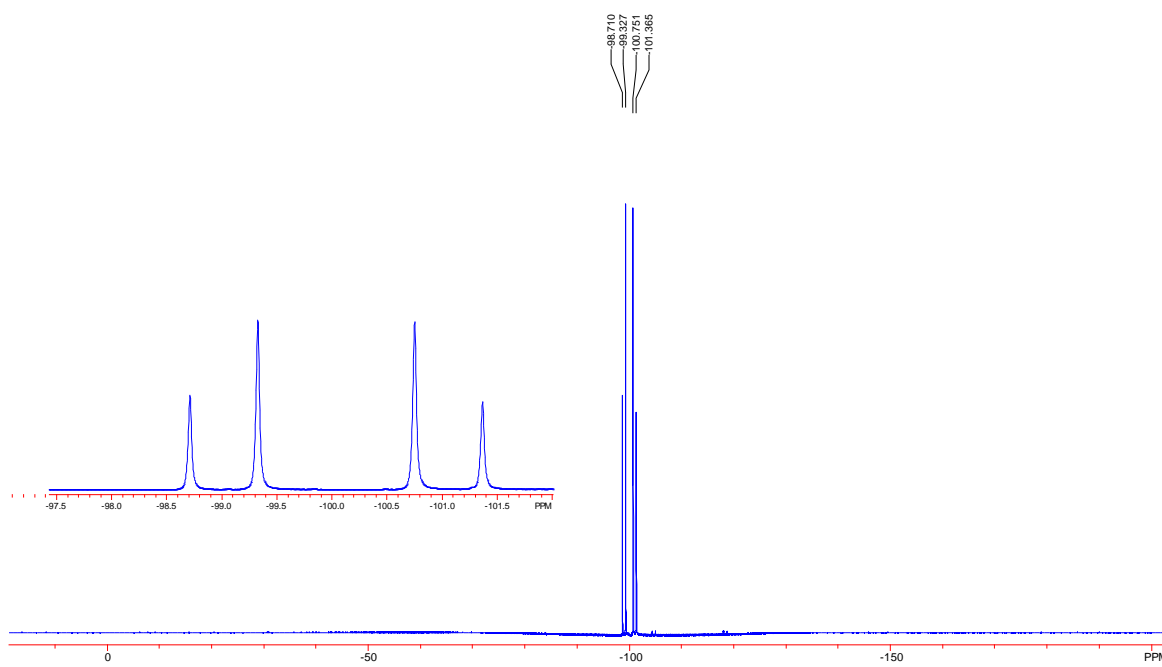

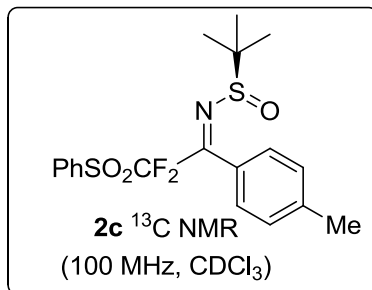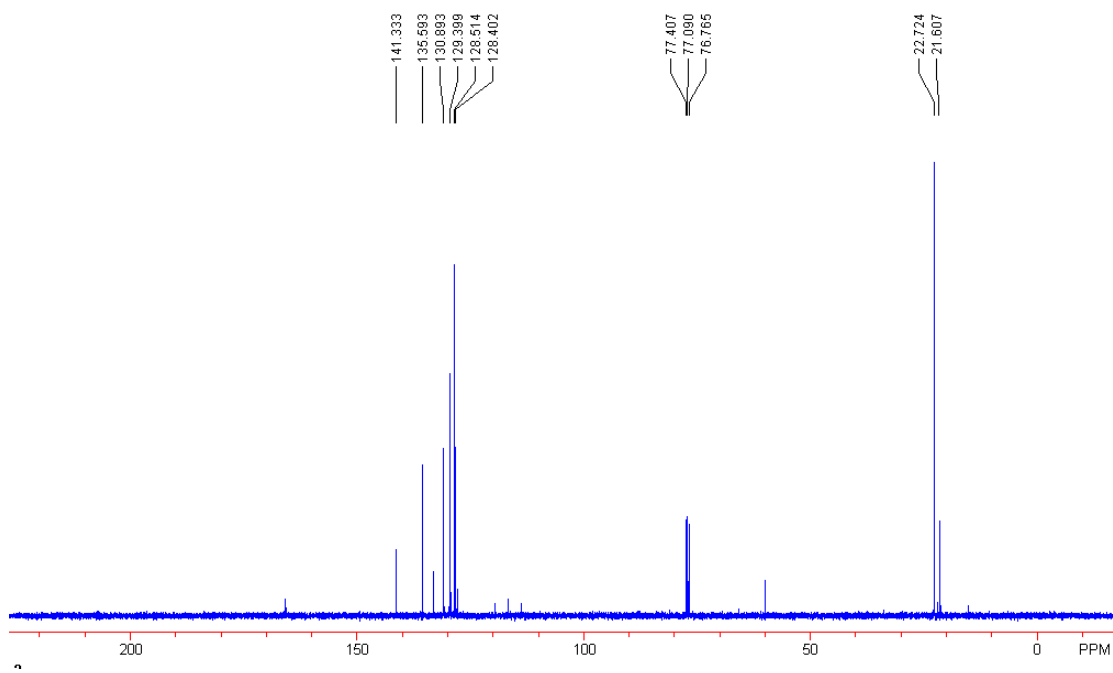

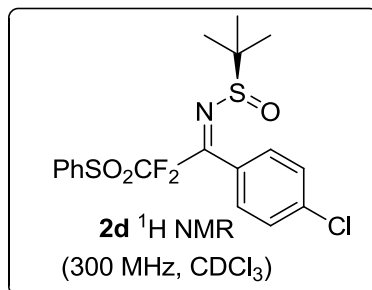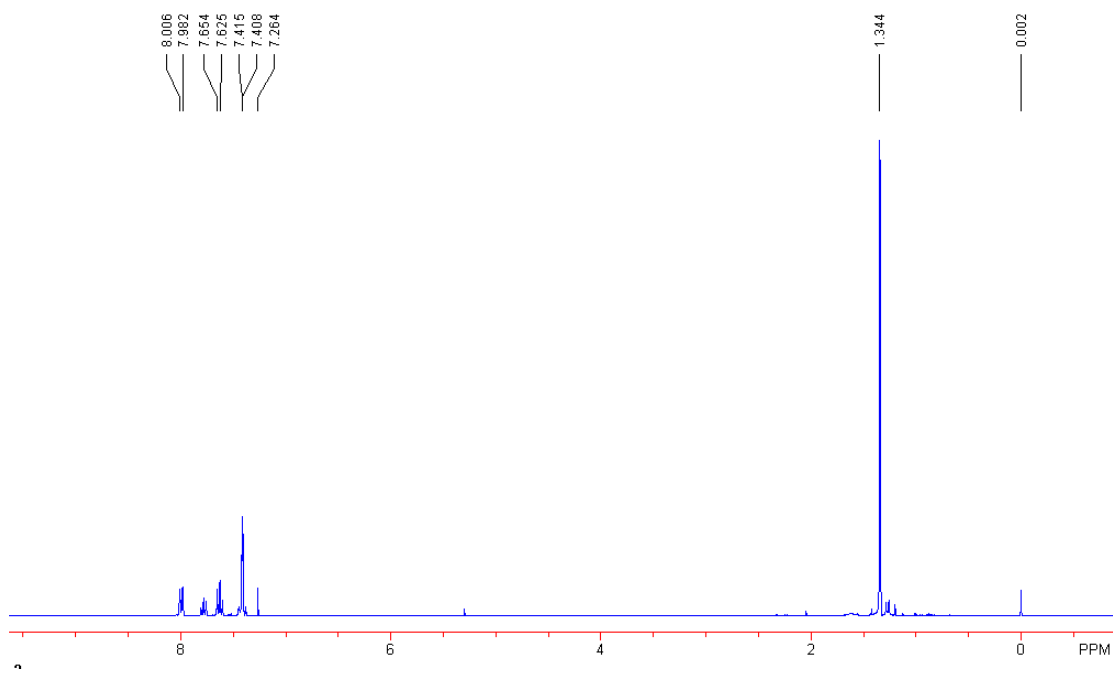

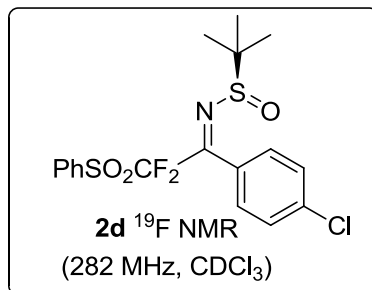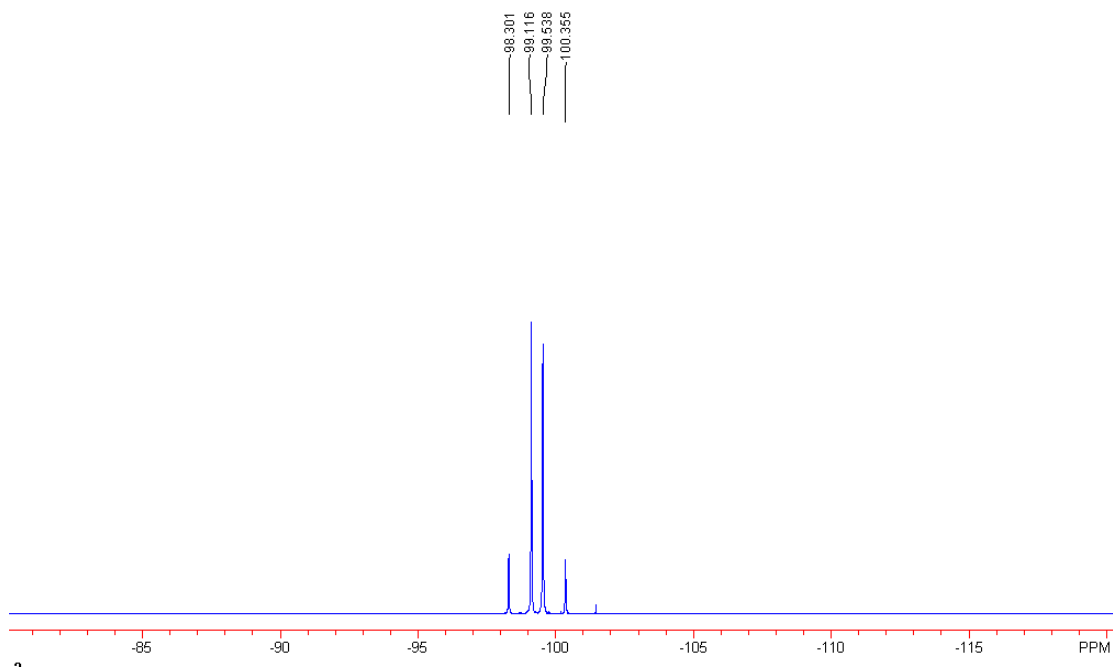



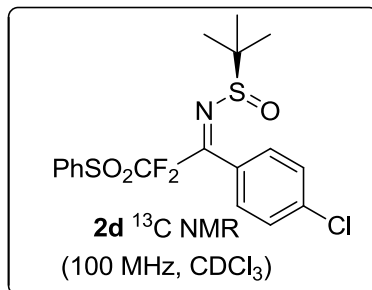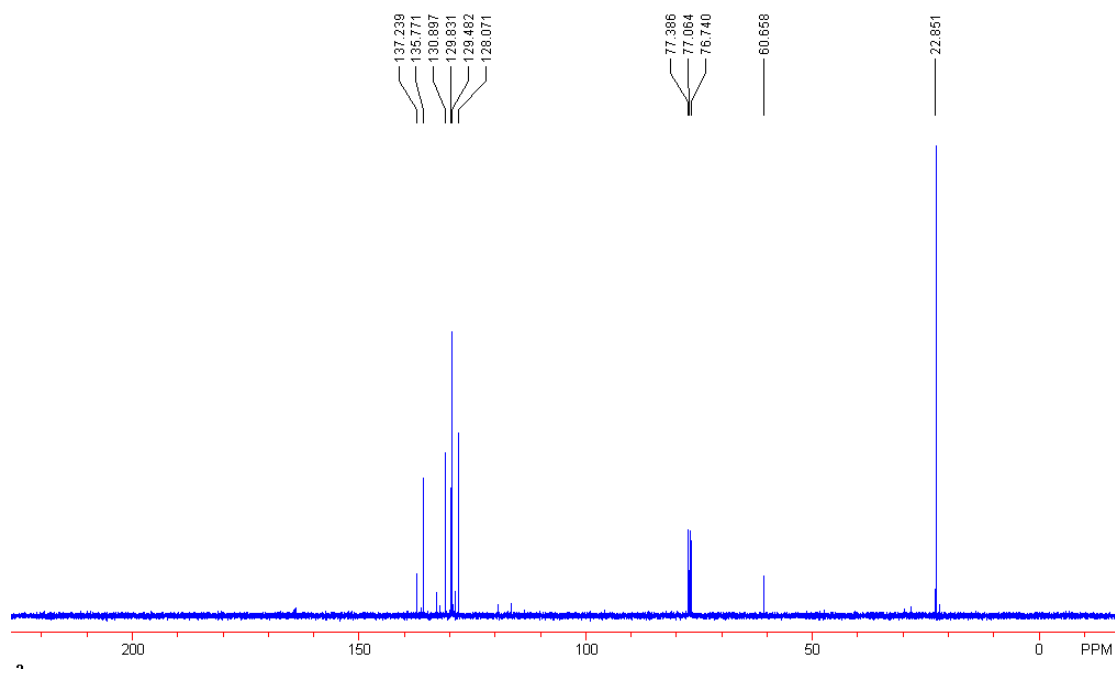

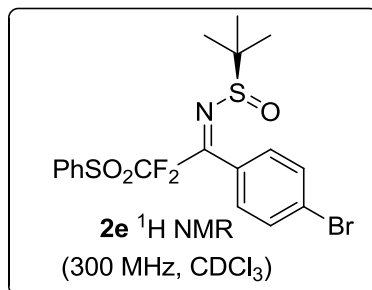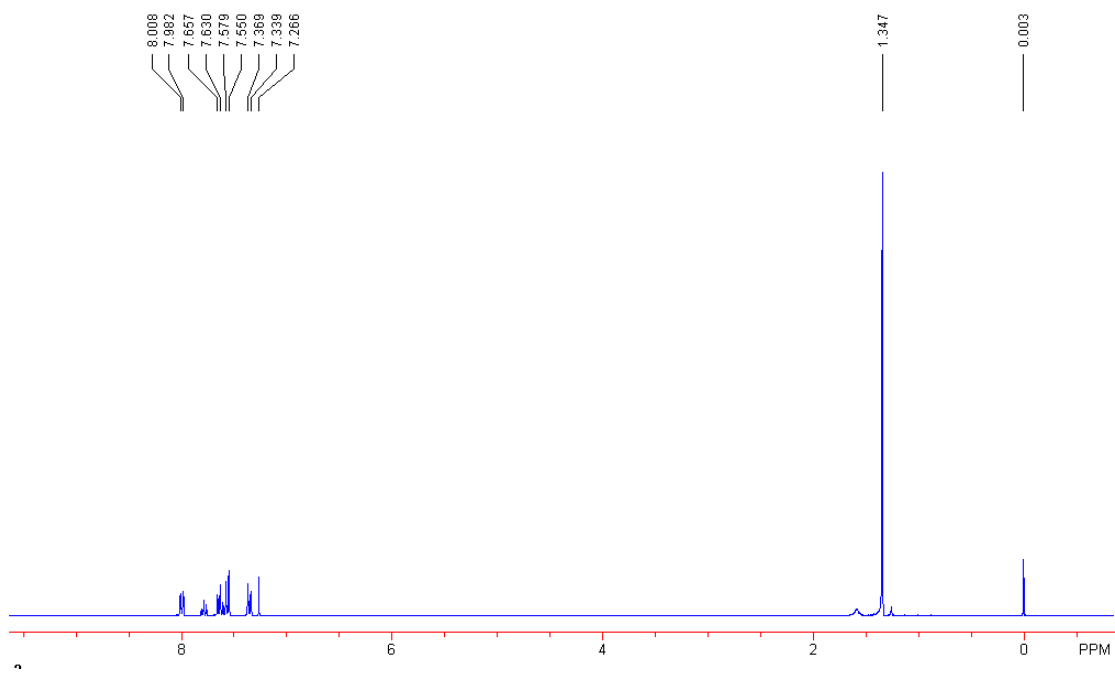

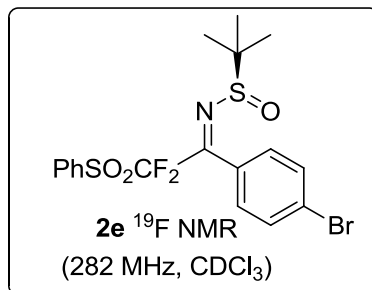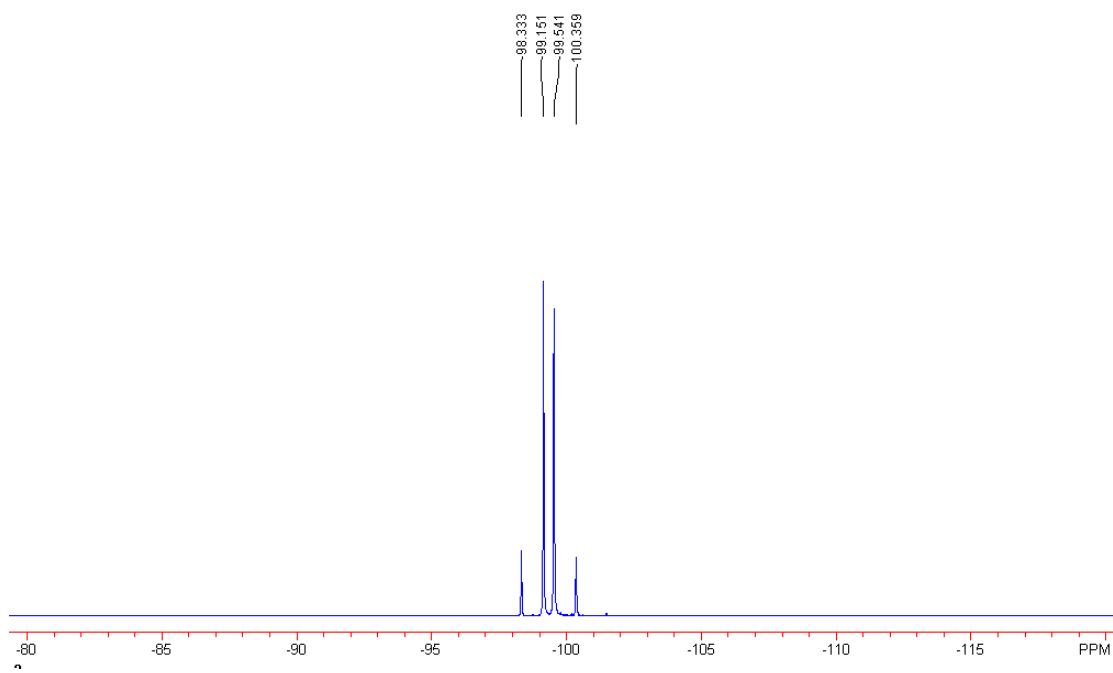

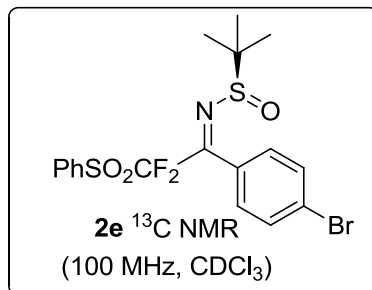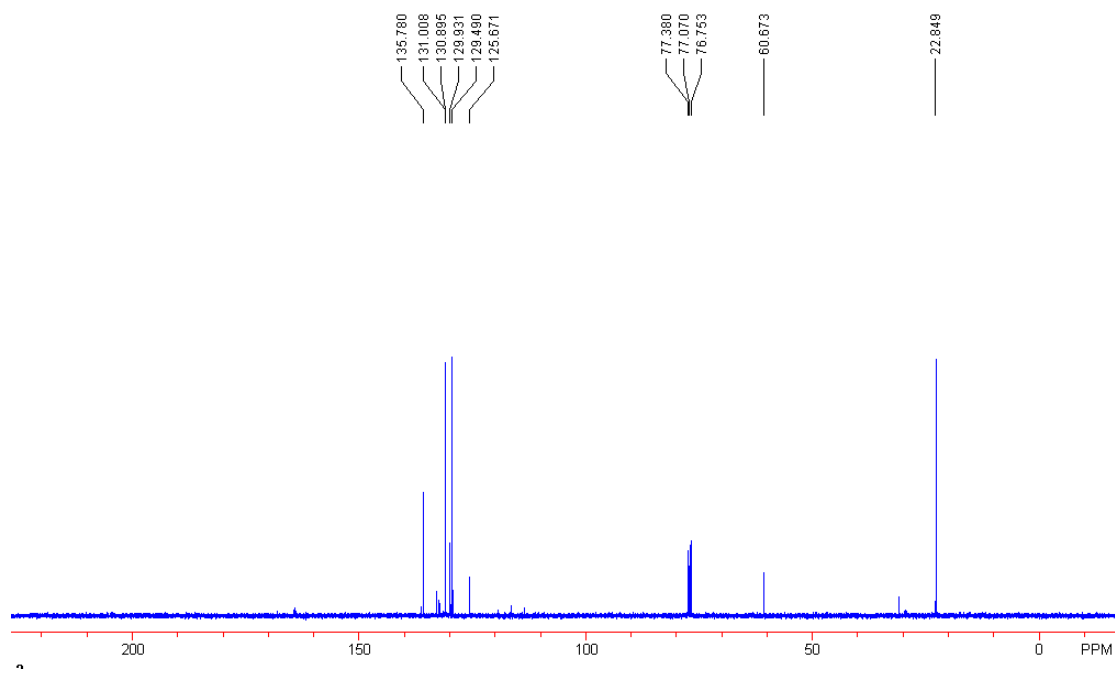

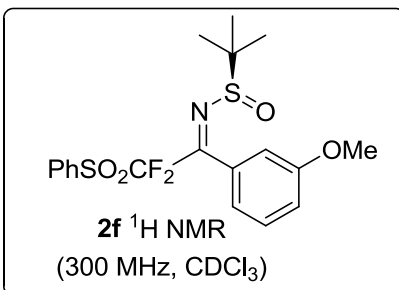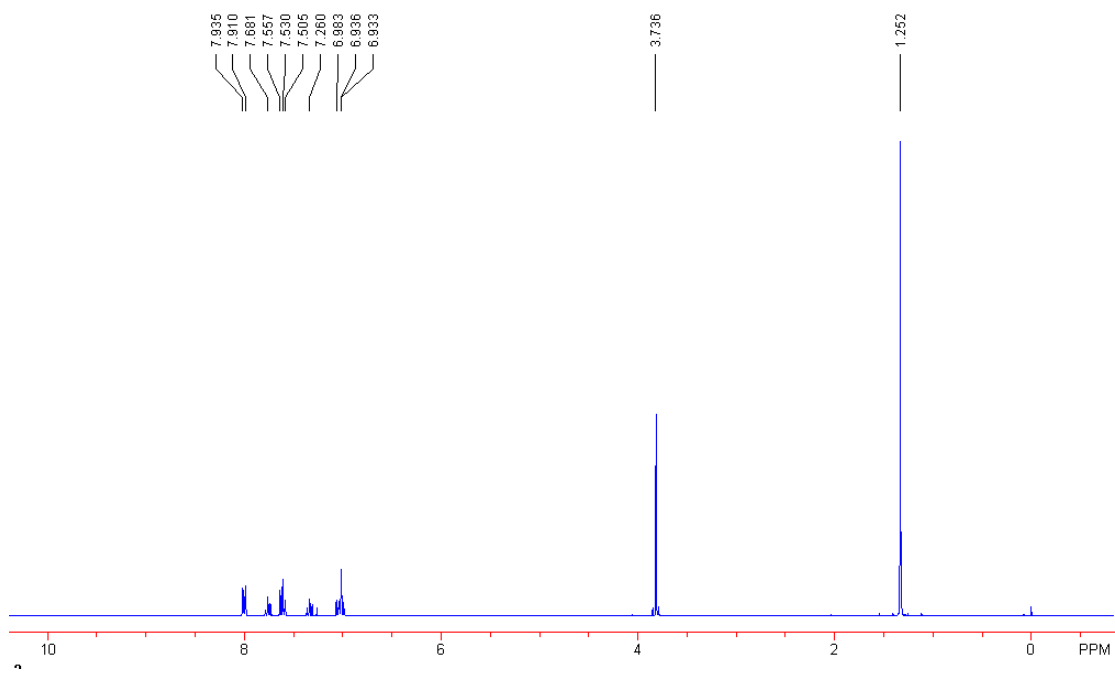

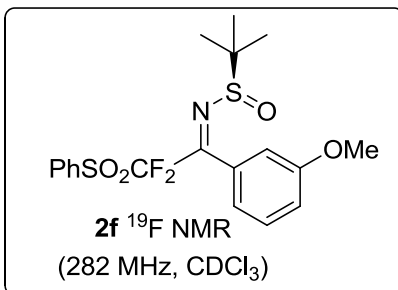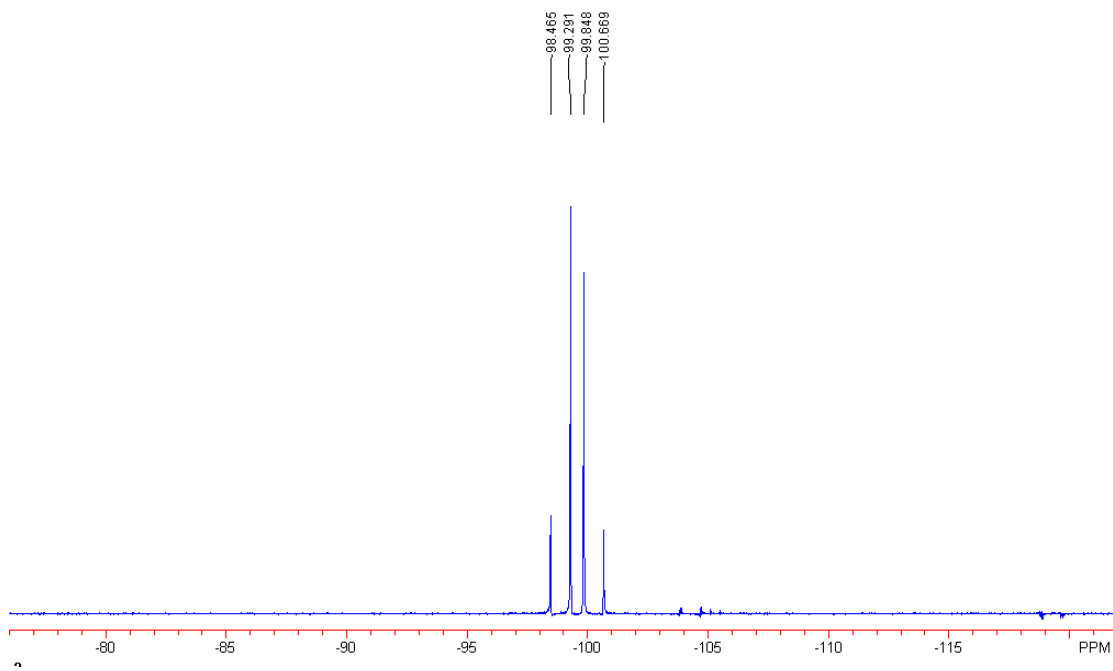

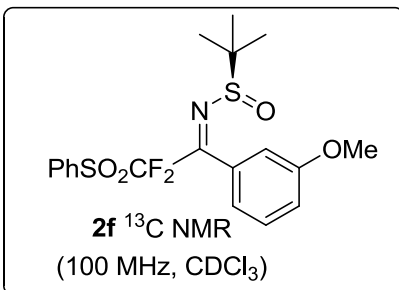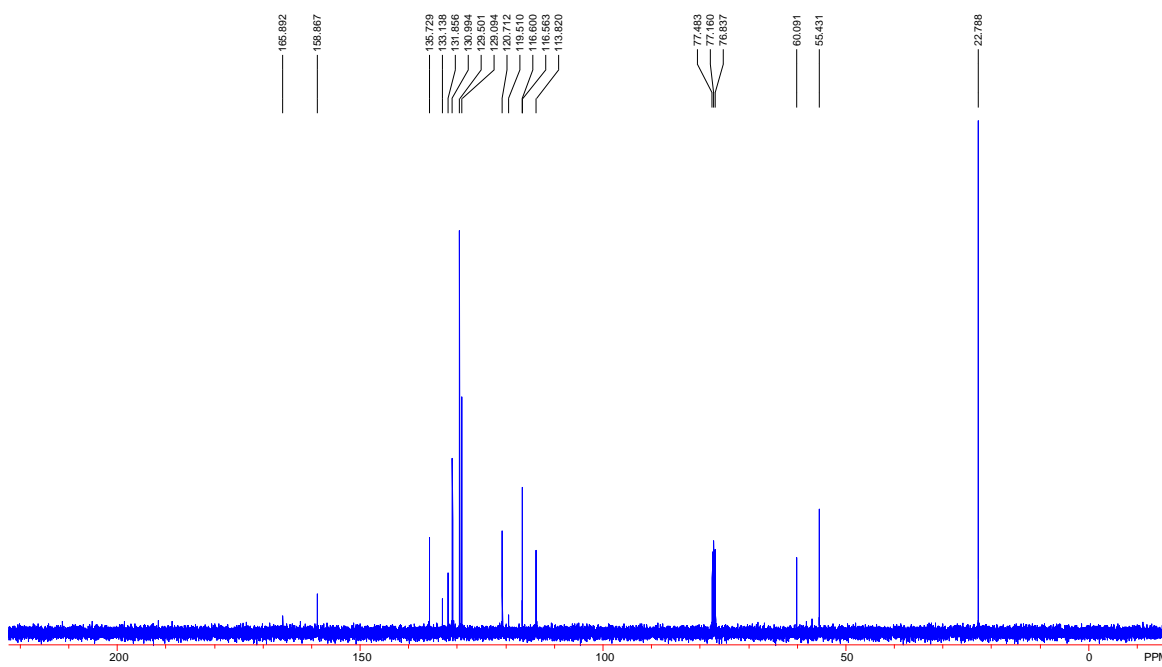

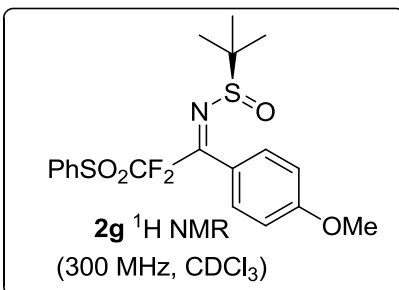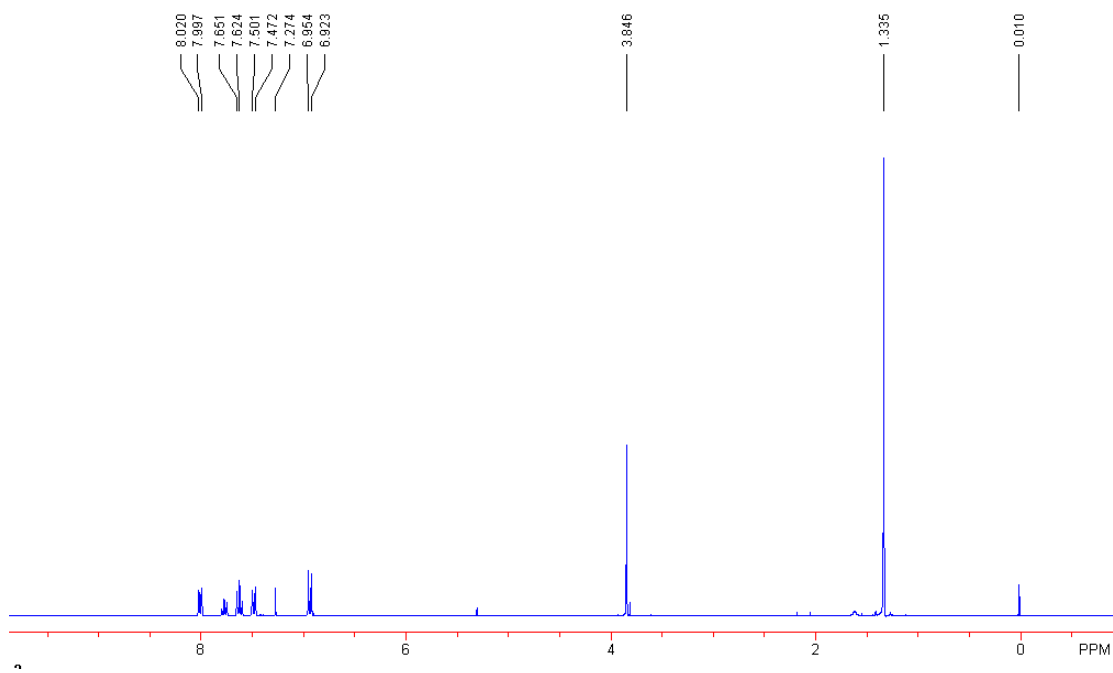



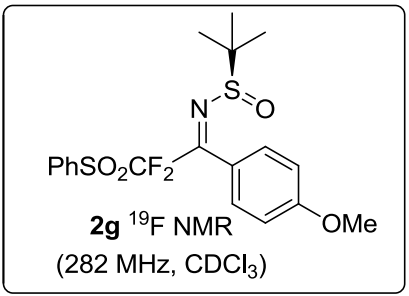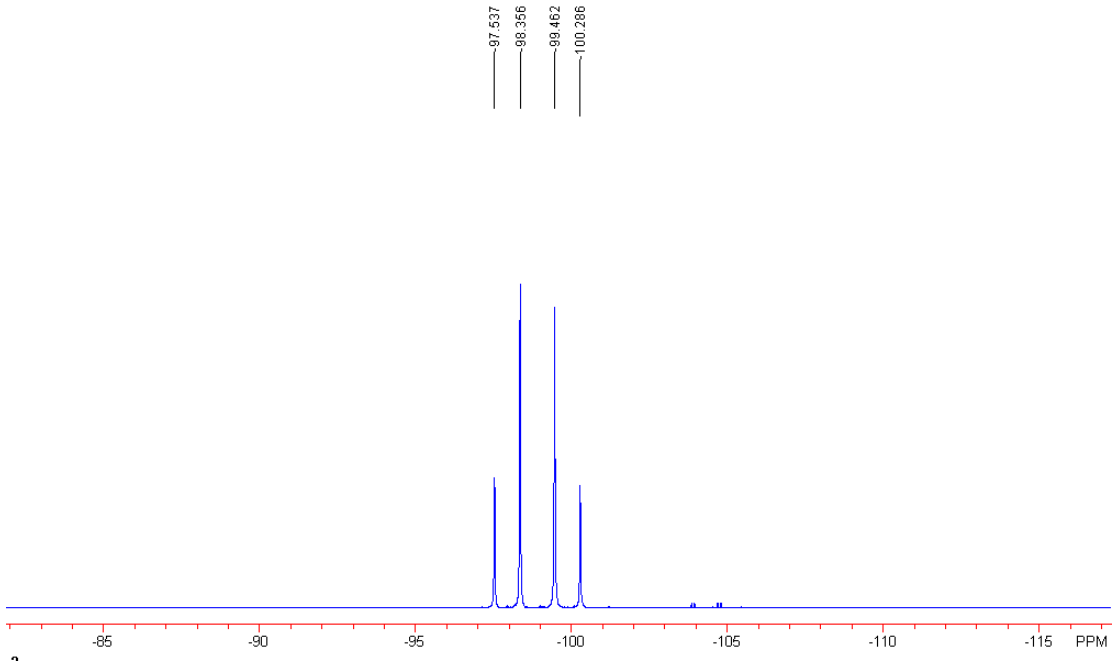

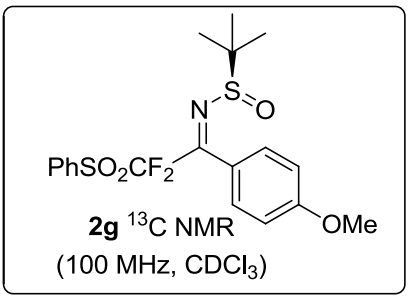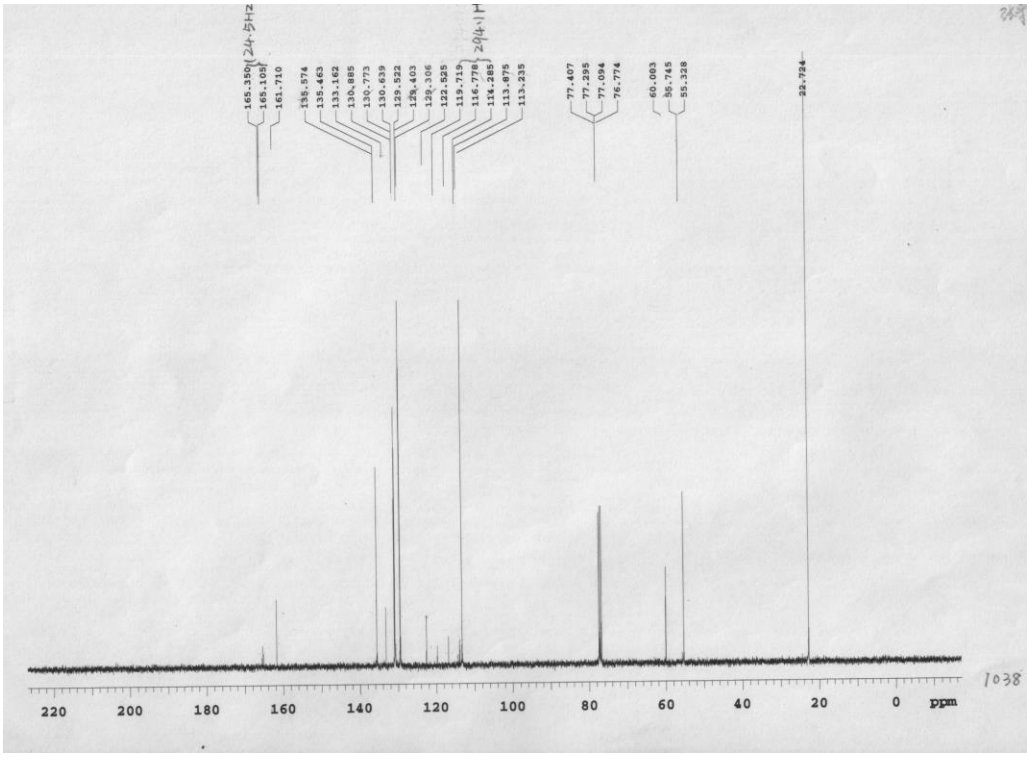

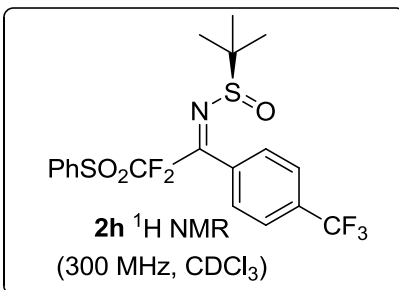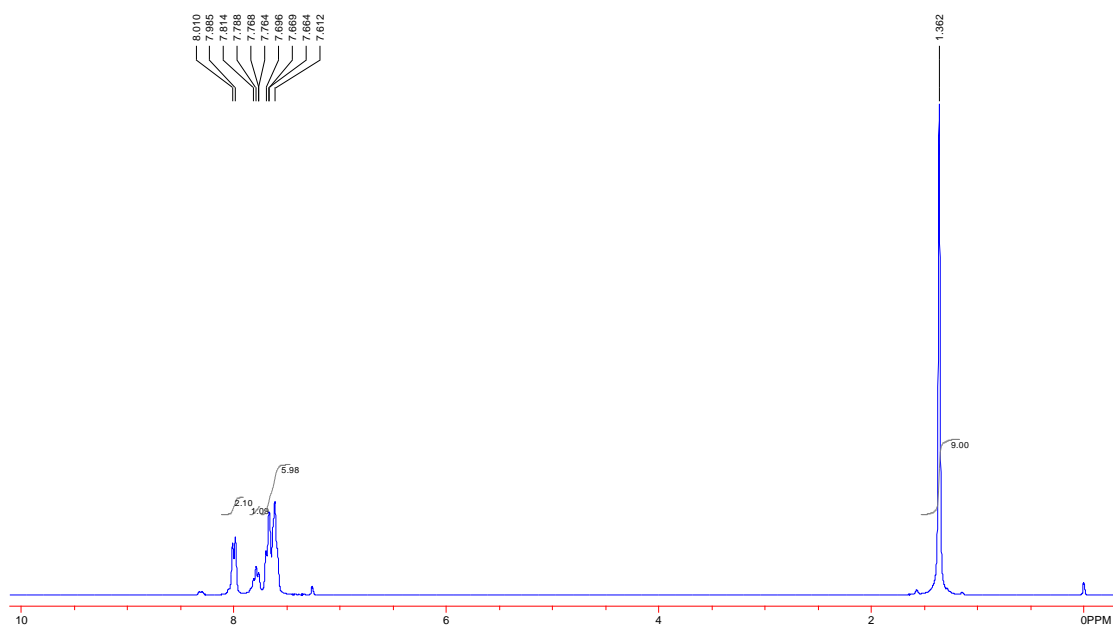

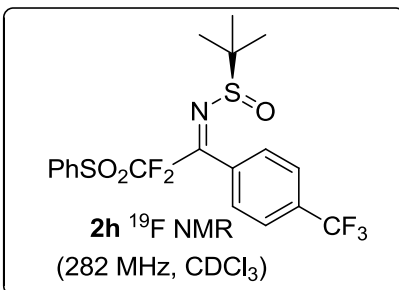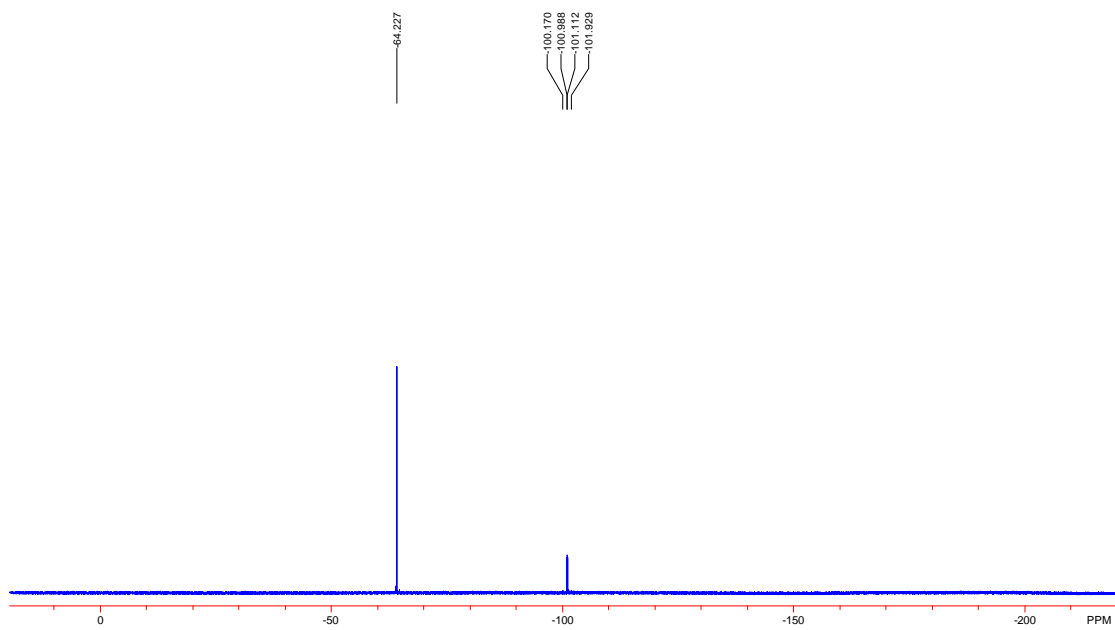

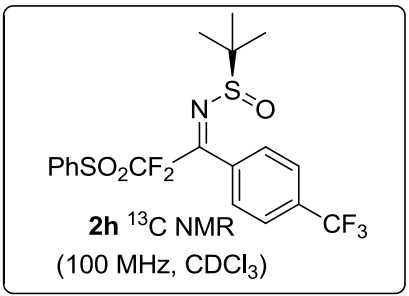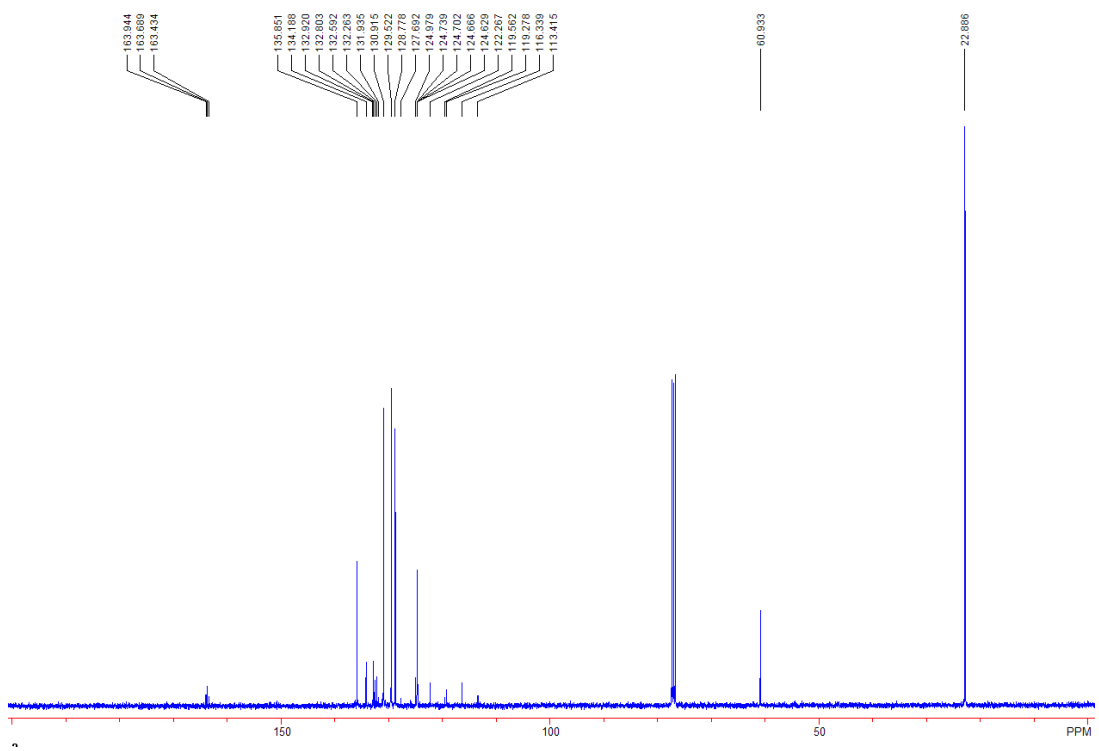

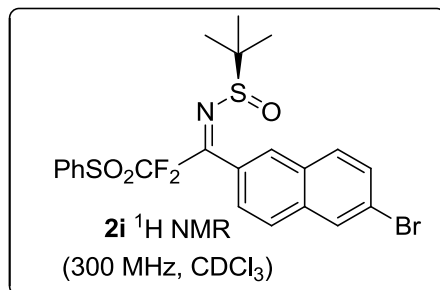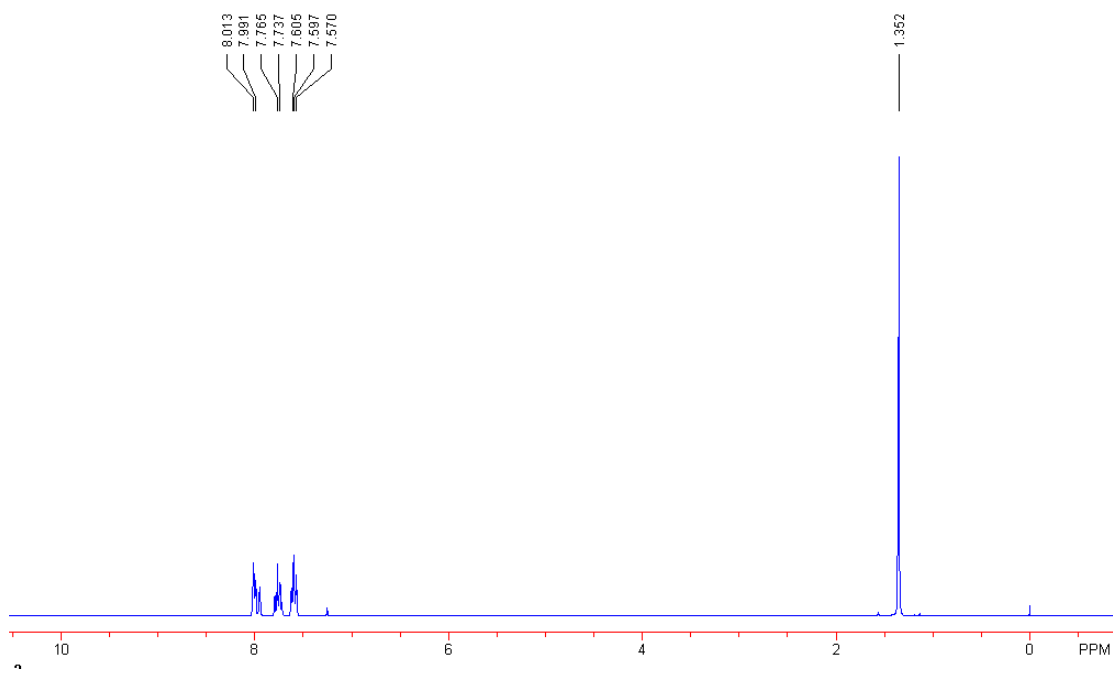

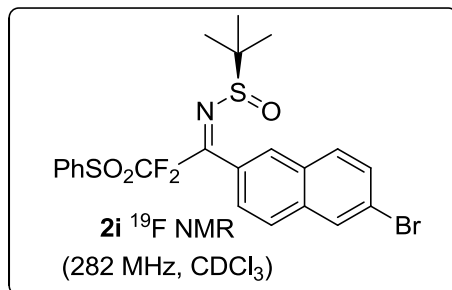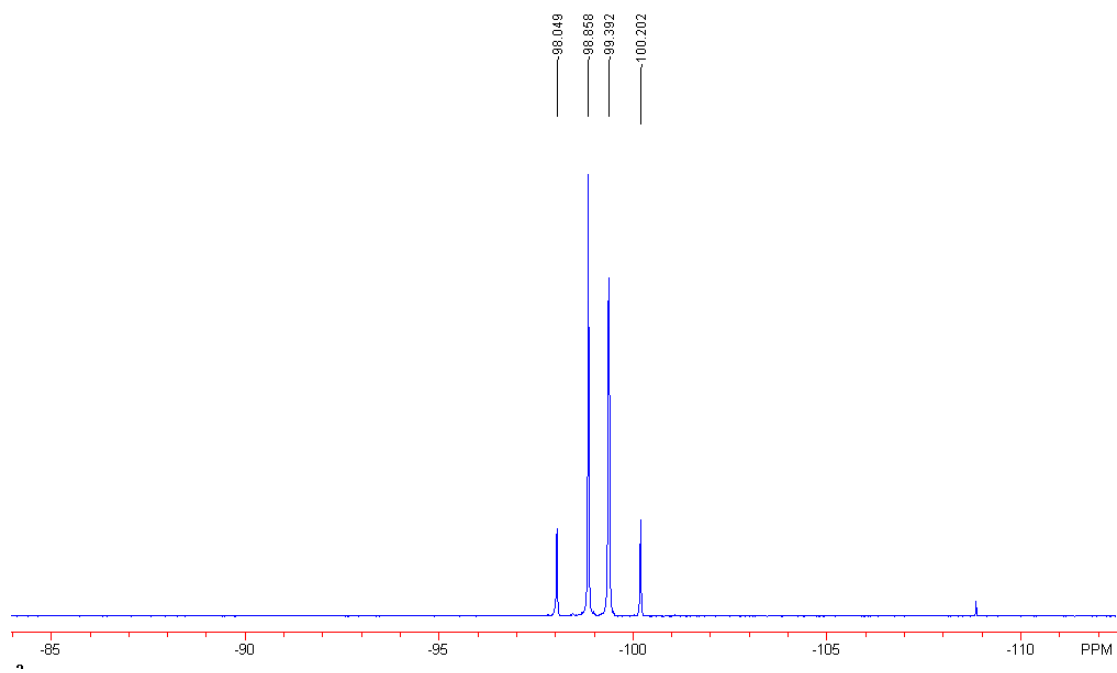

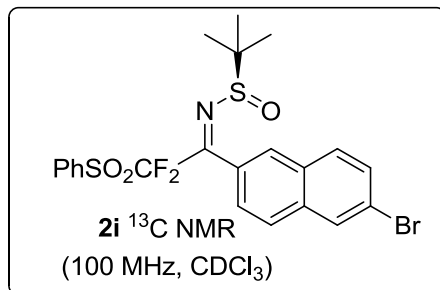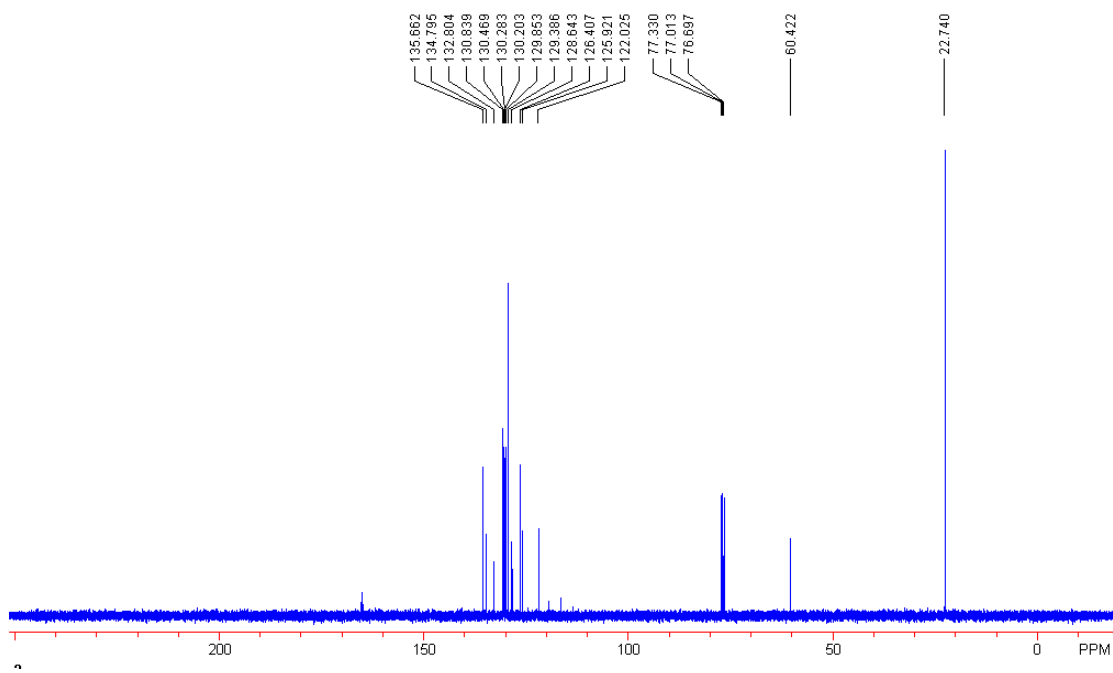



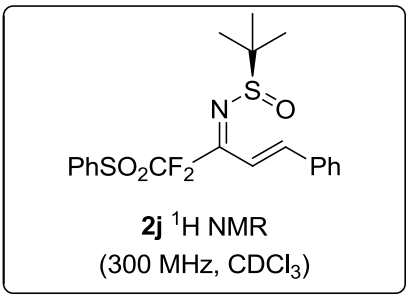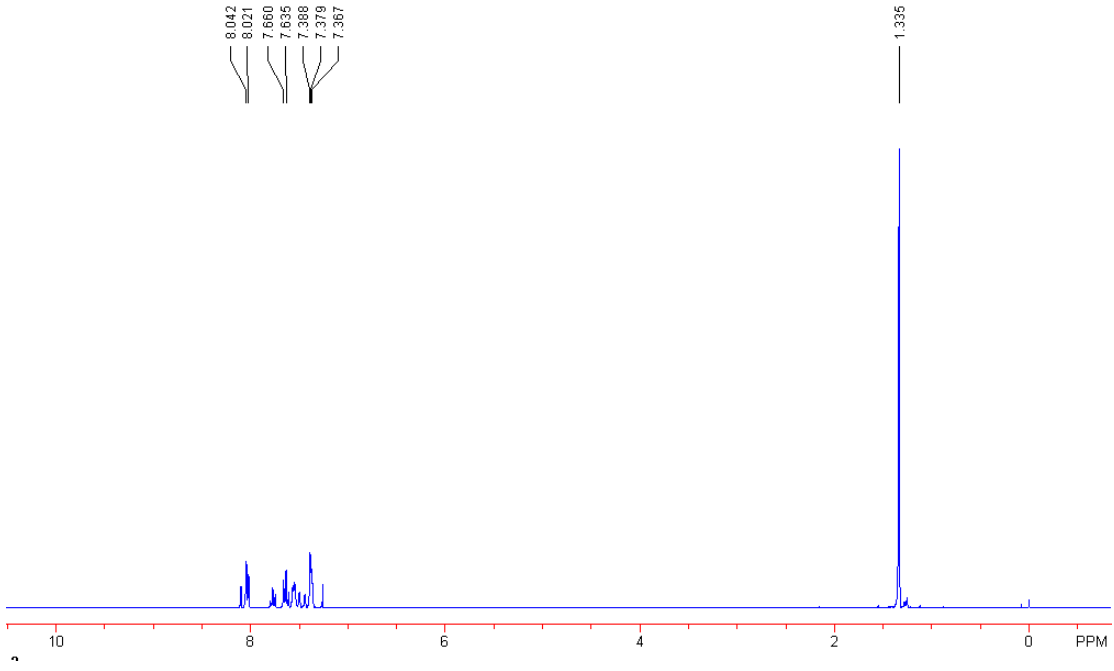

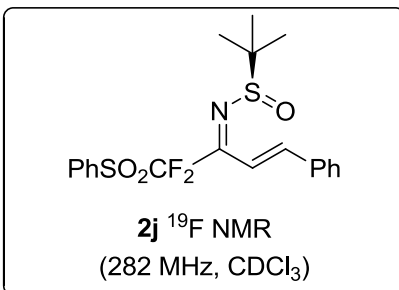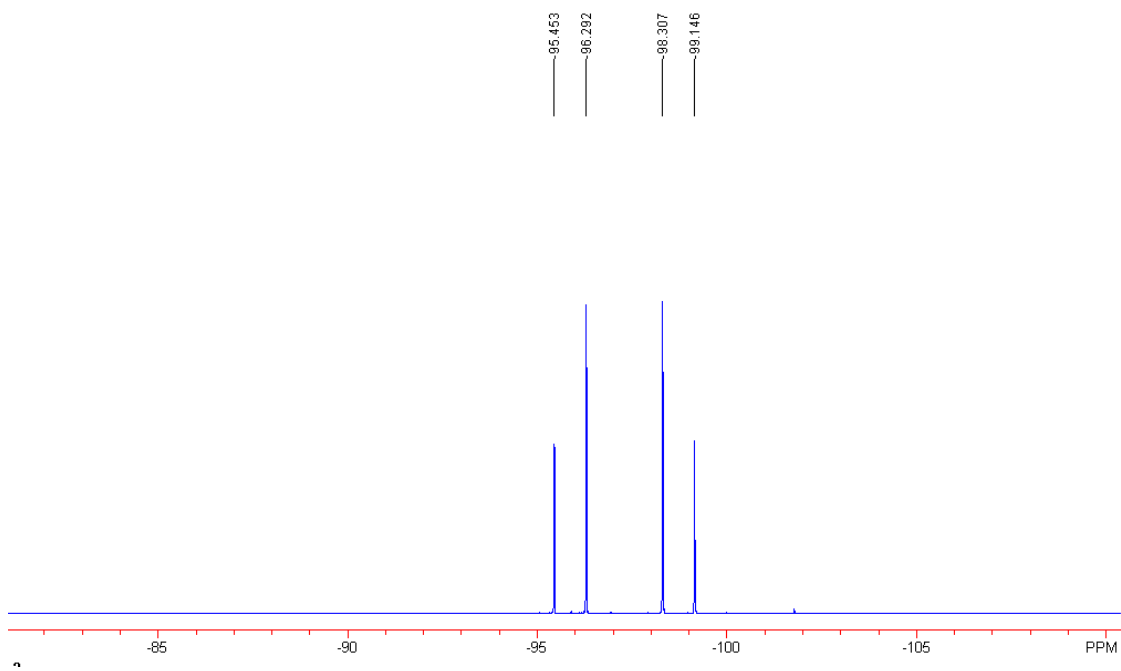

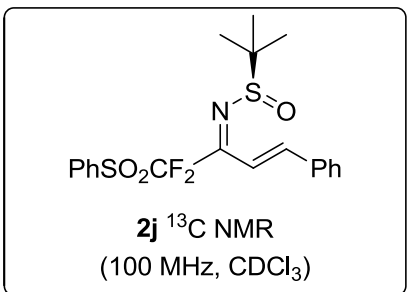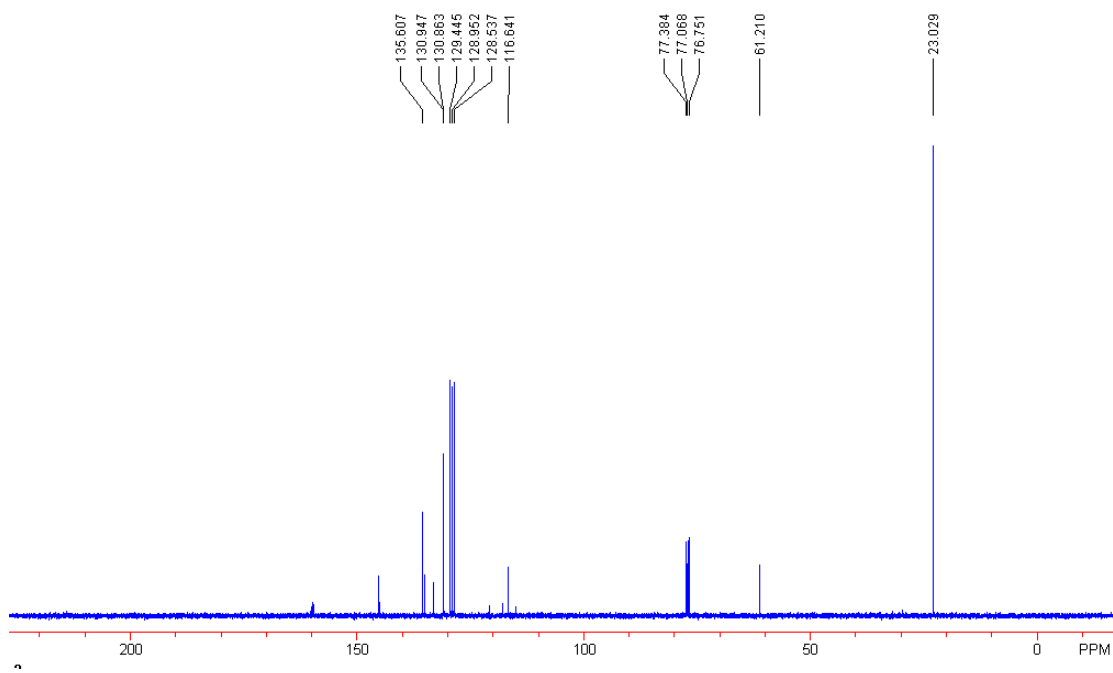

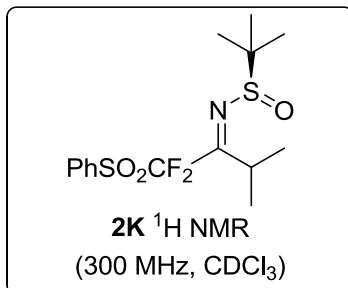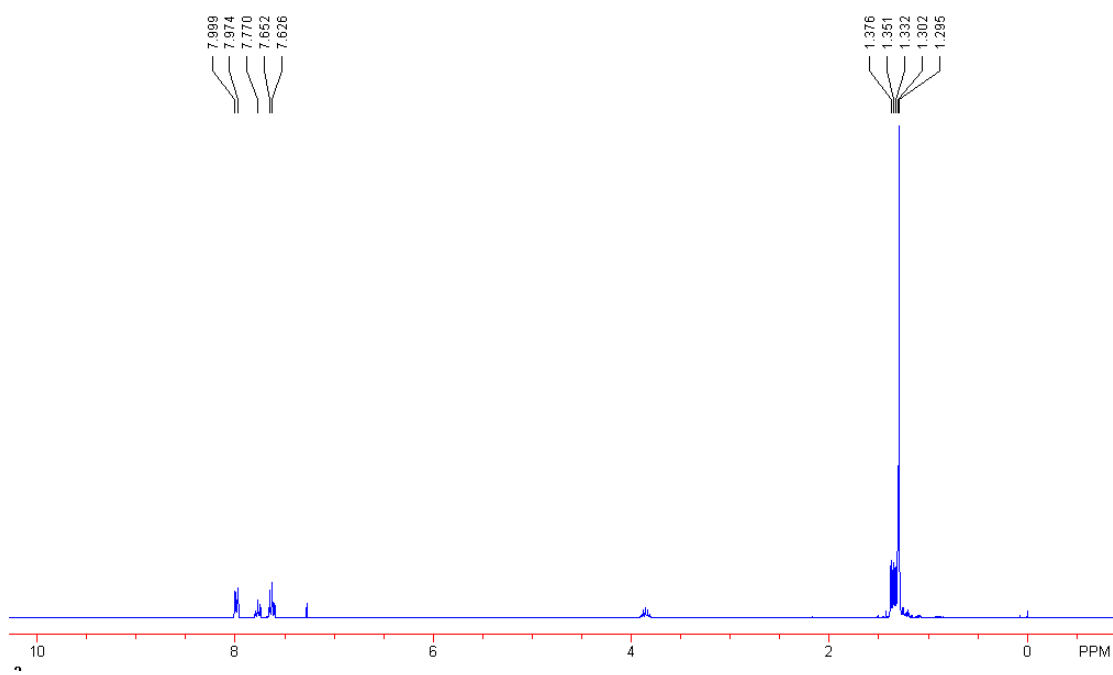

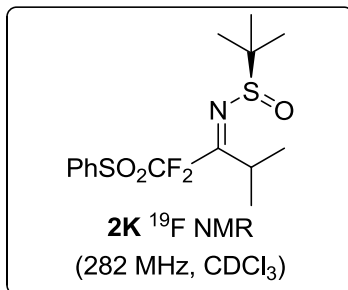

96.151  
96.984  
100.290  
101.119

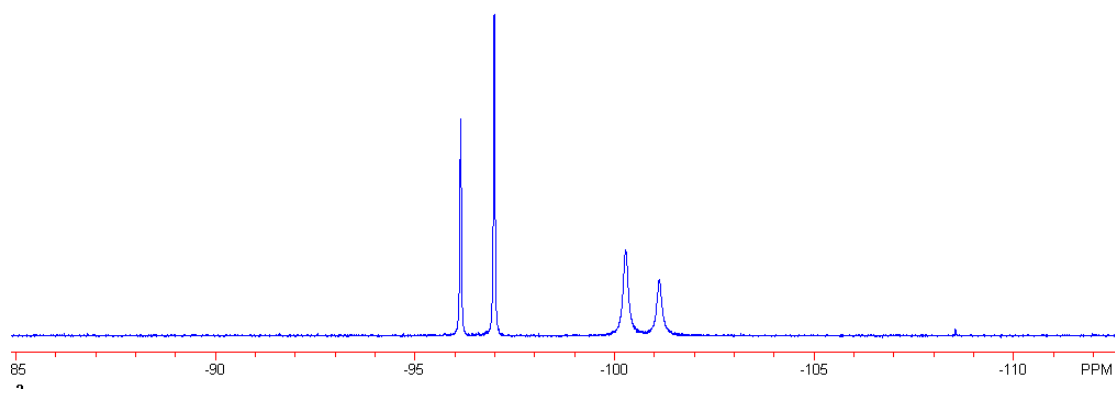

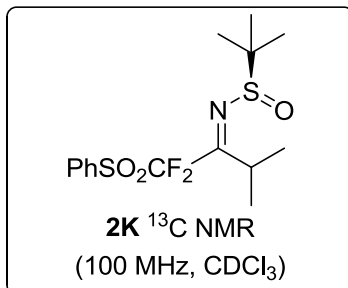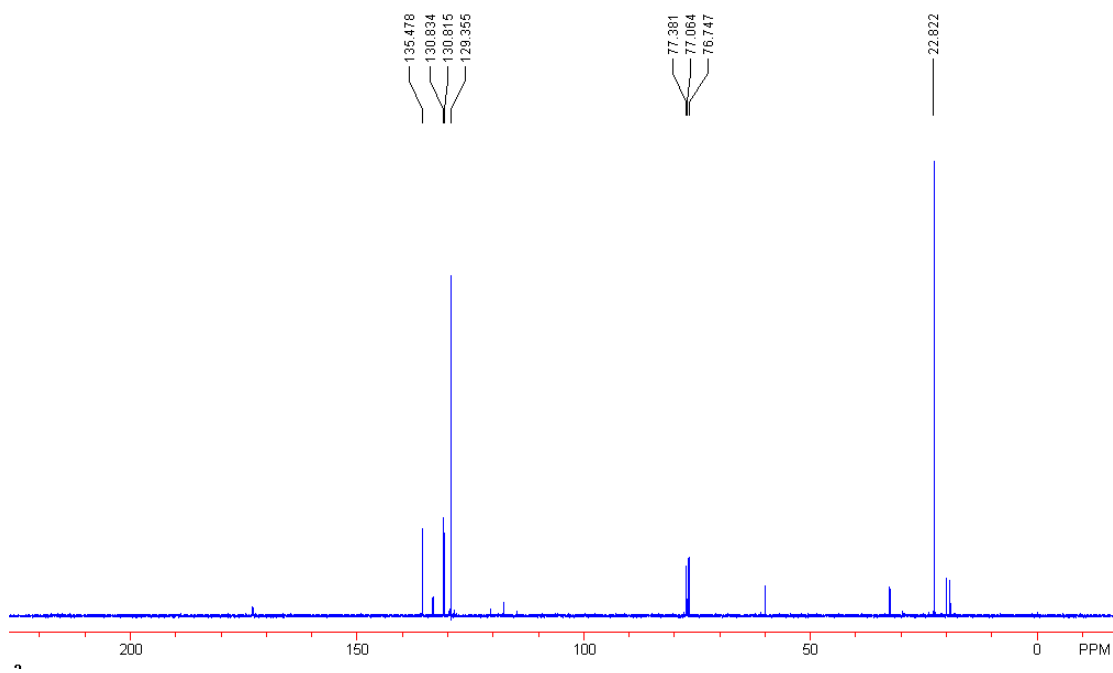

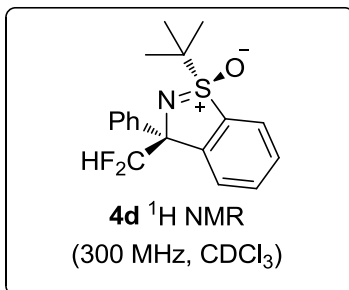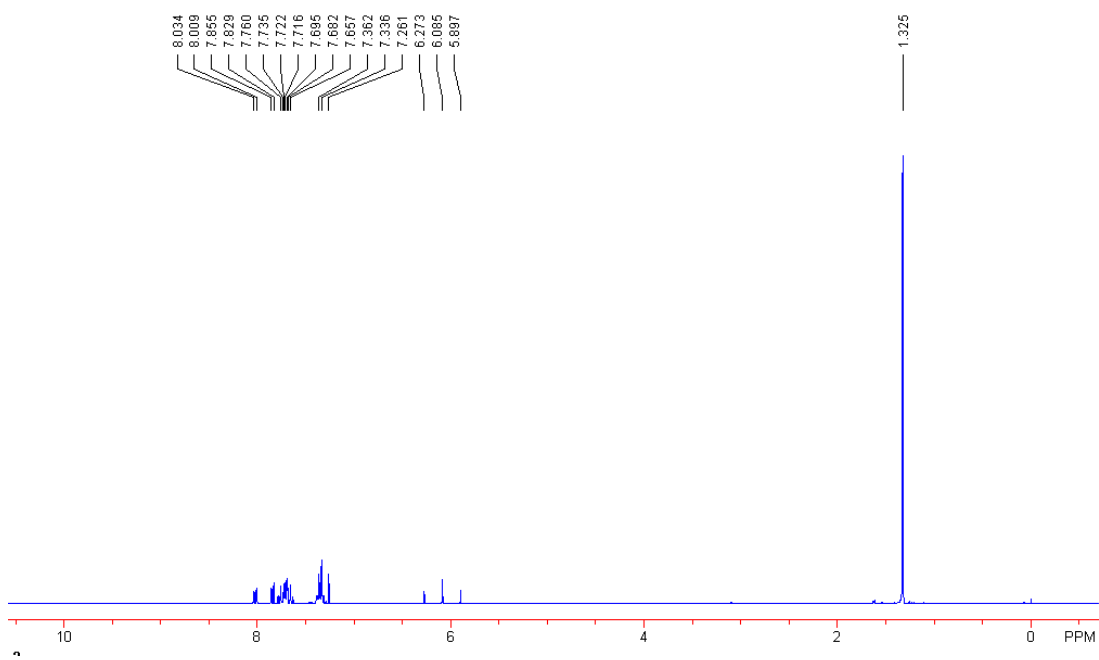

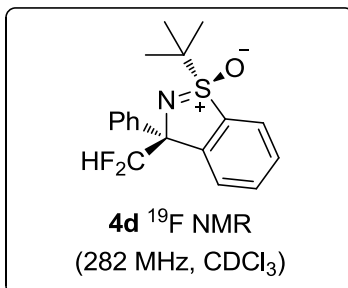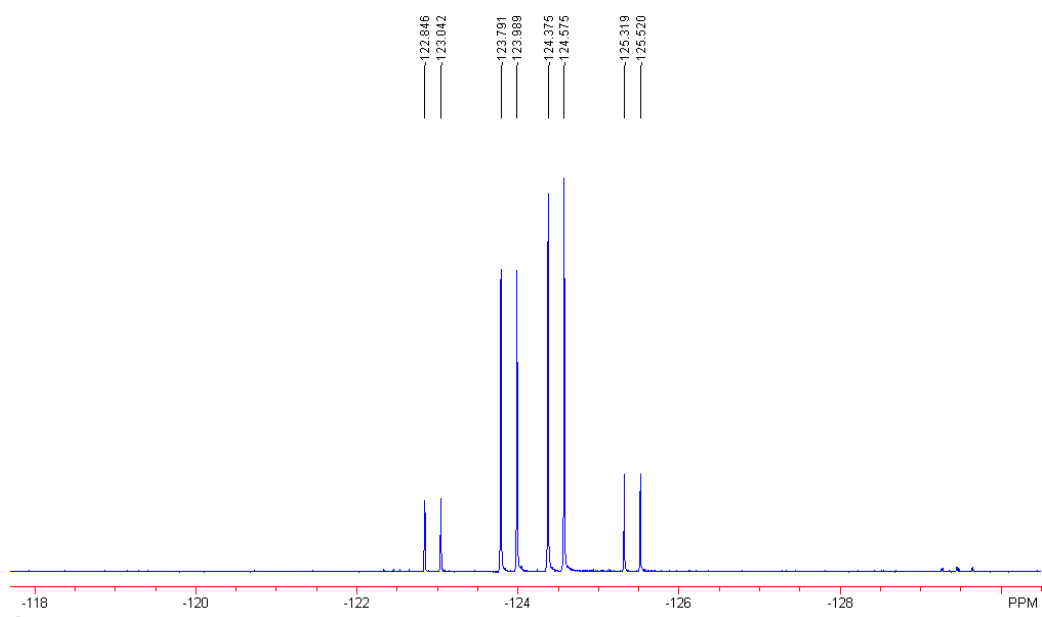



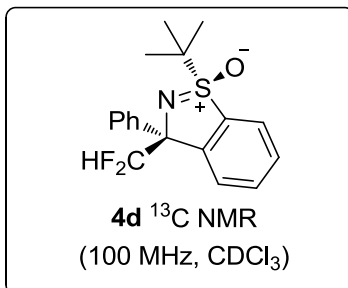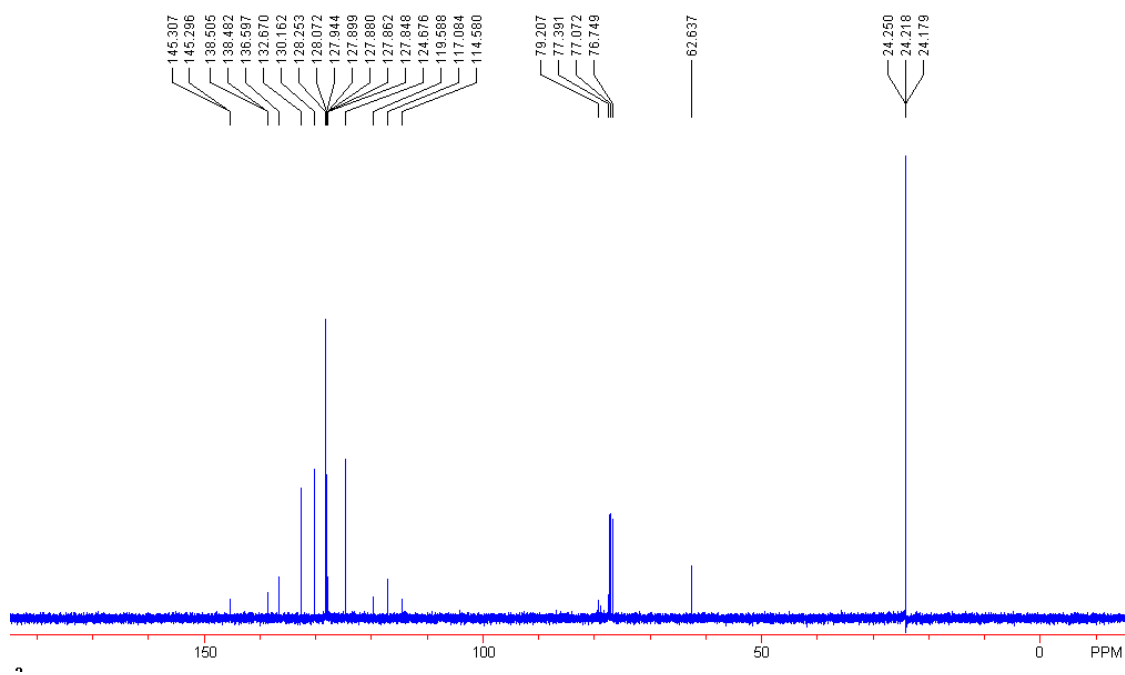

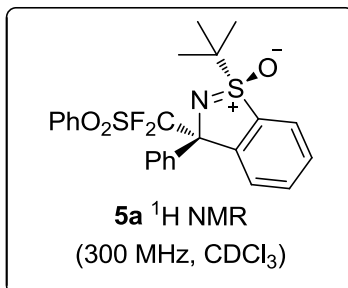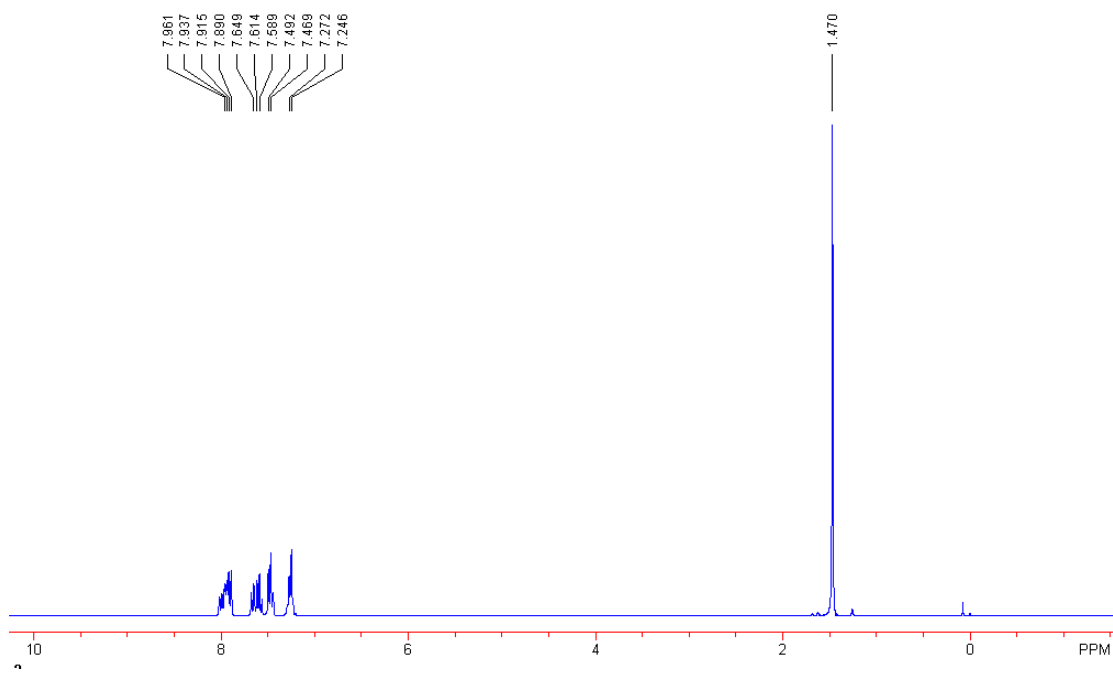

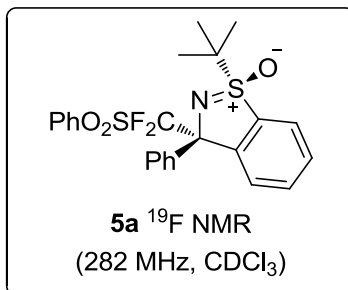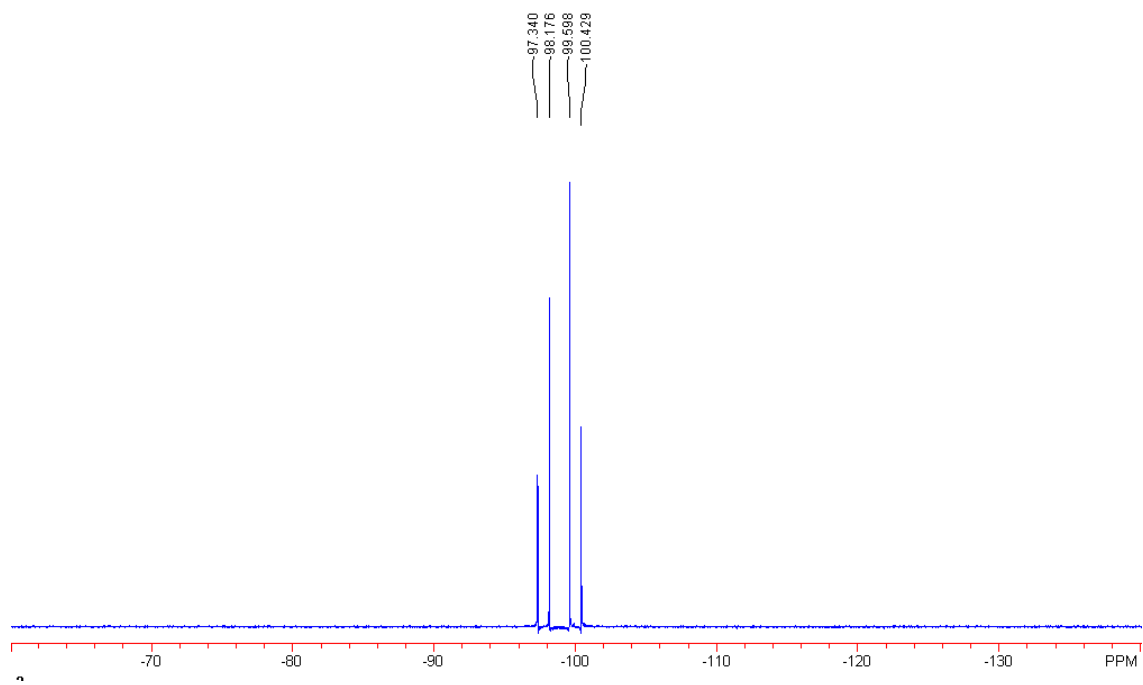

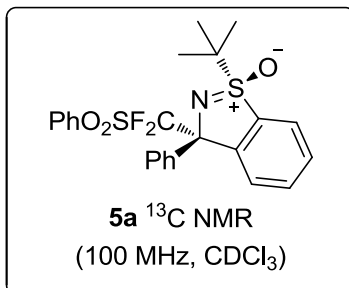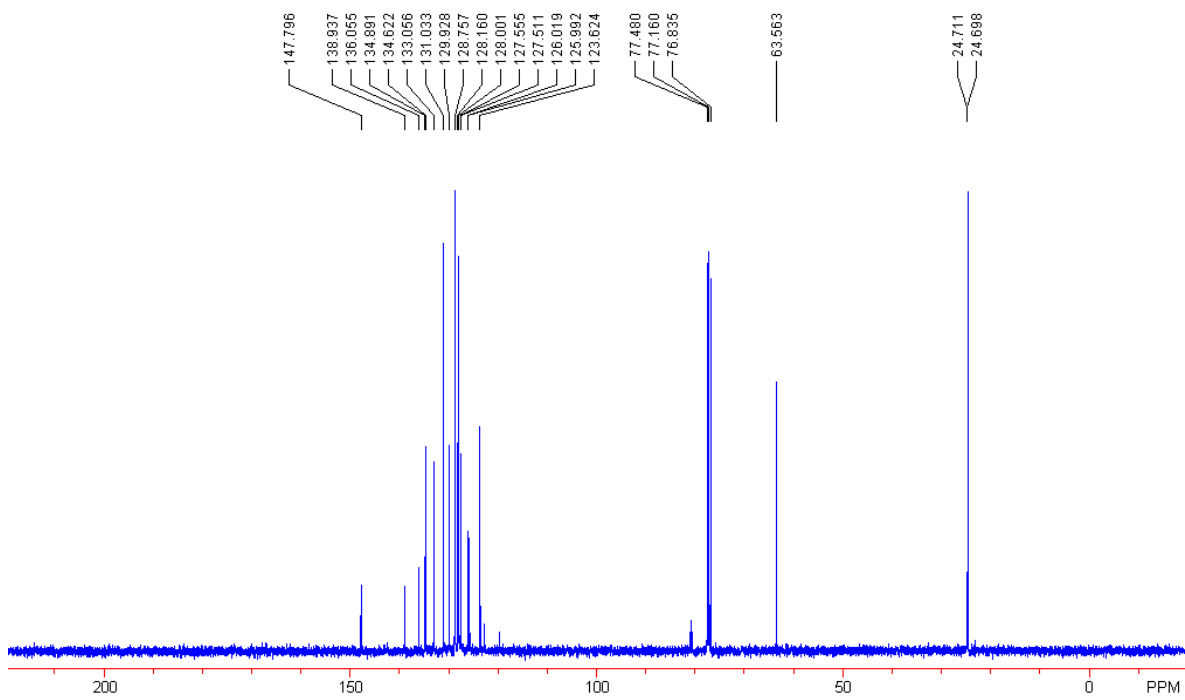

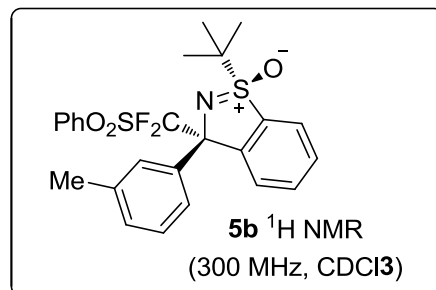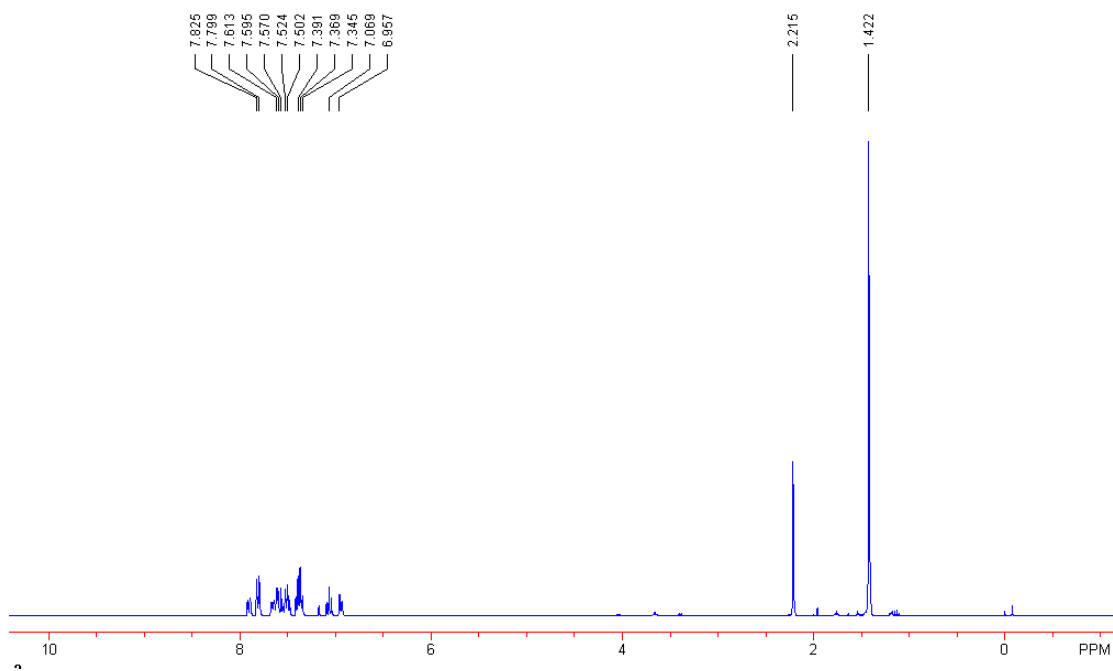

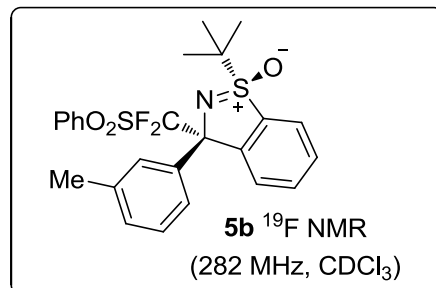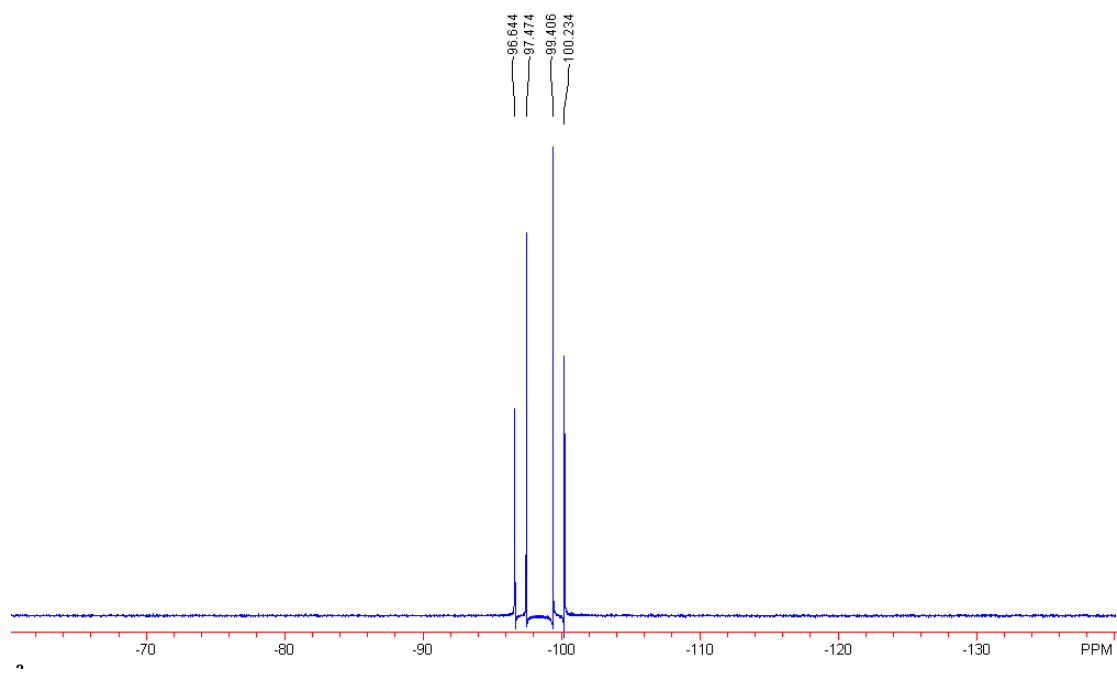

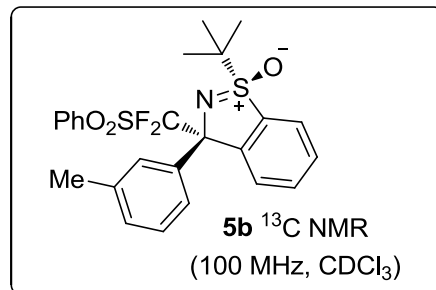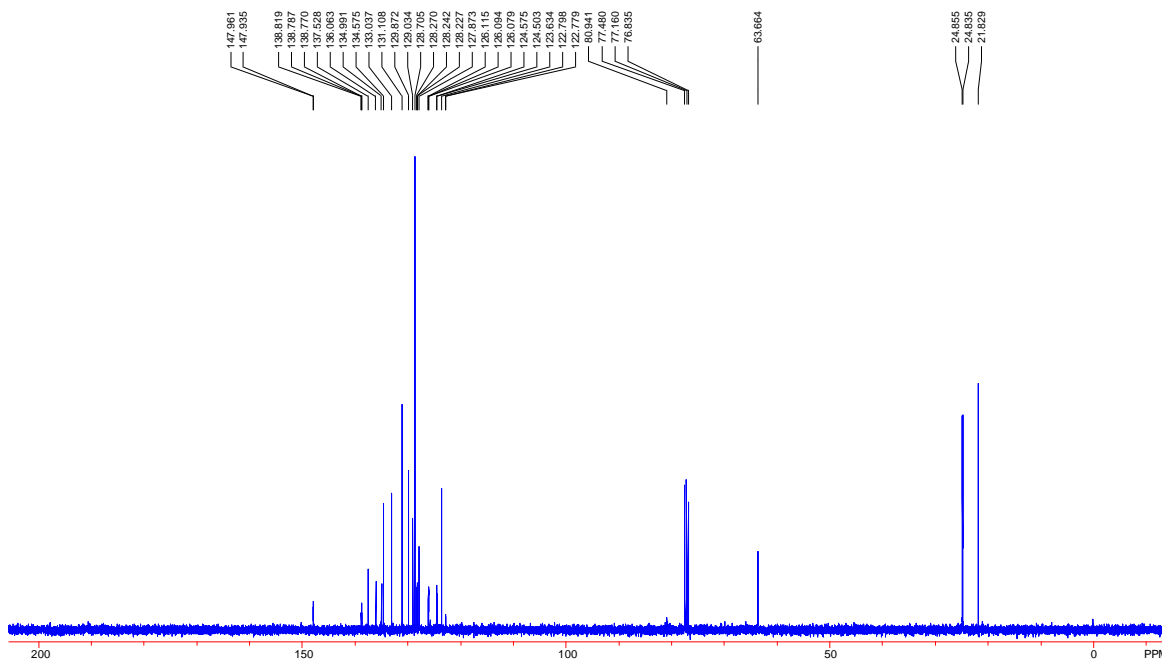

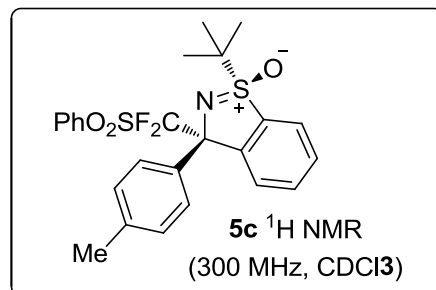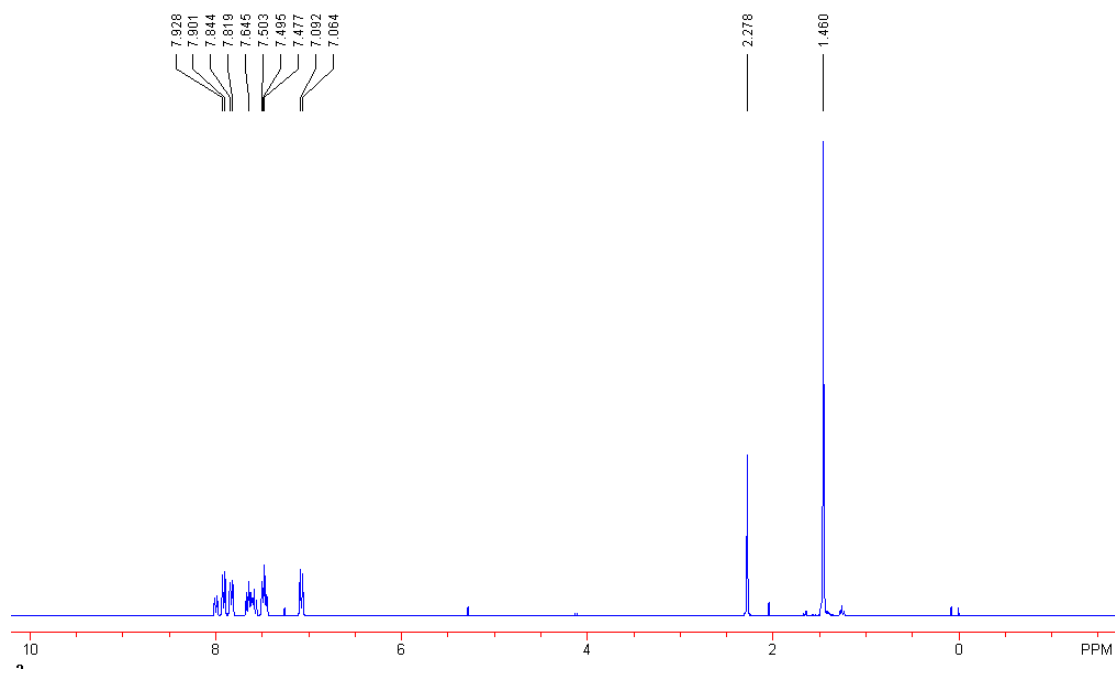



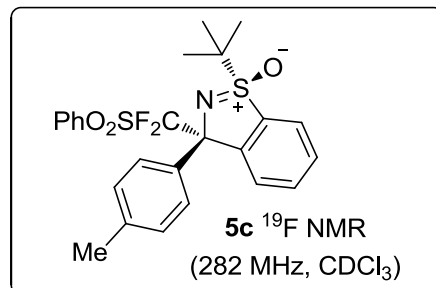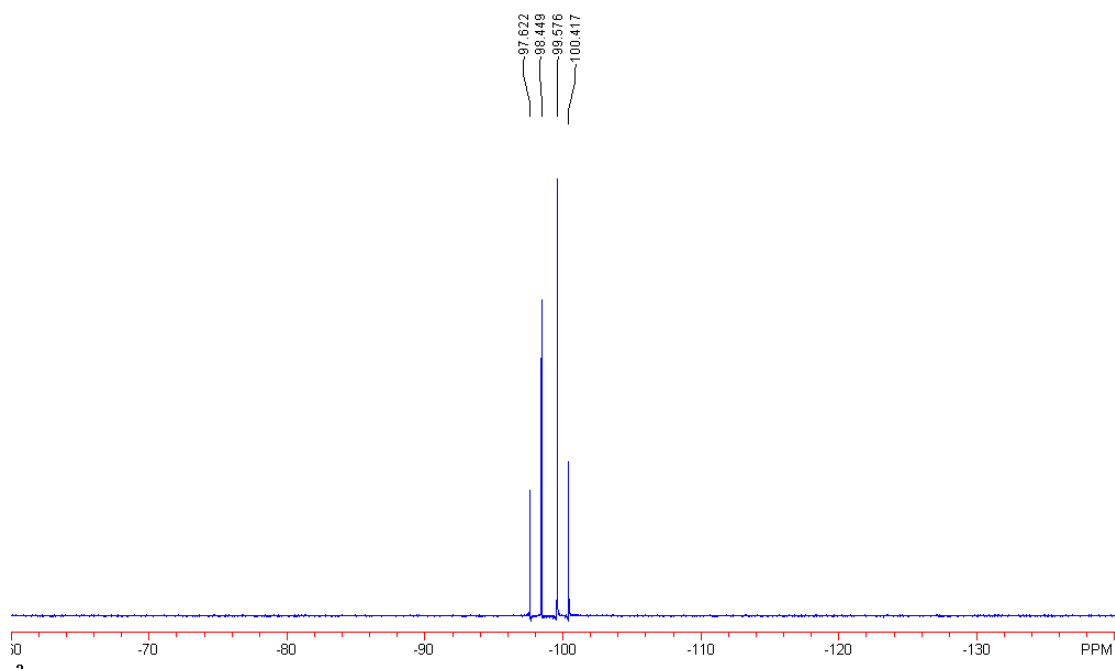

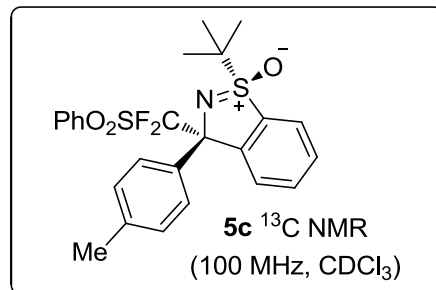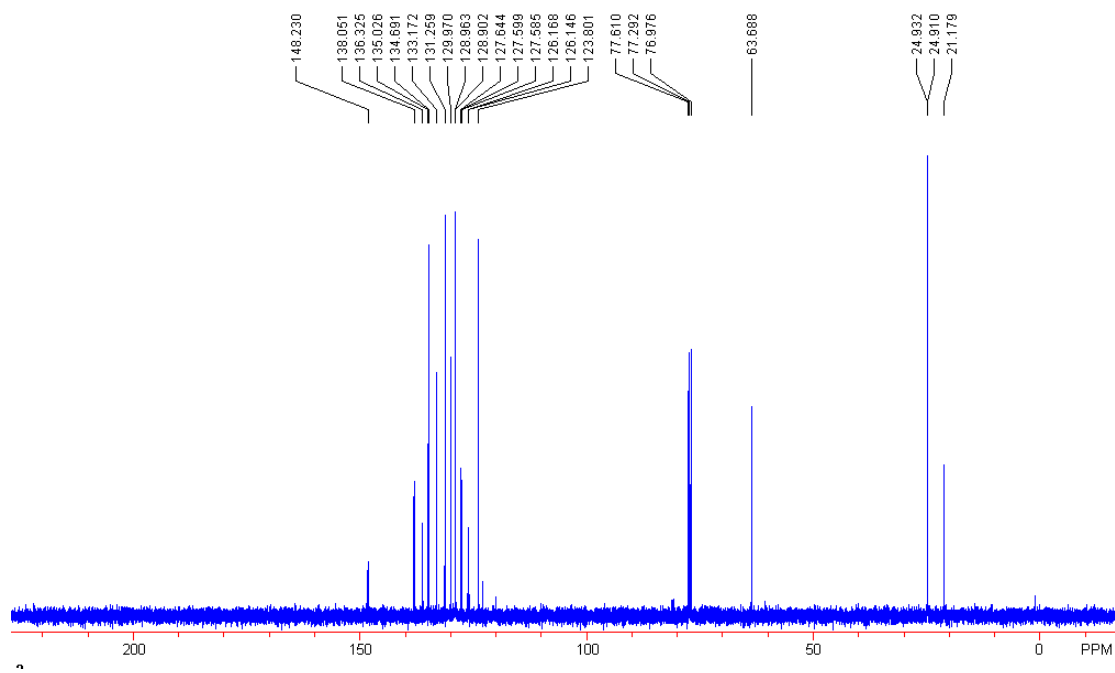

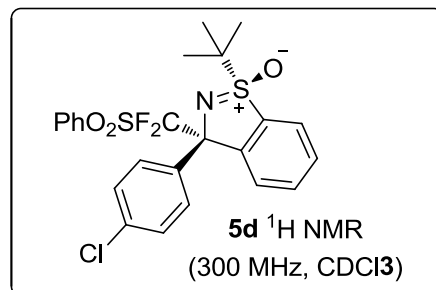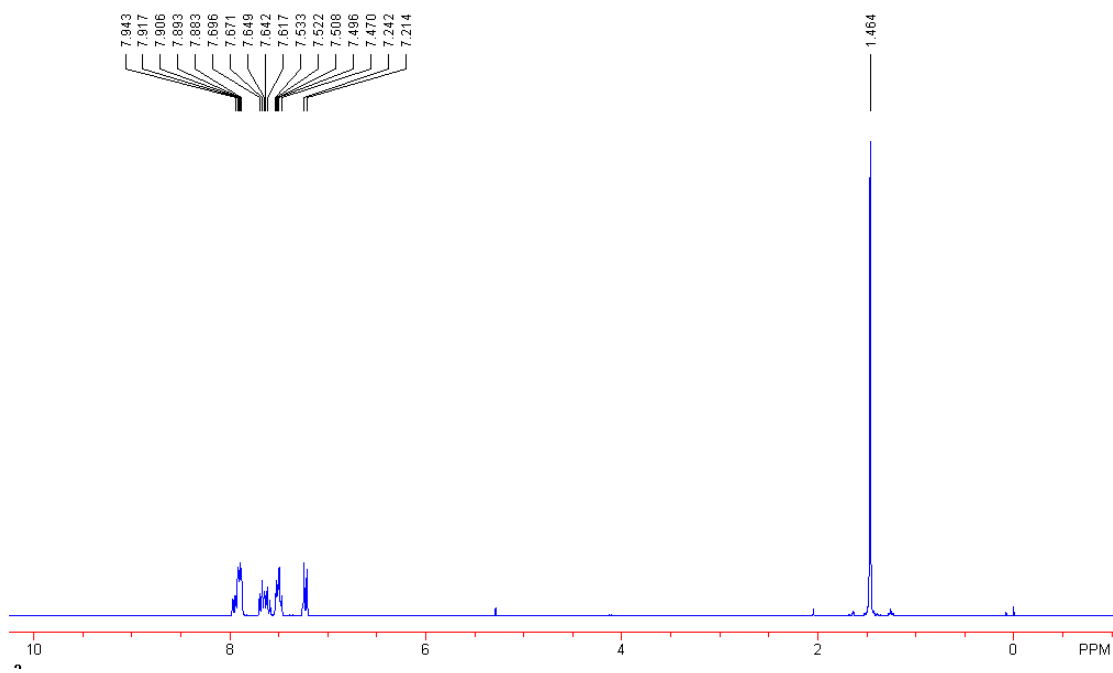

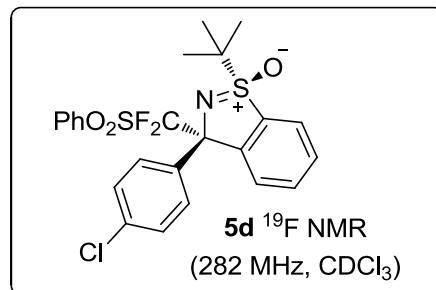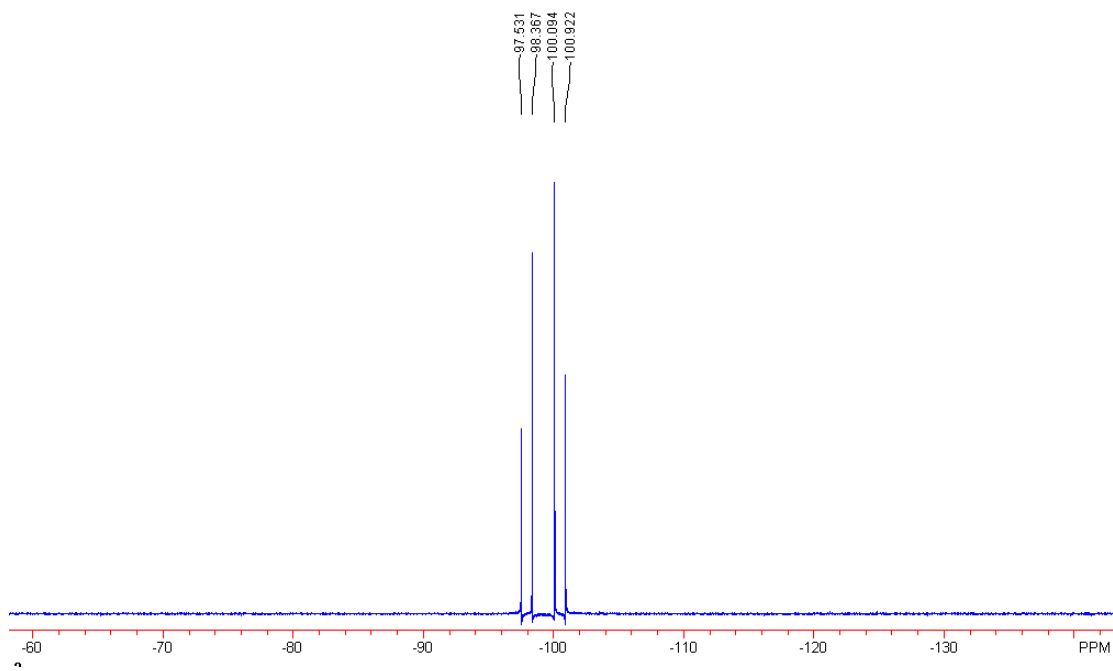

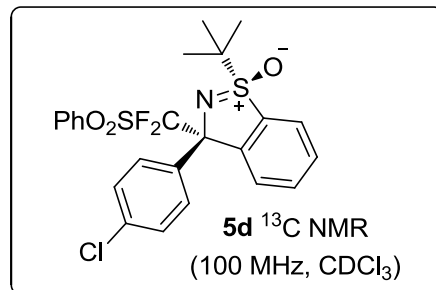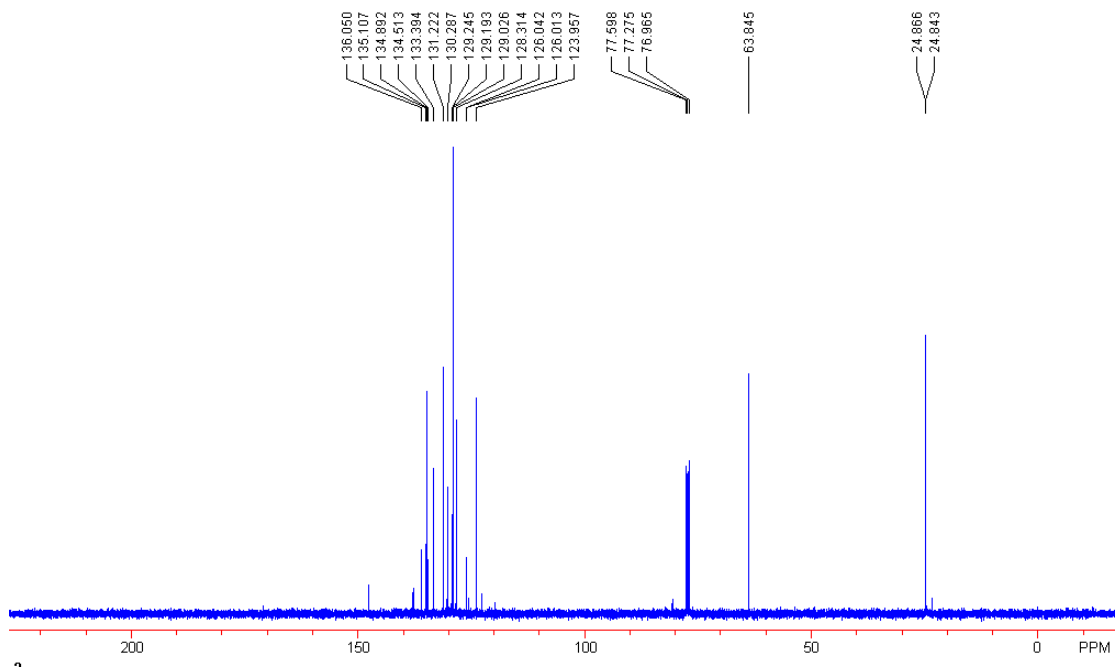

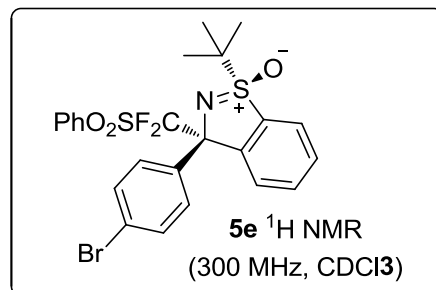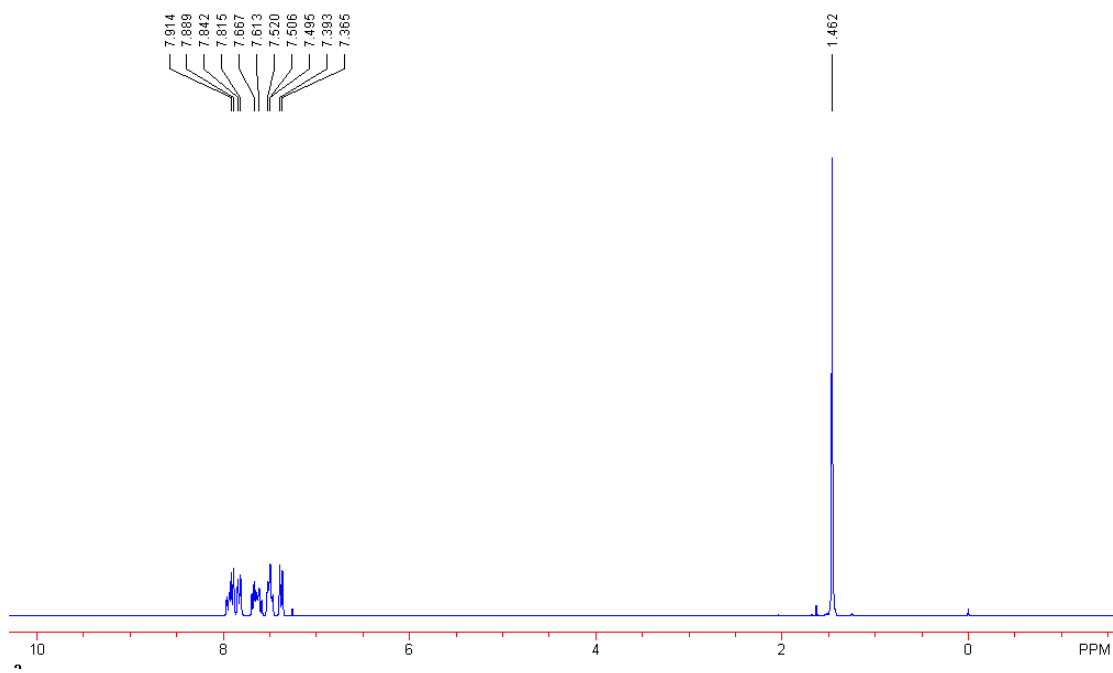

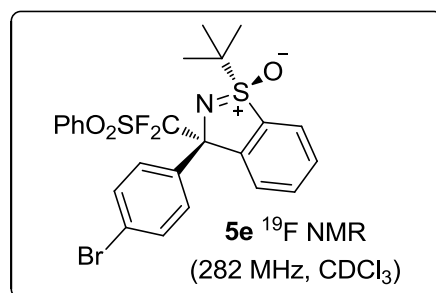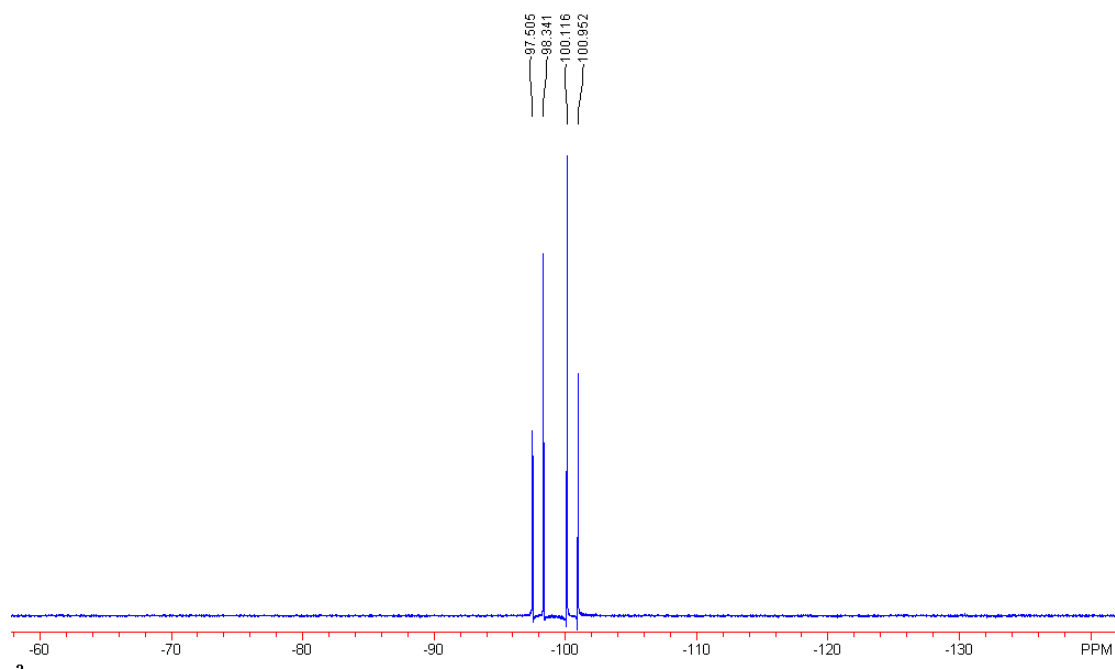

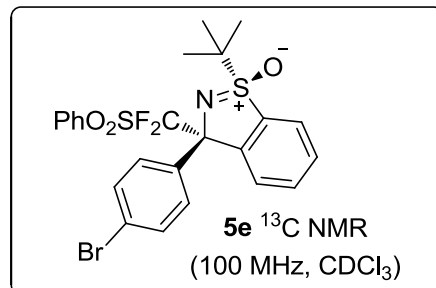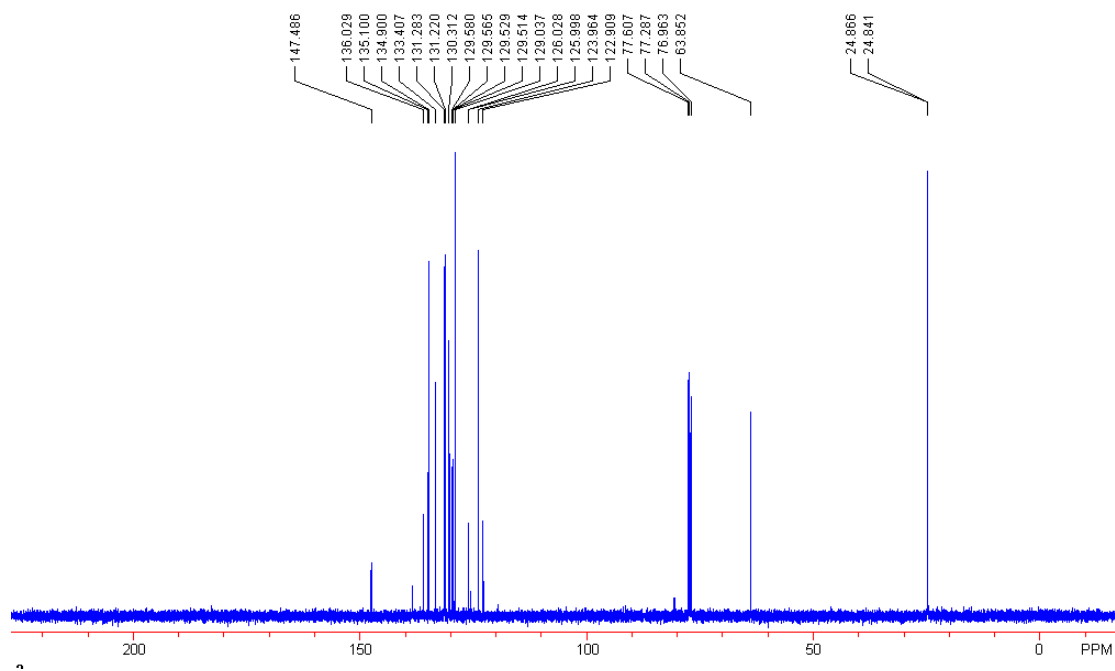



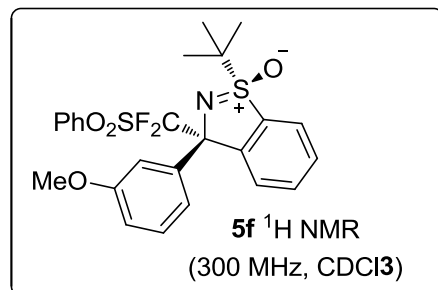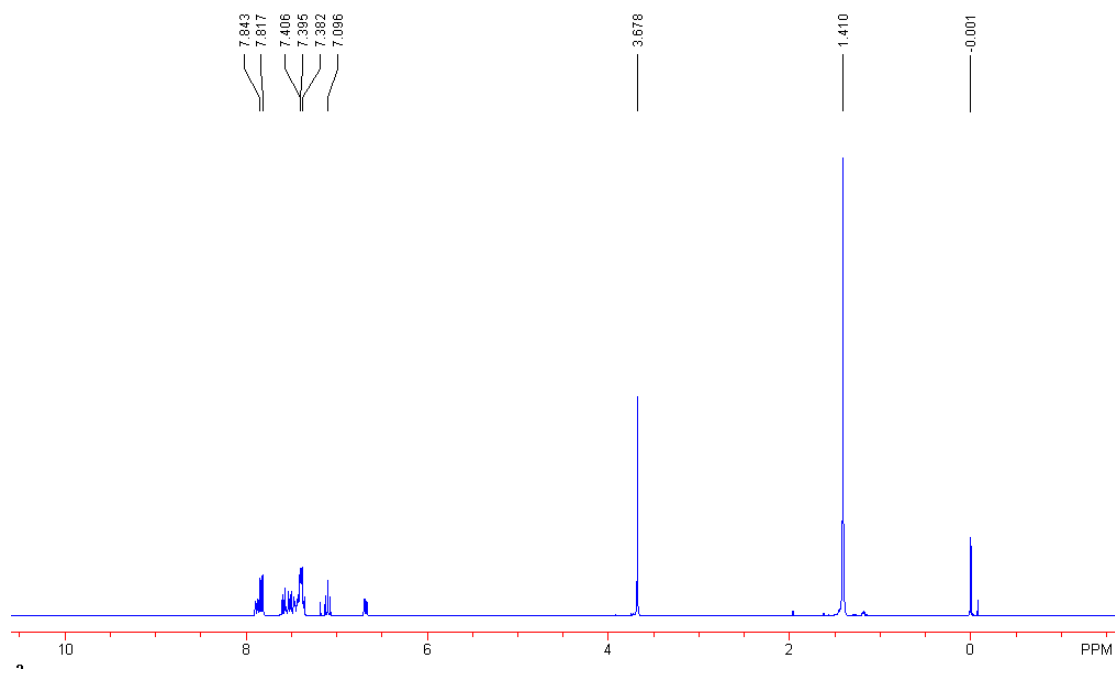

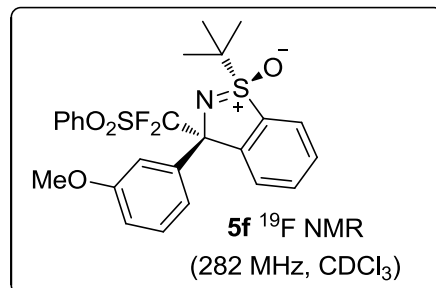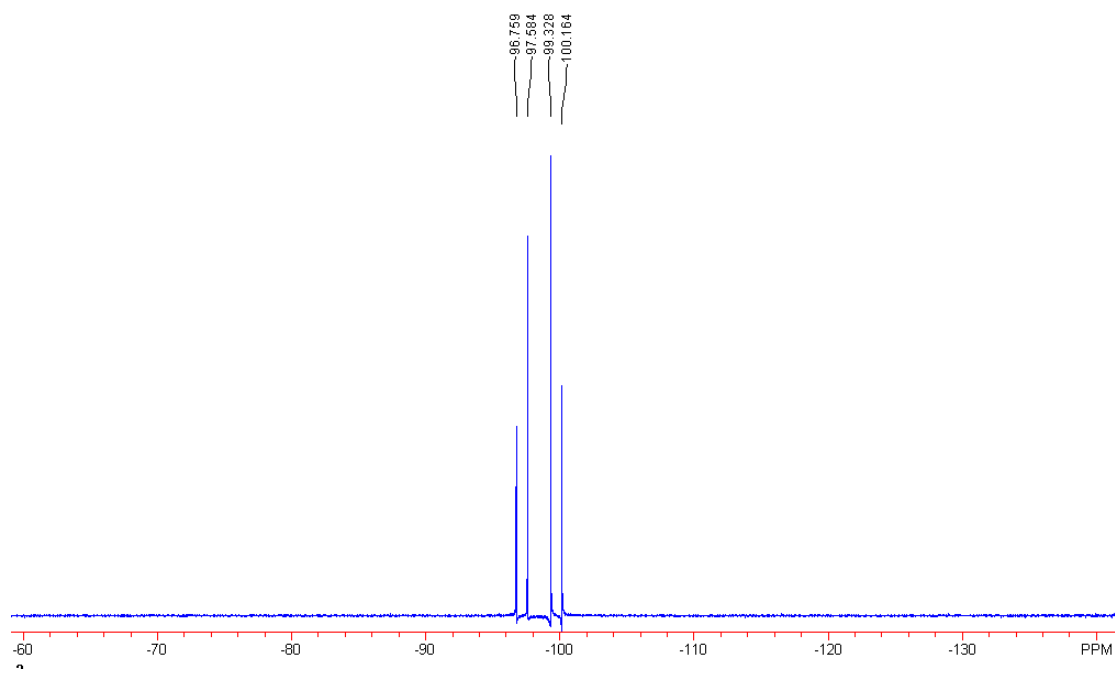

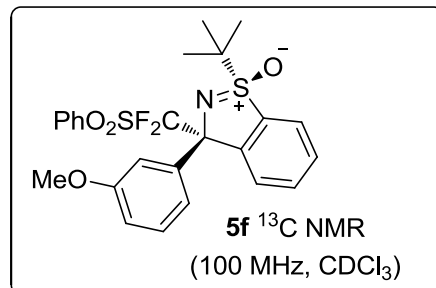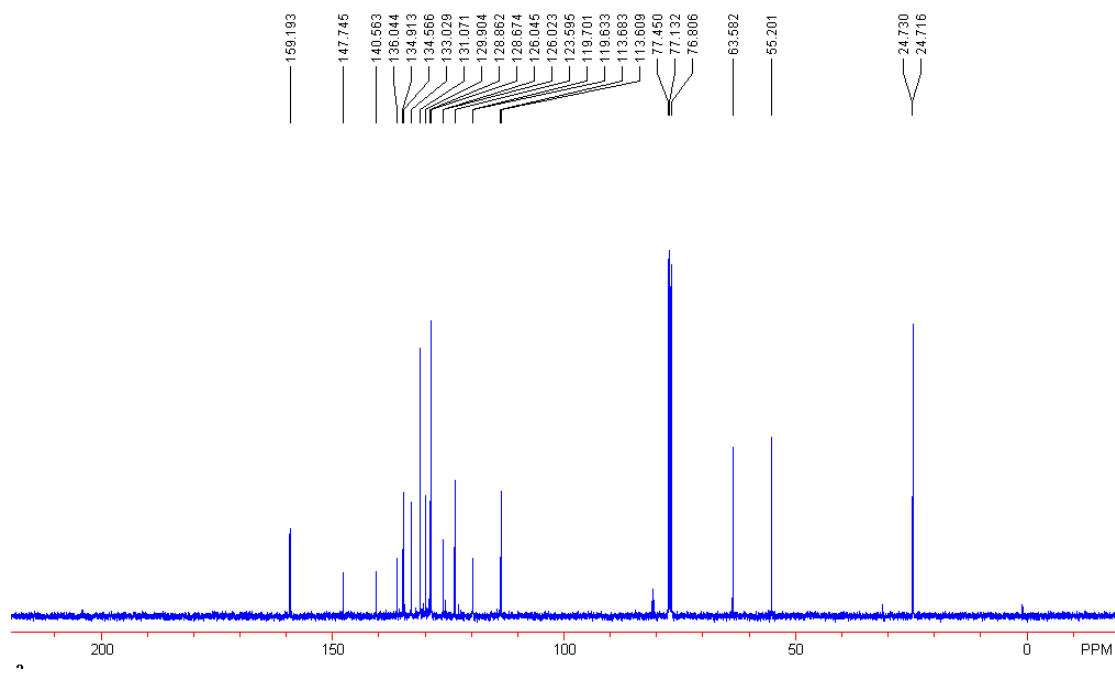

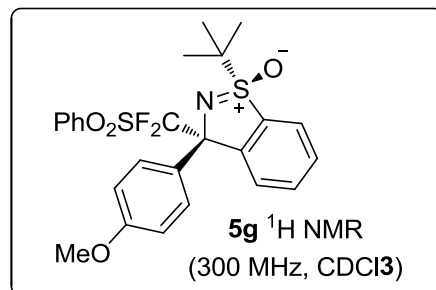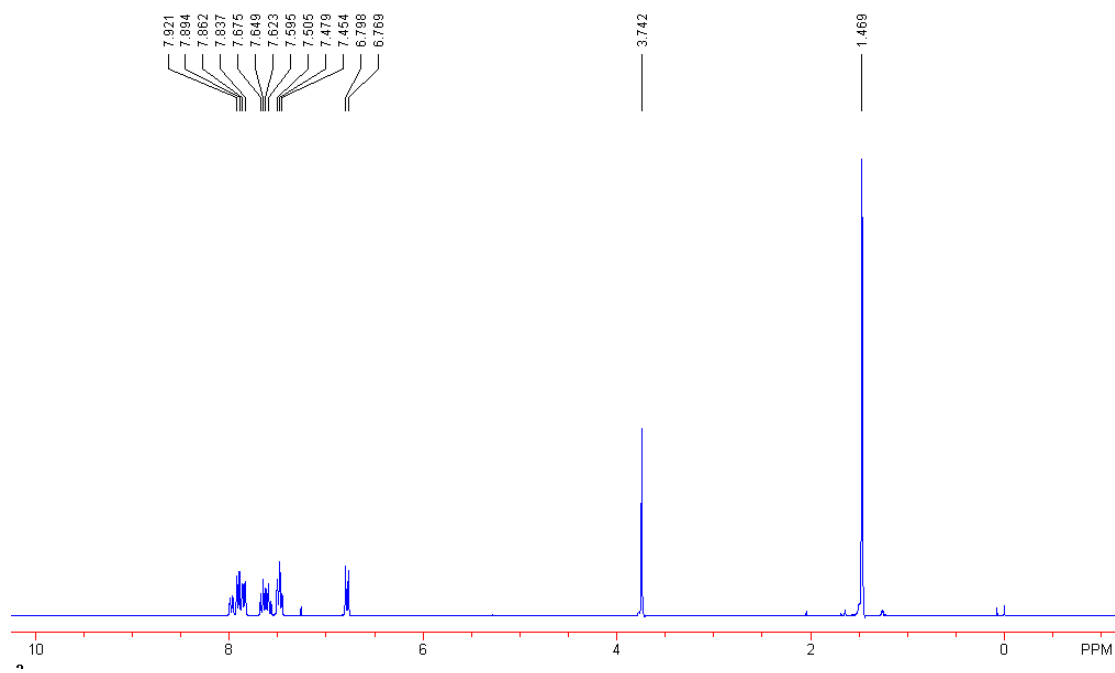

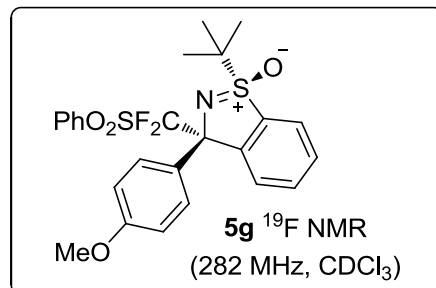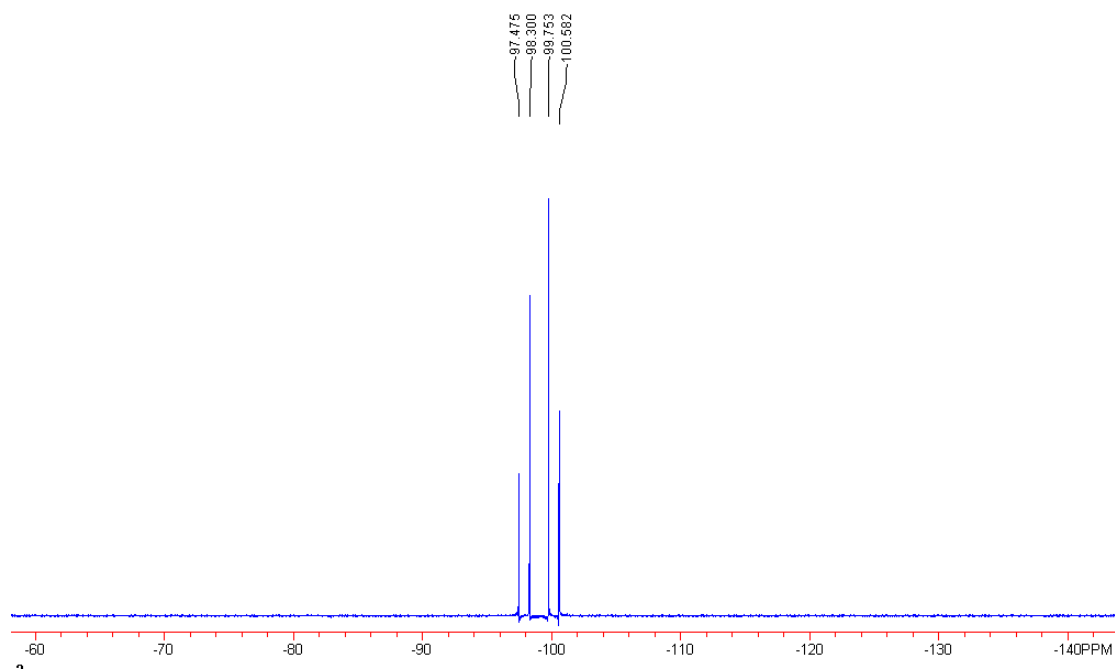

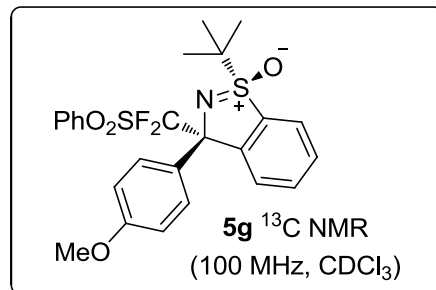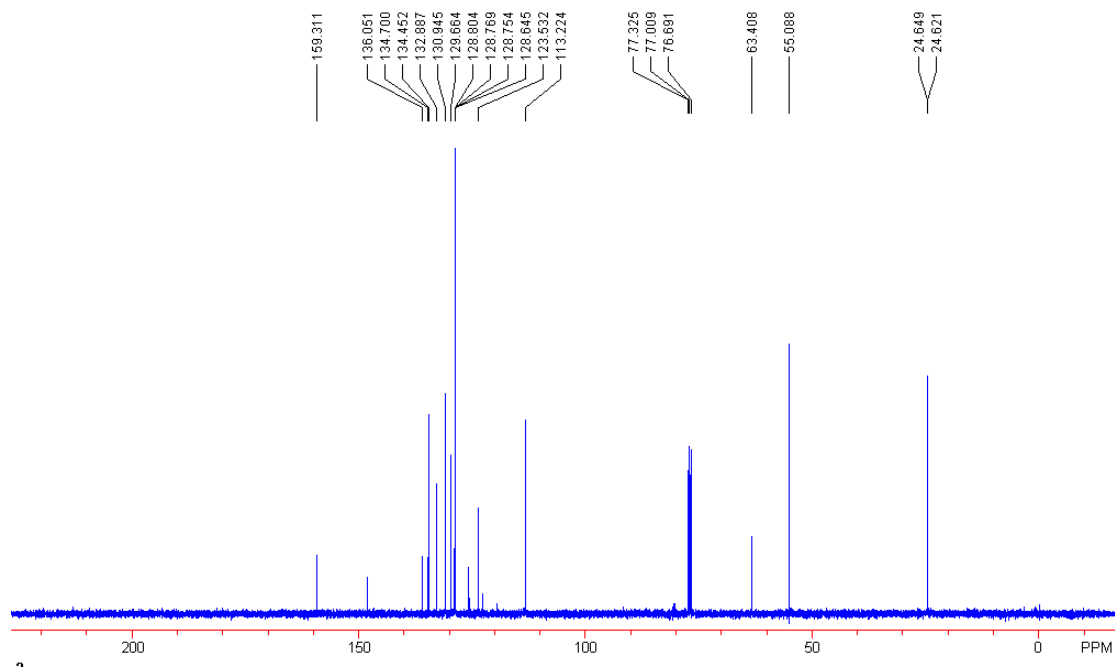

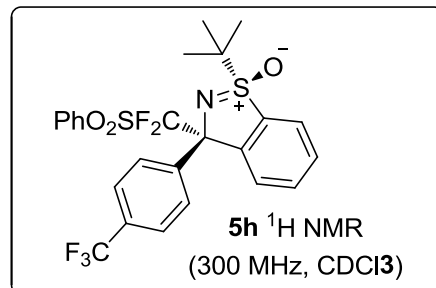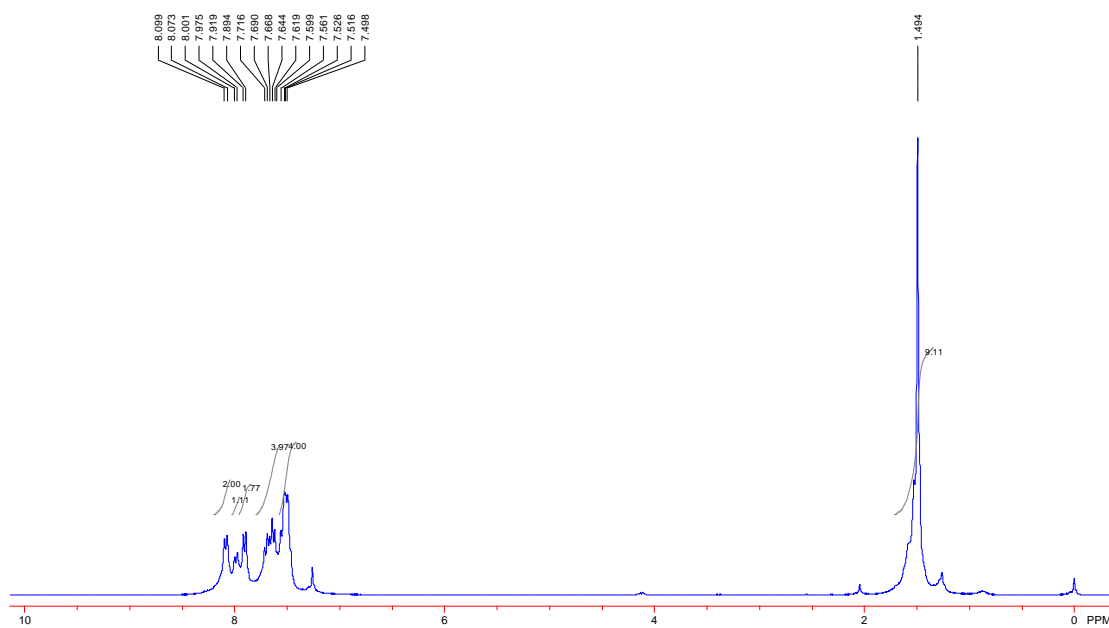

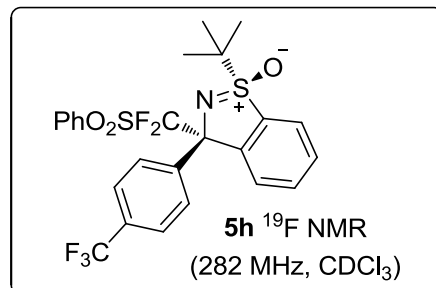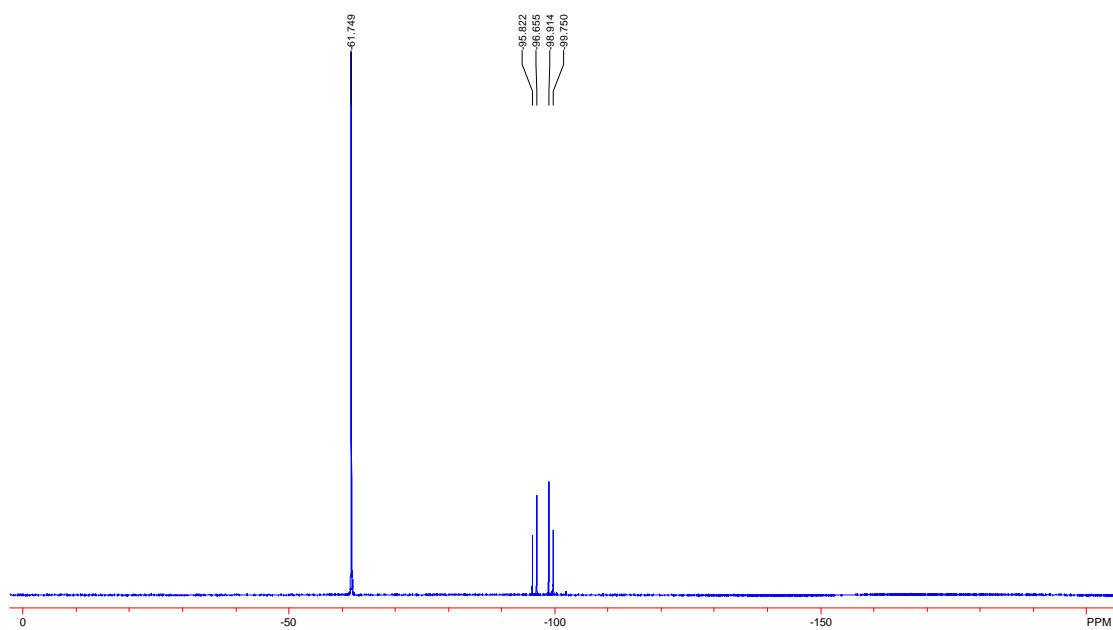



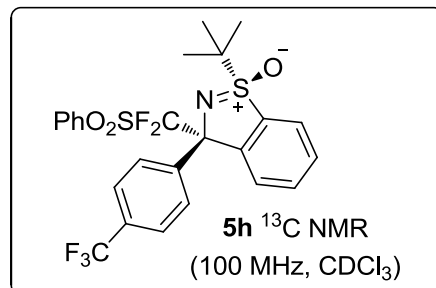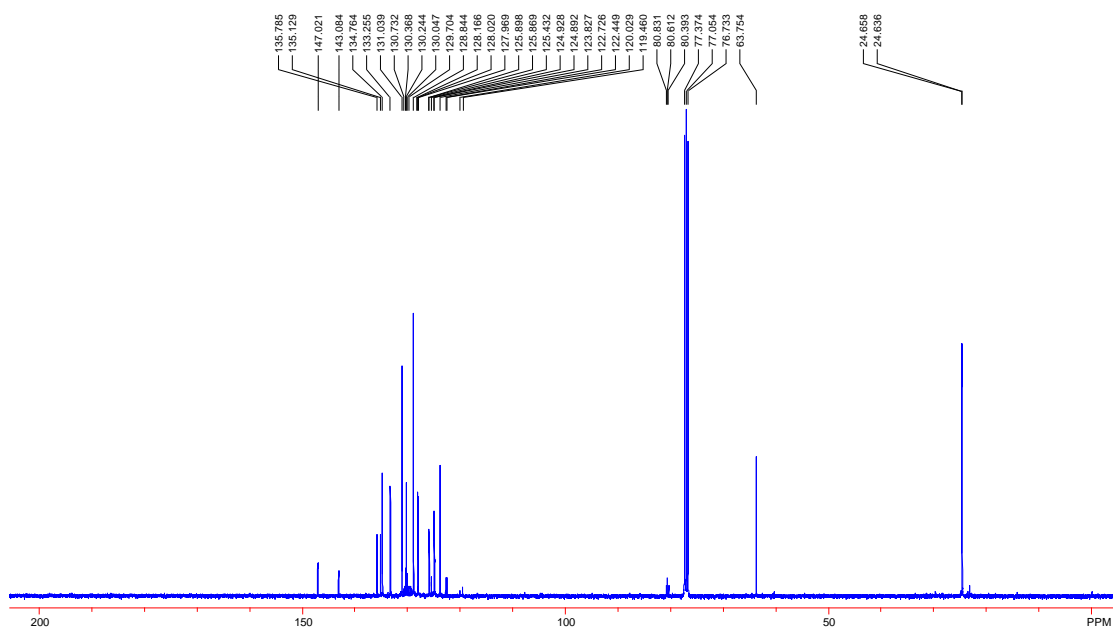

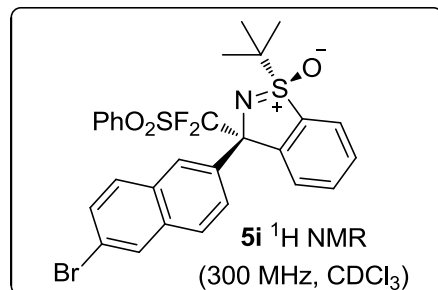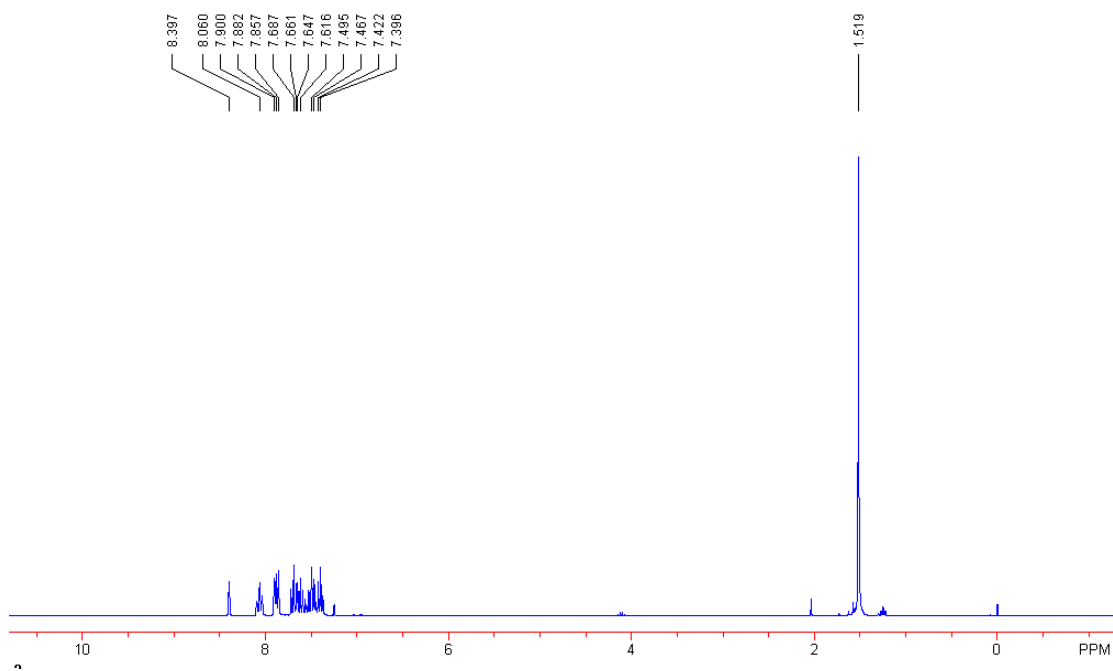

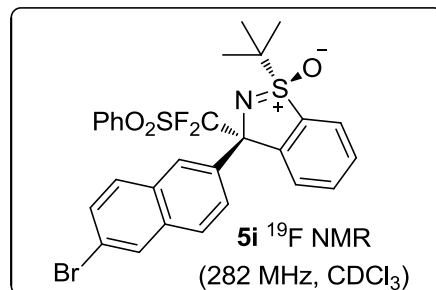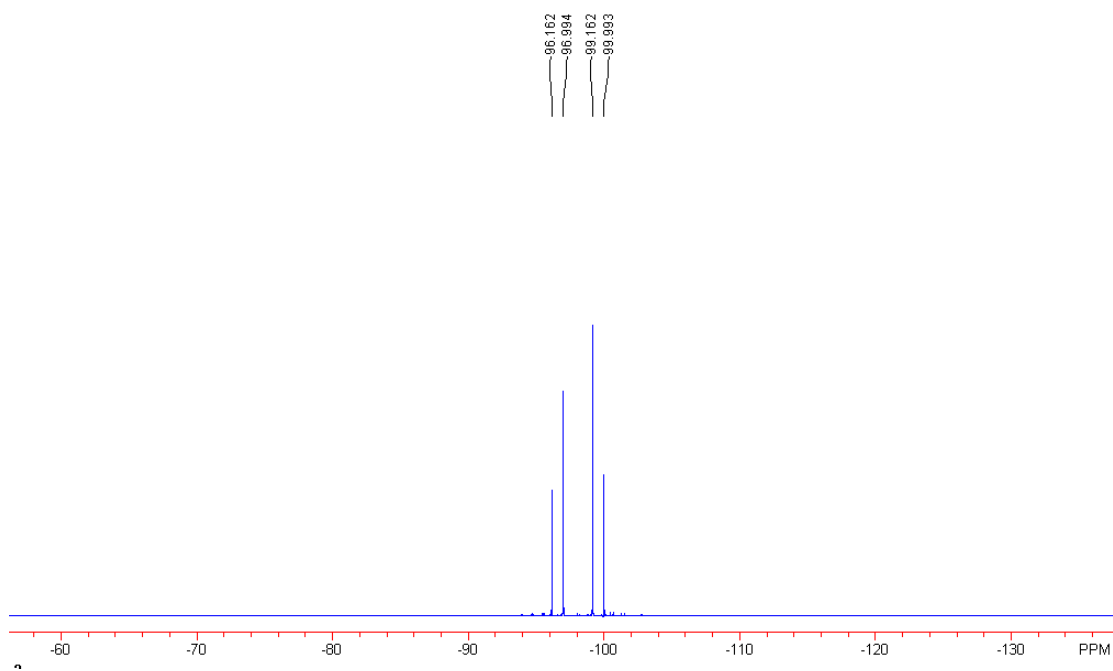

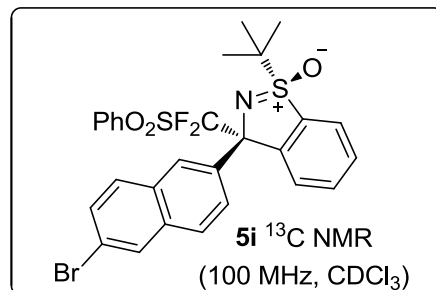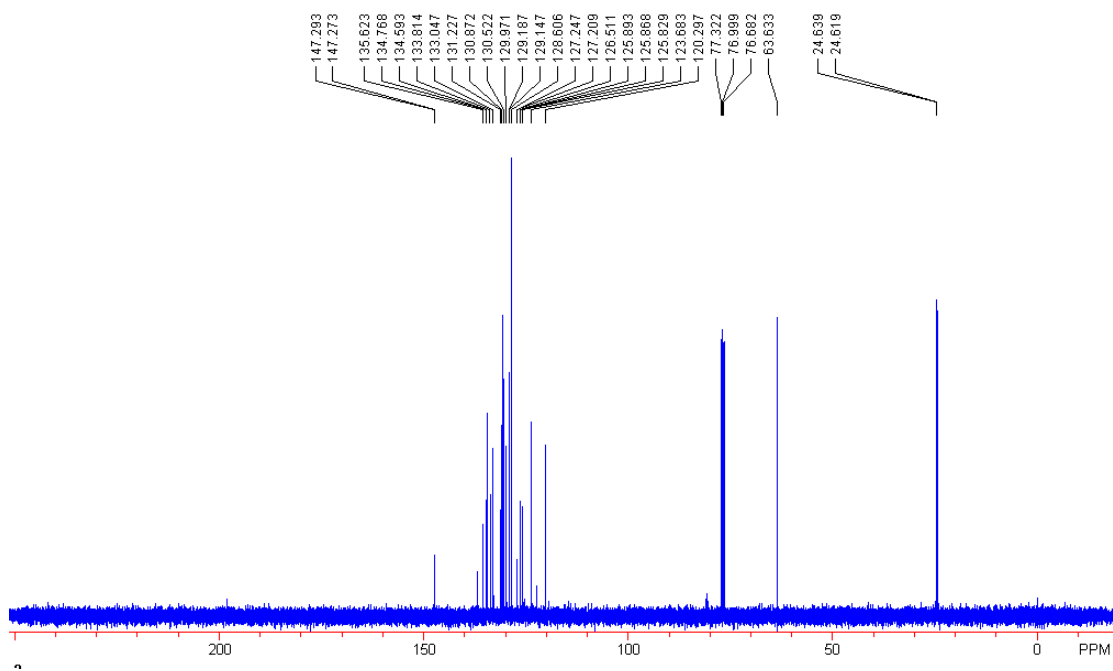

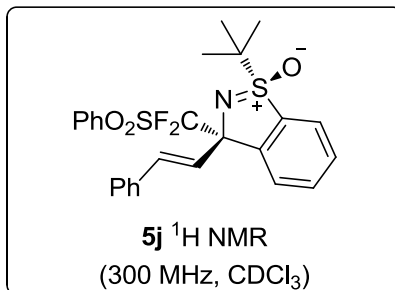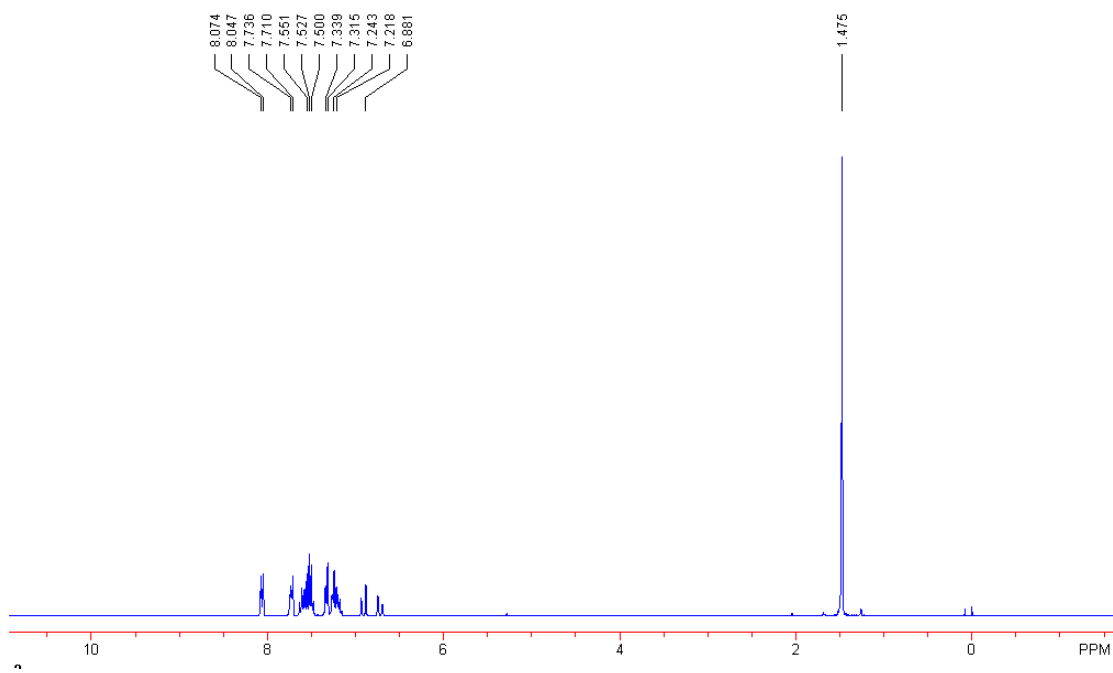

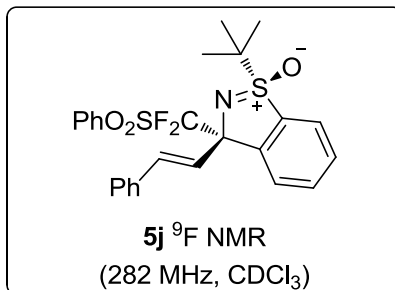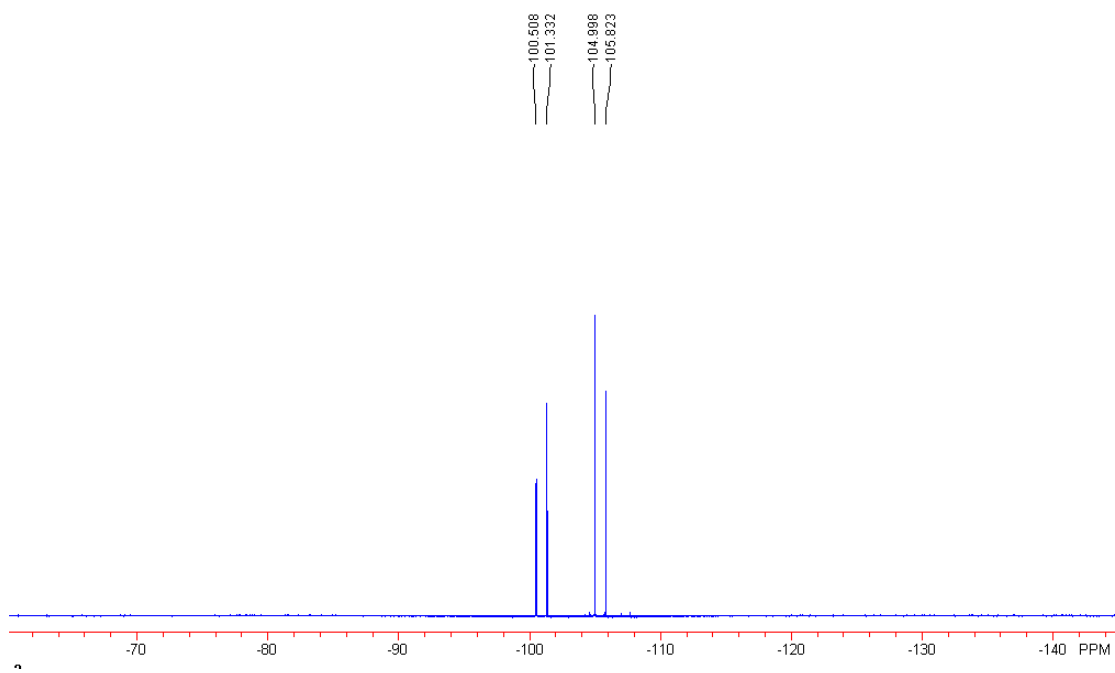

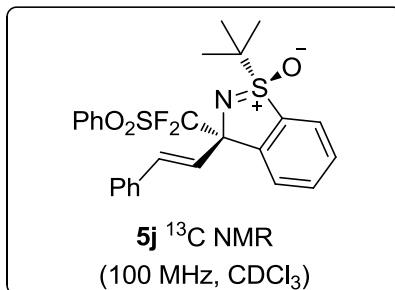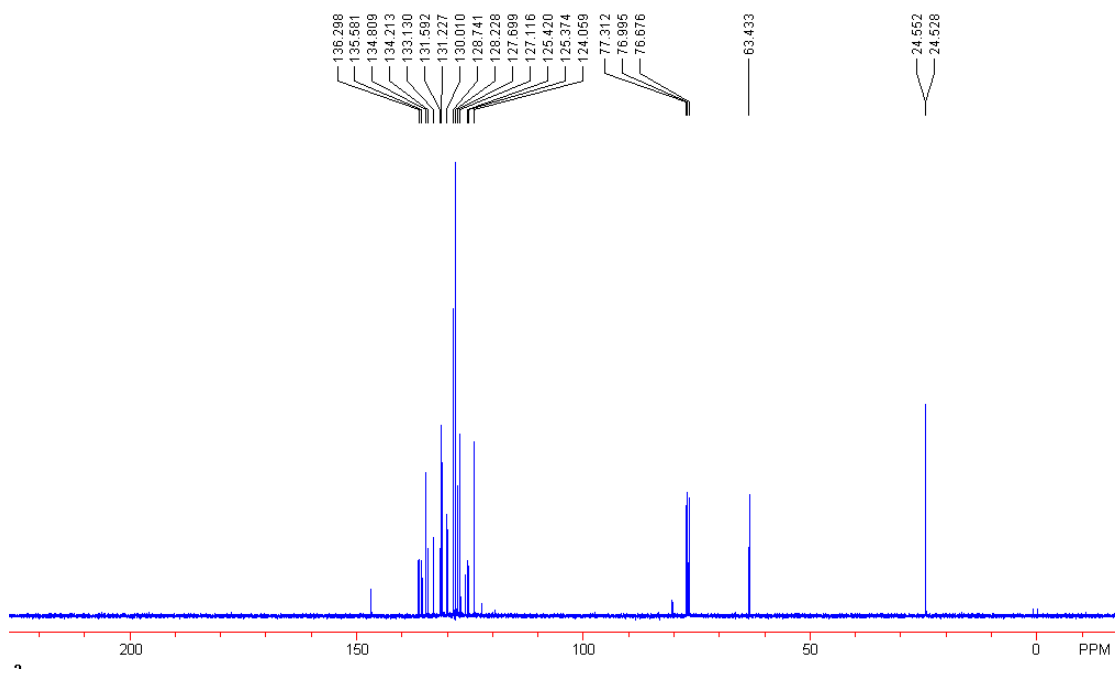

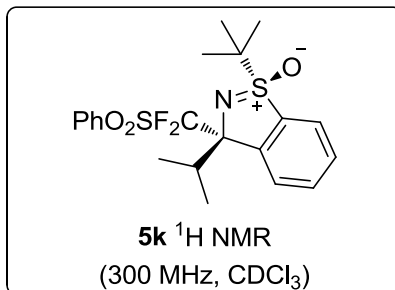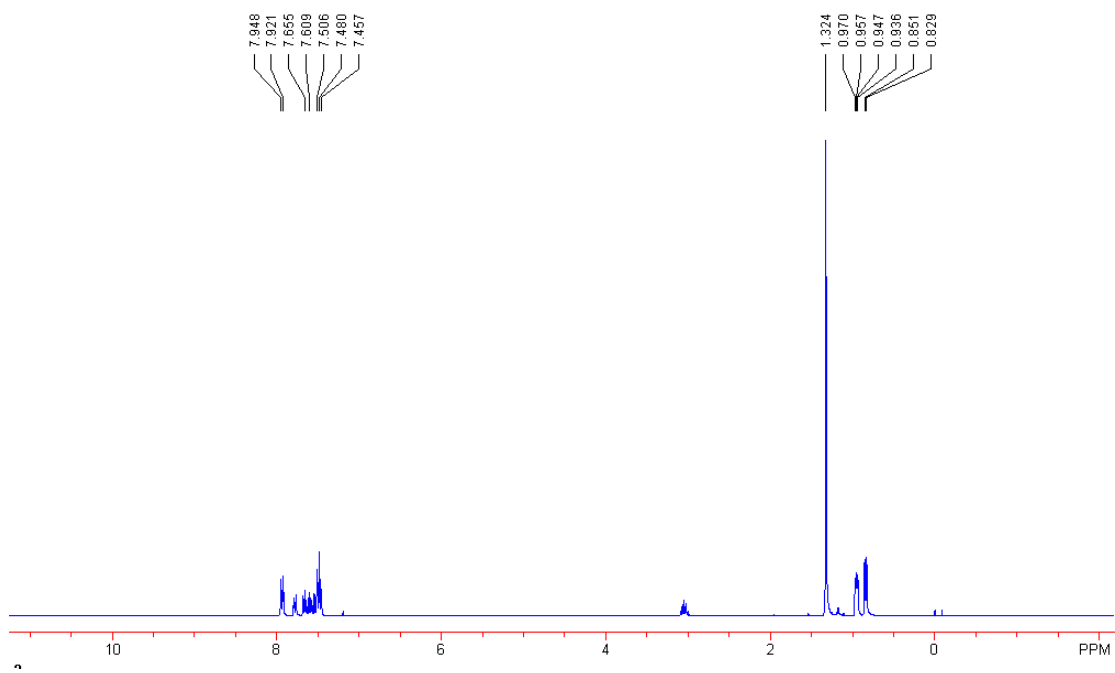



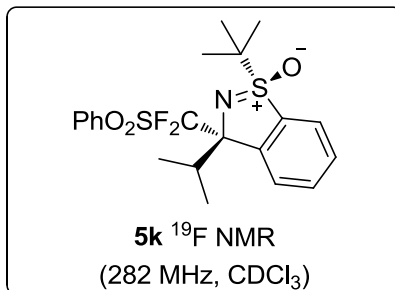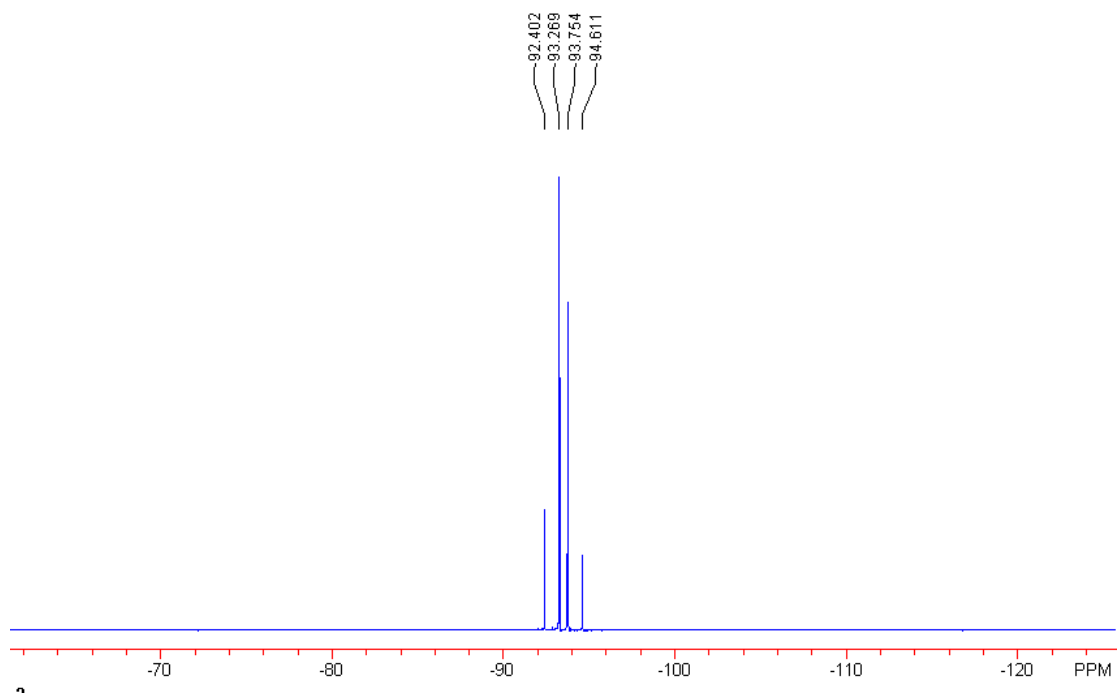

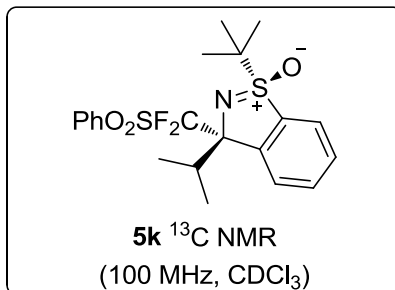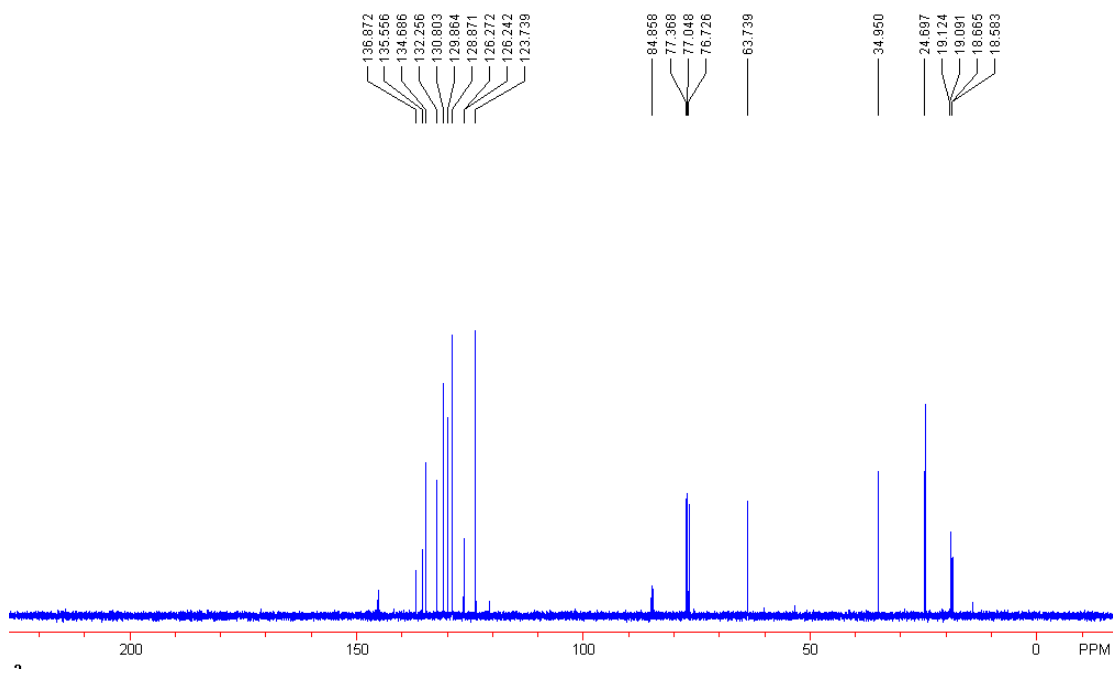

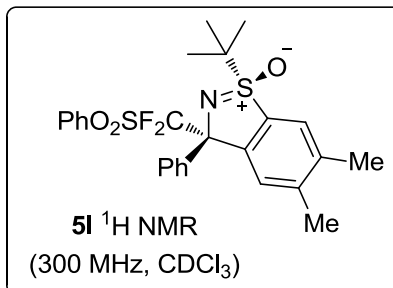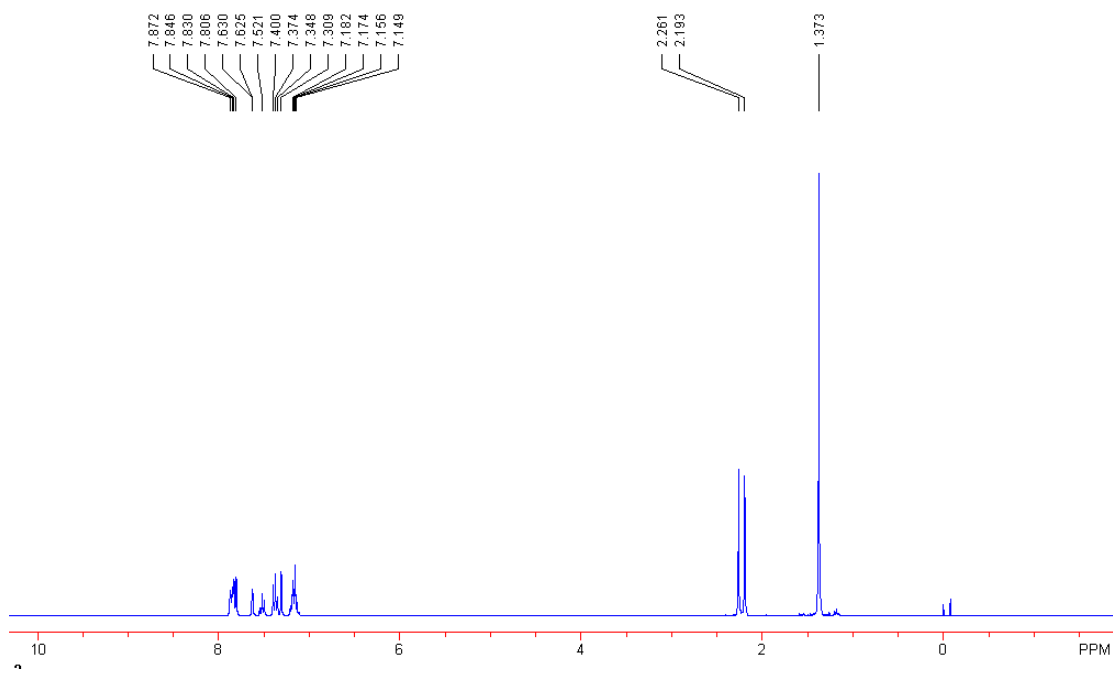

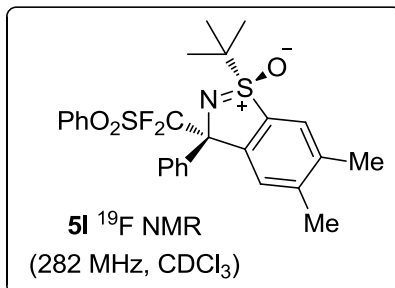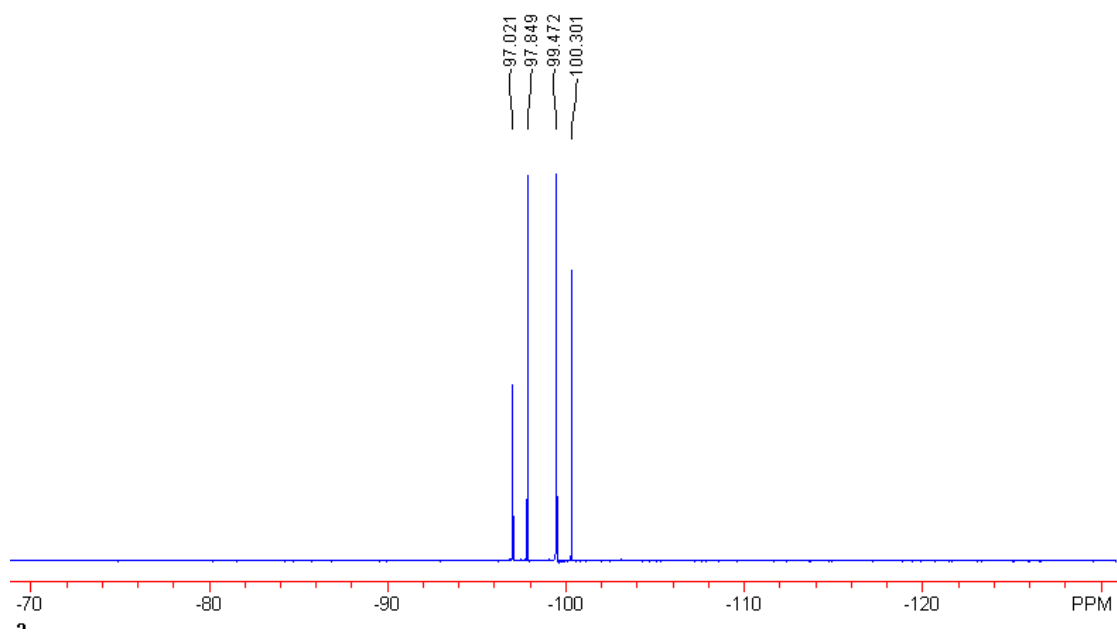

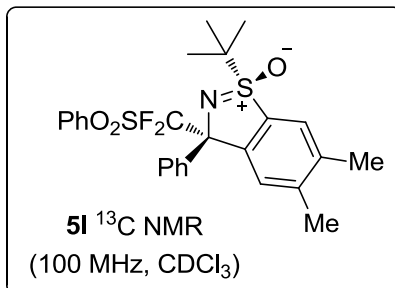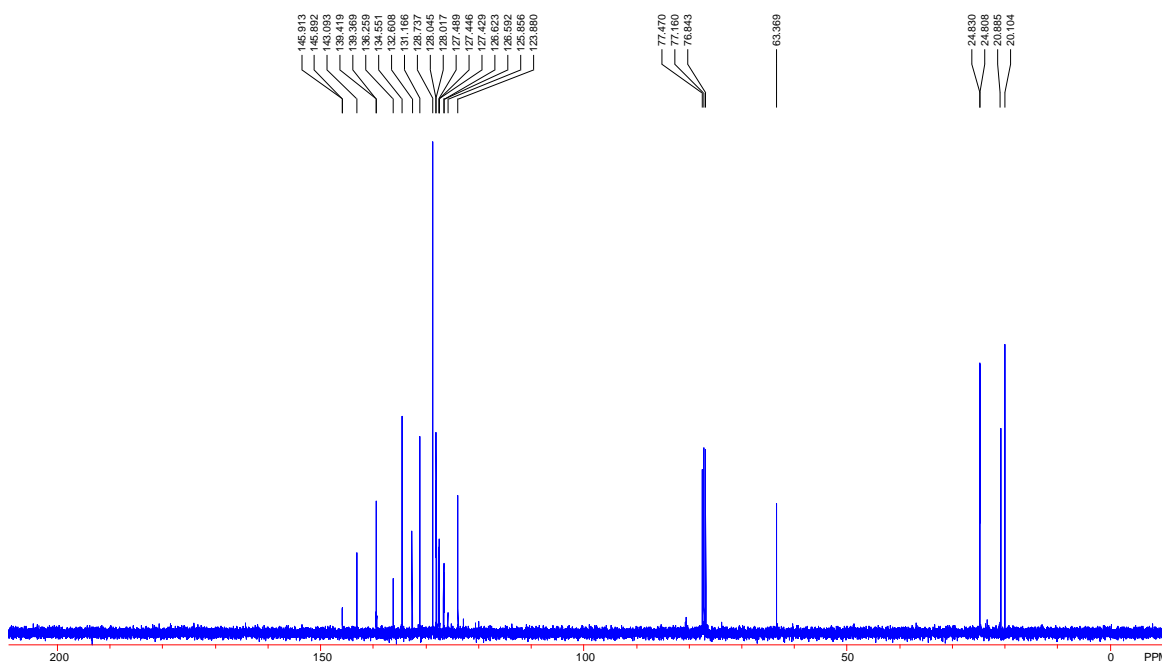

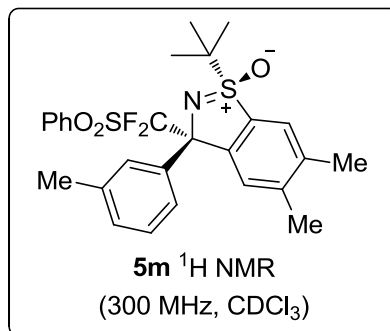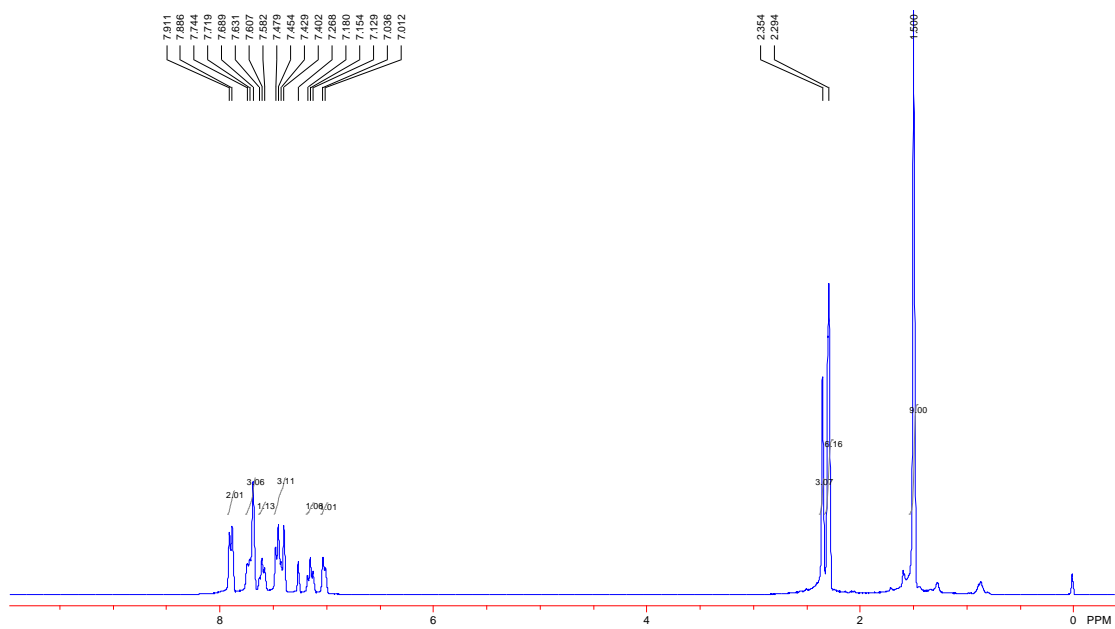

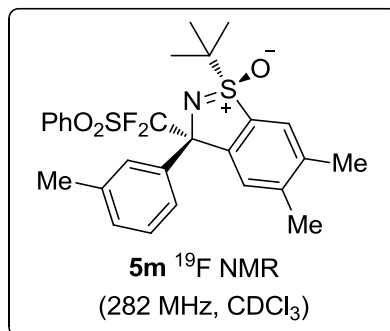

98.508  
98.507  
98.502  
98.389

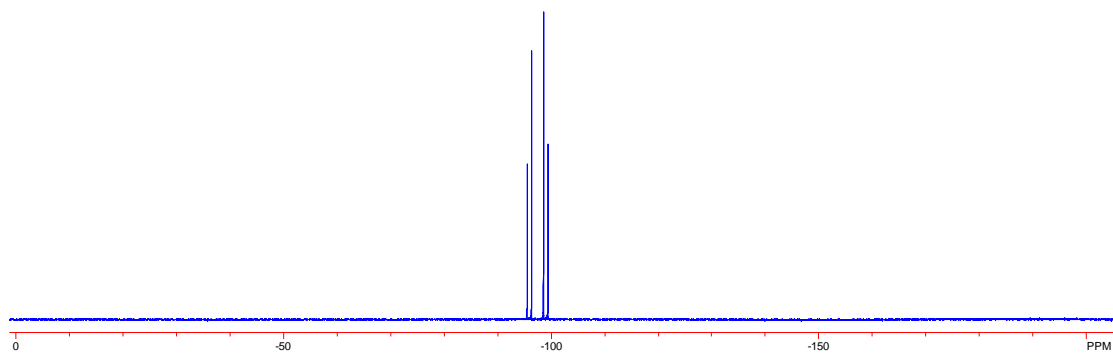

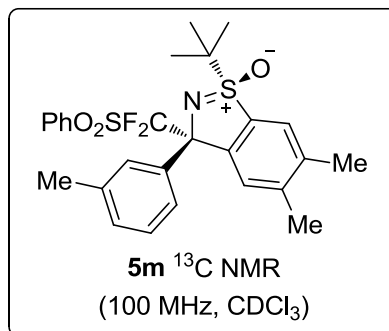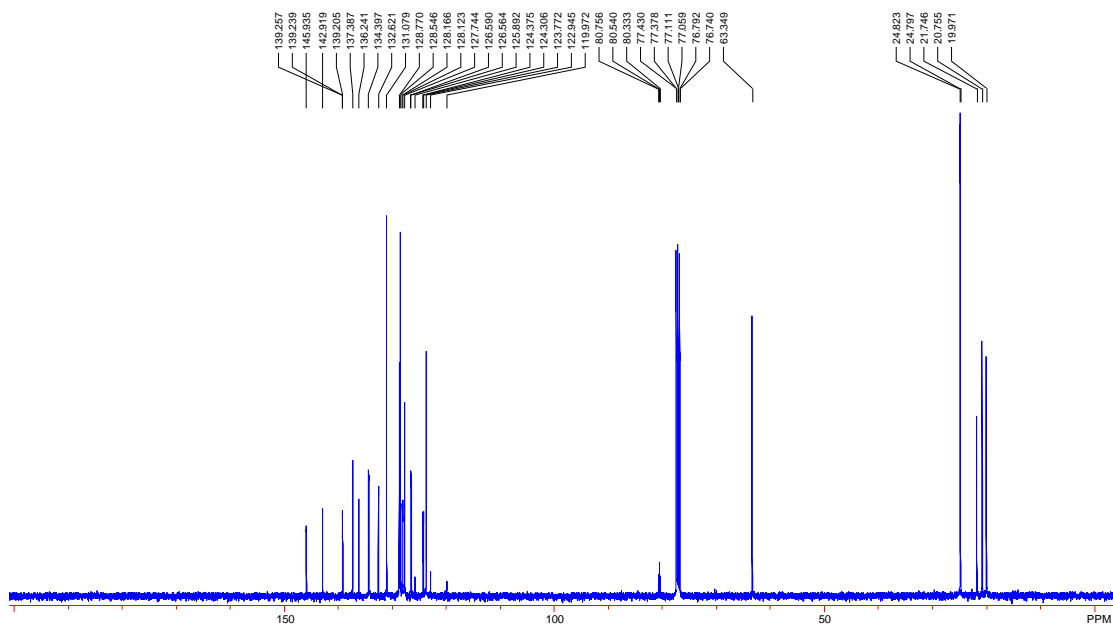



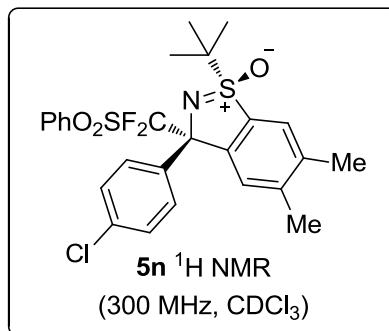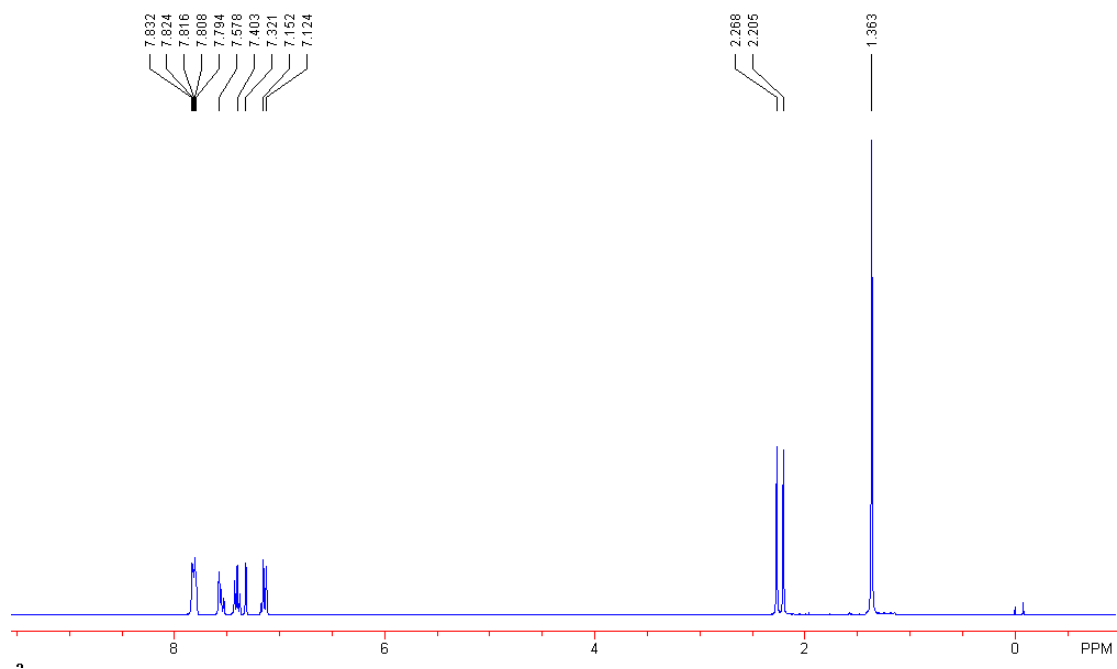

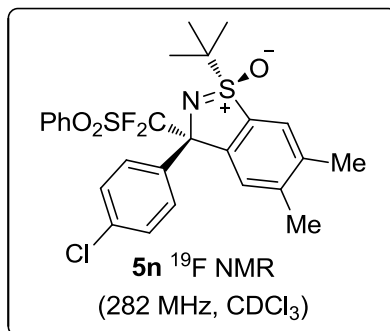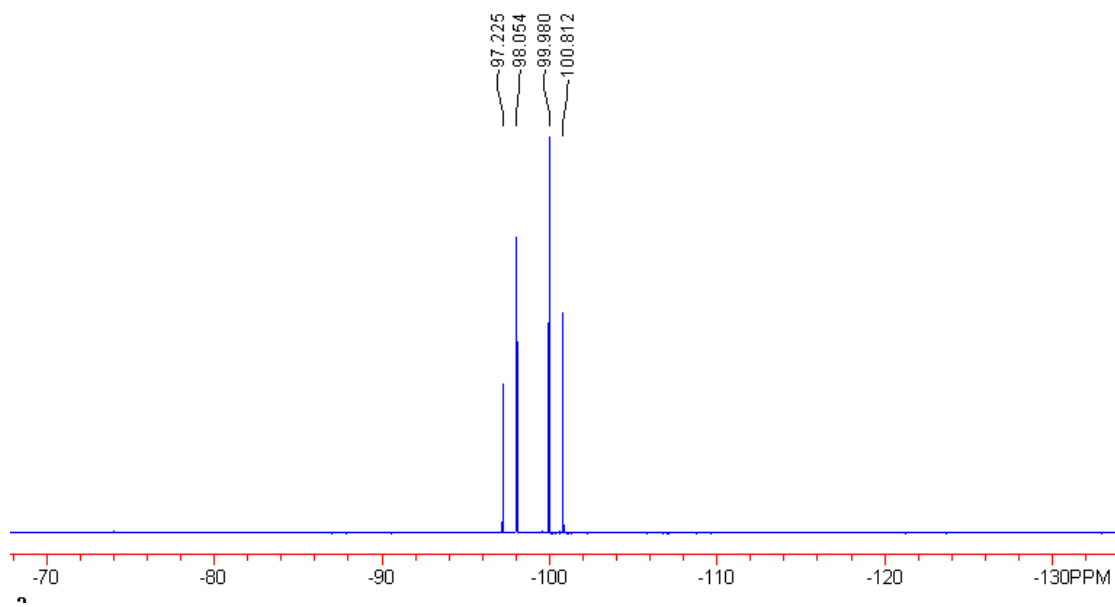

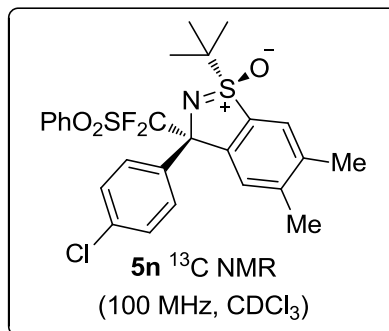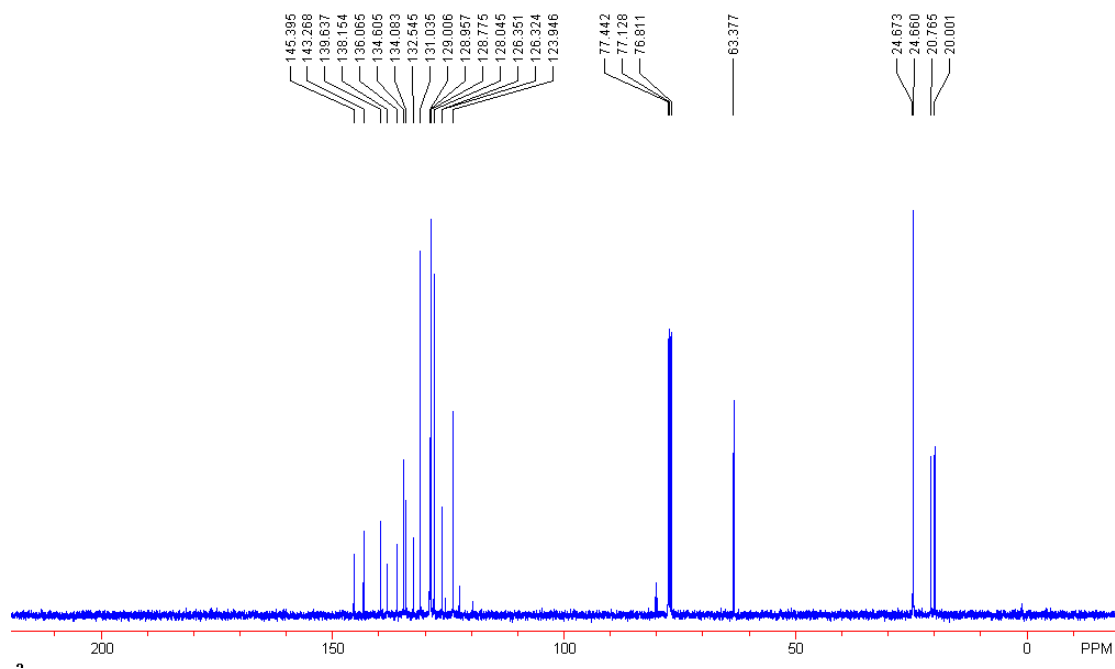

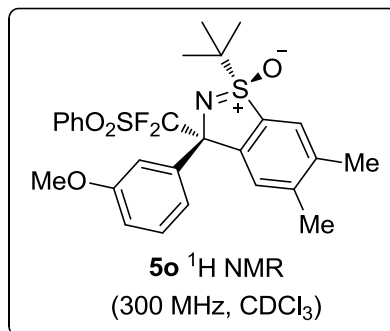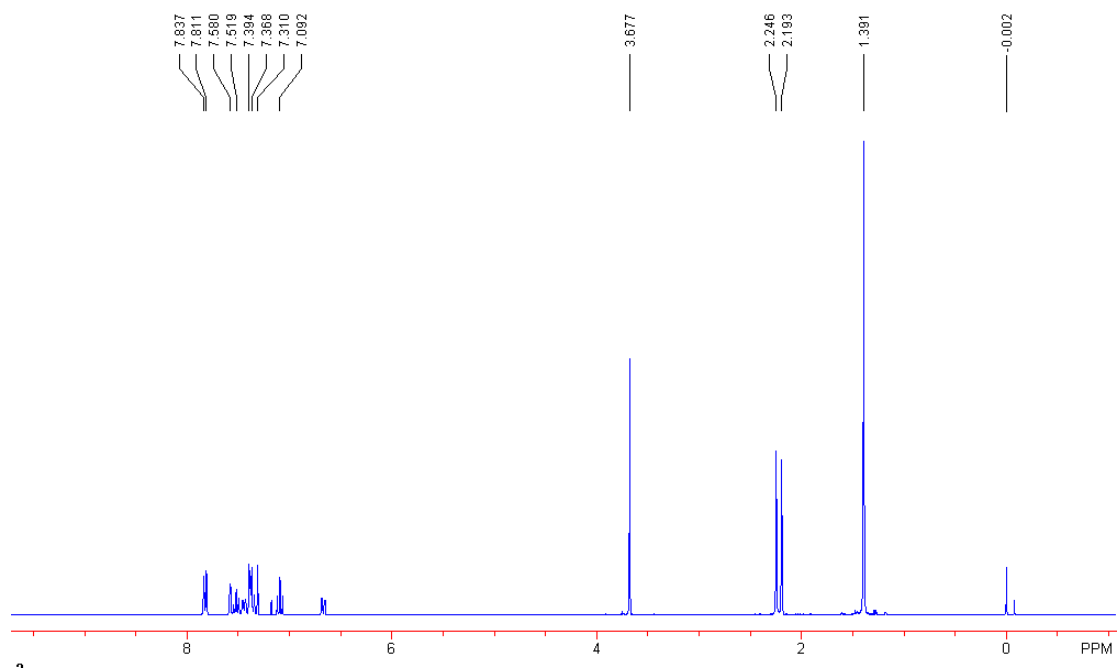

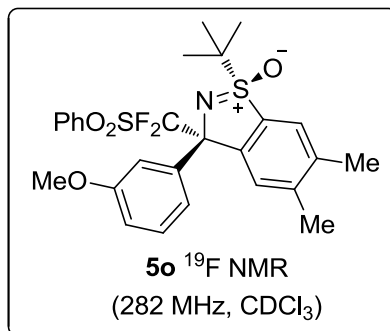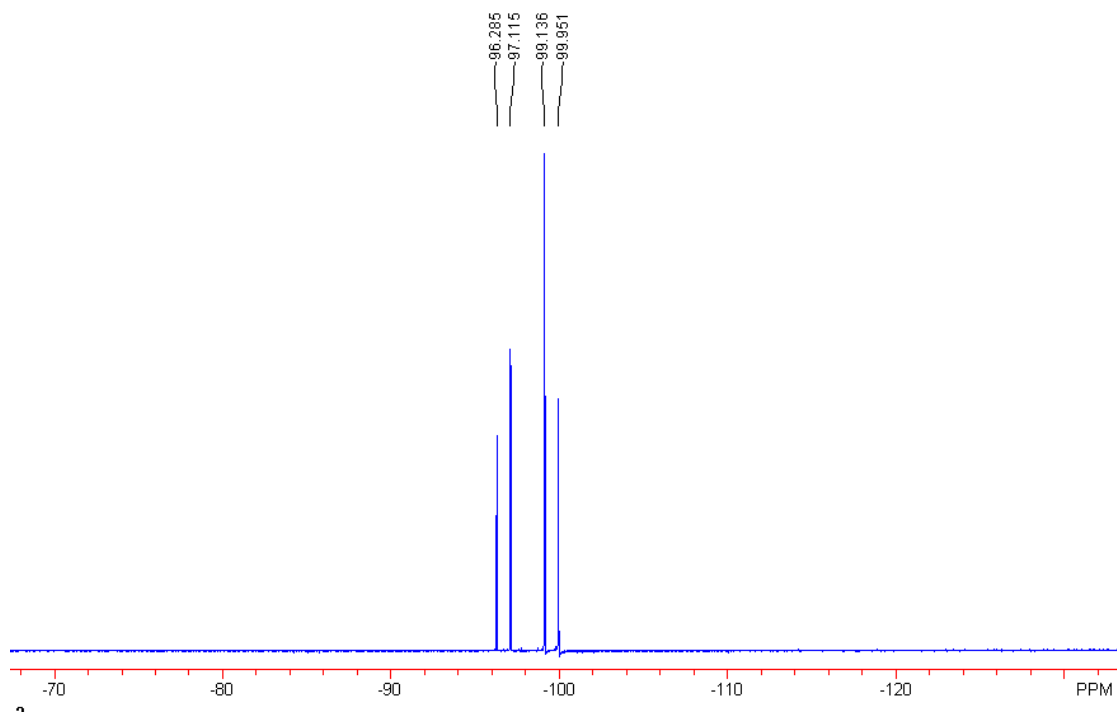

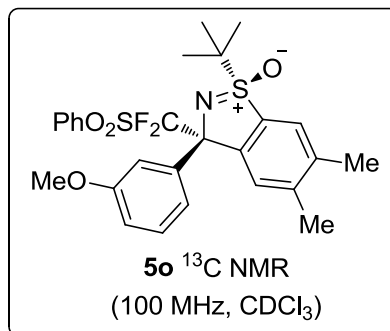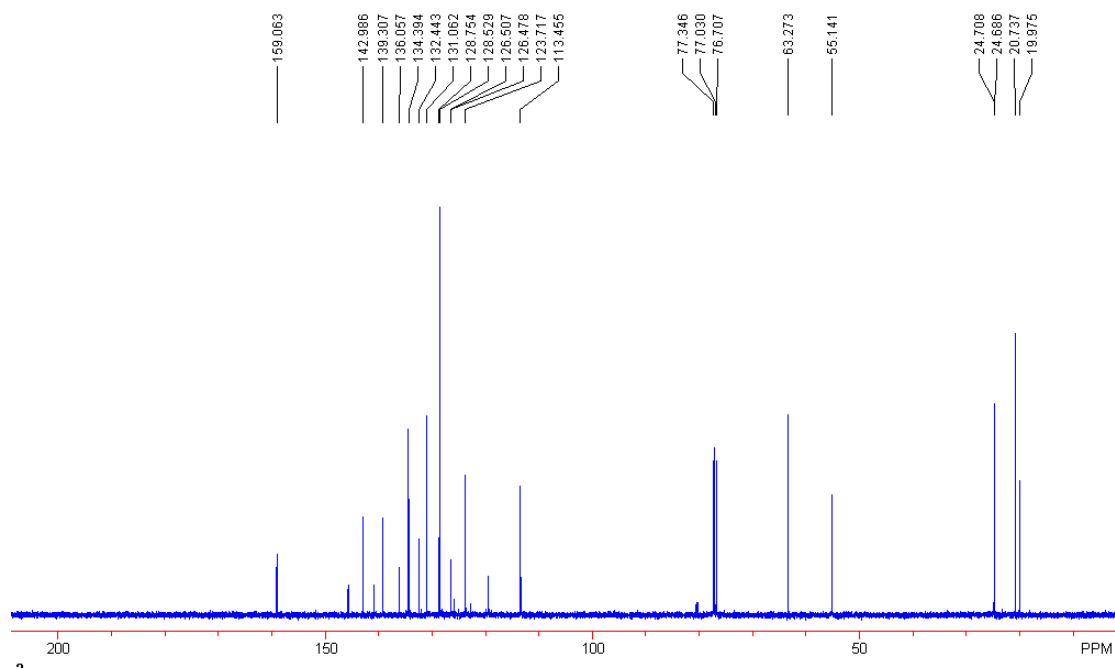

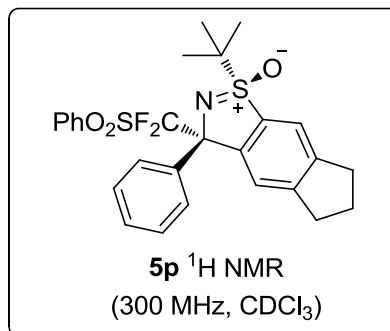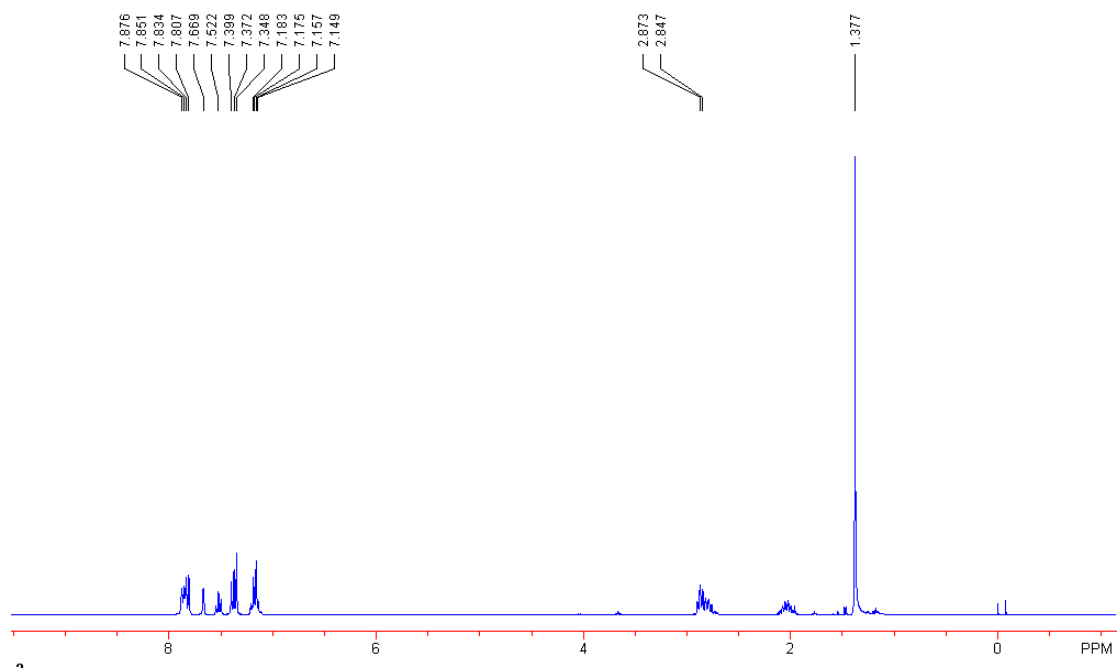

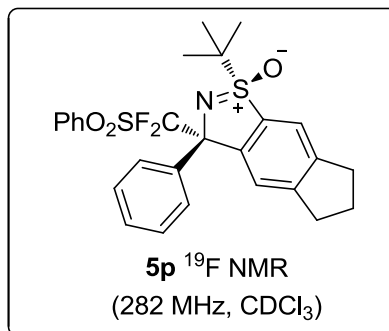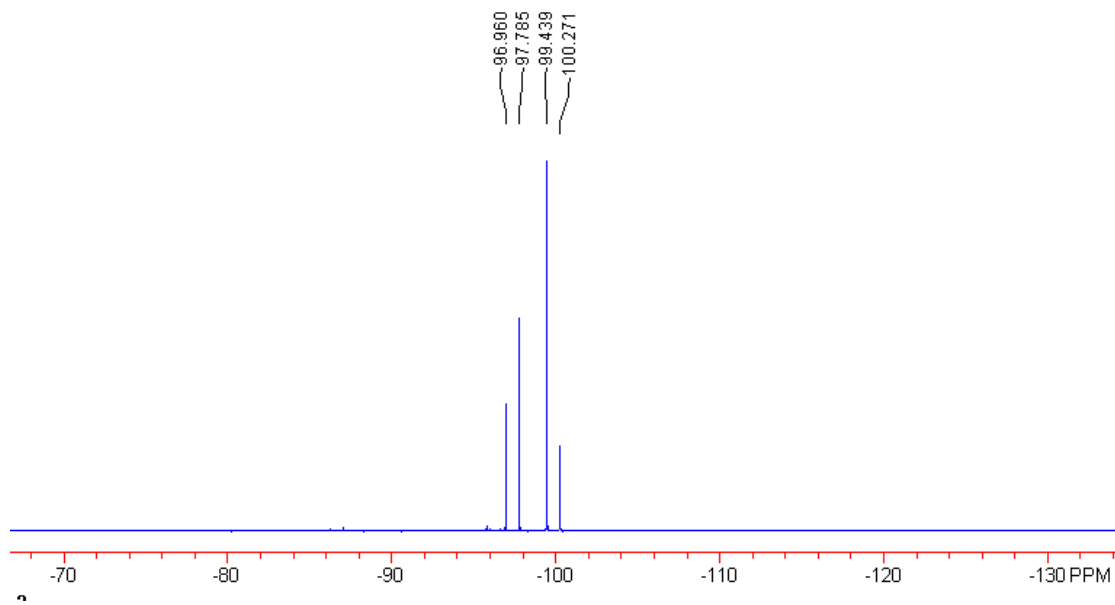



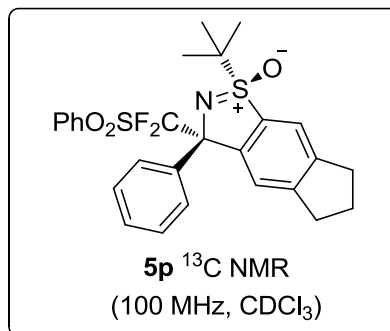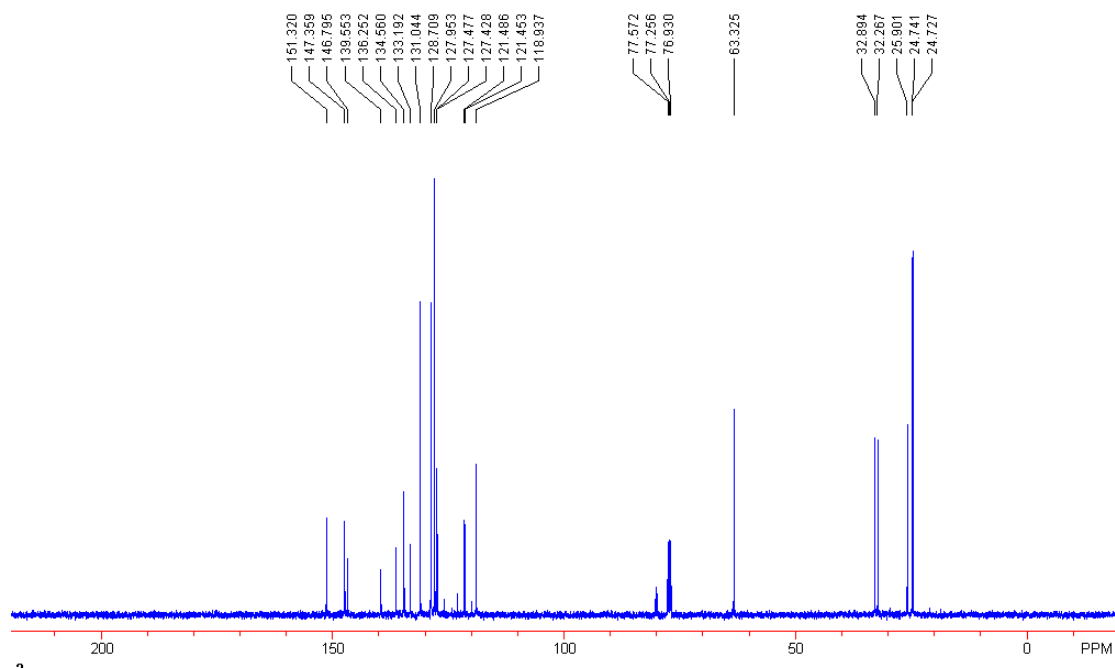

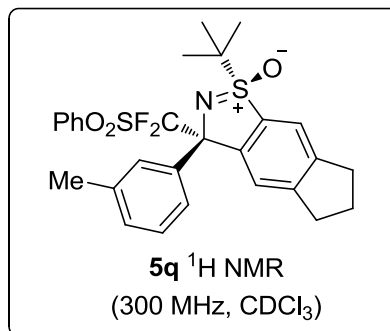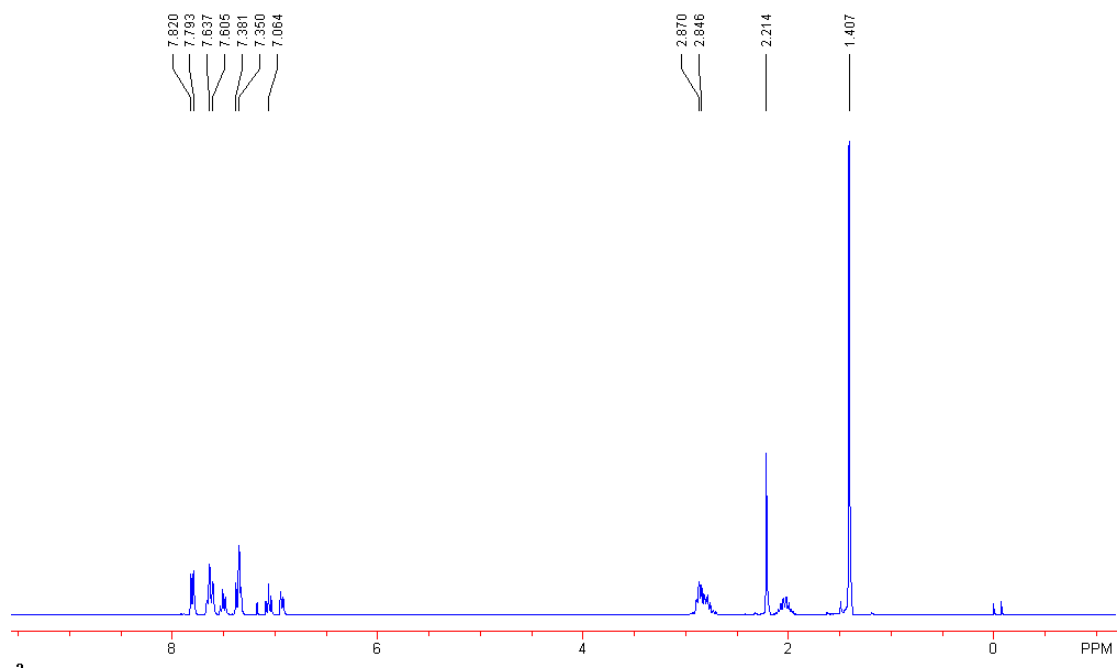

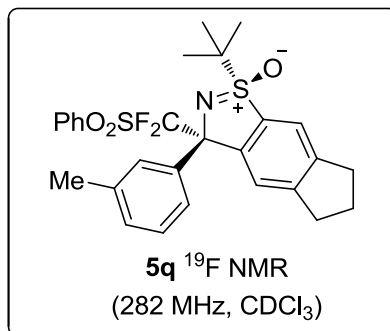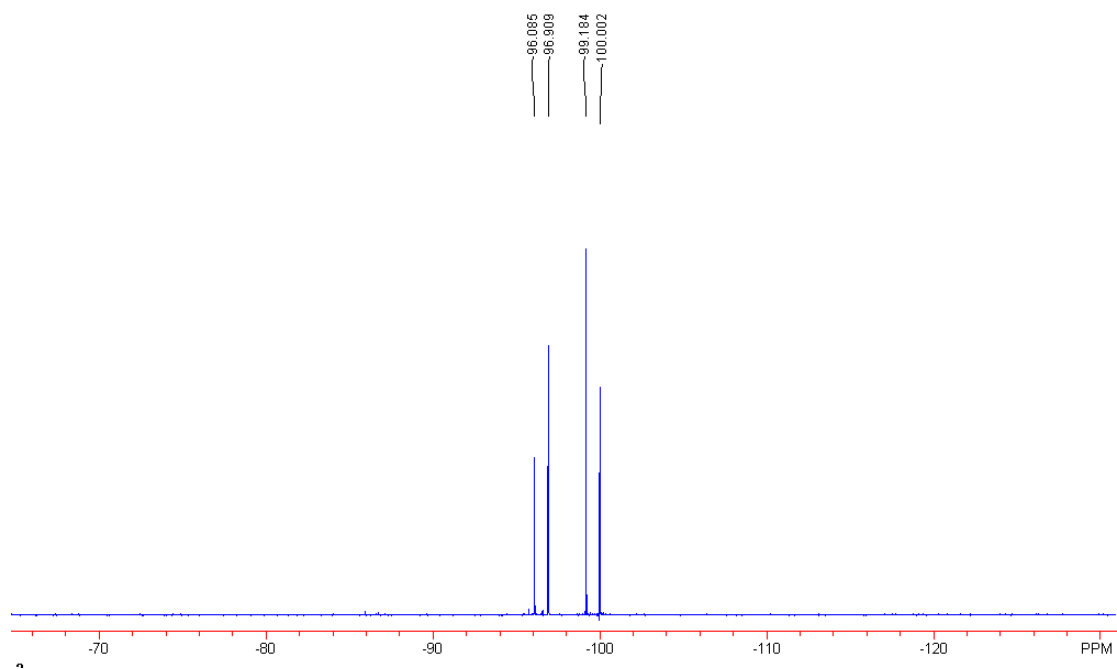

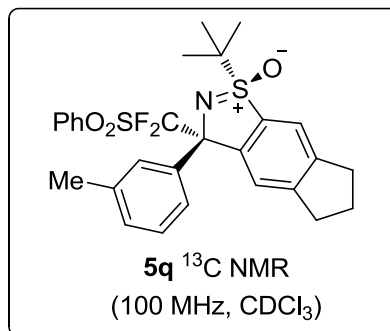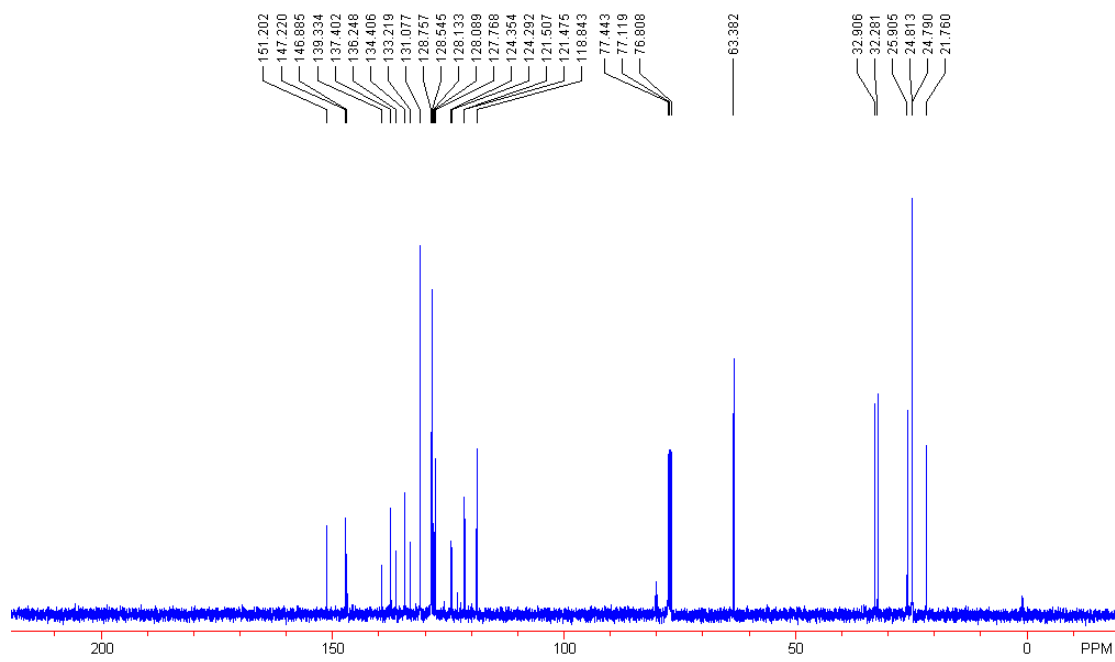

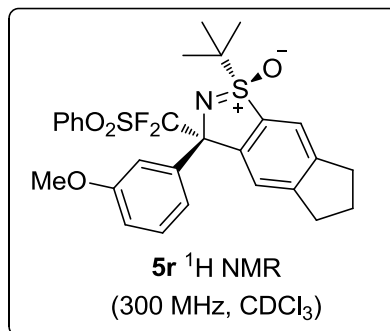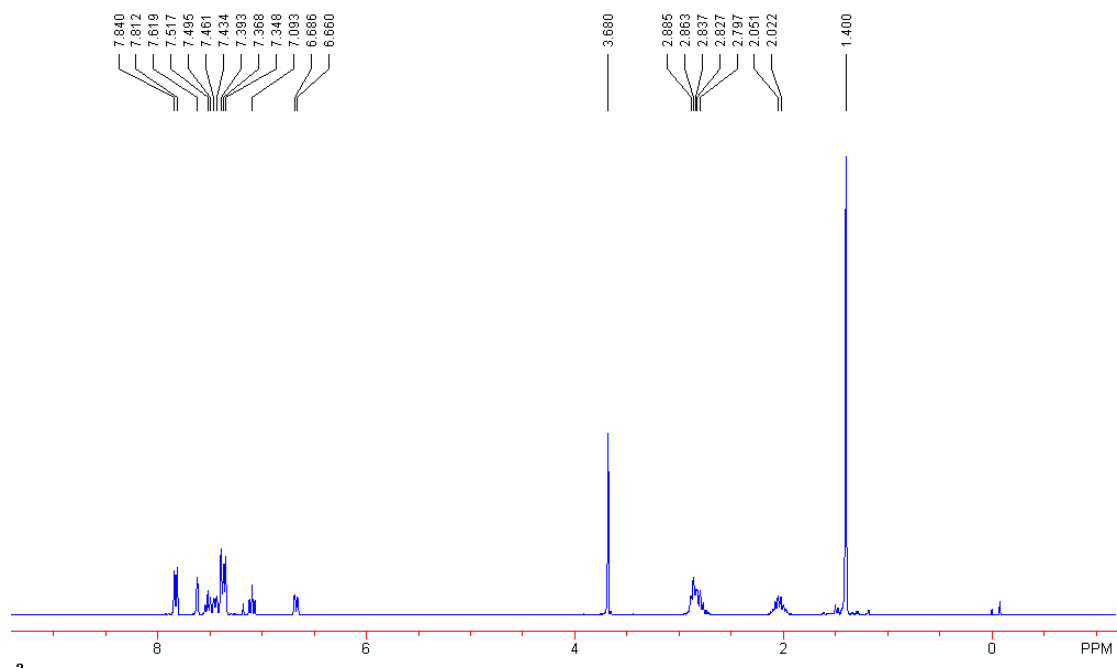

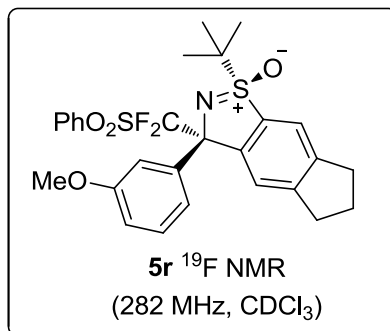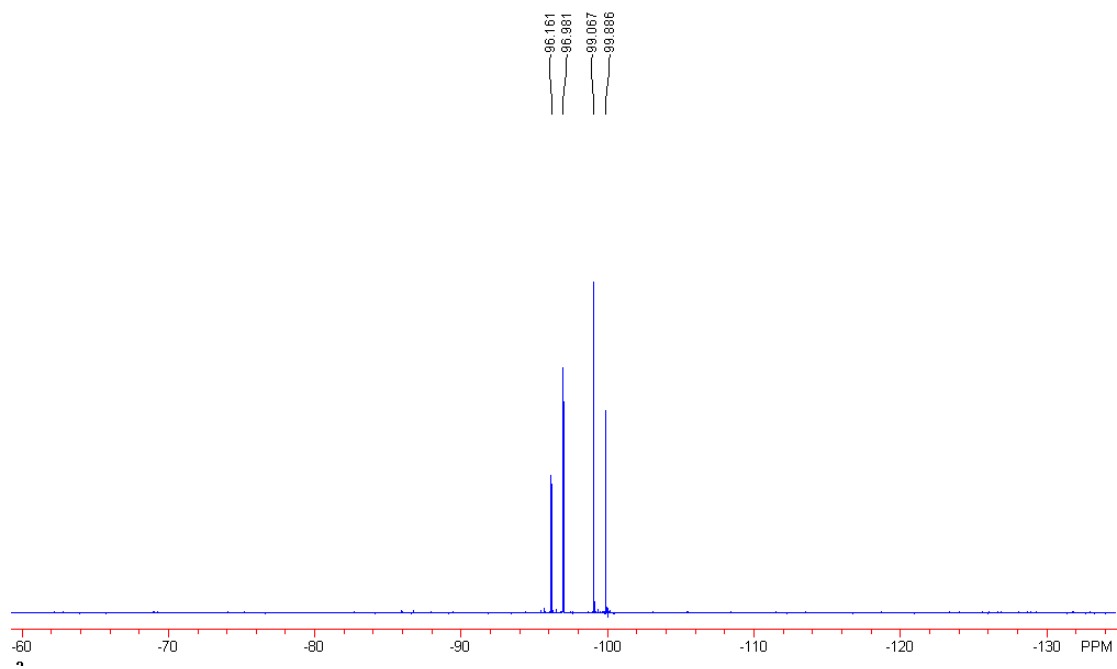

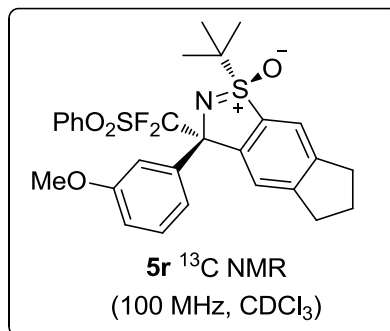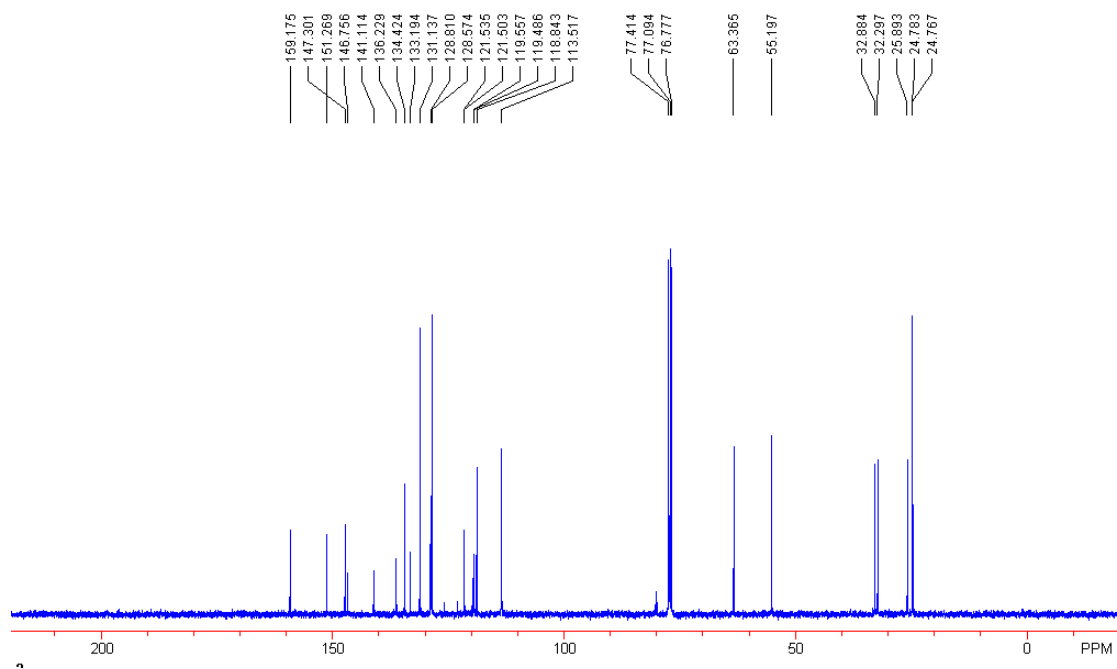

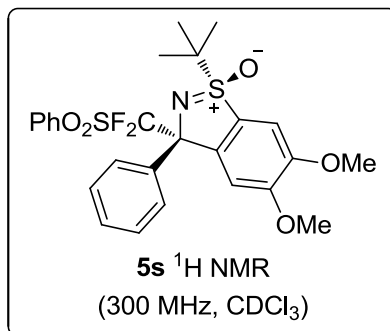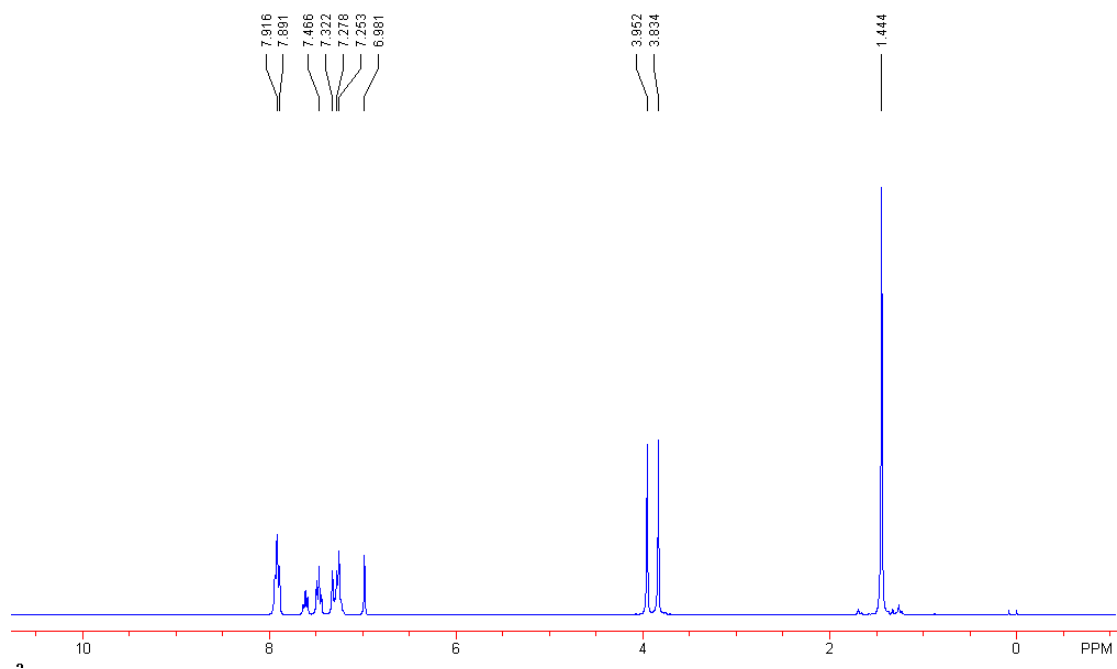



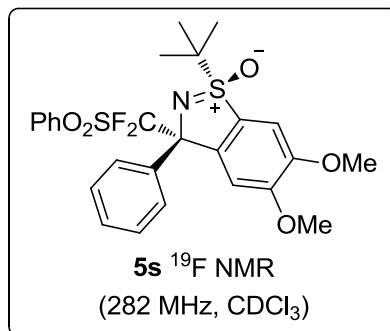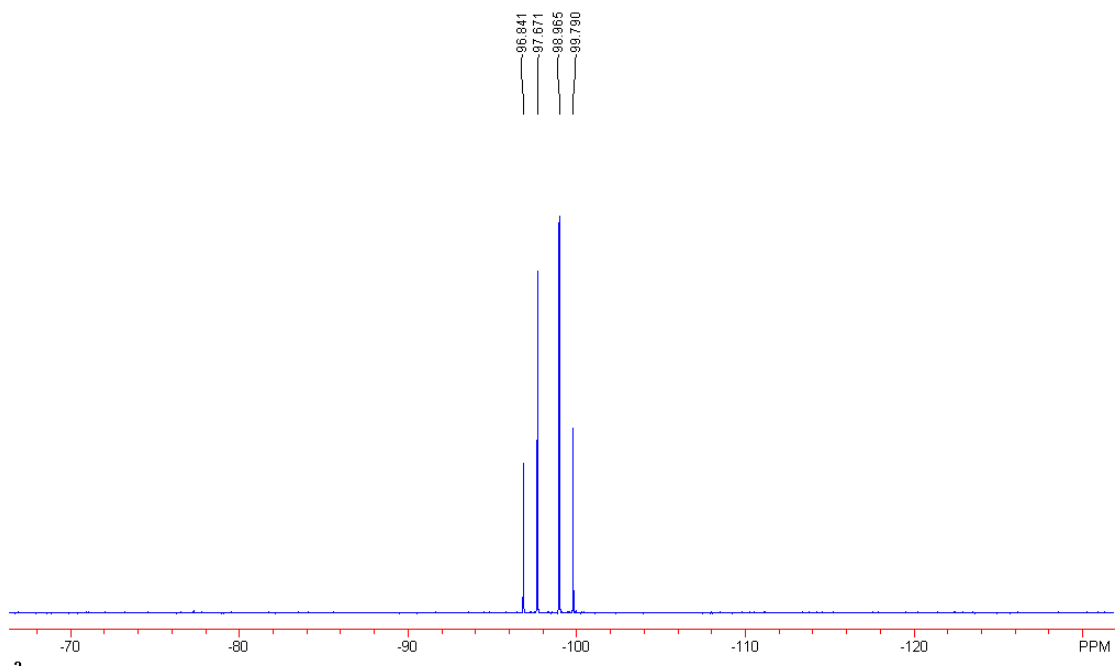

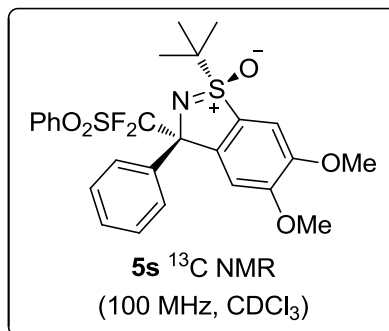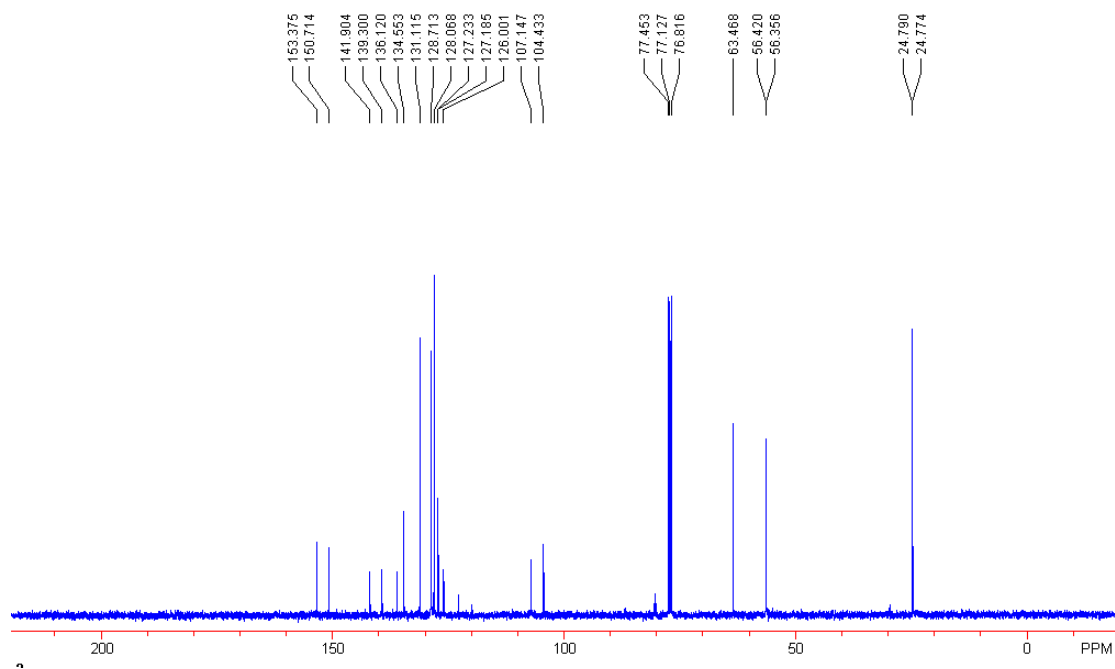

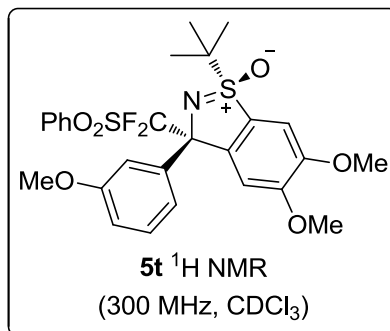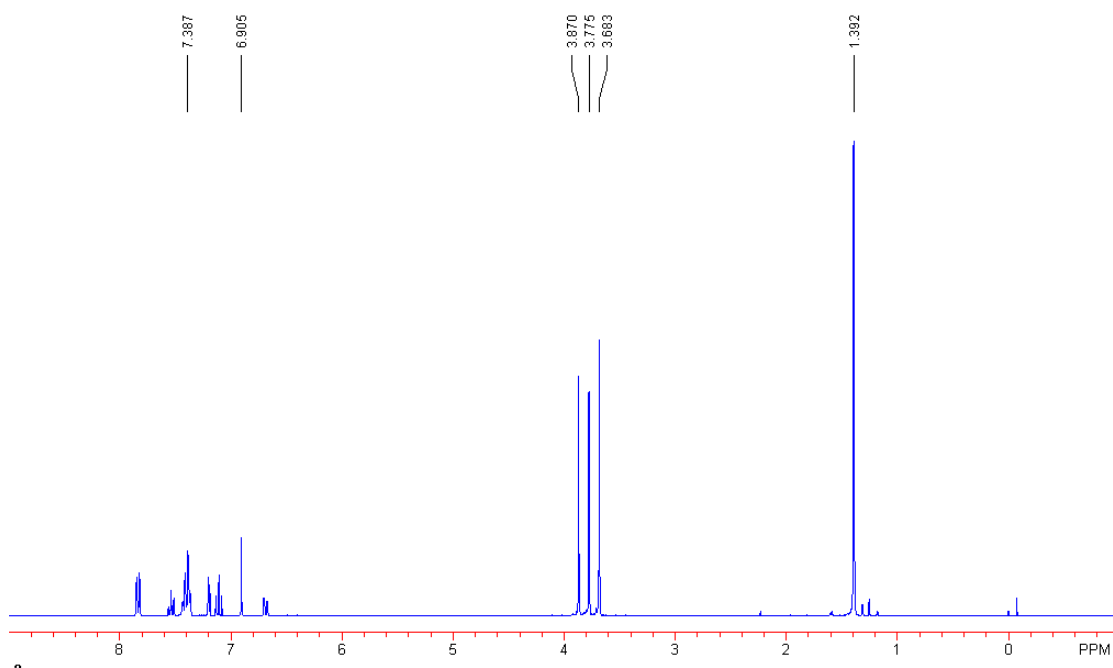

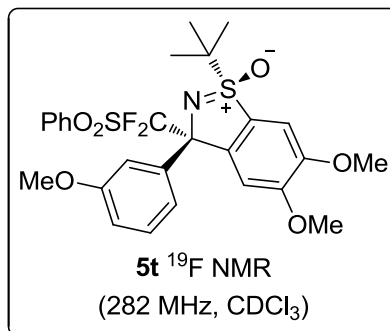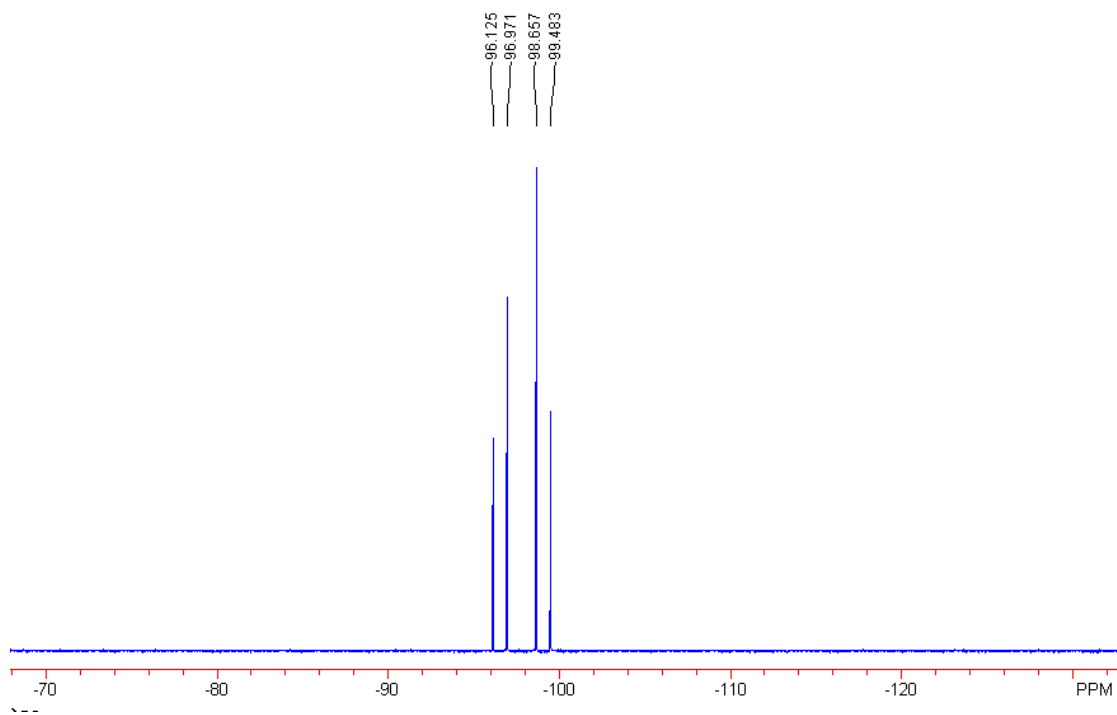

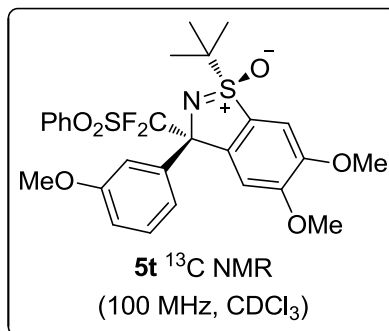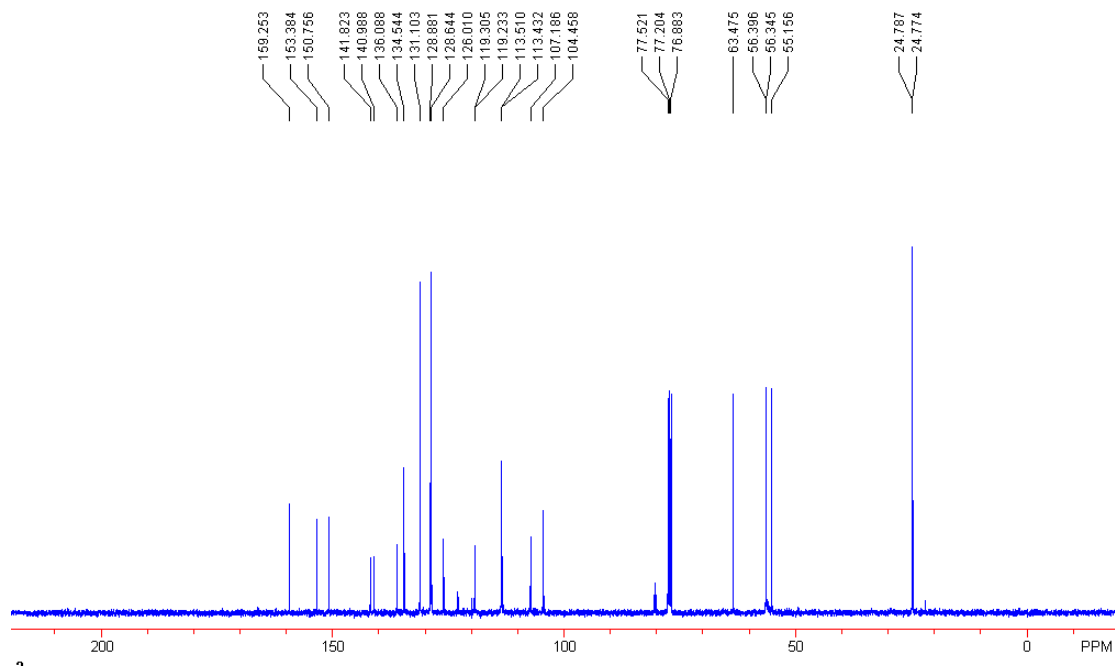

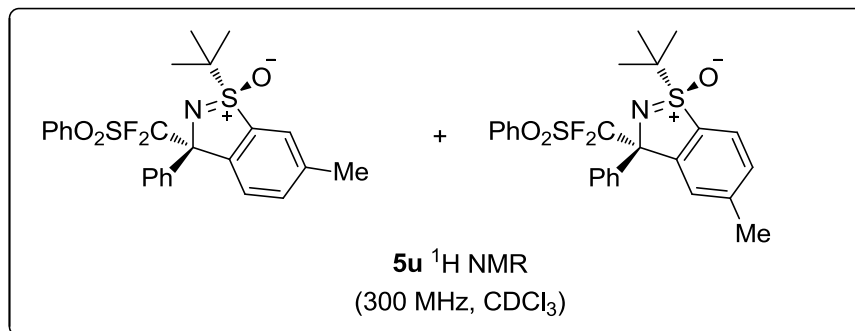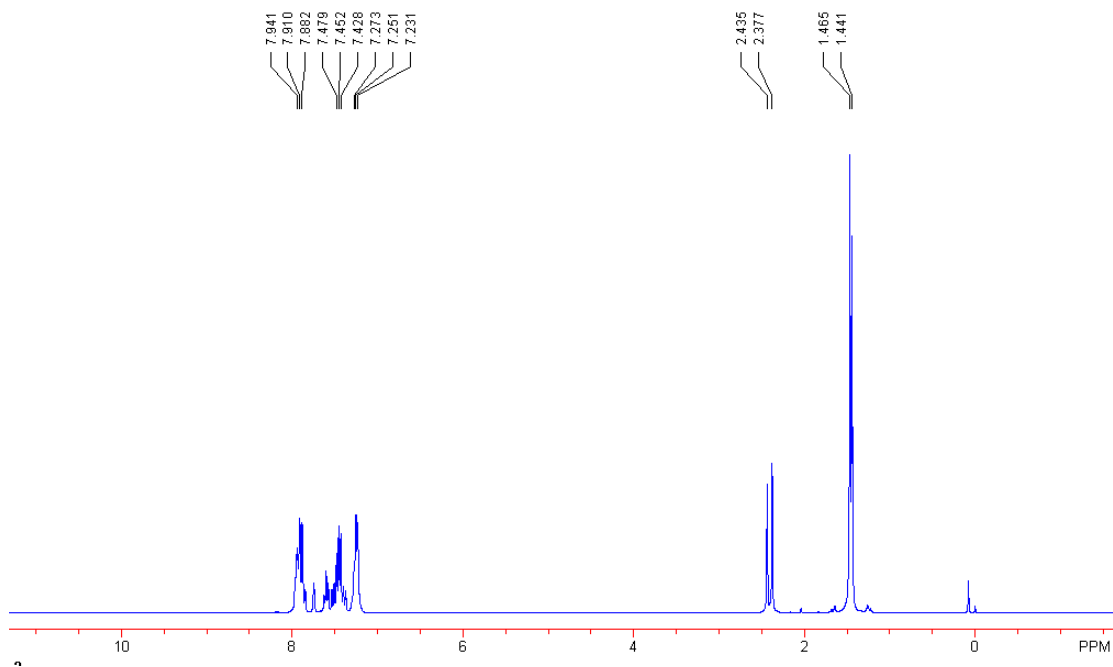

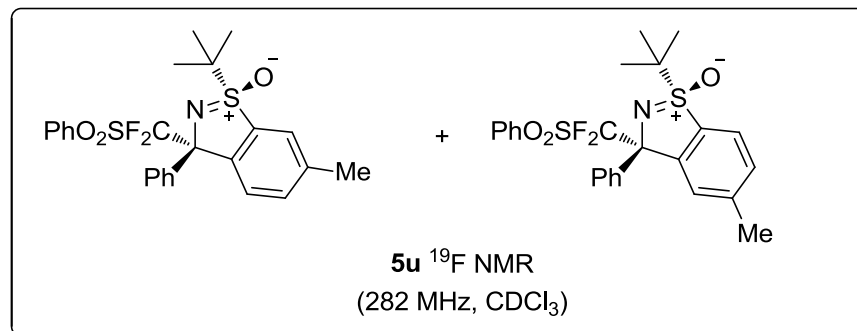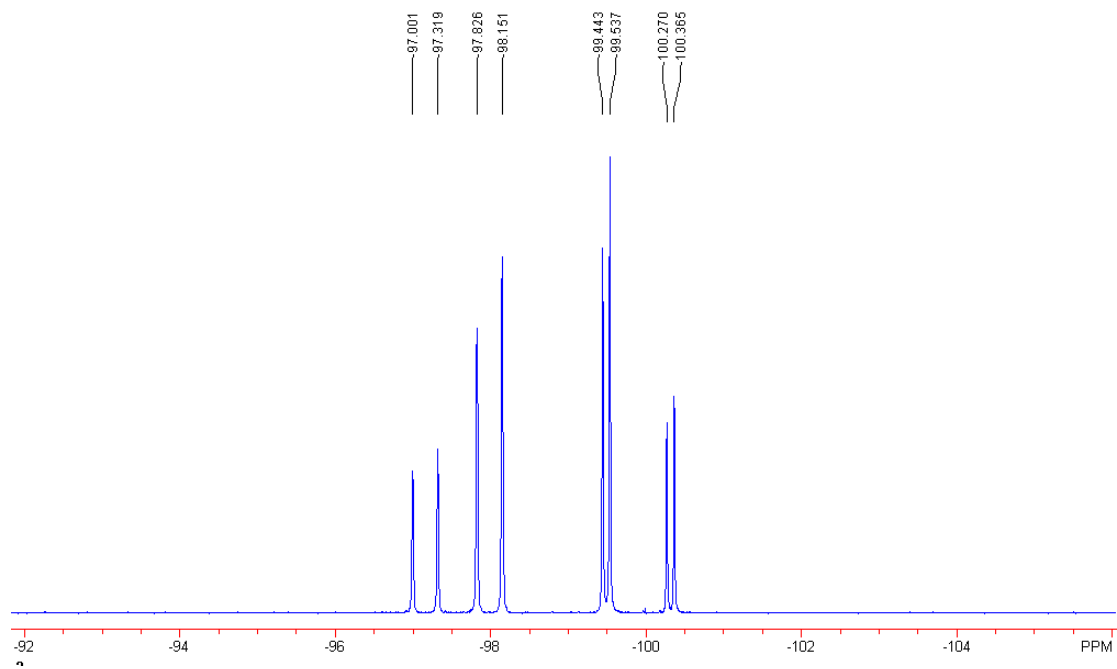

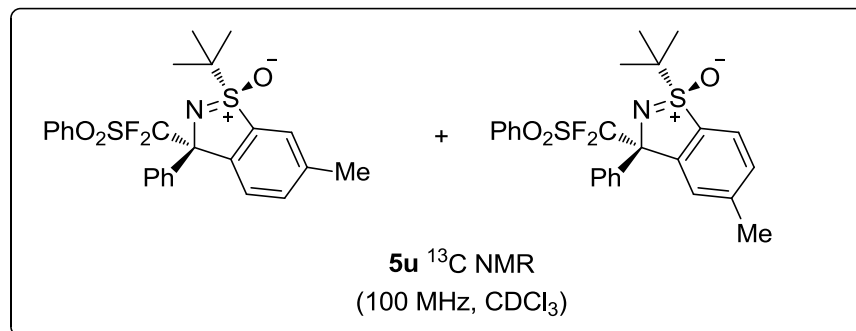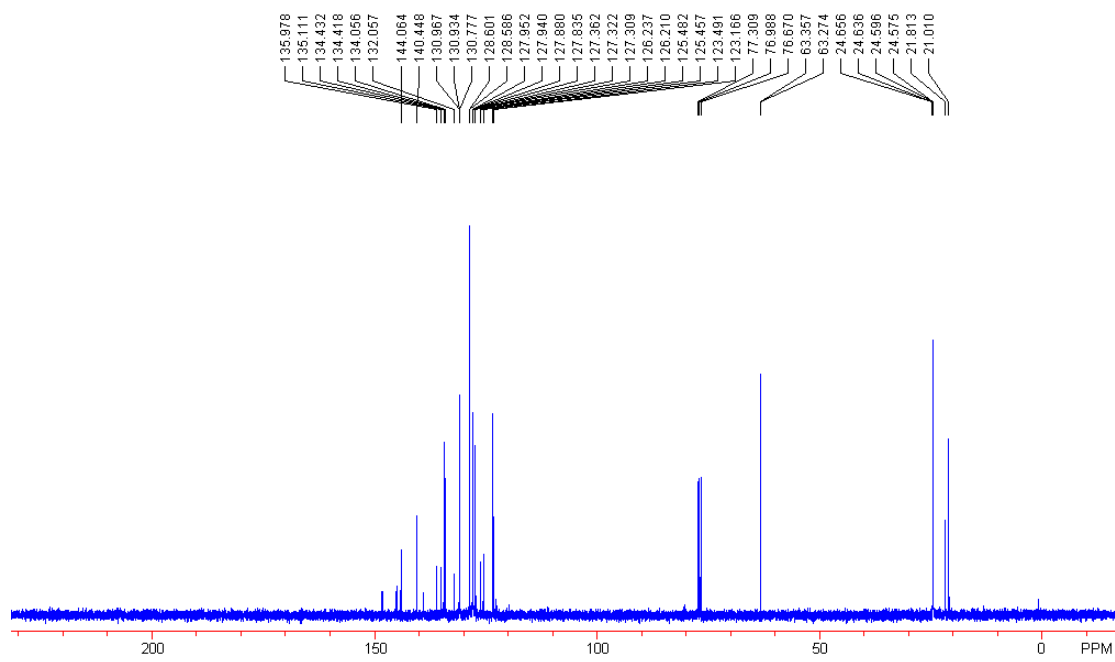



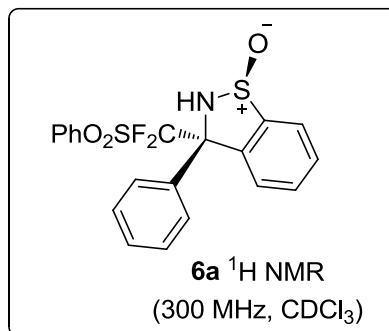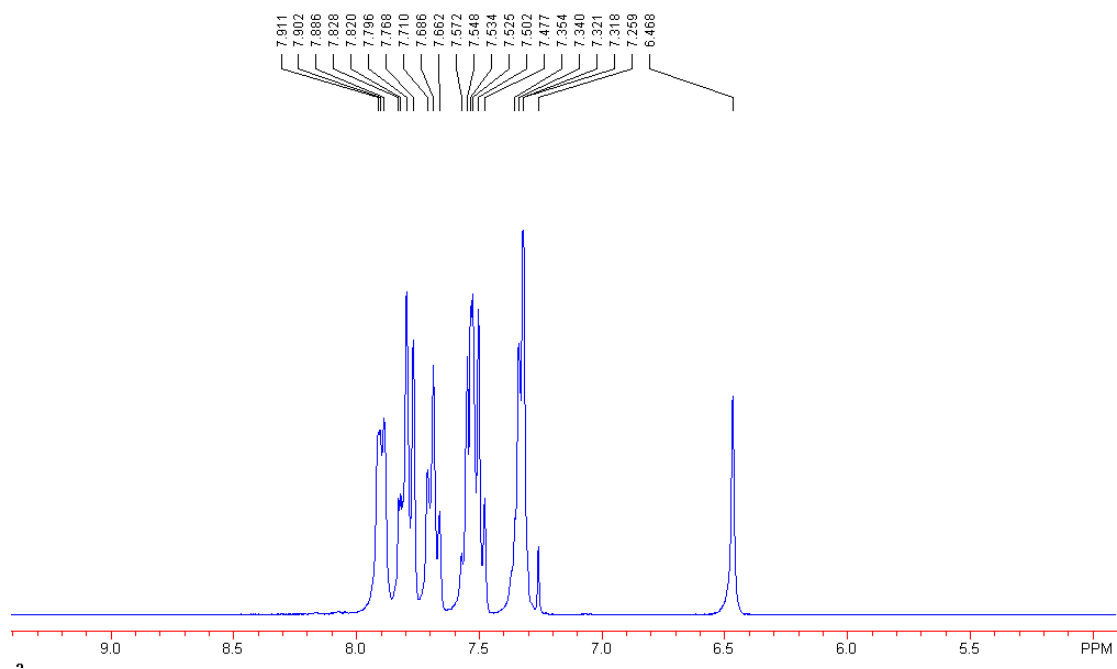

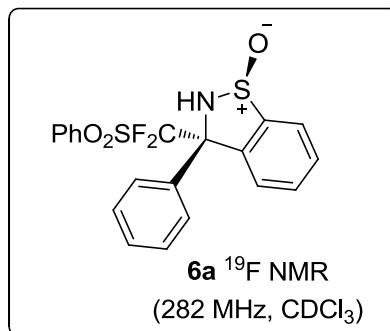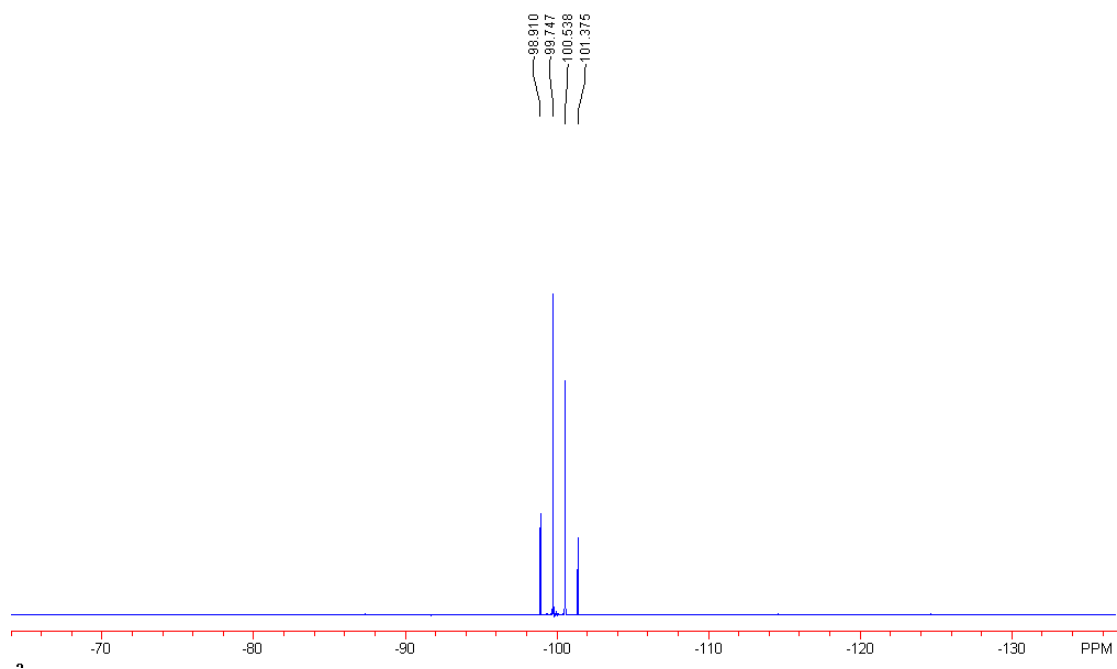

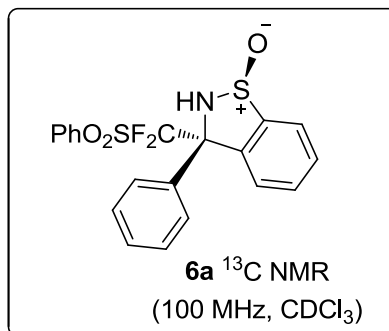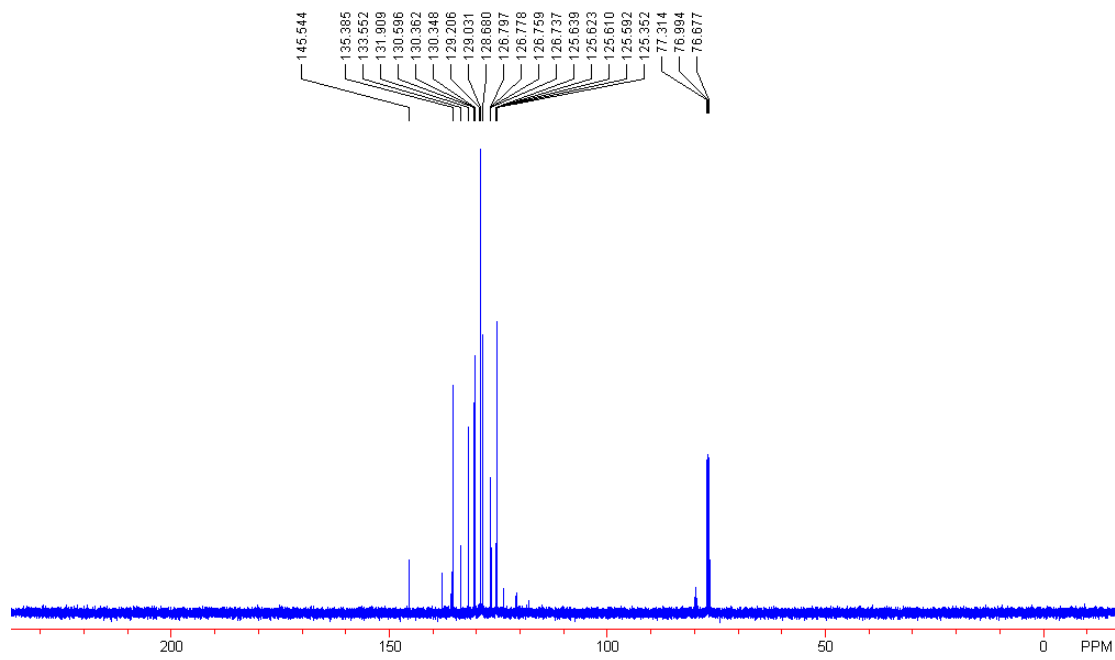

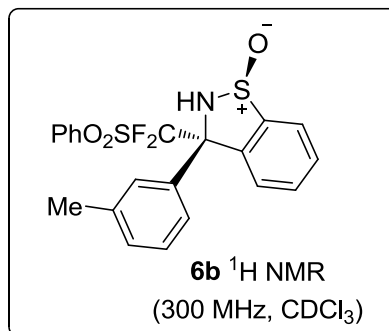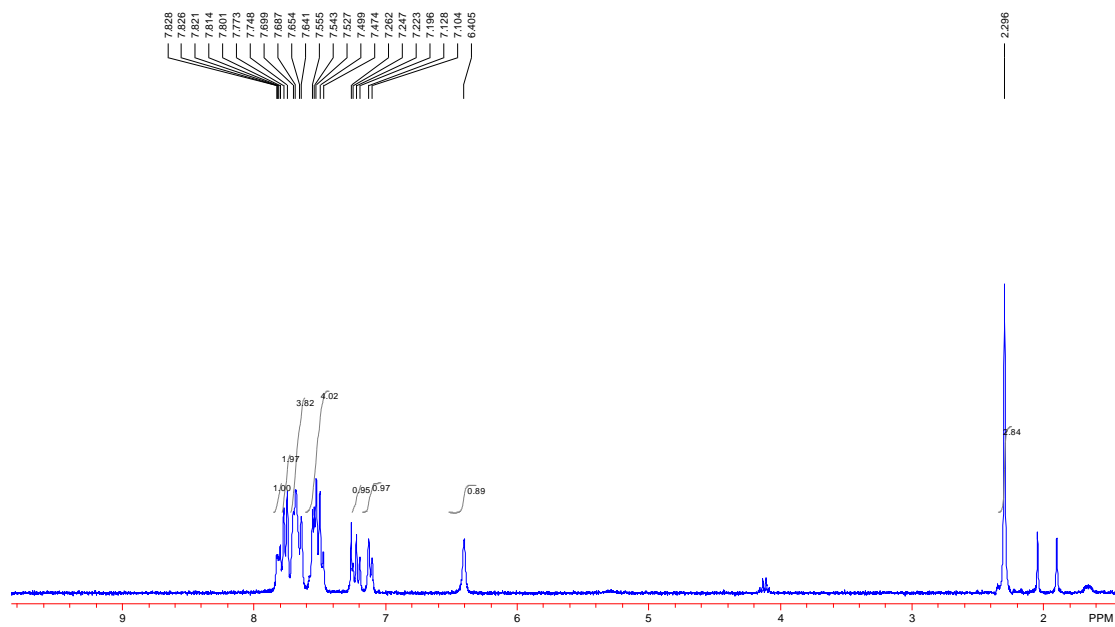

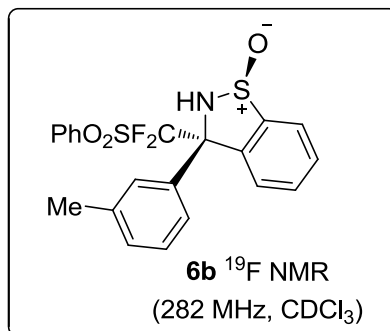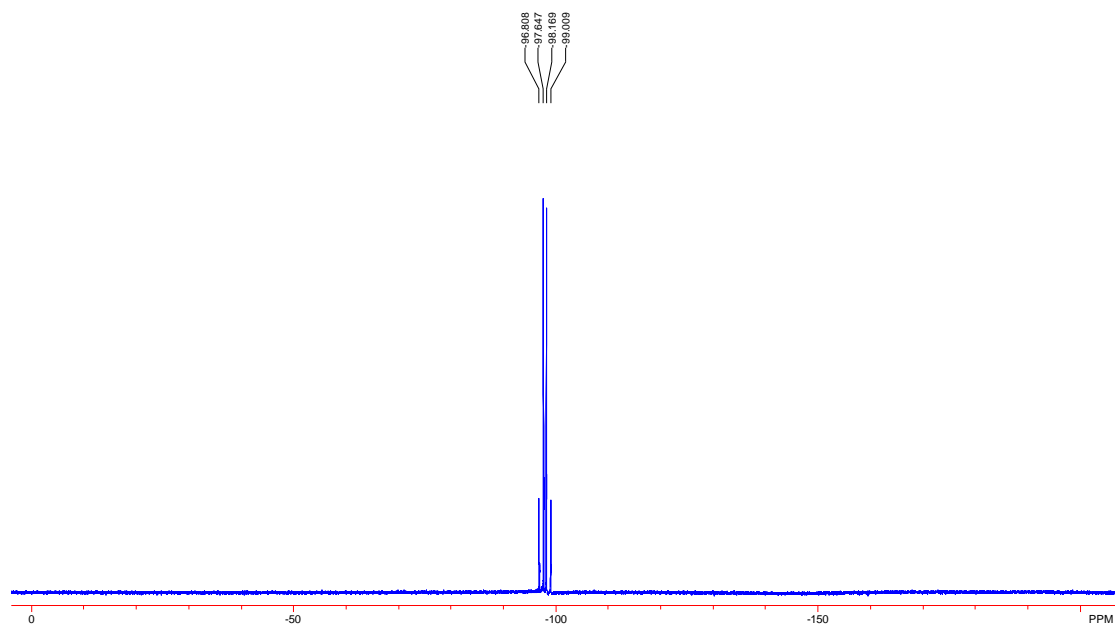

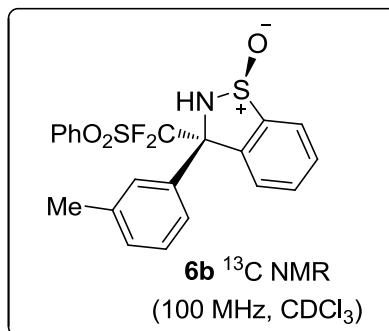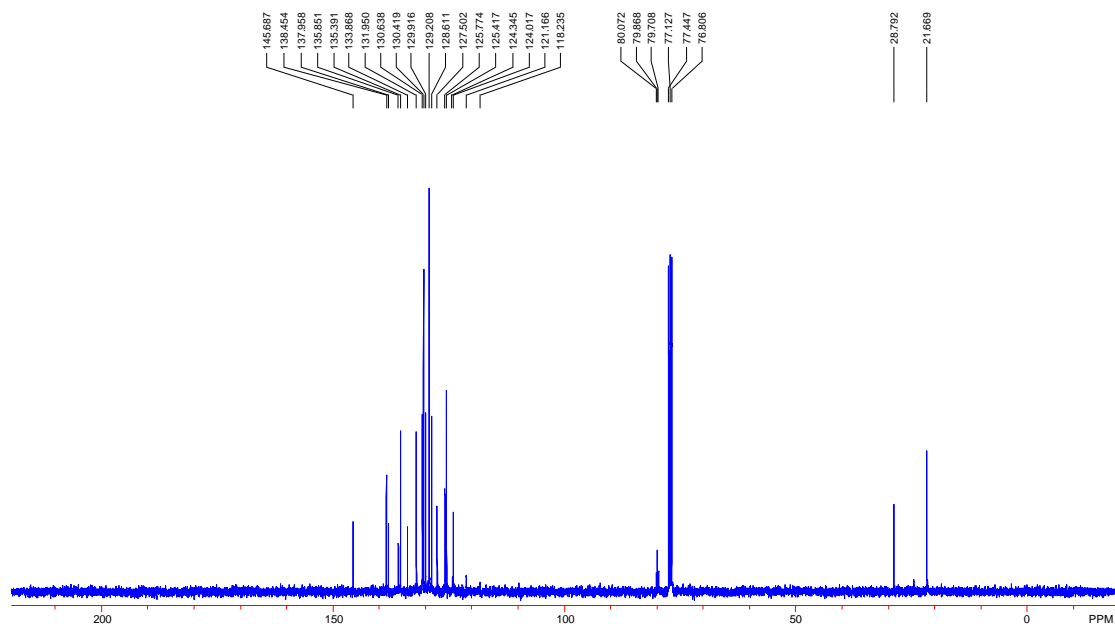

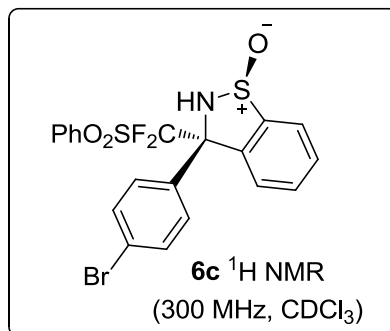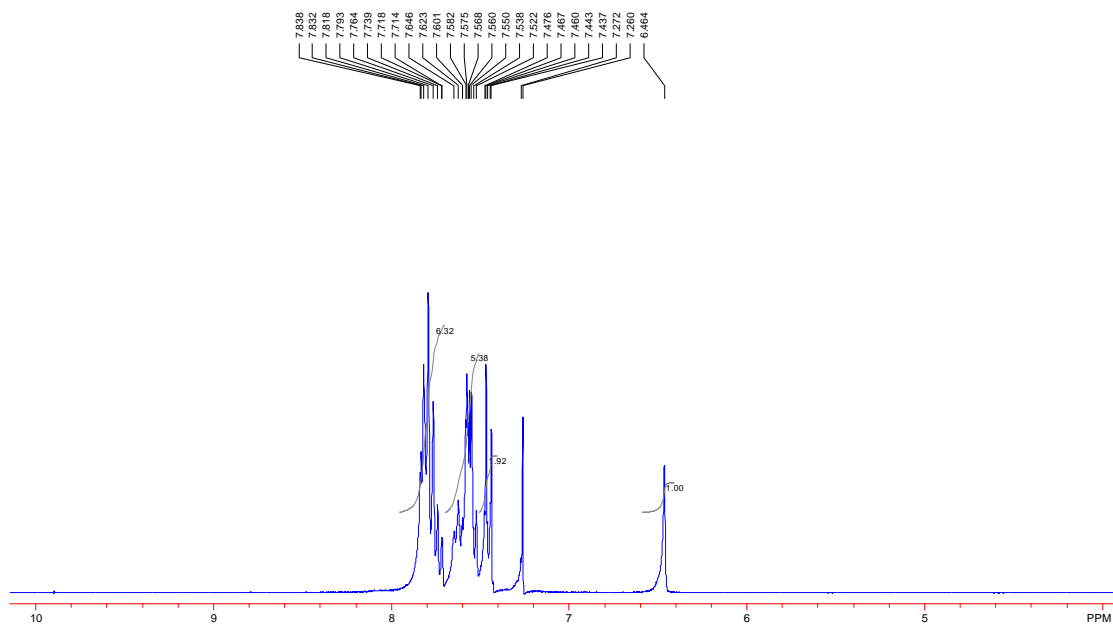

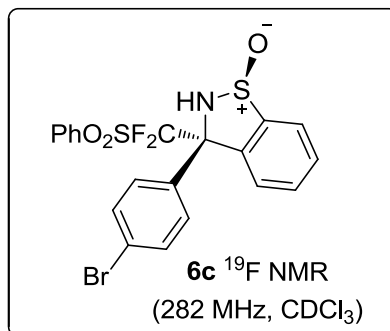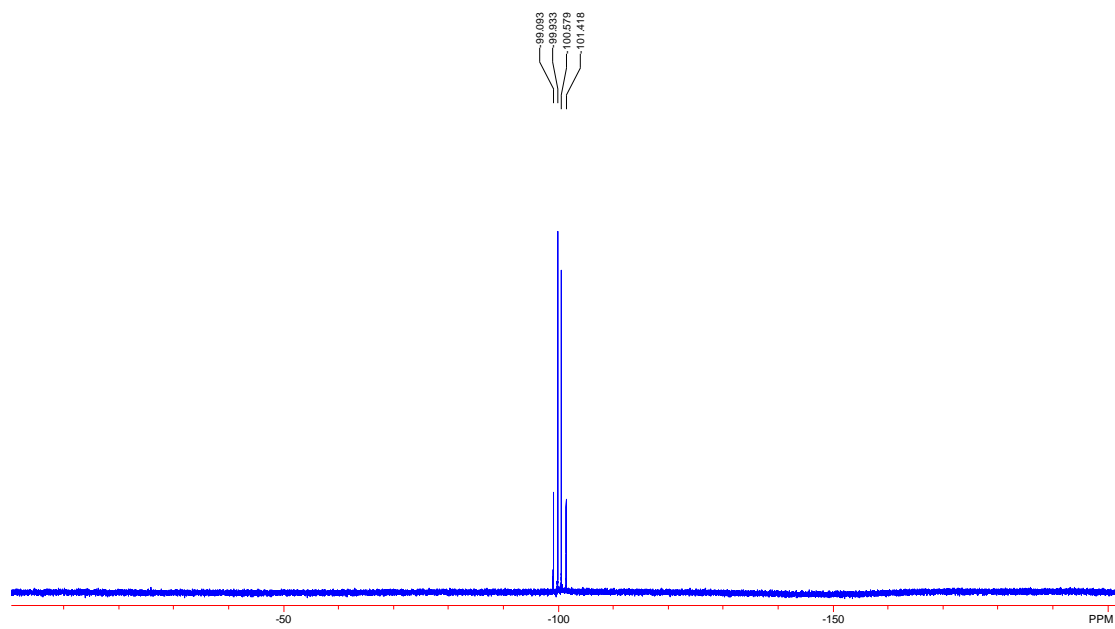



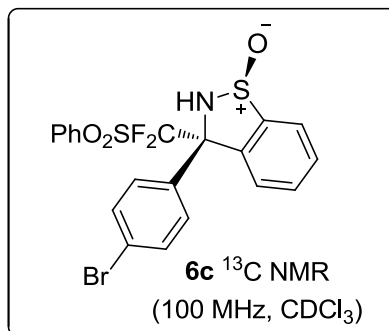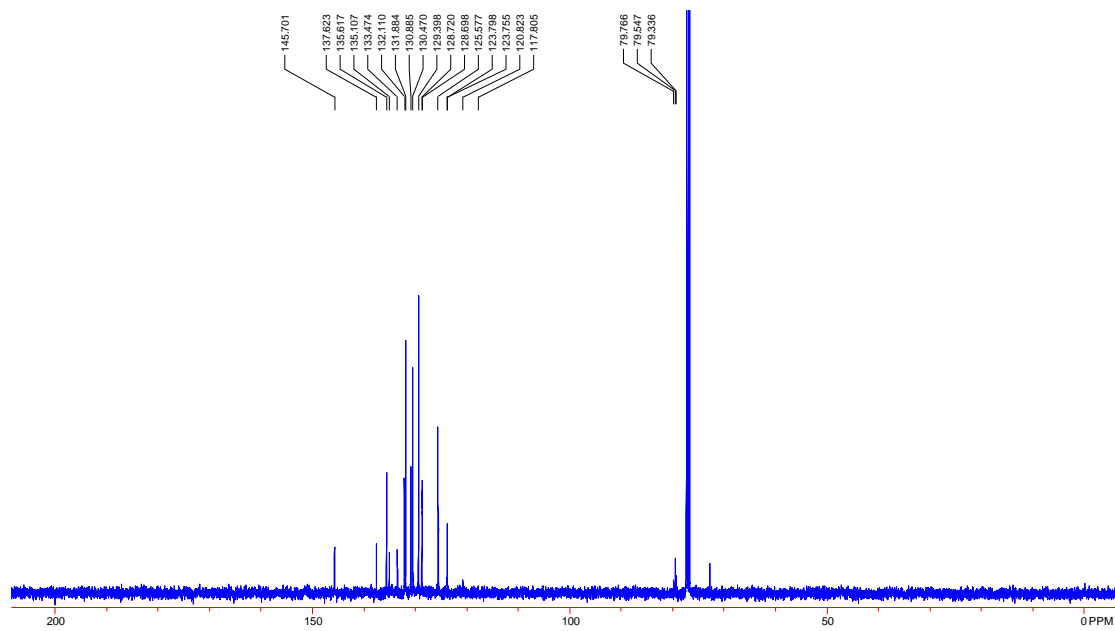

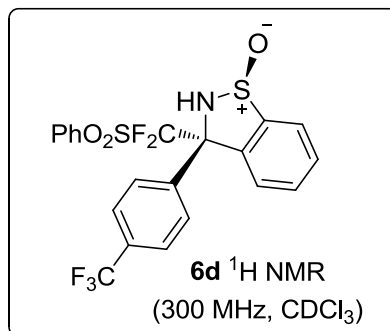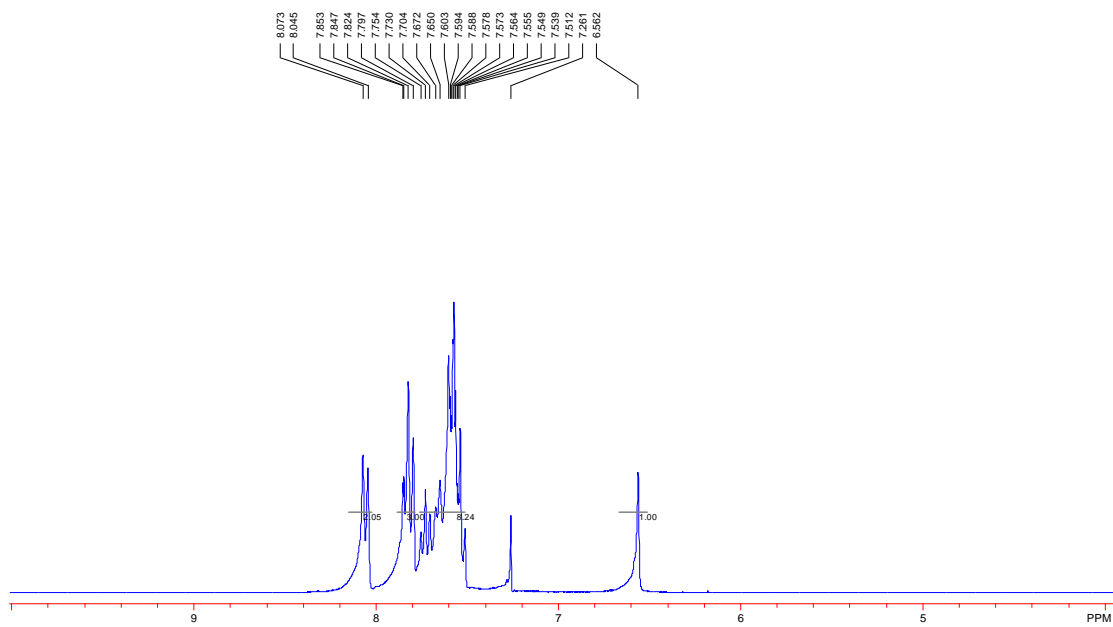

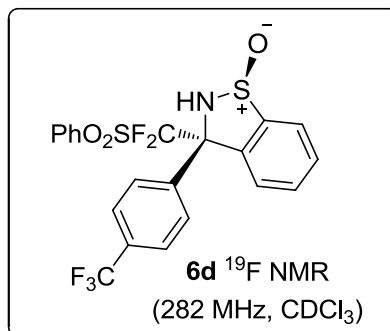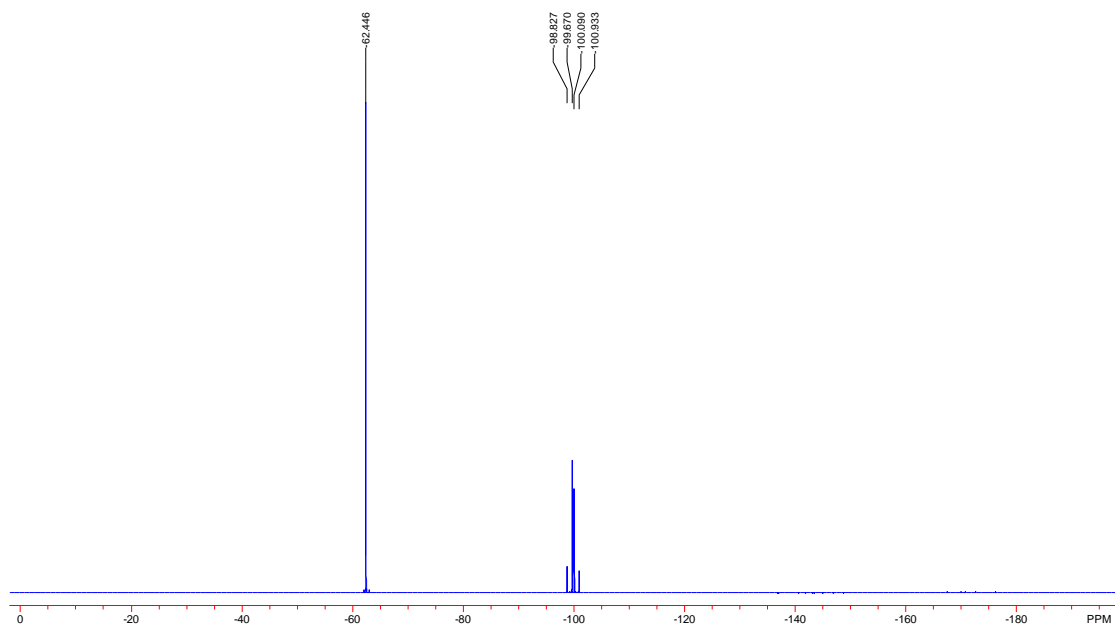

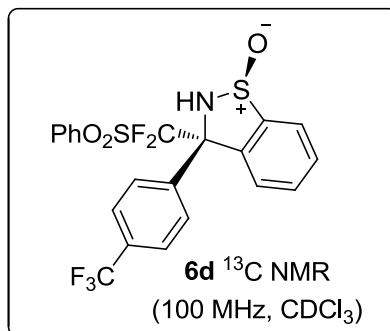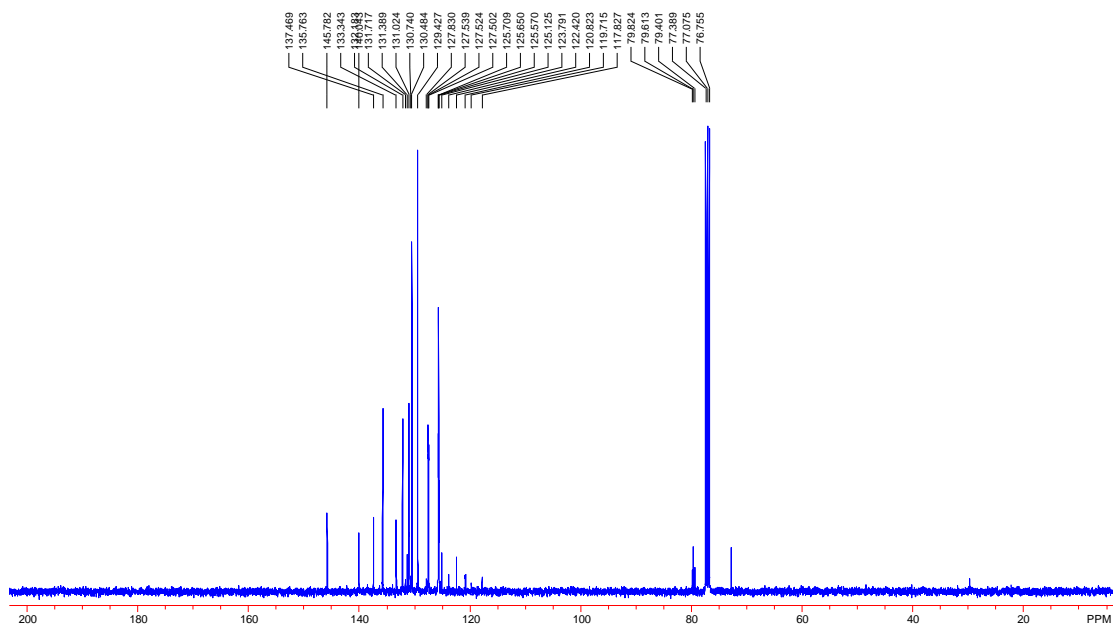

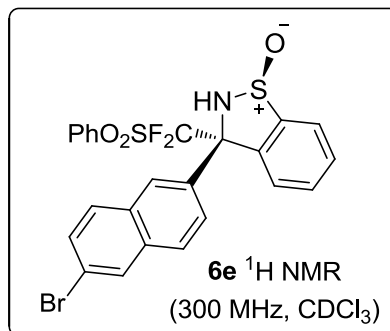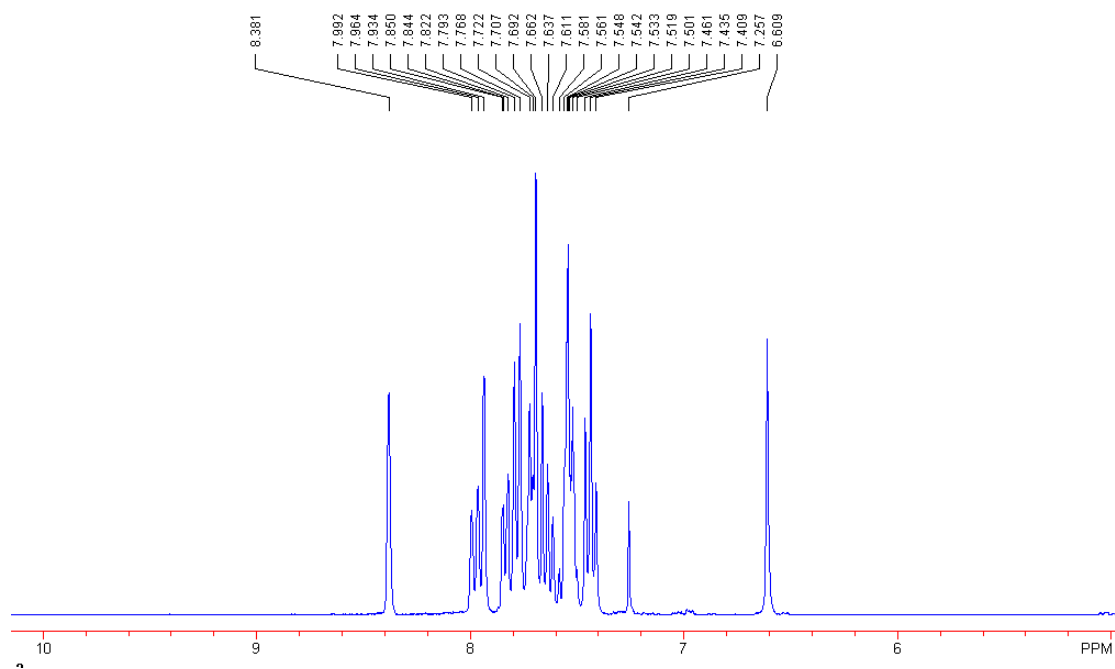

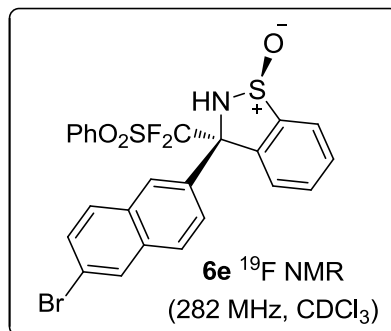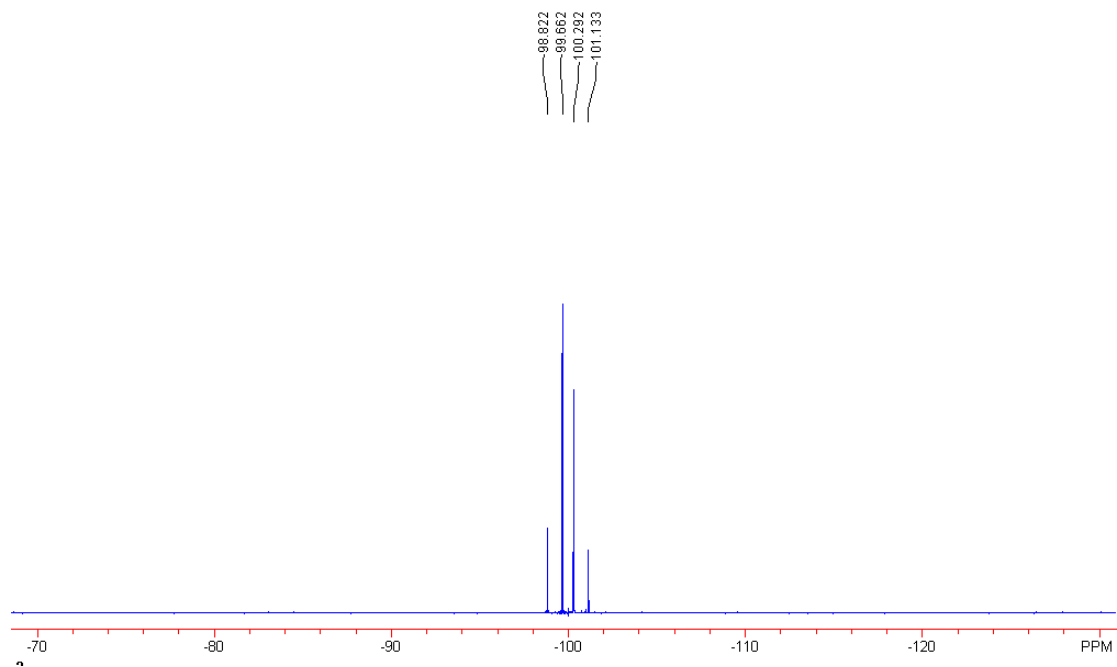

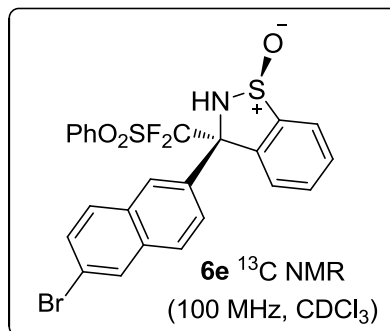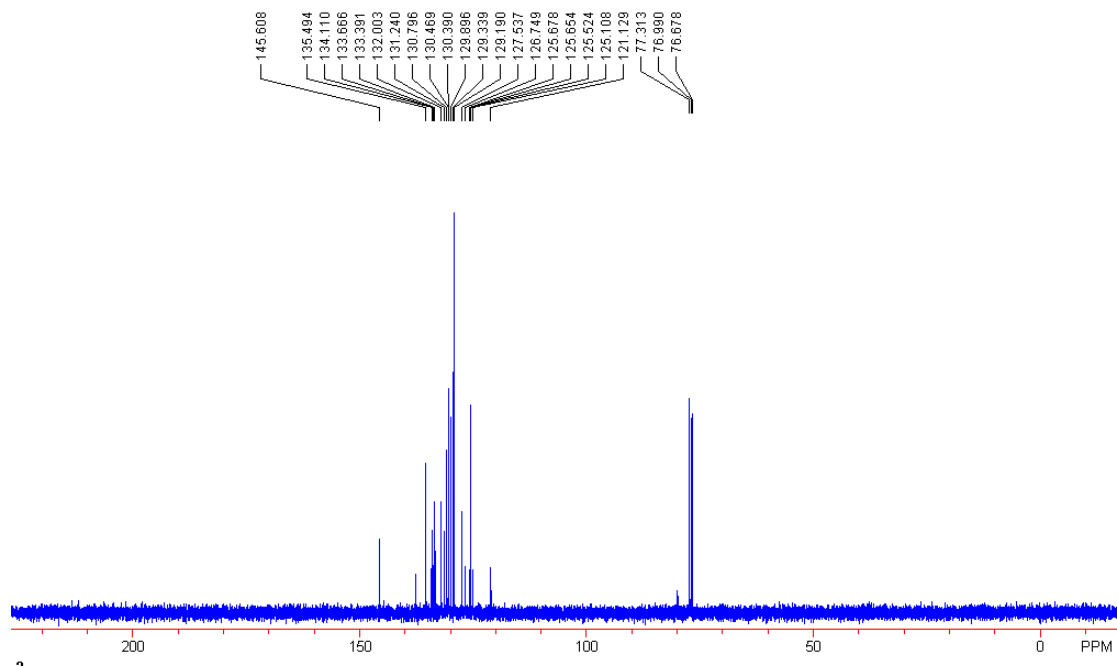

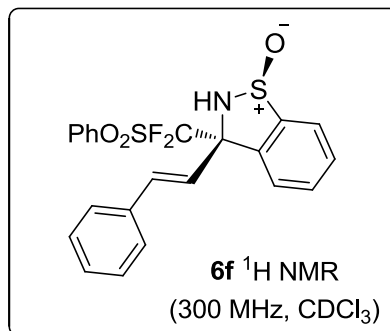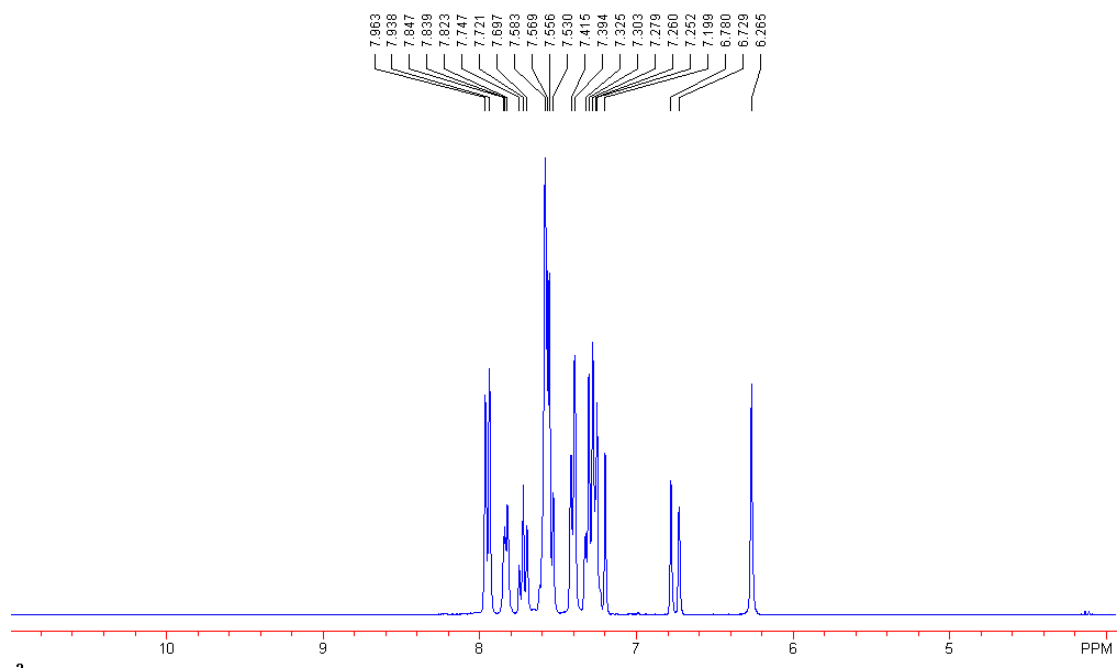



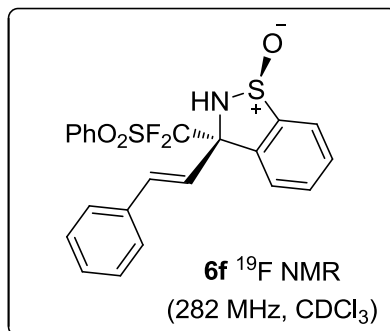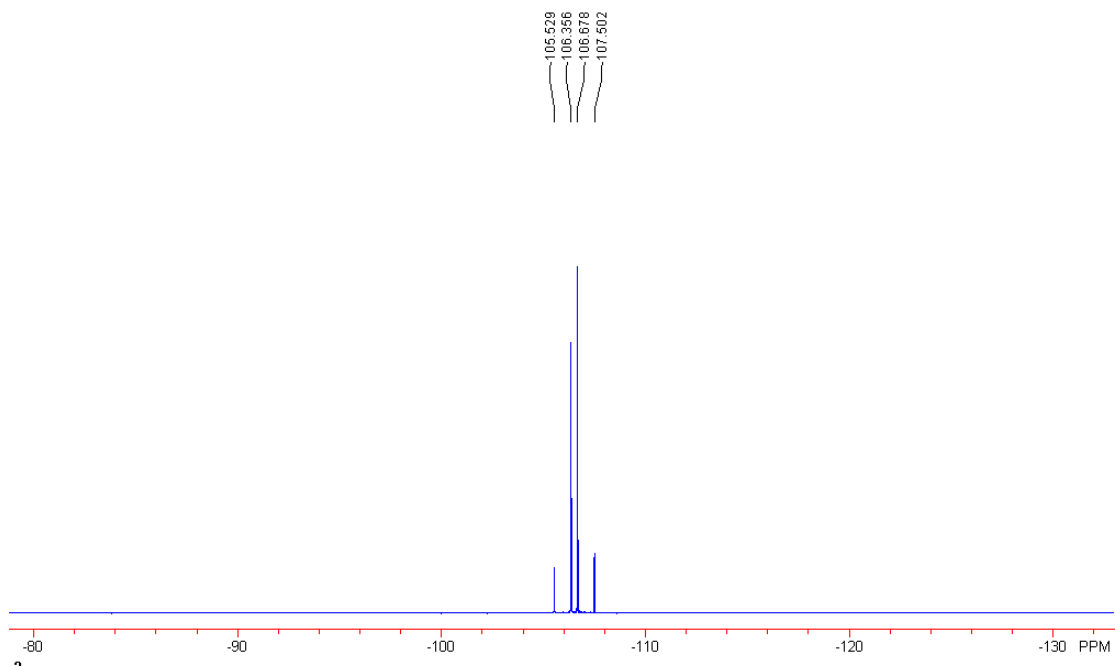

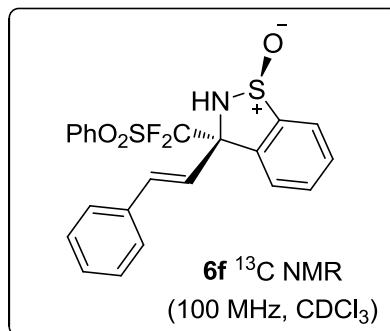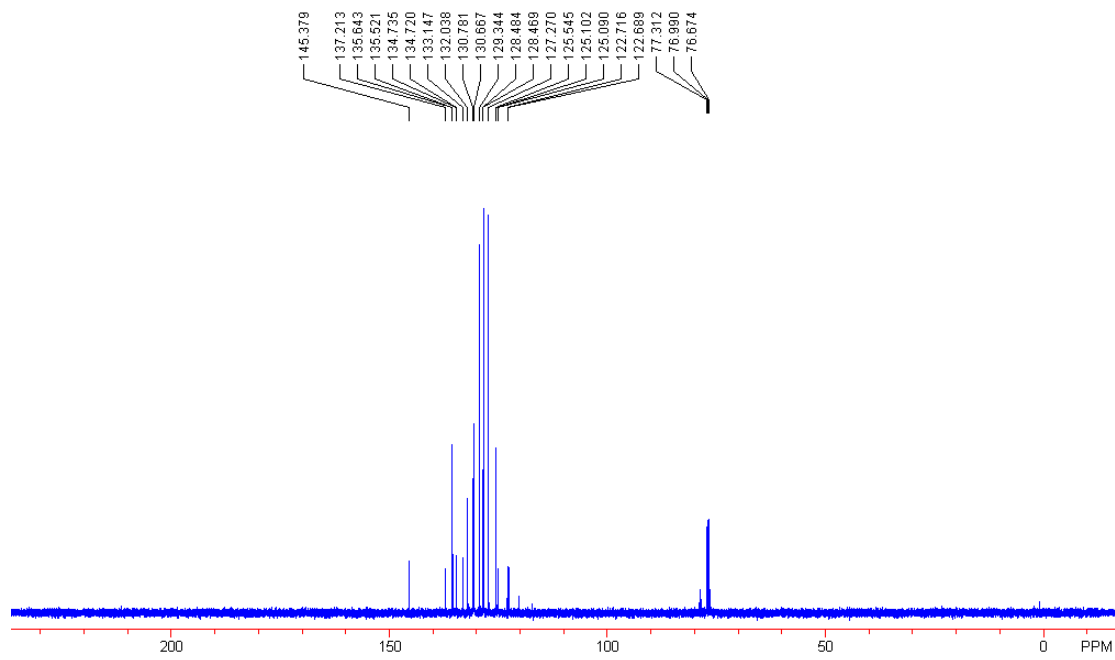

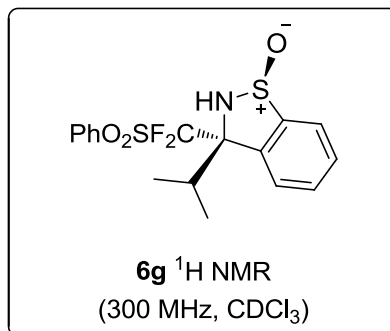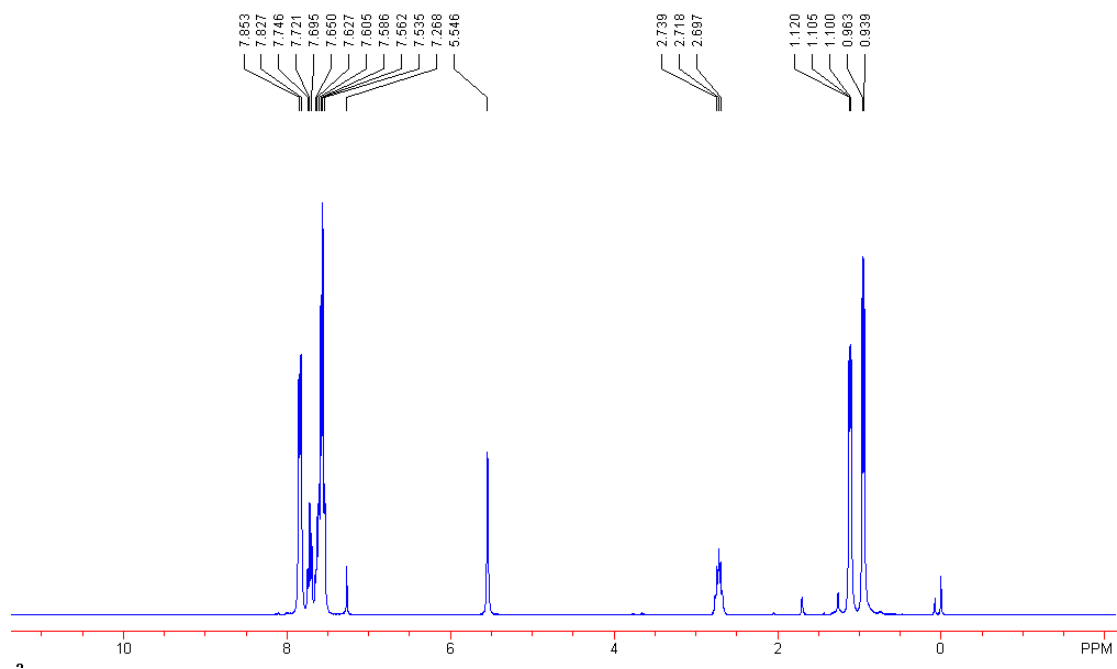

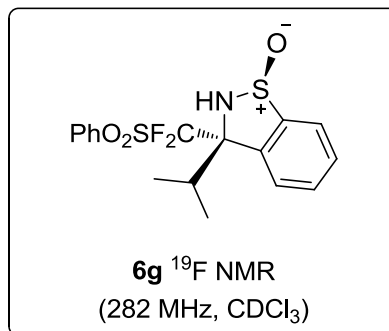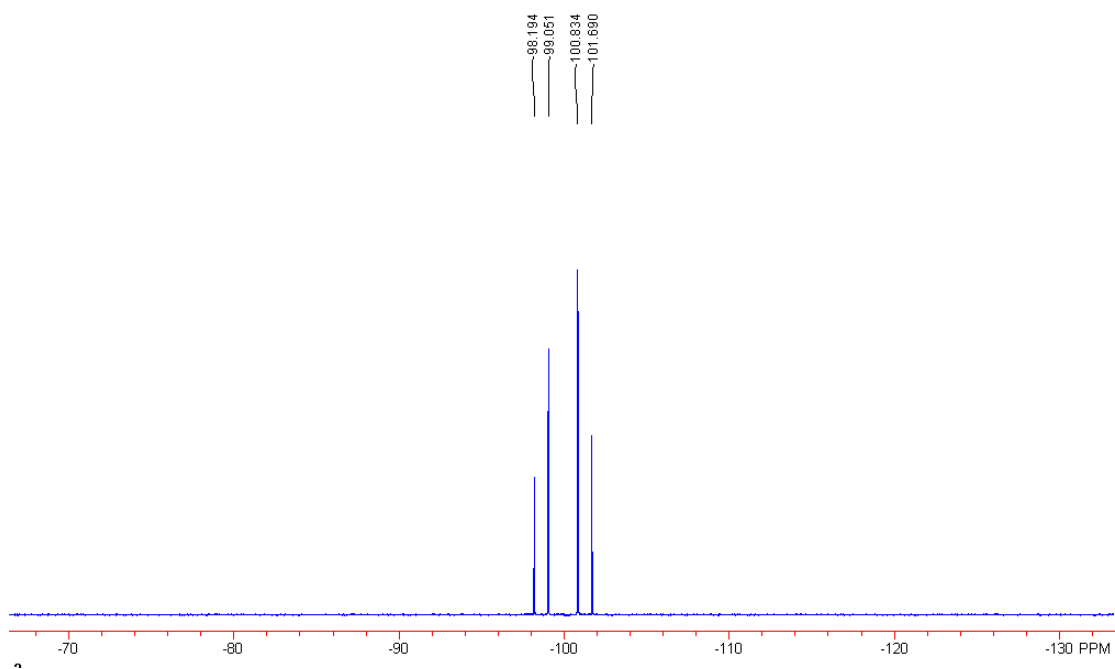

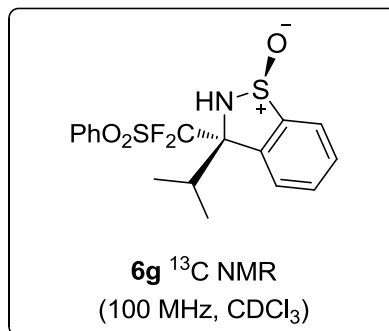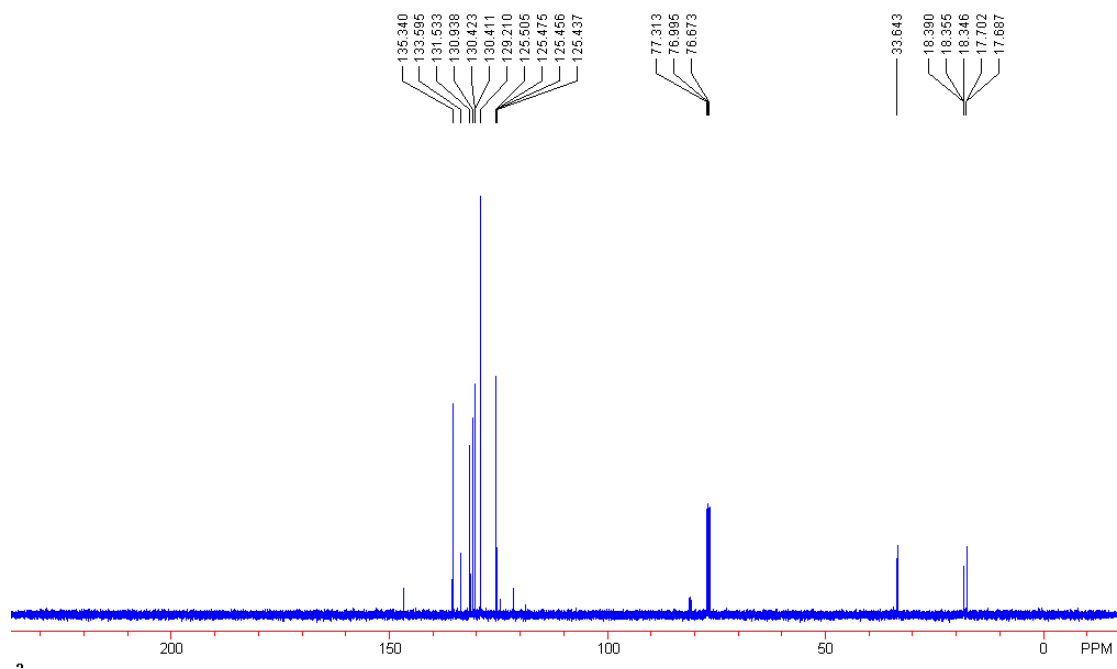

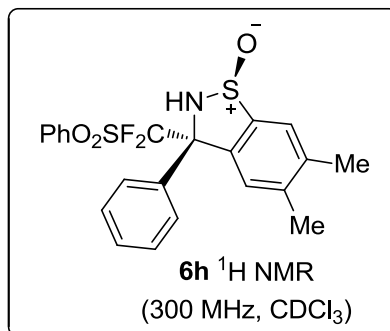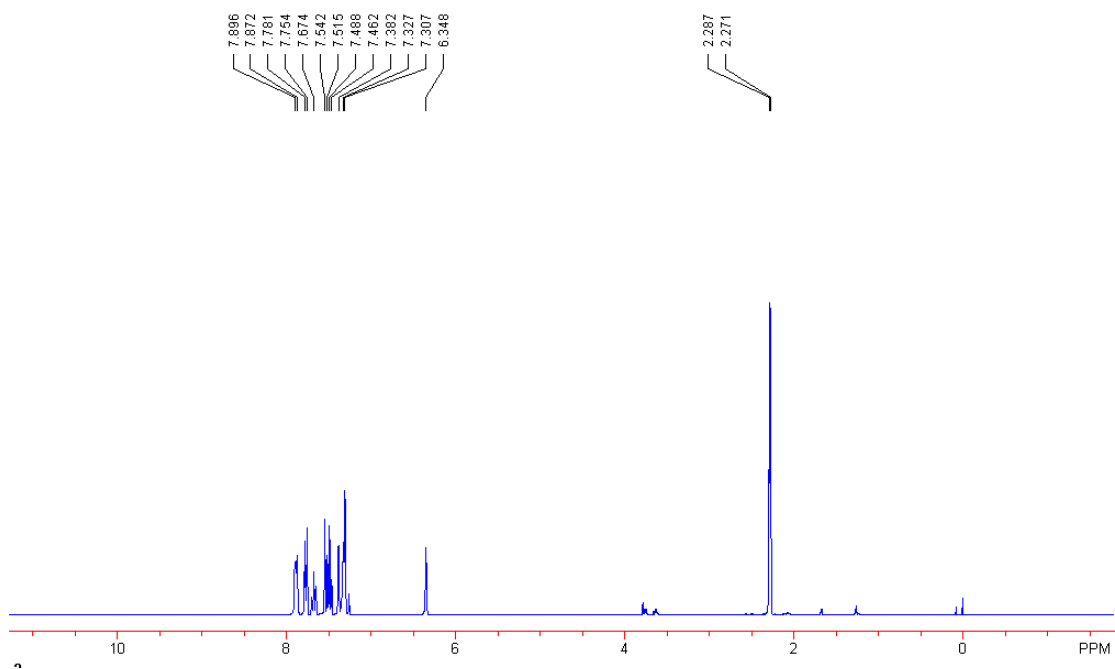

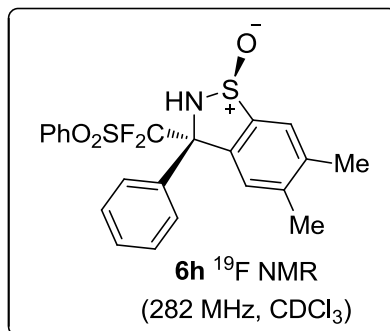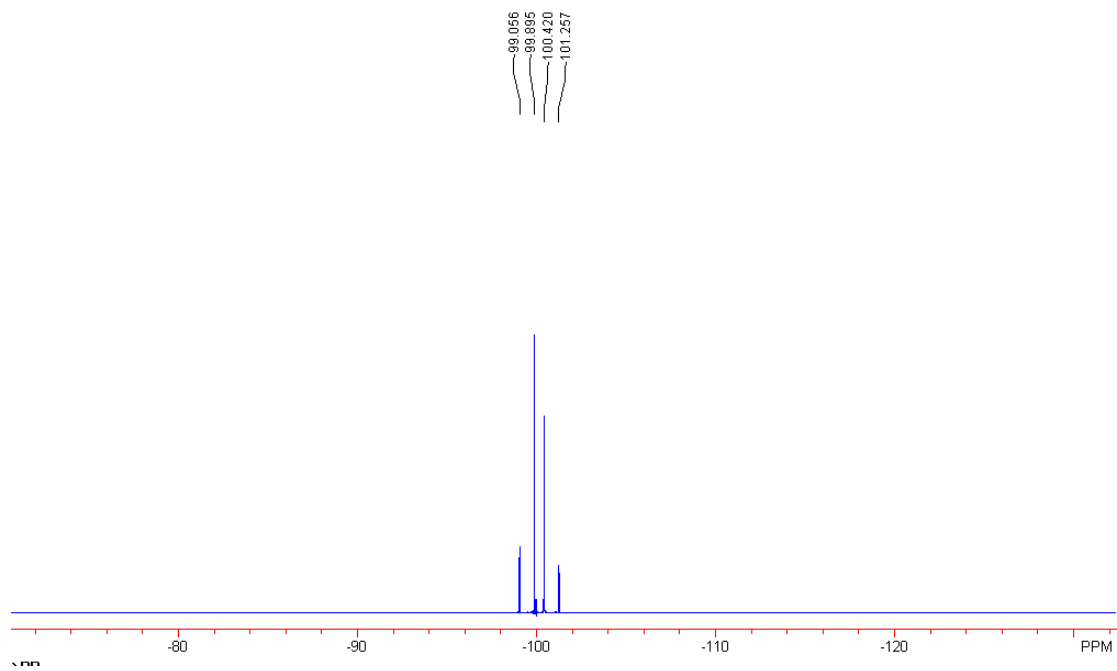

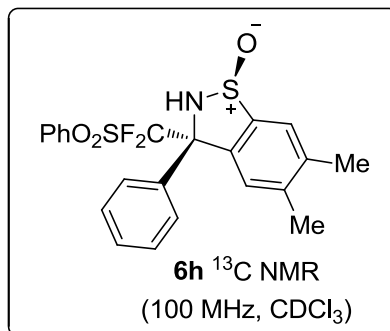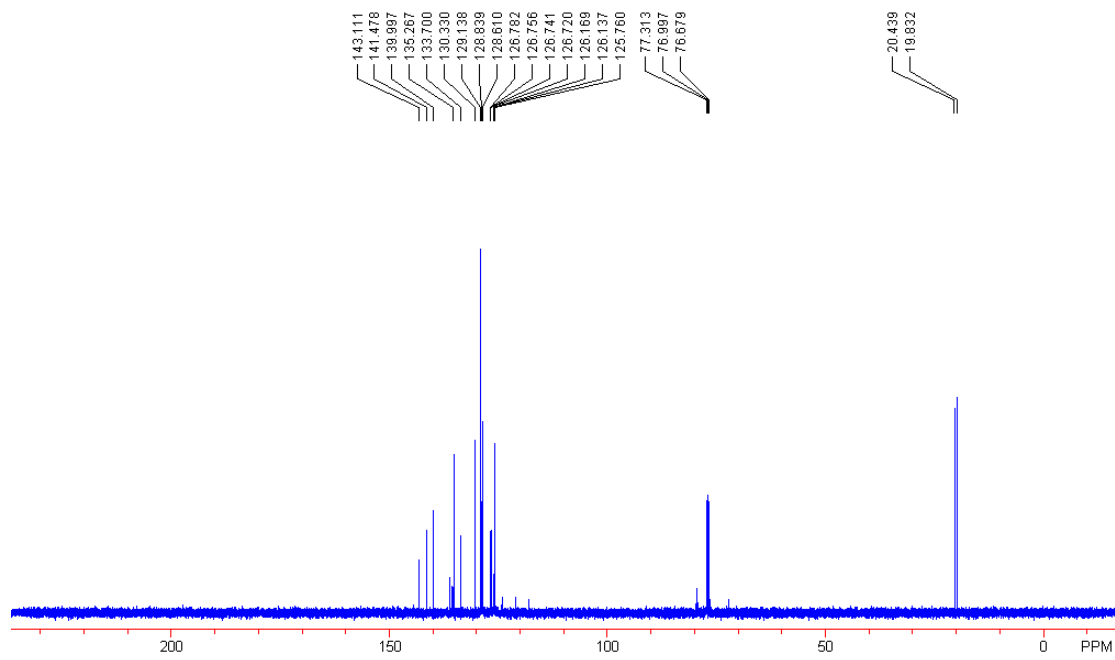



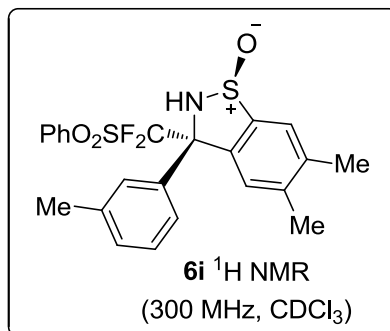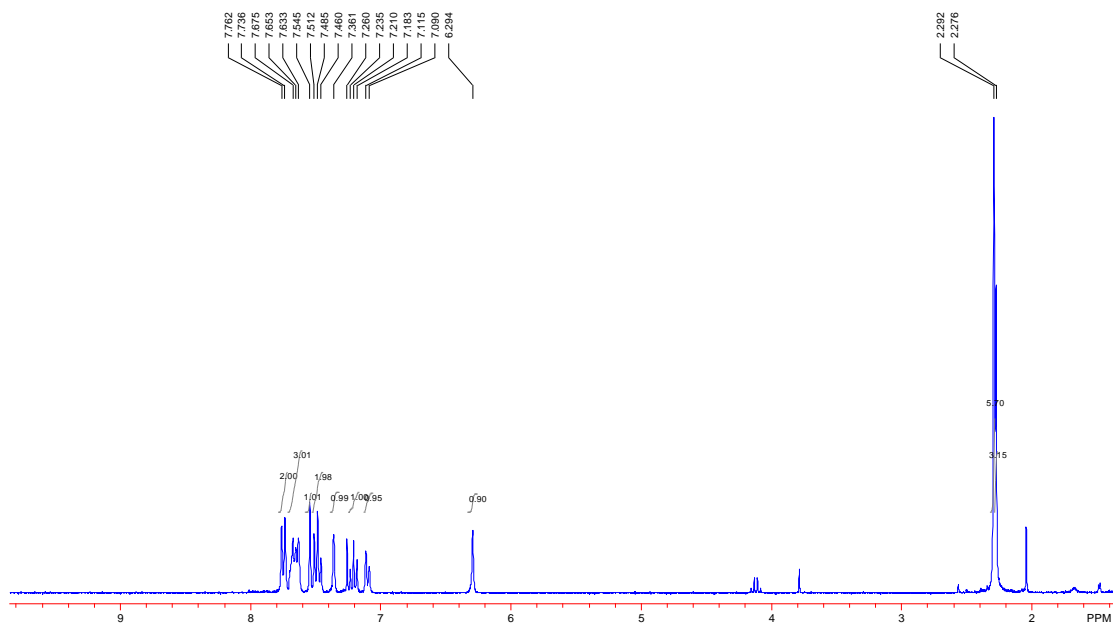

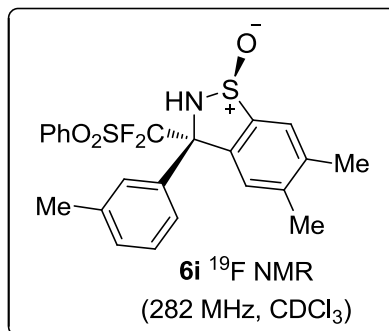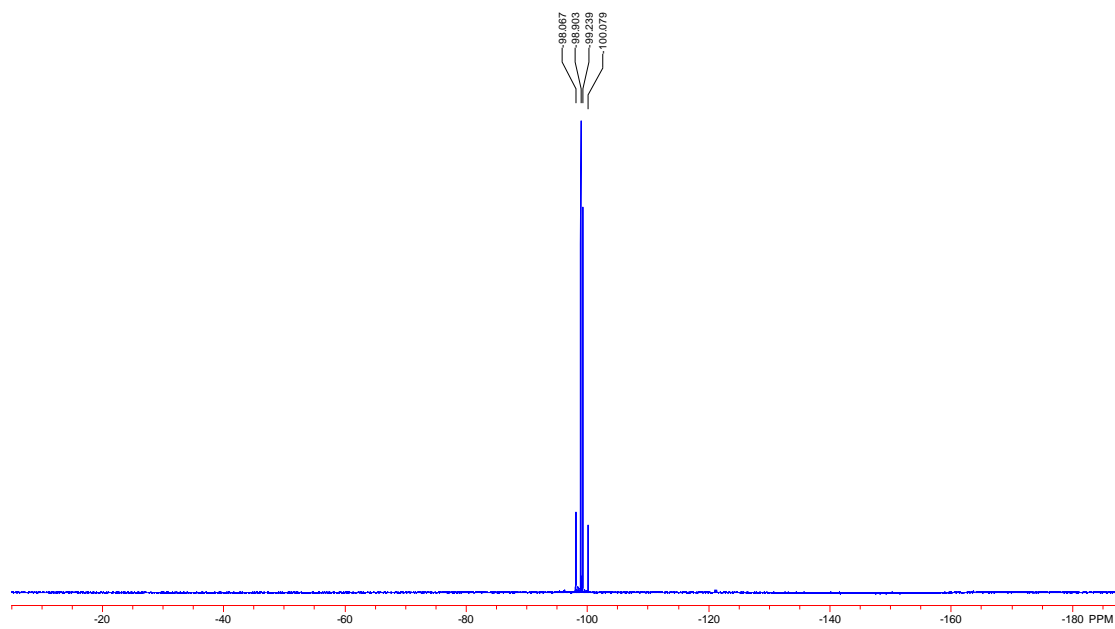

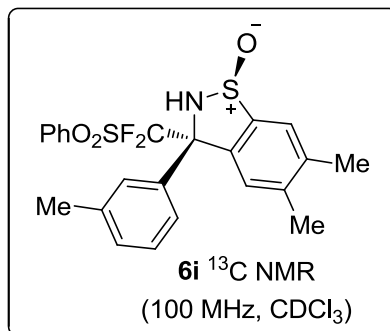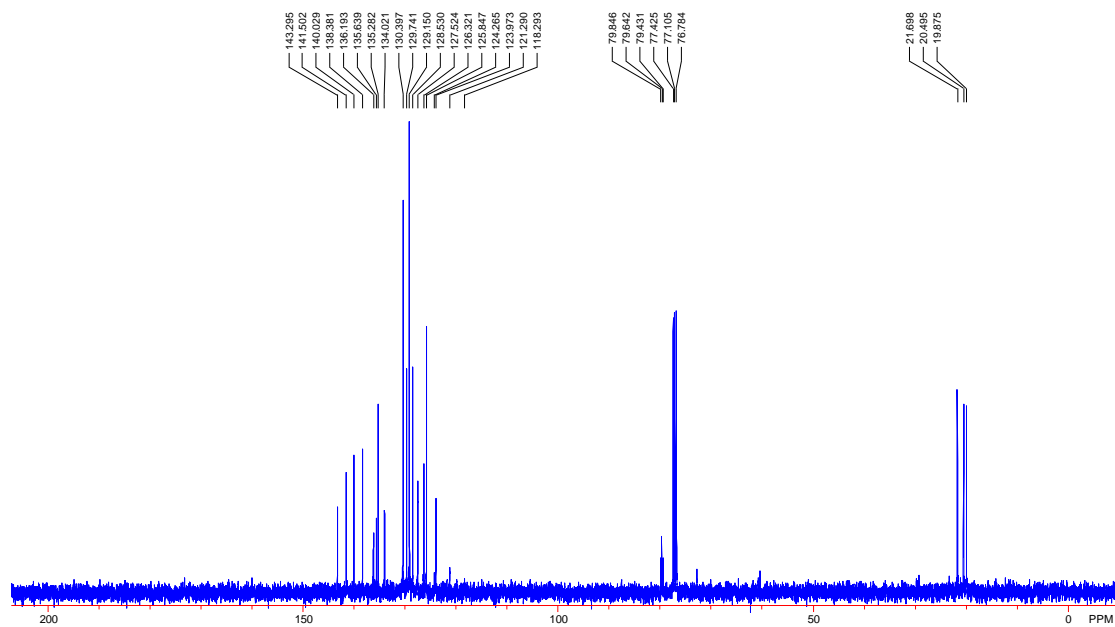

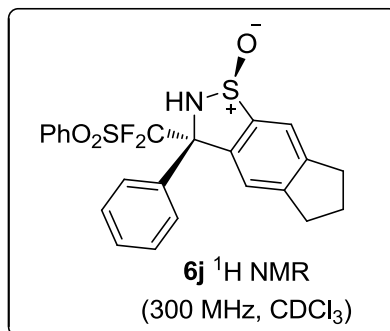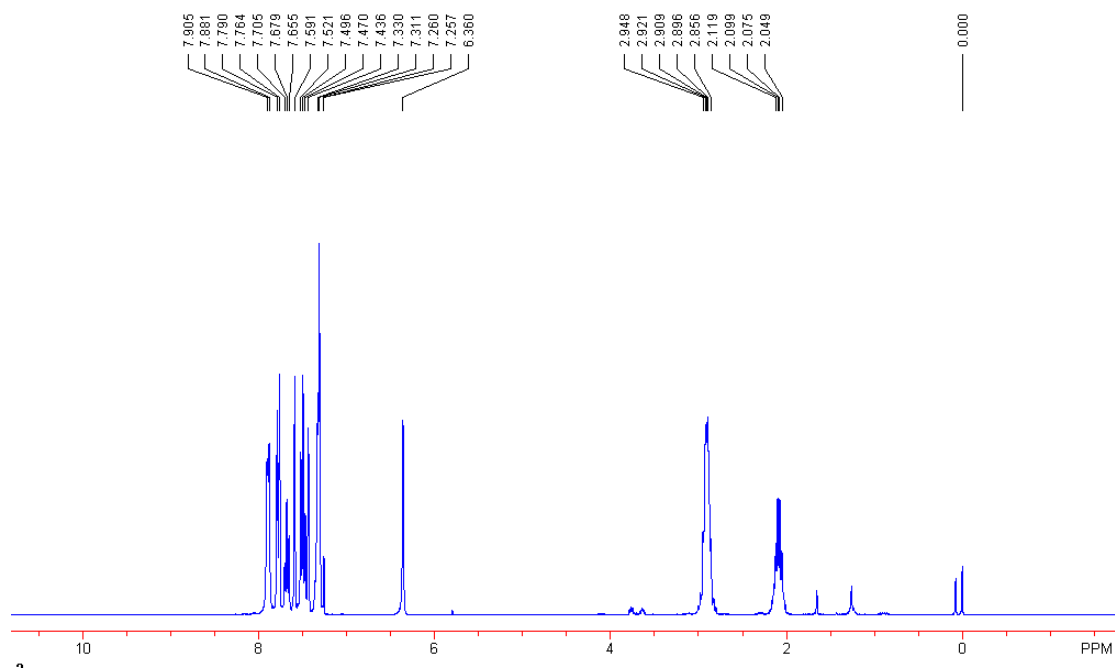

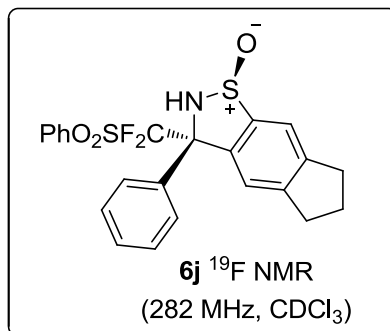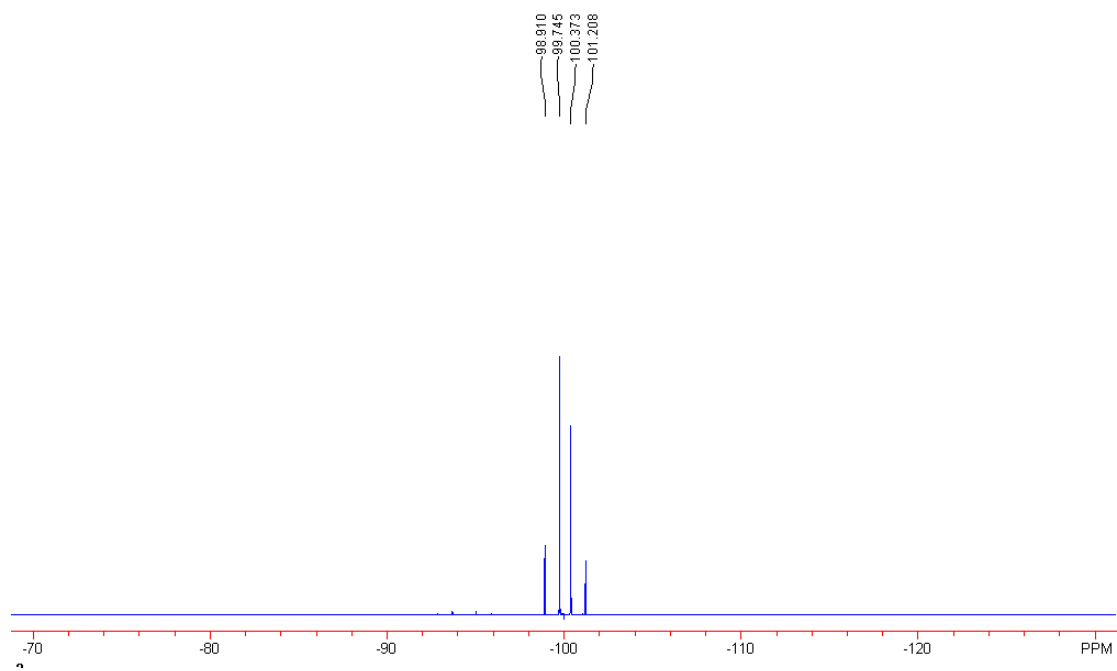

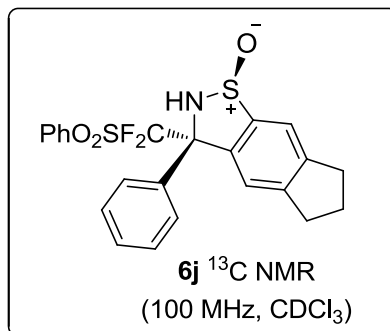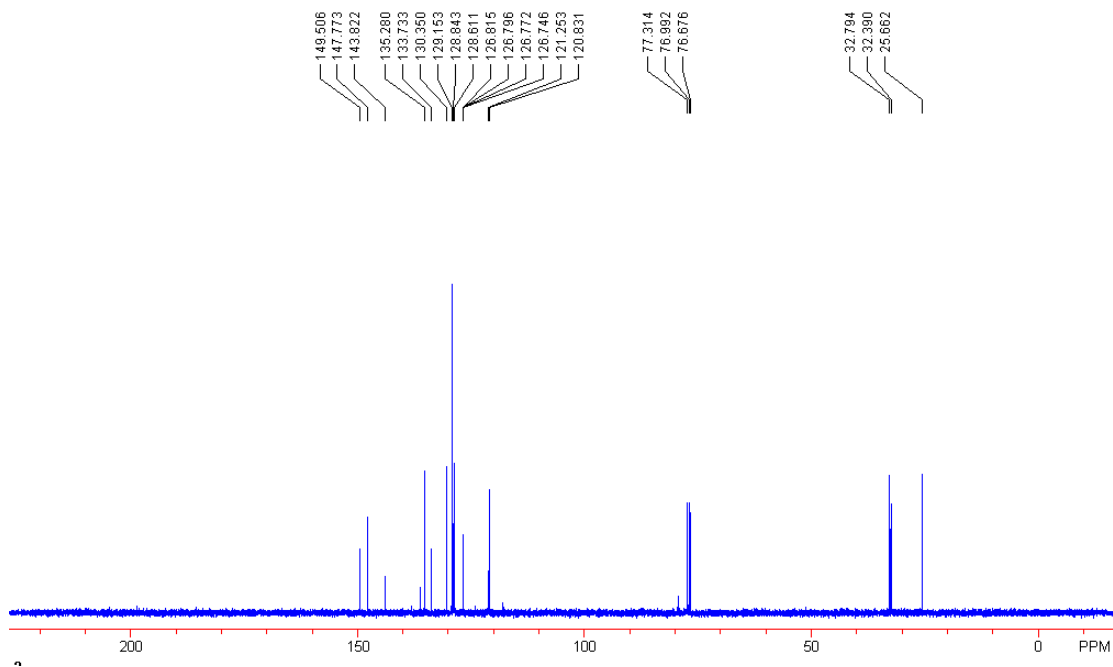

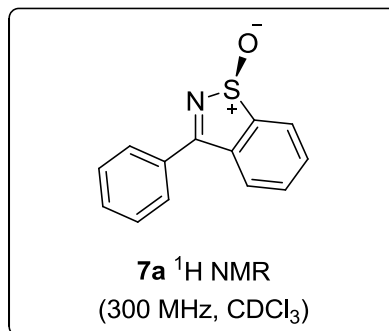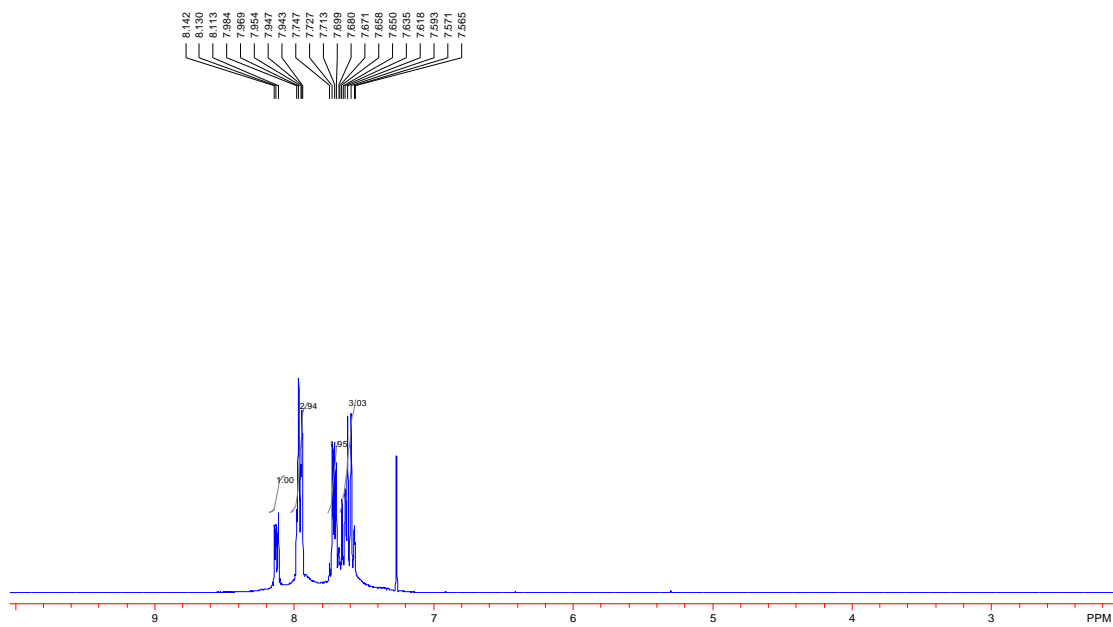

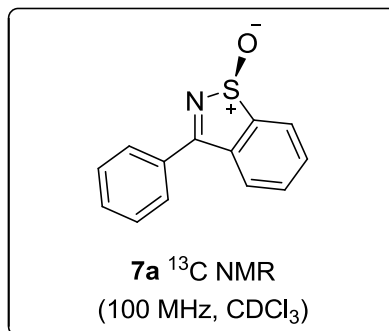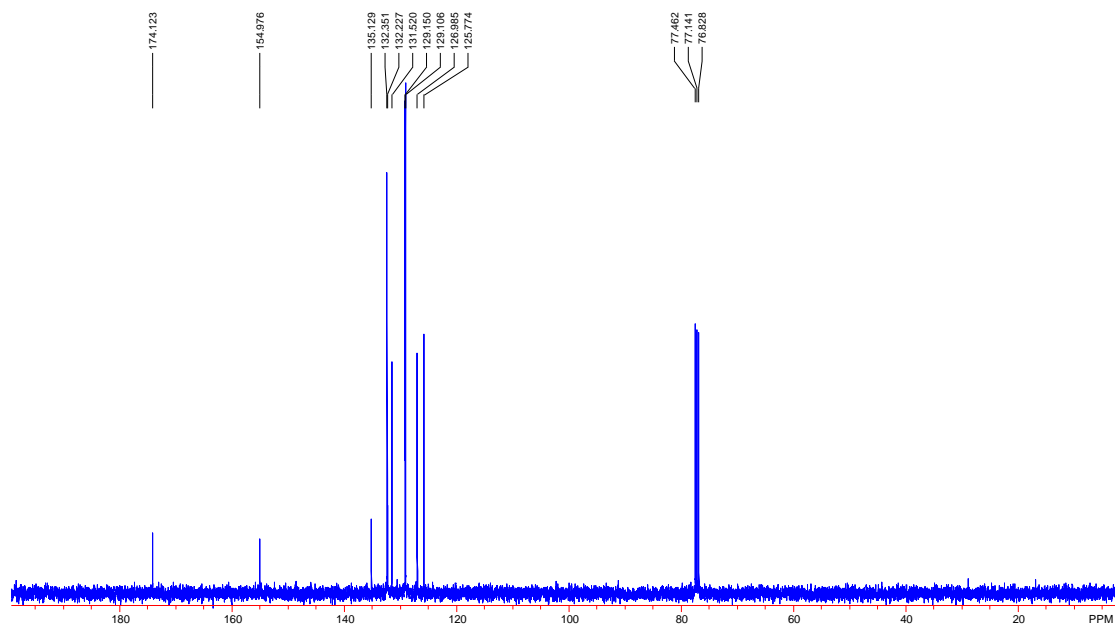



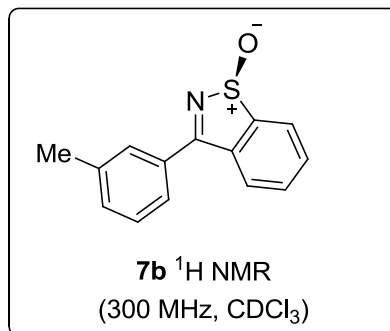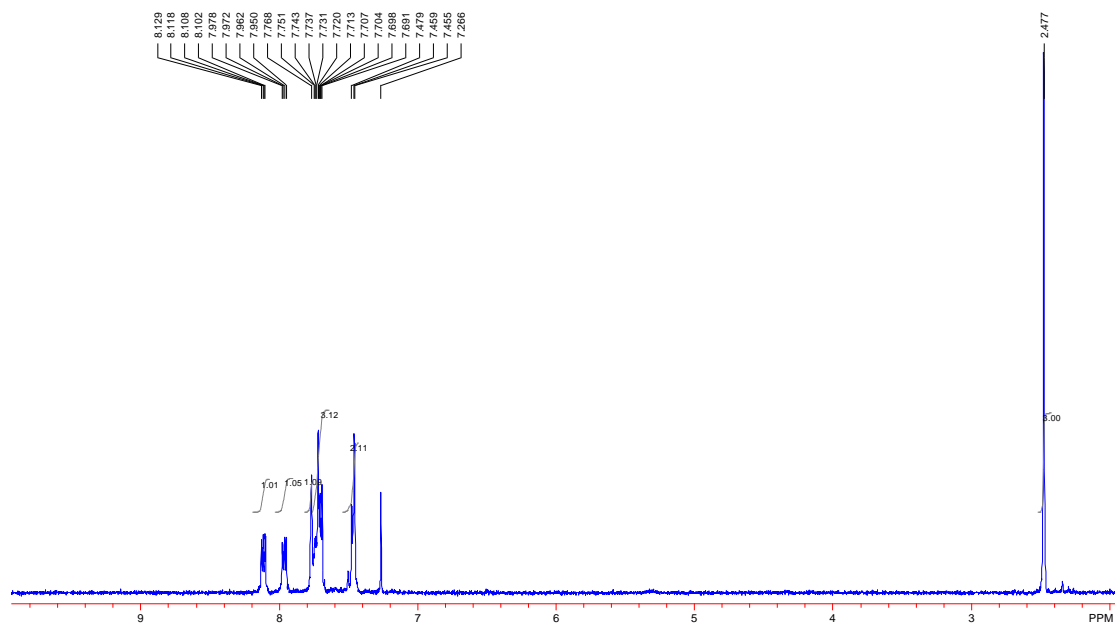

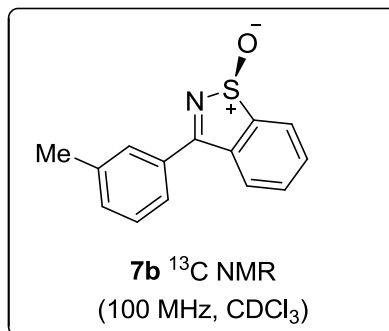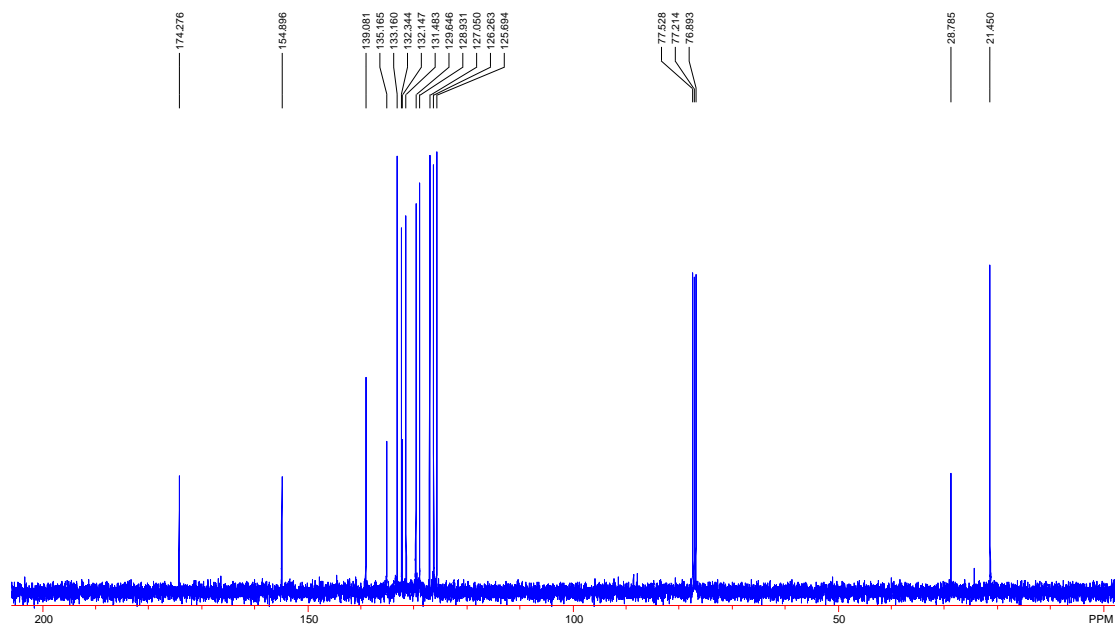

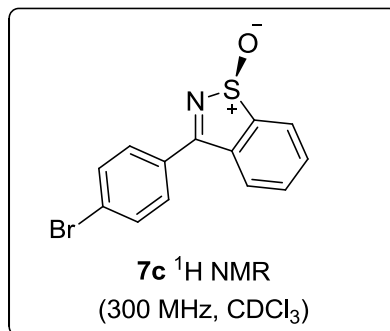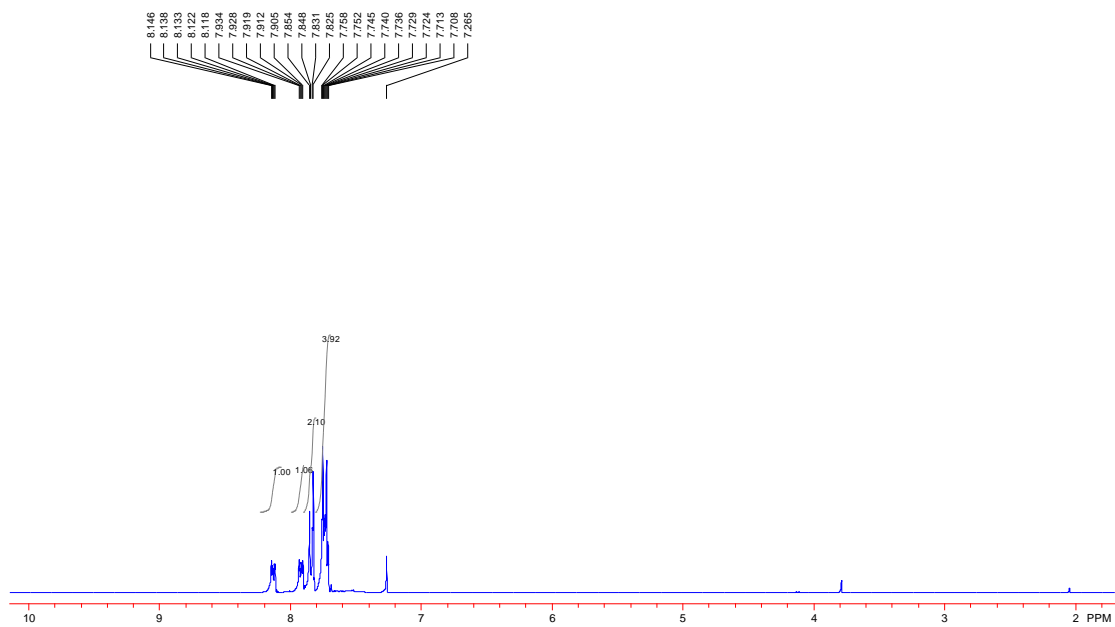

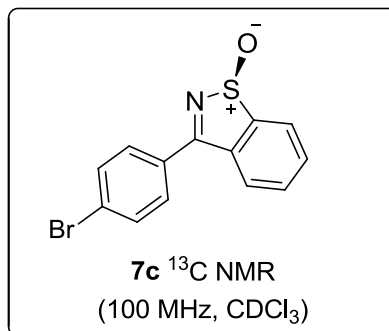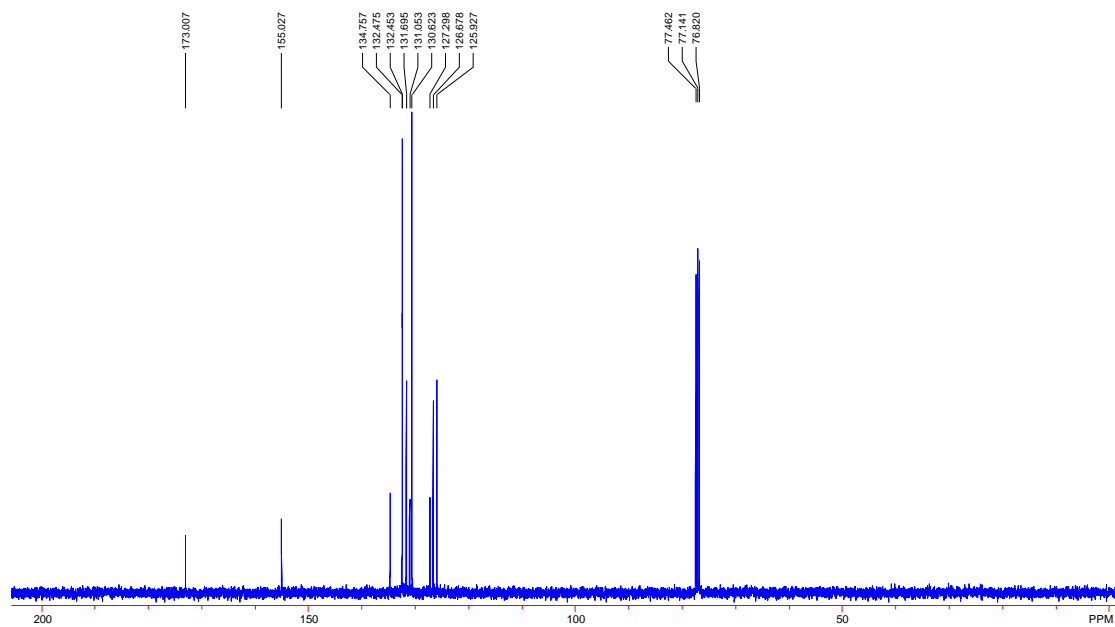

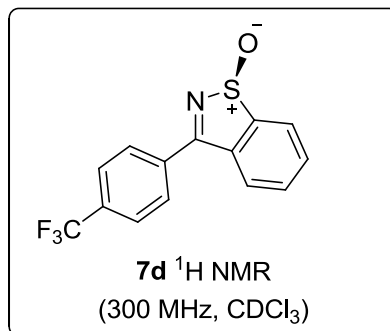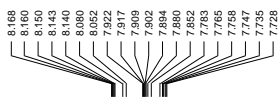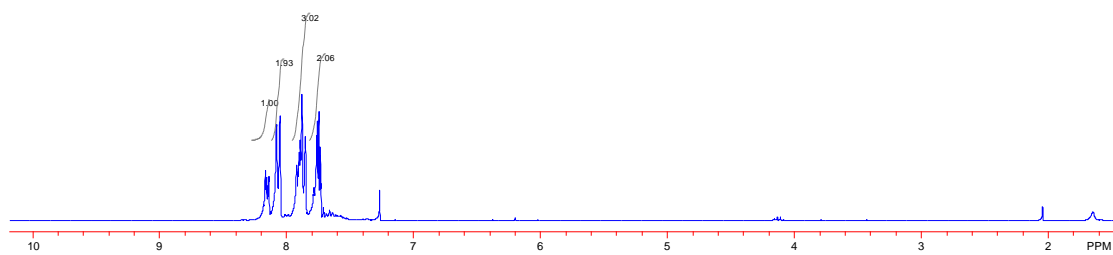

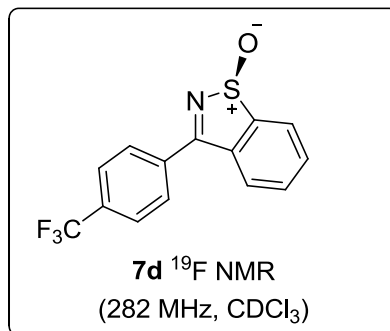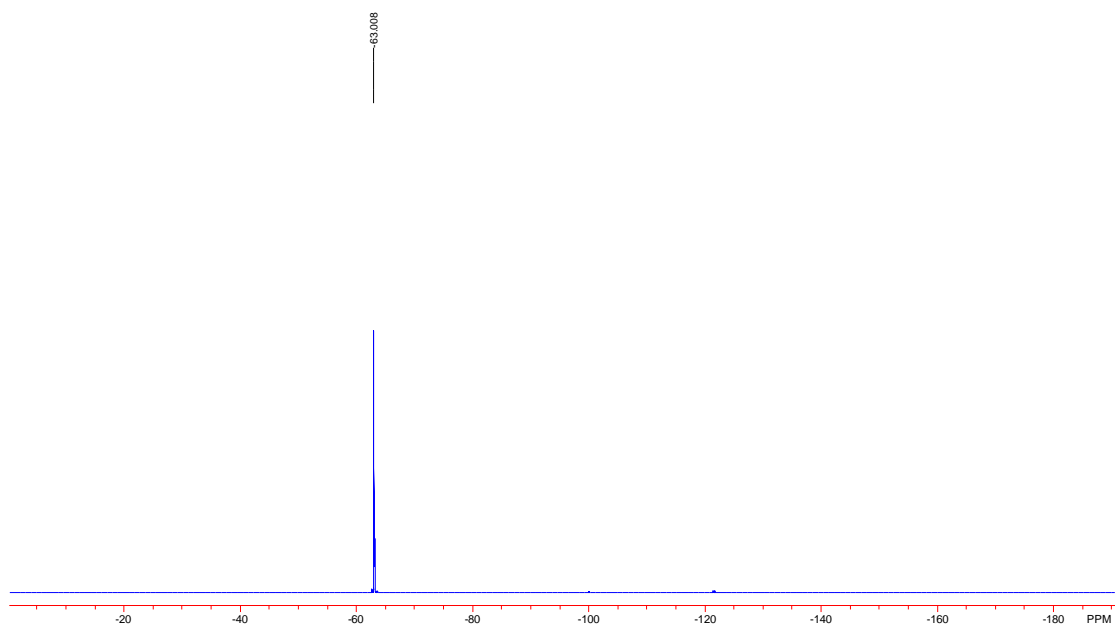

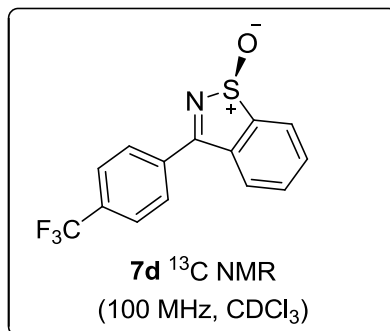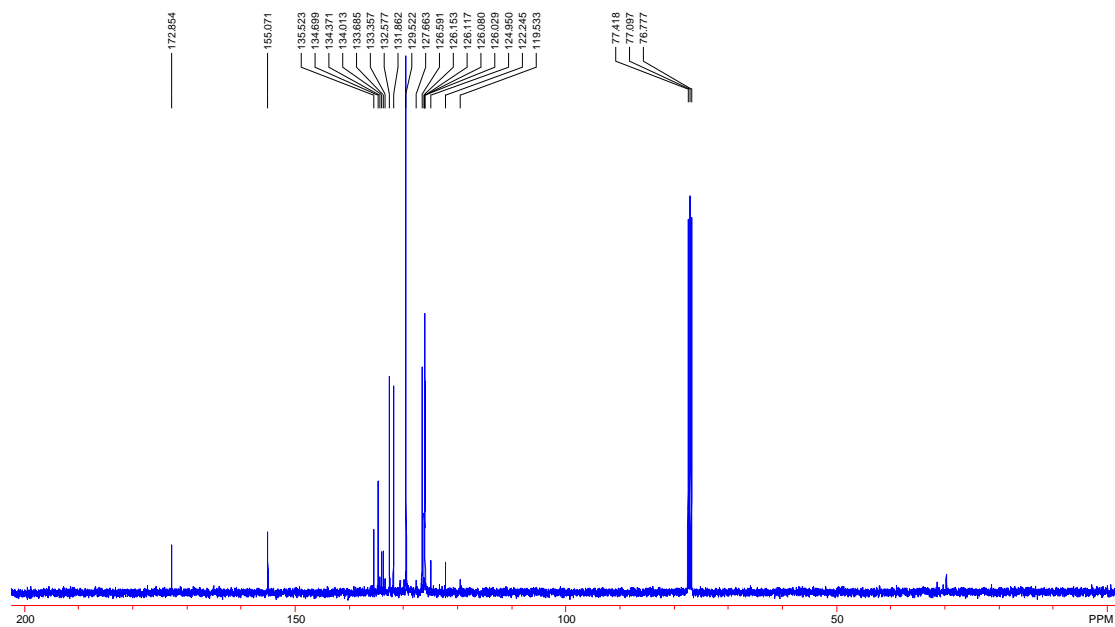

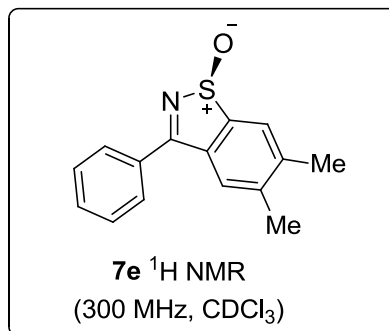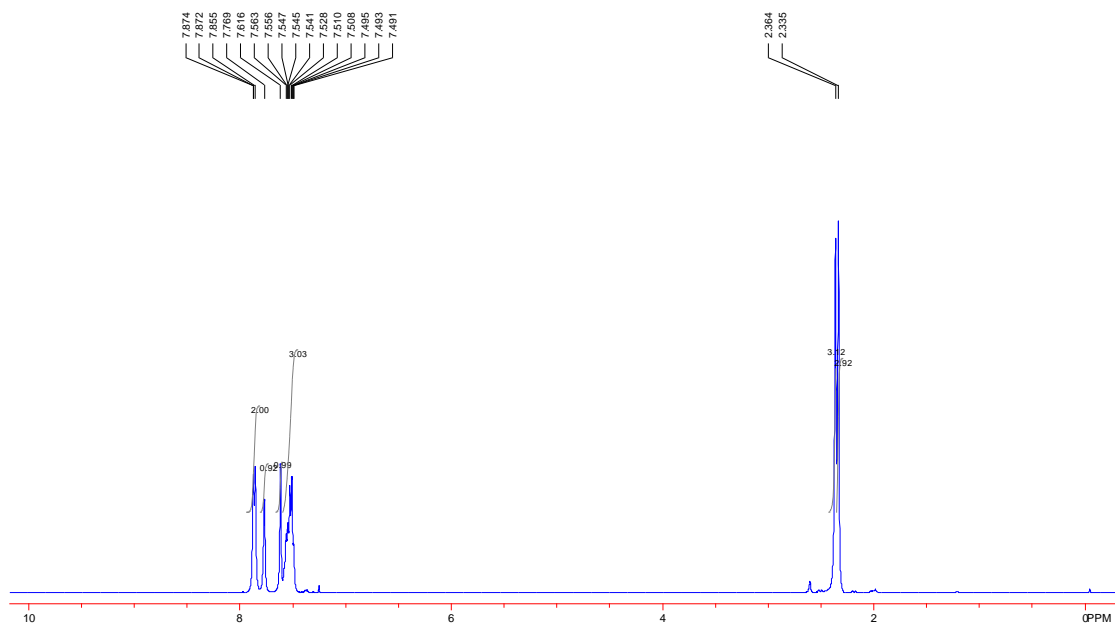



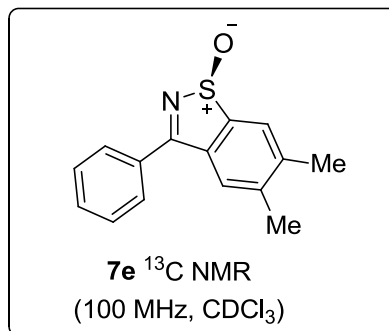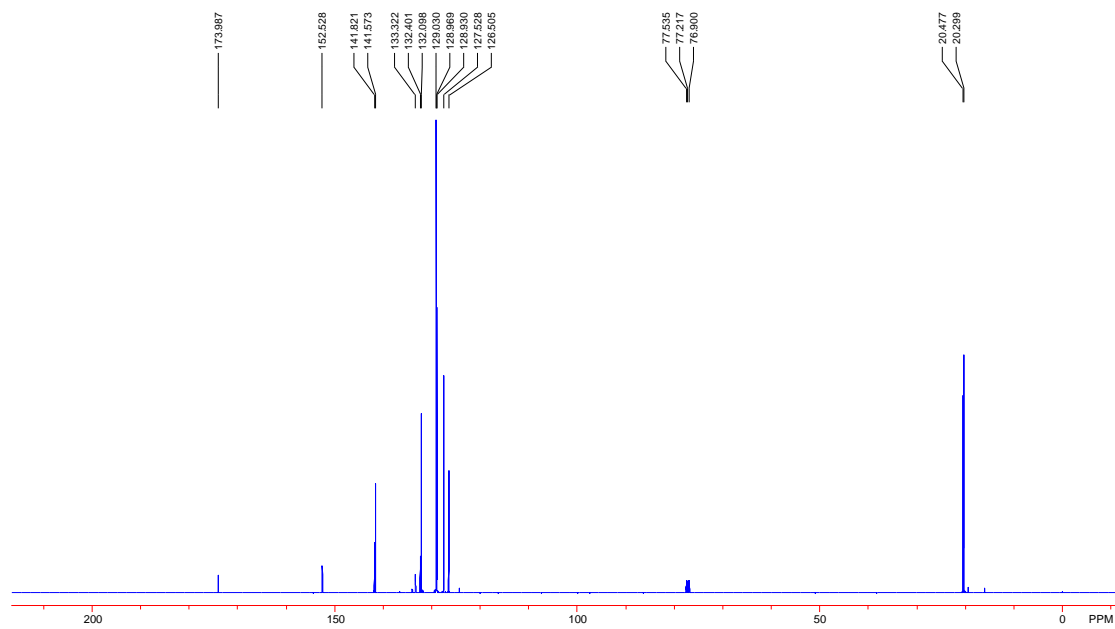

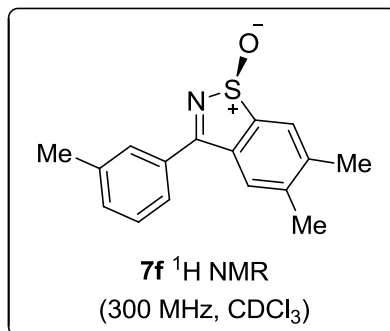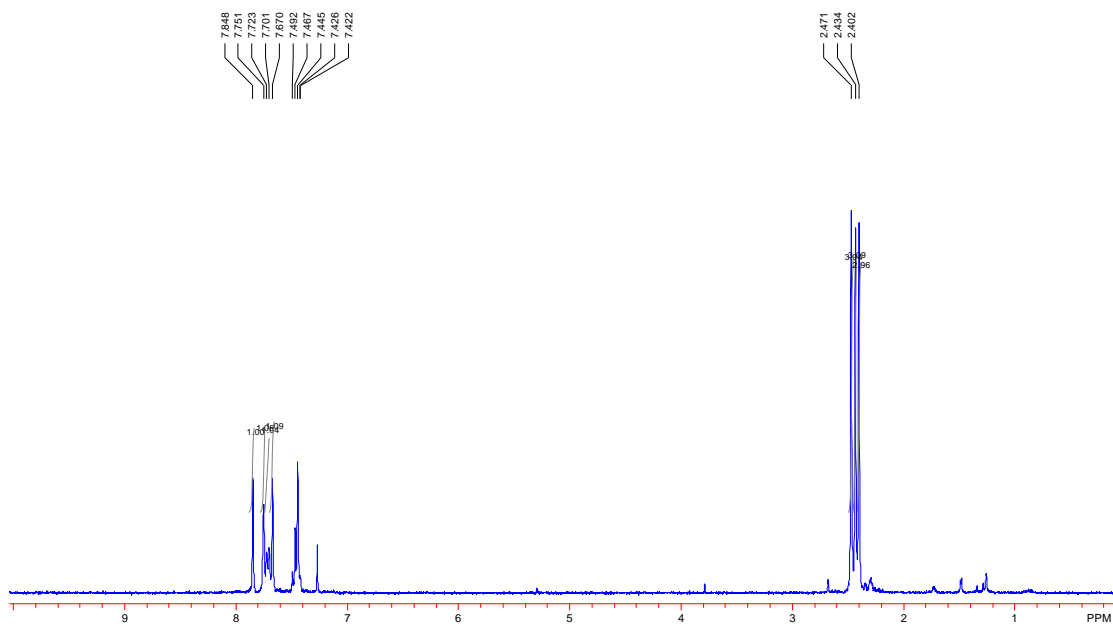

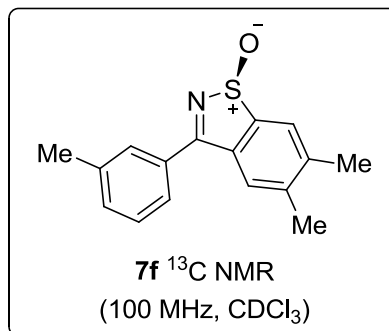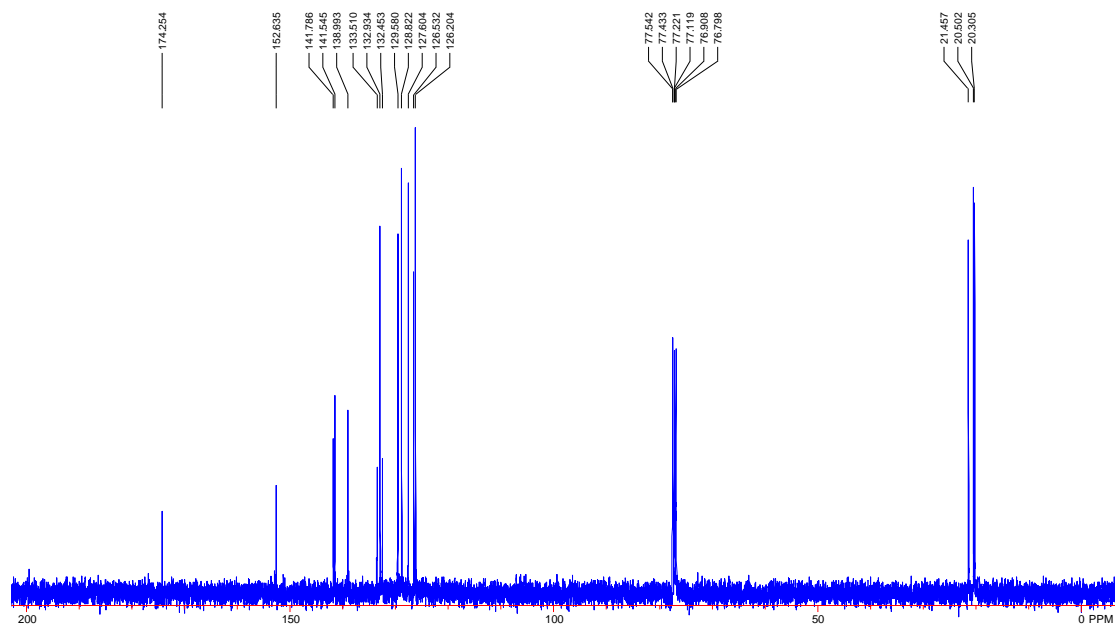

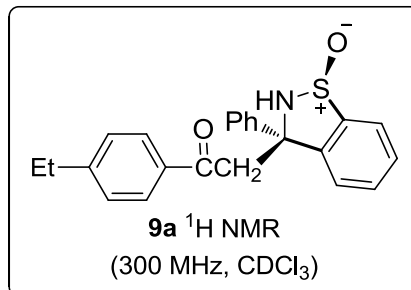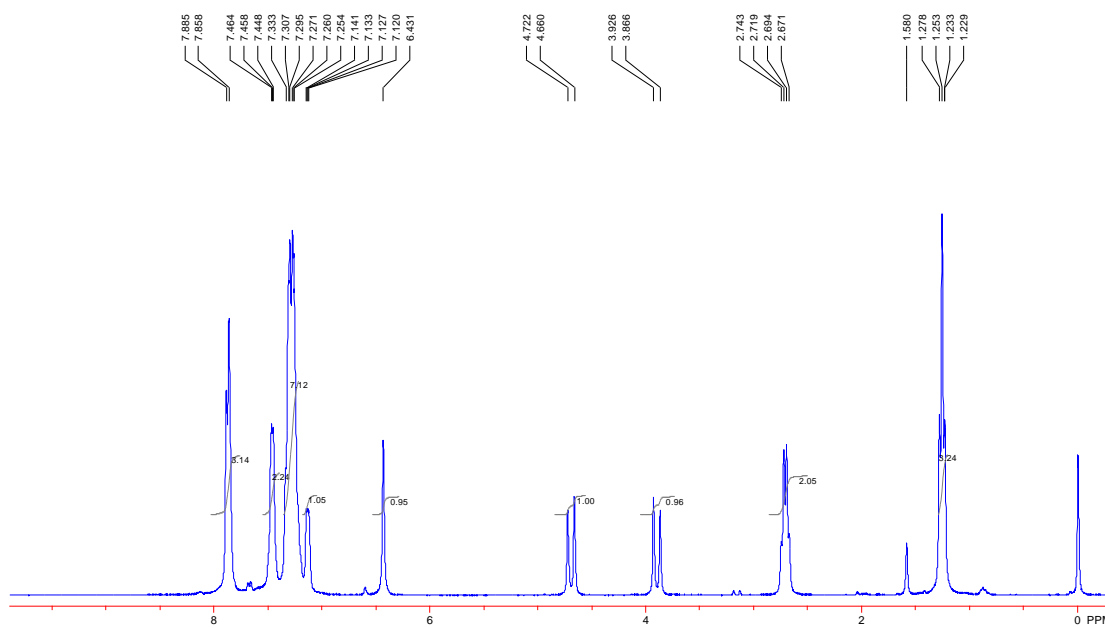

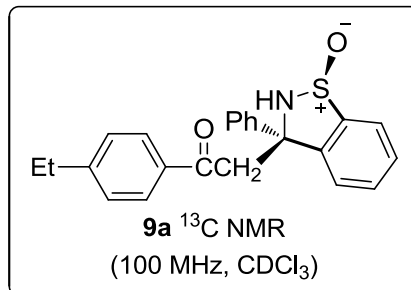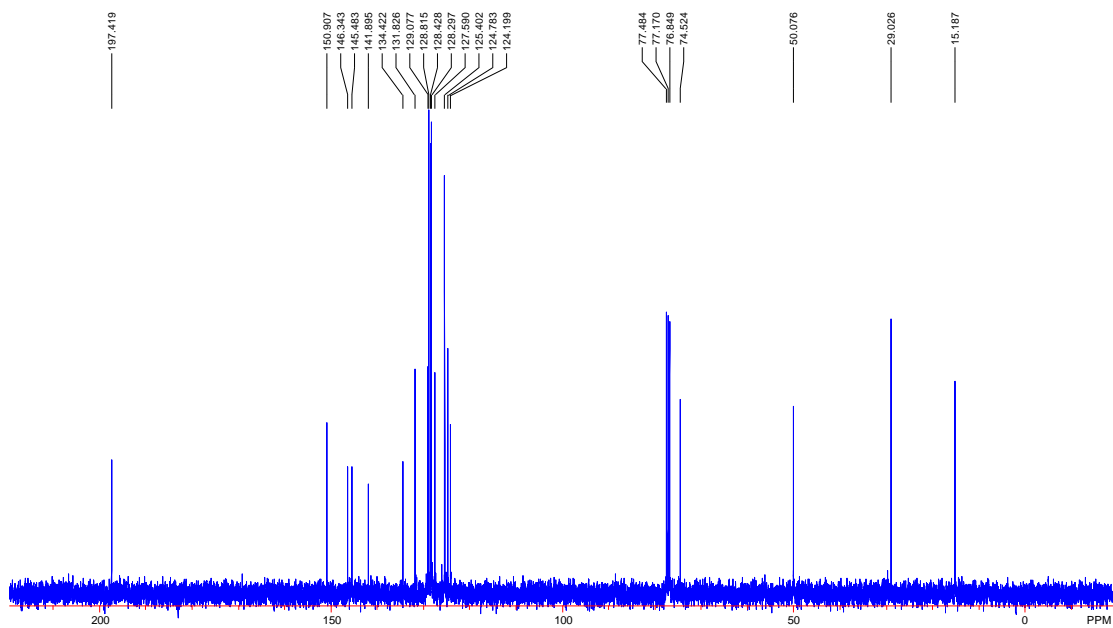

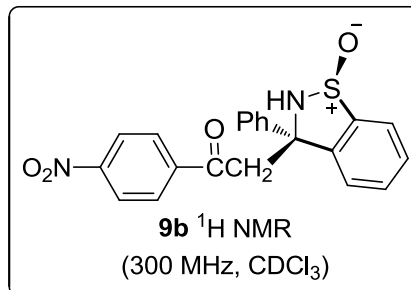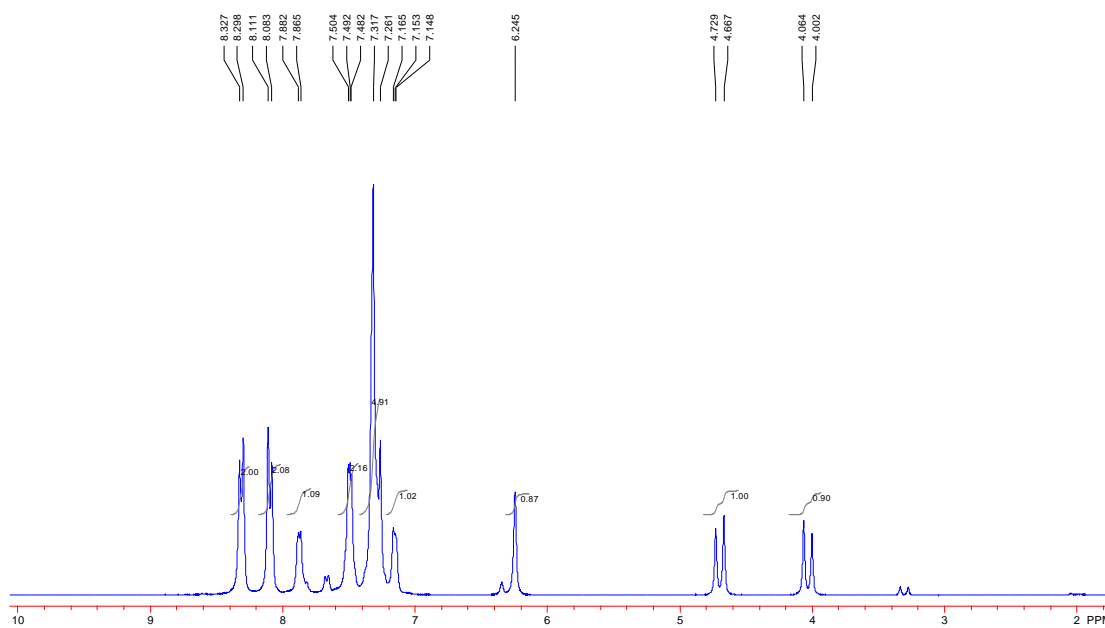

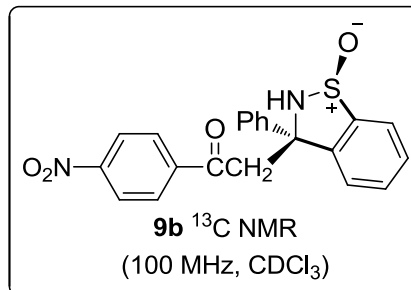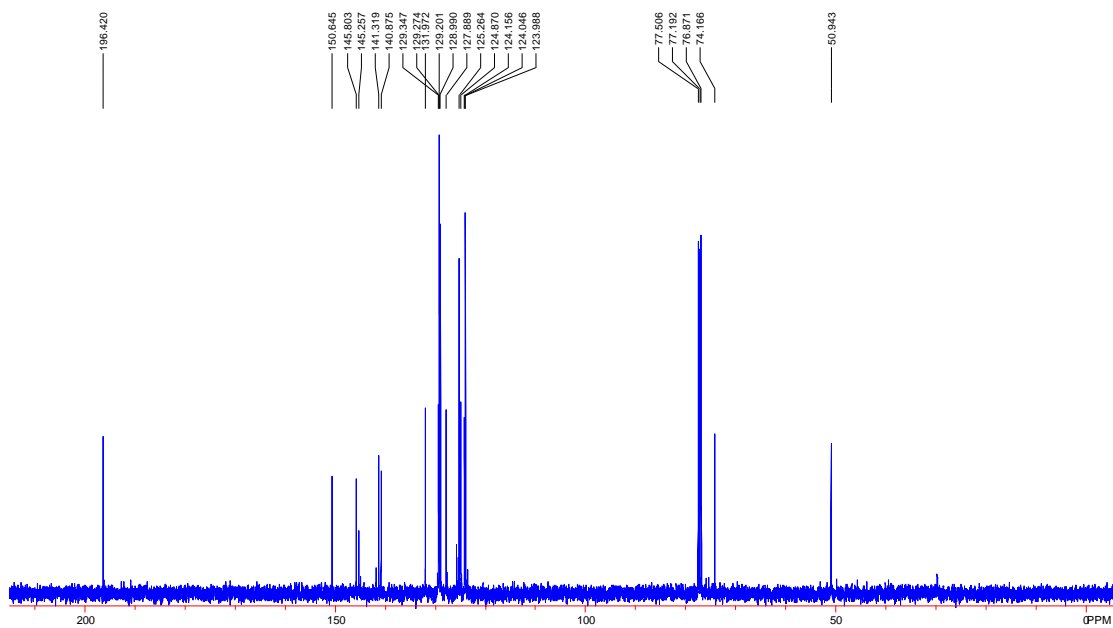

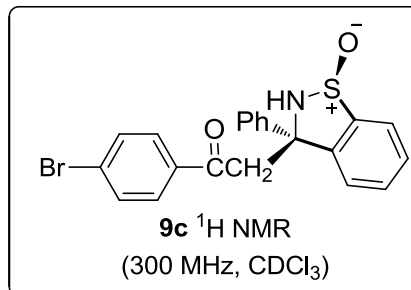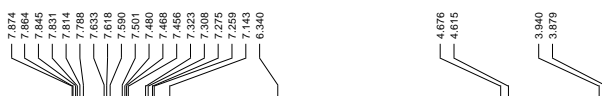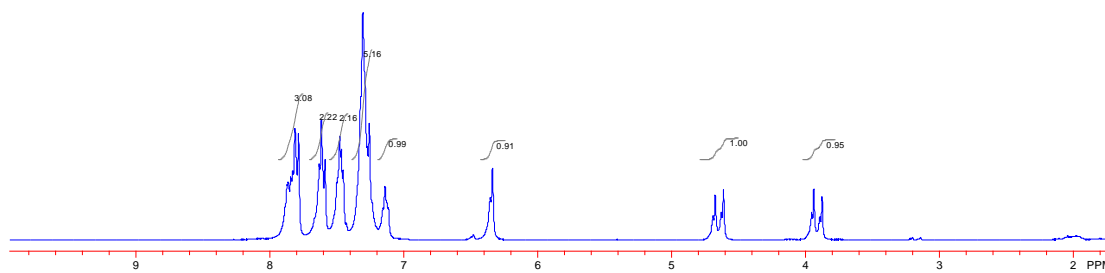



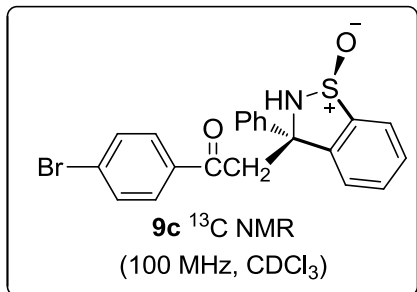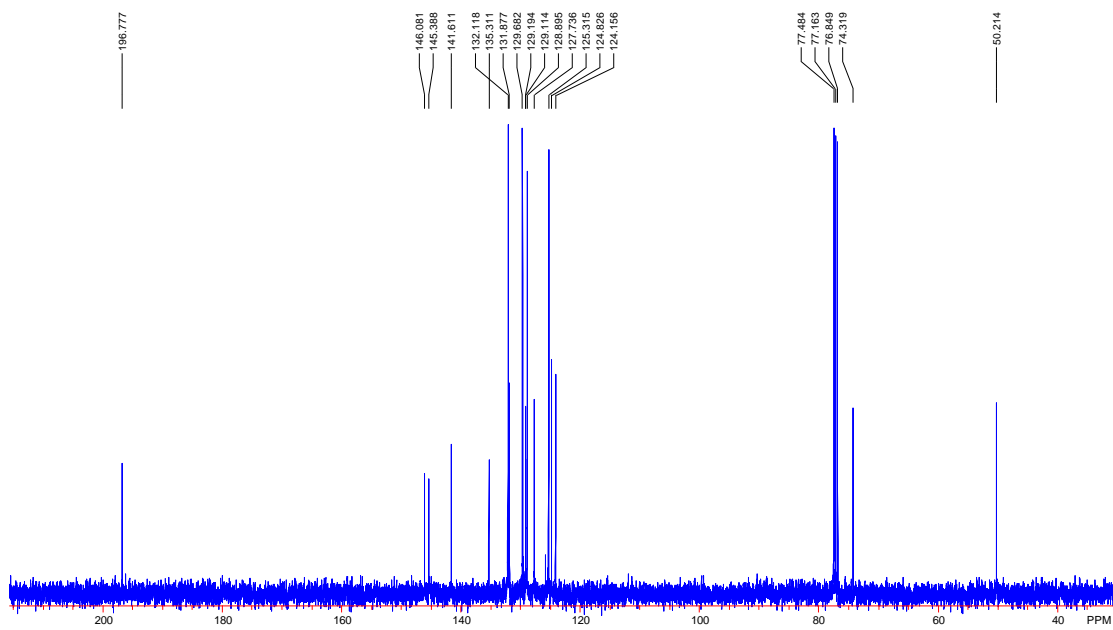

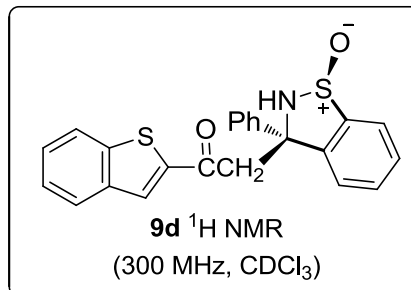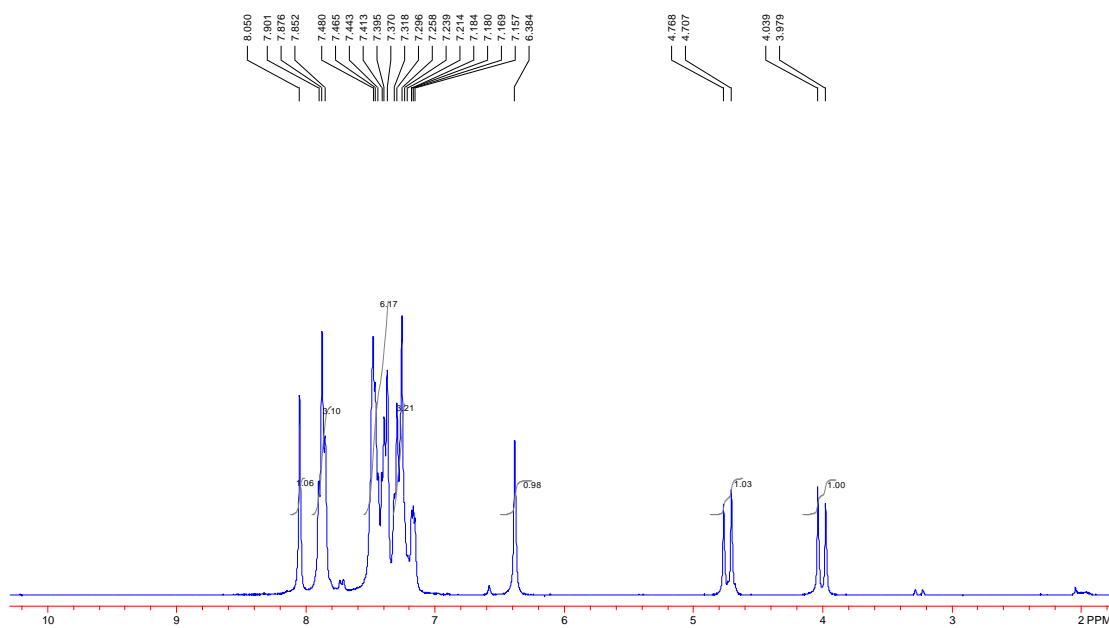

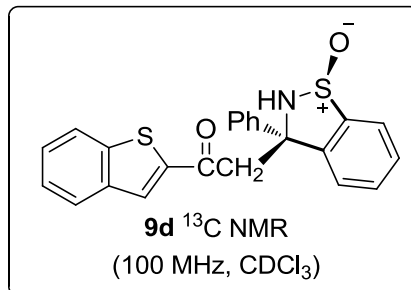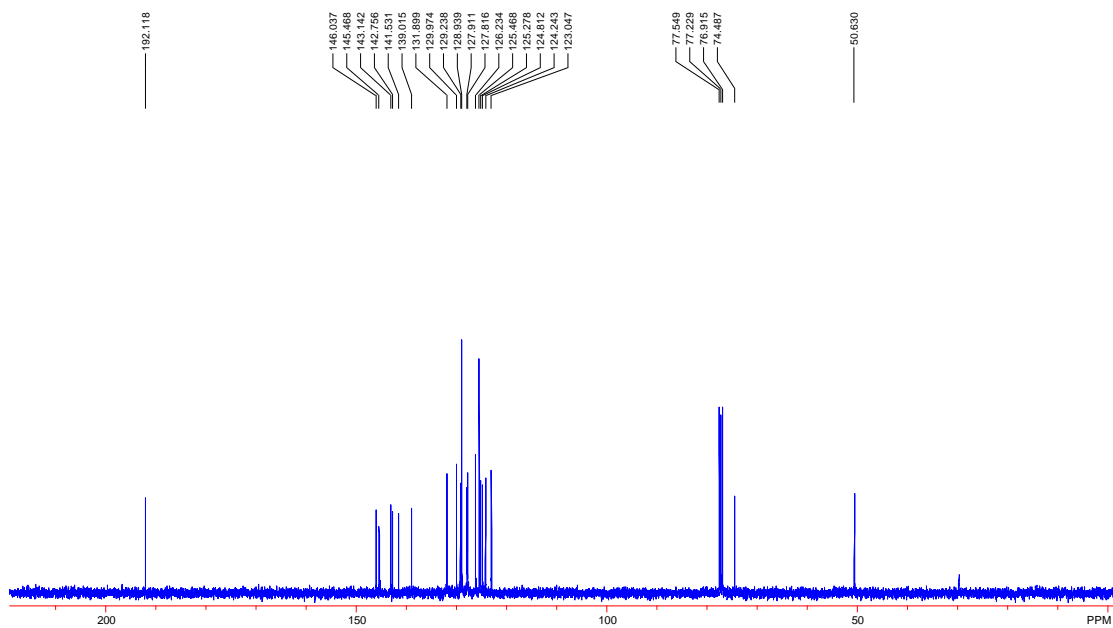

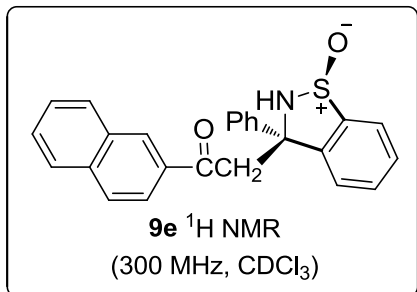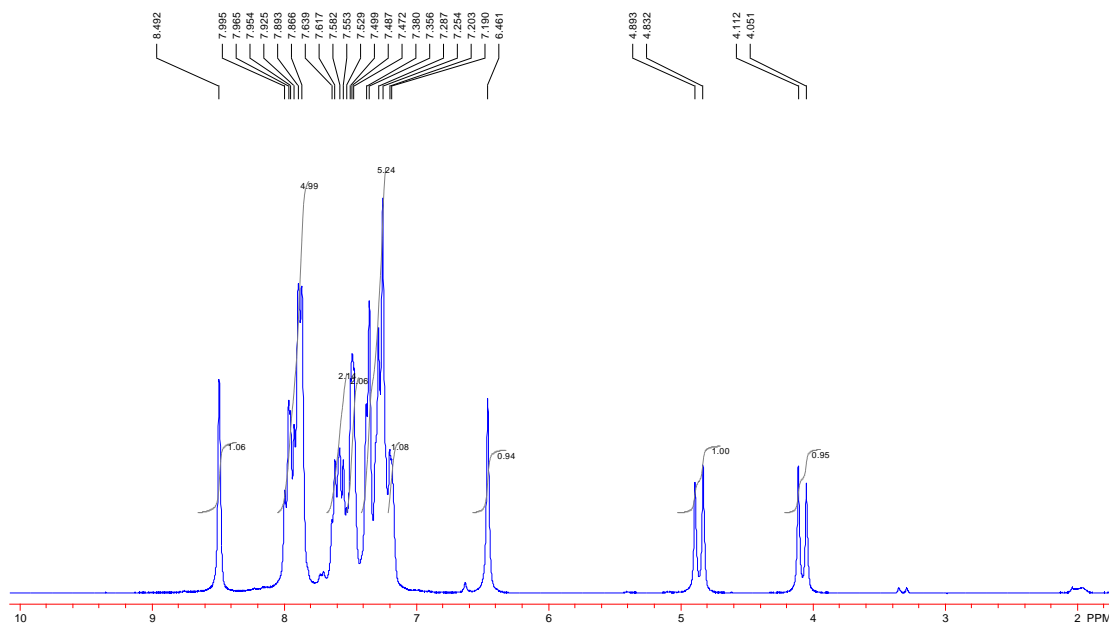

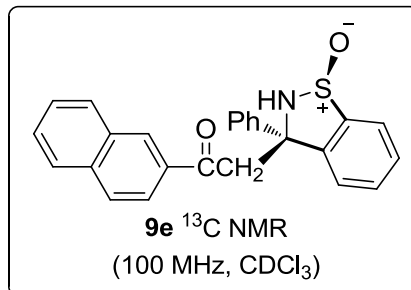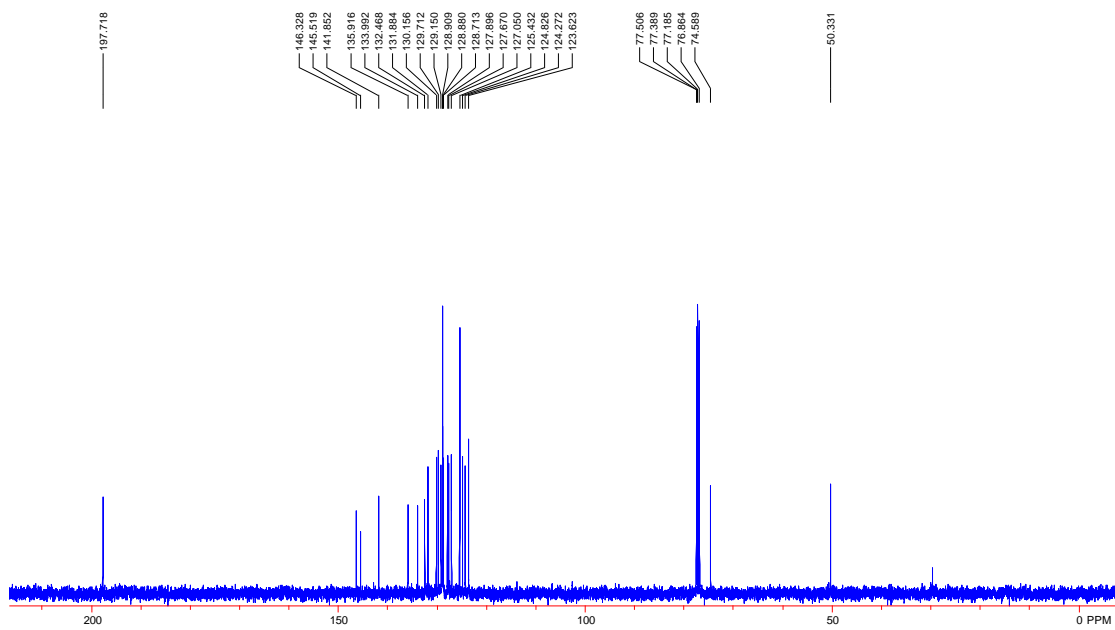

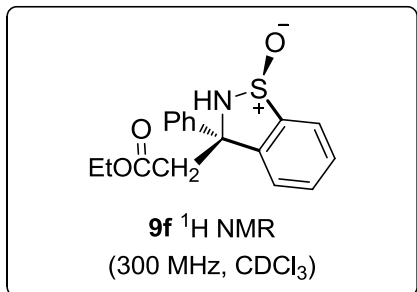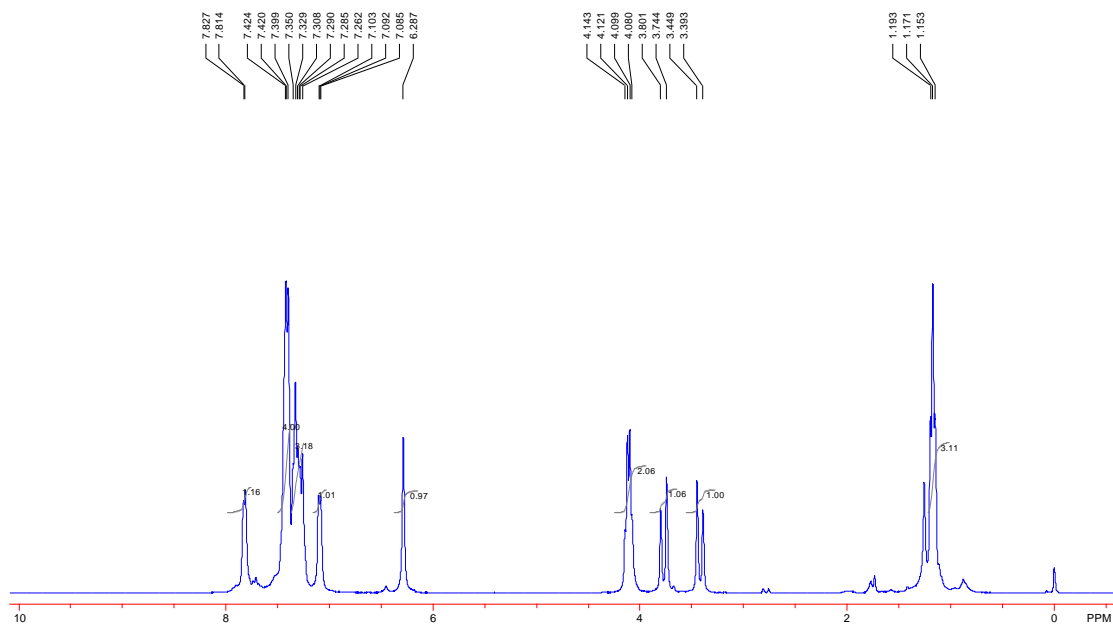

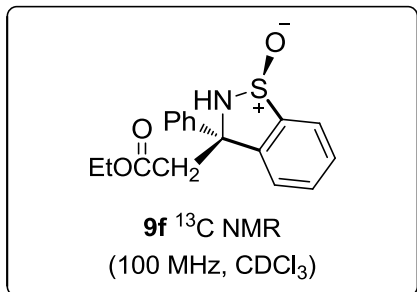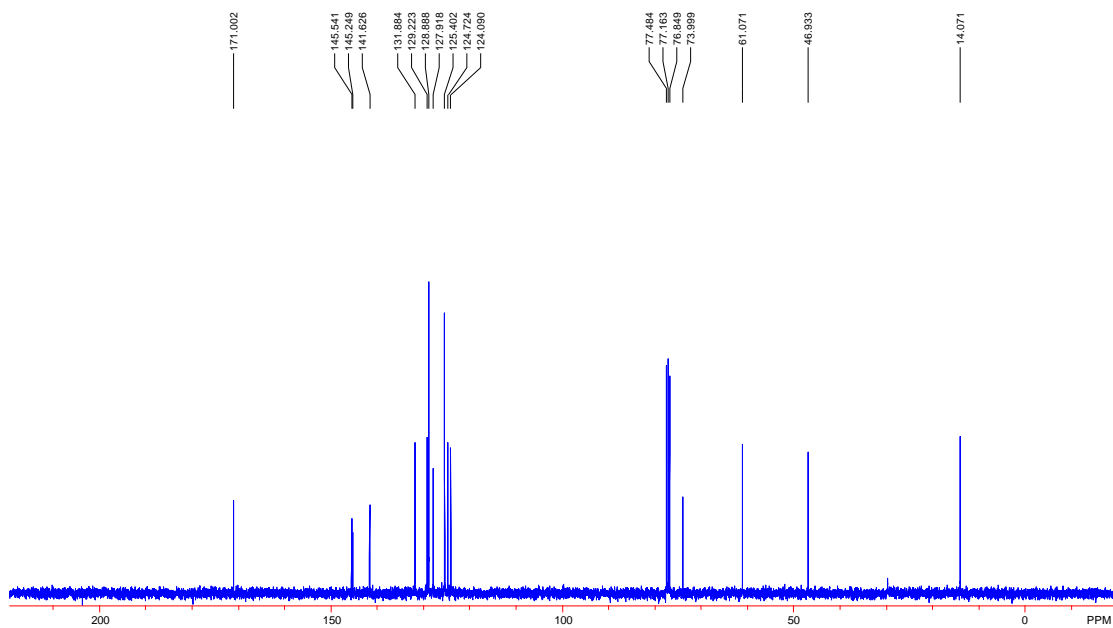

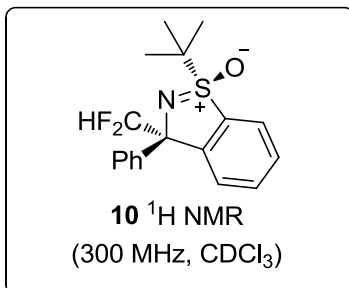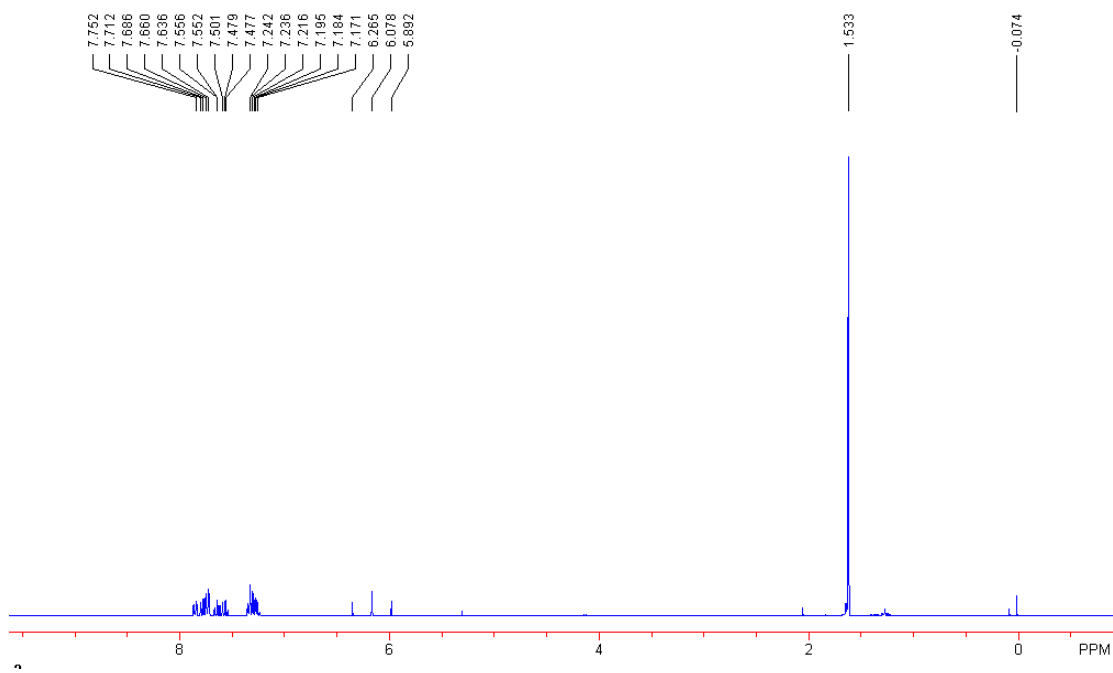



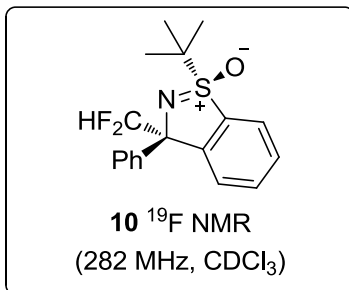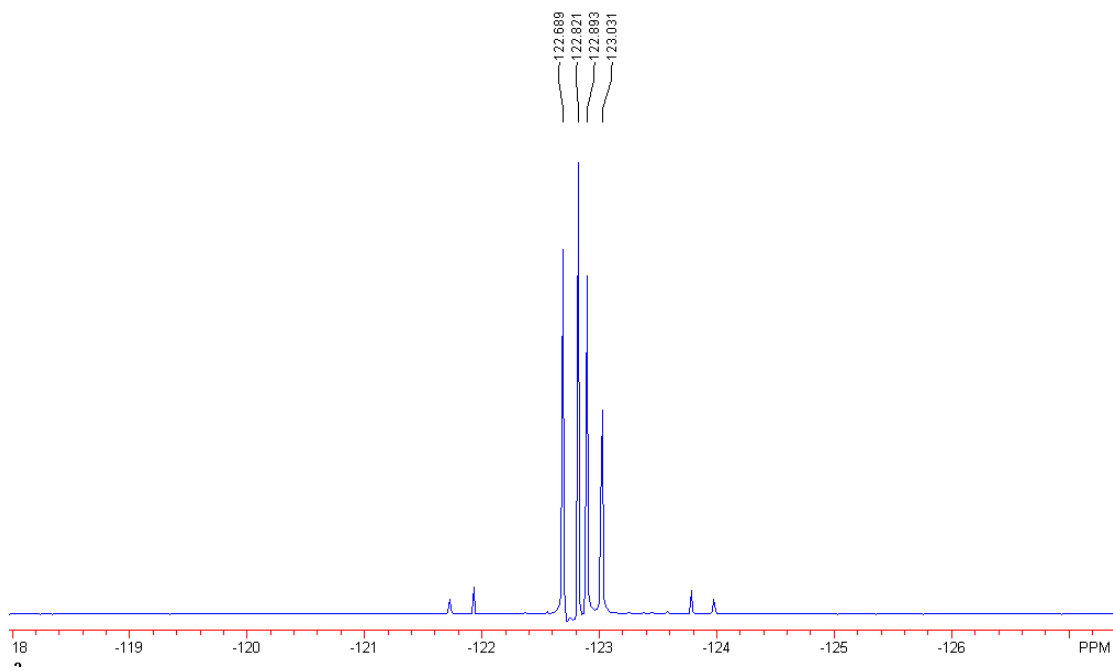

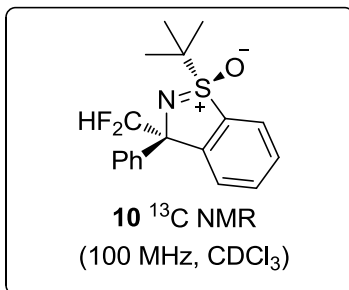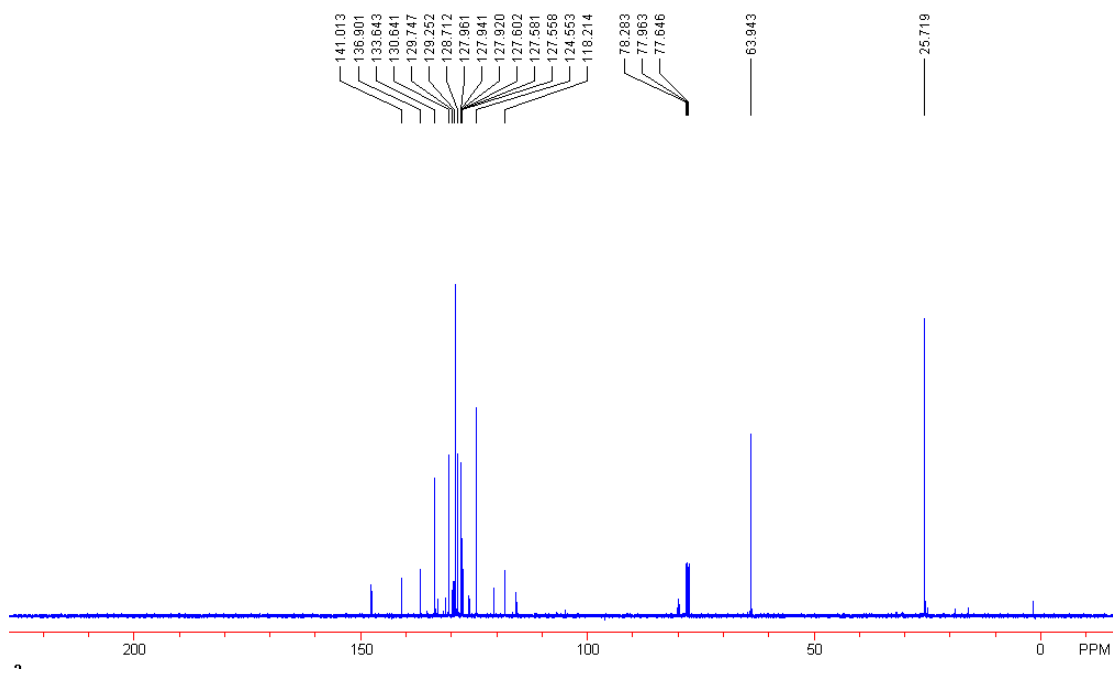

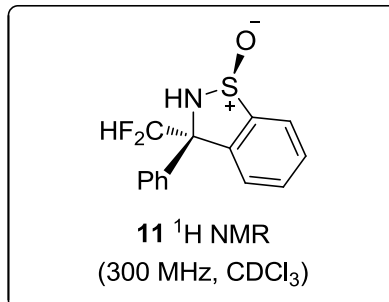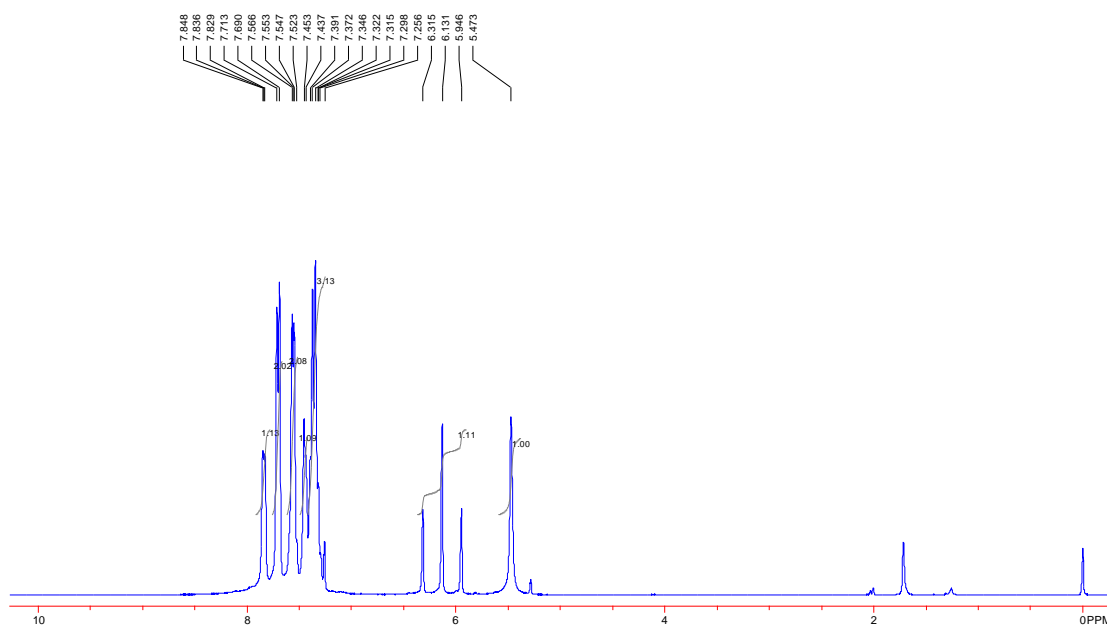

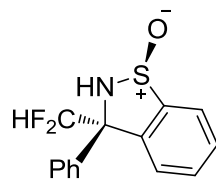

11  $^{19}\text{F}$  NMR  
(282 MHz,  $\text{CDCl}_3$ )

-122.157  
-122.350  
-123.131  
-123.325  
-125.507  
-125.504  
-126.282  
-126.479

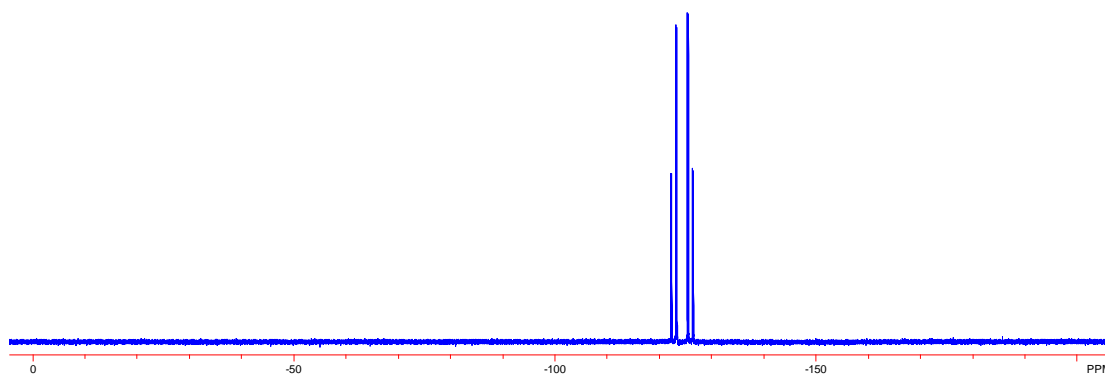

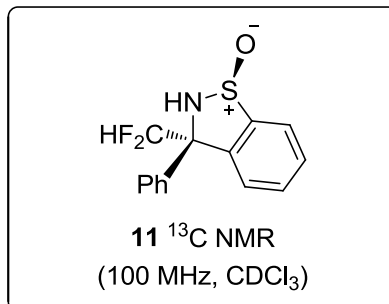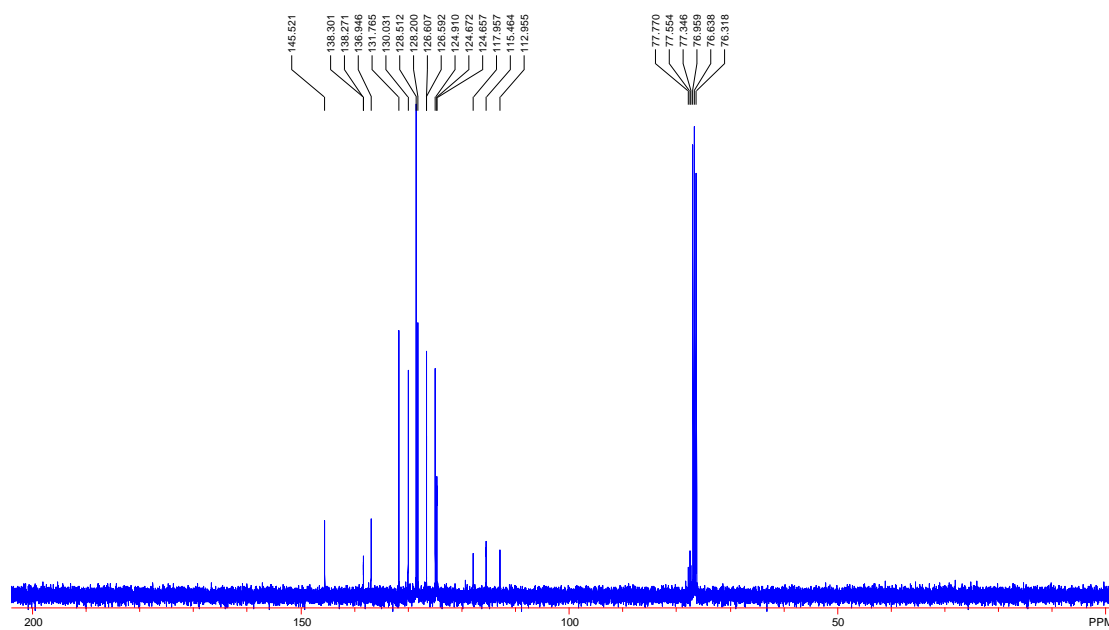

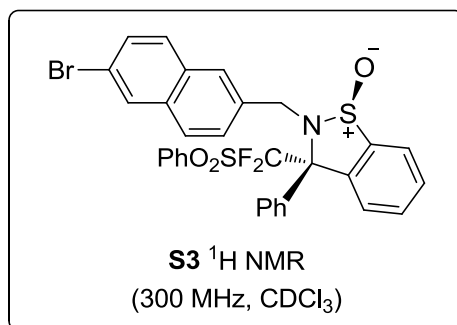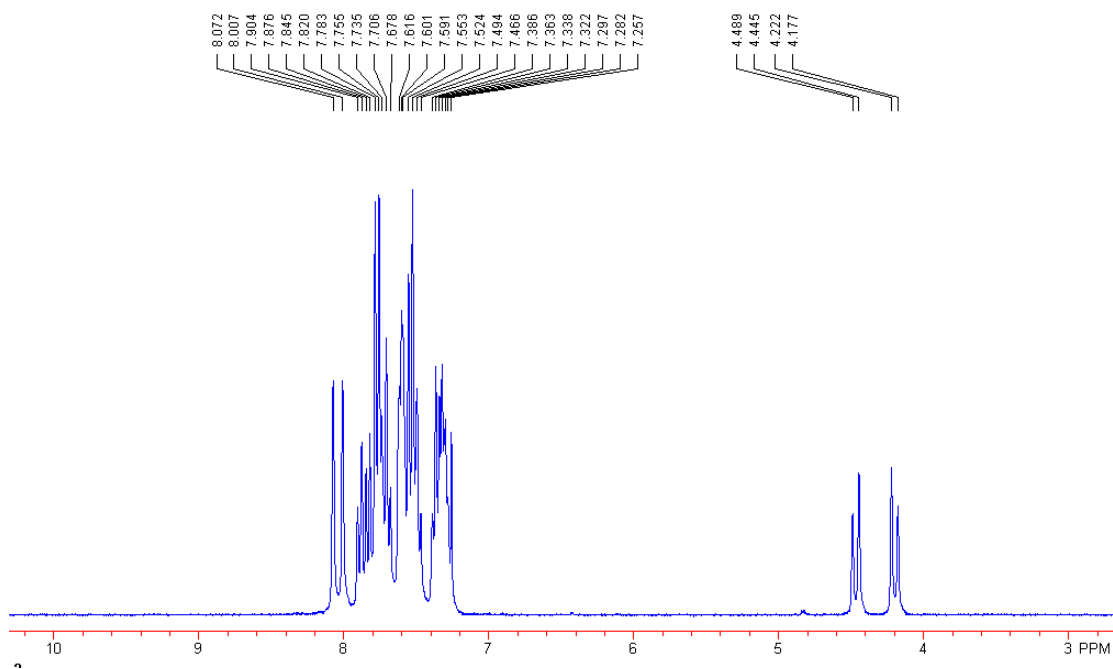

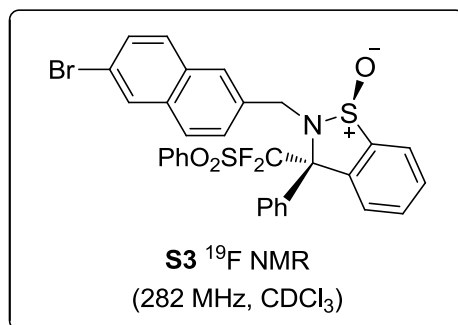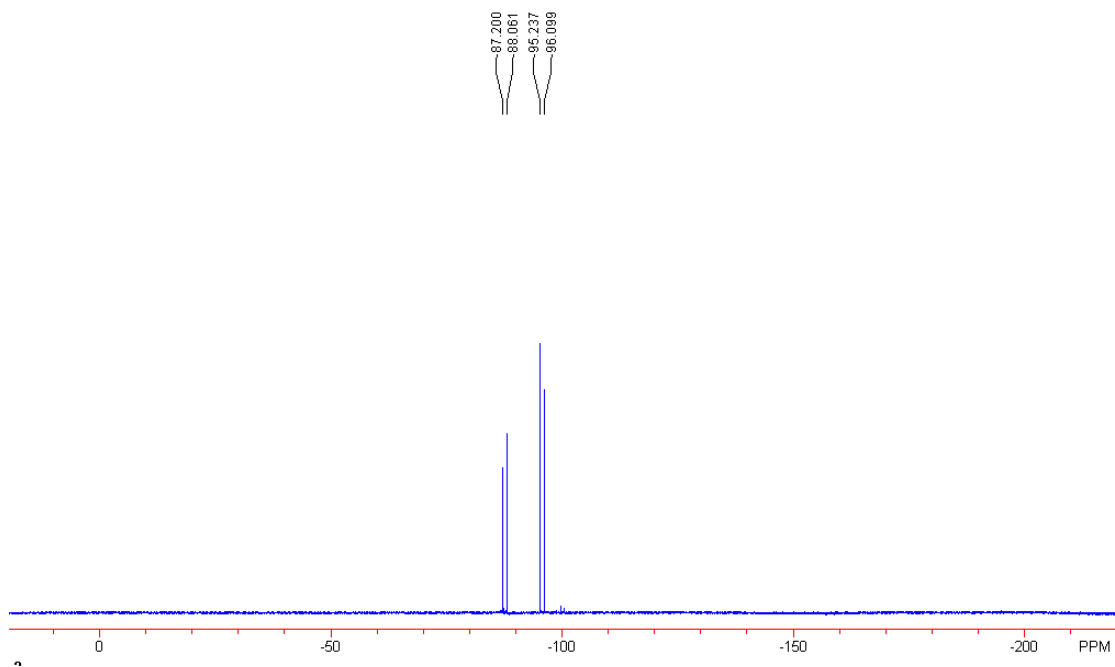

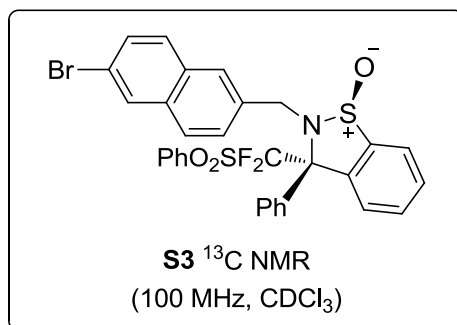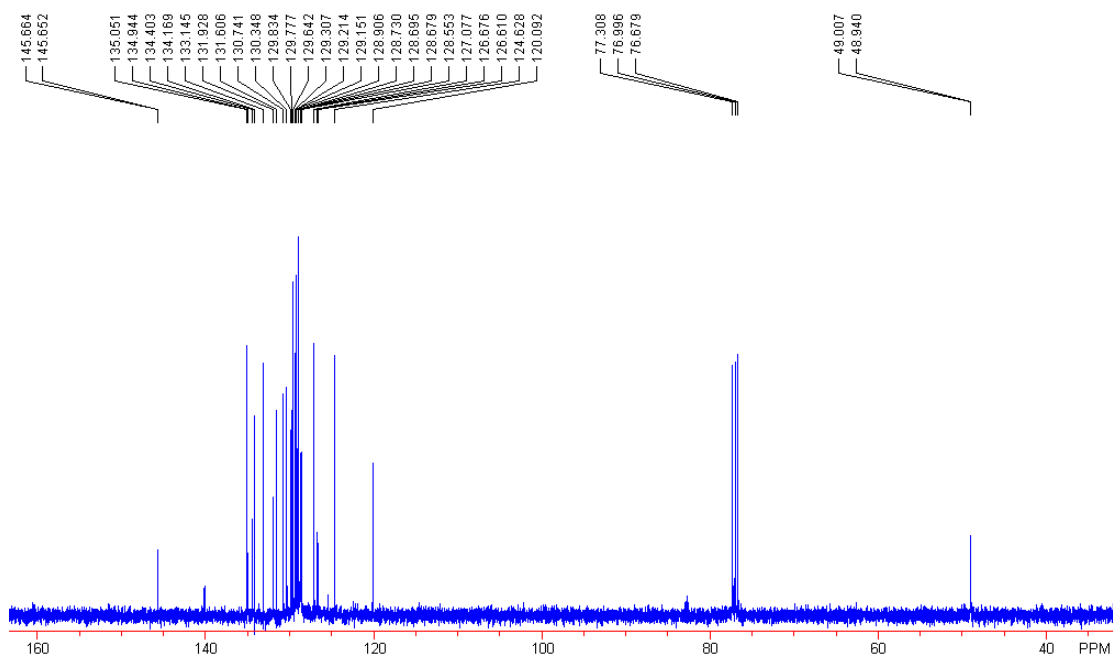



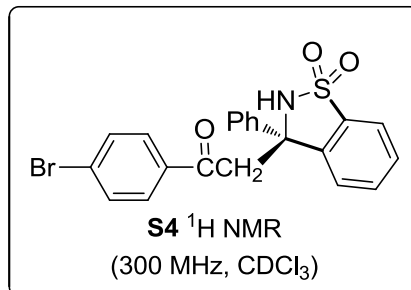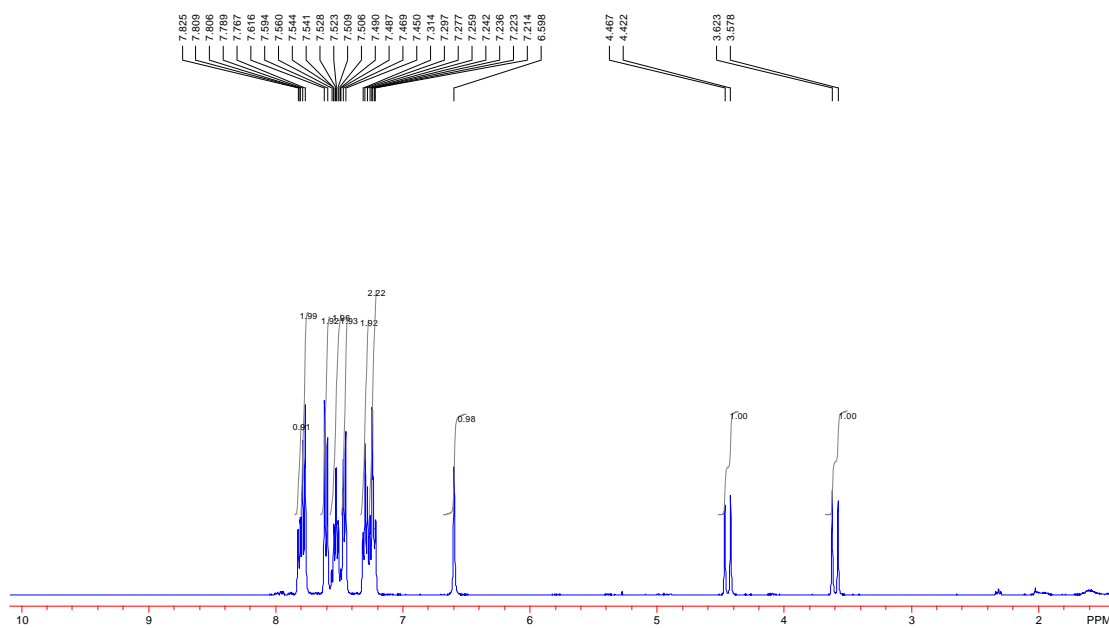

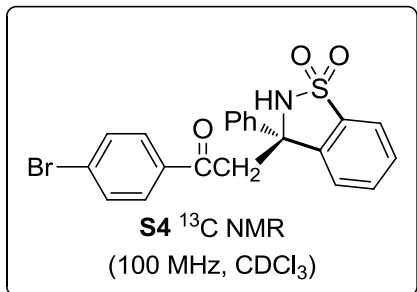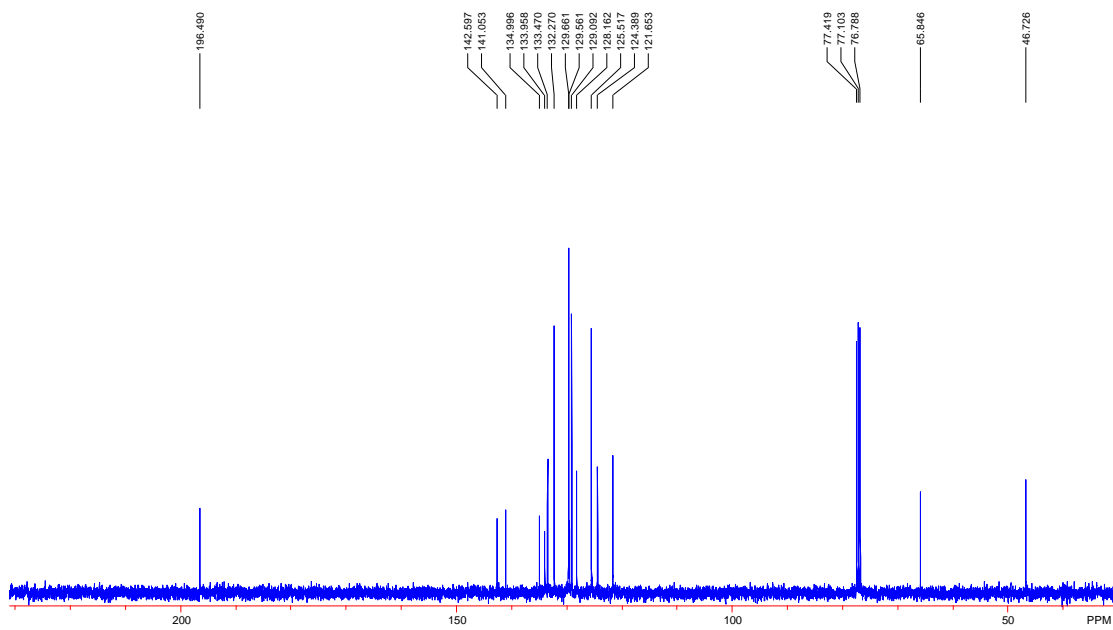

Supplement: c4cc05042h1.pdf [file c4cc05042h1.pdf]
